# Supplementary material for: Genome Analysis of the Broad Host Range Necrotroph Nalanthamala psidii Highlights Genes Associated With Virulence
Source: Front Plant Sci. 2022 Feb 25;13:811152. doi: 10.3389/fpls.2022.811152 (PMC8914235; doi:10.3389/fpls.2022.811152)
Supplement: Supplementary file 1 [file Data_Sheet_1.xlsx]

## Sheet: S1
Supplementary Table S1.	InterPro v5.26-65.0 annotation of the N. psidii proteome.
Protein	Length	Analysis	Signature accession	Signature description	Start	Stop	Score	InterPro accession	InterPro annotation
N_psidii_MA3_00004	628	Pfam	PF12796	Ankyrin repeats (3 copies)	360	421	1.1e-06	IPR020683	Ankyrin repeat-containing domain
N_psidii_MA3_00007	868	Pfam	PF06985	Heterokaryon incompatibility protein (HET)	346	502	2.9e-11	IPR010730	Heterokaryon incompatibility
N_psidii_MA3_00011	513	Pfam	PF00067	Cytochrome P450	36	460	3.4e-32	IPR001128	Cytochrome P450
N_psidii_MA3_00012	630	Pfam	PF00067	Cytochrome P450	365	616	1.4e-09	IPR001128	Cytochrome P450
N_psidii_MA3_00014	343	Pfam	PF00067	Cytochrome P450	56	294	4.9e-25	IPR001128	Cytochrome P450
N_psidii_MA3_00015	479	Pfam	PF00503	G-protein alpha subunit	165	438	1.5e-29	IPR001019	Guanine nucleotide binding protein (G-protein), alpha subunit
N_psidii_MA3_00016	1205	Pfam	PF04082	Fungal specific transcription factor domain	756	877	5.7e-12	IPR007219	Transcription factor domain, fungi
N_psidii_MA3_00016	1205	Pfam	PF00795	Carbon-nitrogen hydrolase	13	330	2e-40	IPR003010	Carbon-nitrogen hydrolase
N_psidii_MA3_00017	1319	Pfam	PF05378	Hydantoinase/oxoprolinase N-terminal region	13	226	7.2e-59	IPR008040	Hydantoinaseoxoprolinase, N-terminal
N_psidii_MA3_00017	1319	Pfam	PF02538	Hydantoinase B/oxoprolinase	740	1276	8.6e-209	IPR003692	Hydantoinase B/oxoprolinase
N_psidii_MA3_00017	1319	Pfam	PF01968	Hydantoinase/oxoprolinase	245	534	4.8e-92	IPR002821	Hydantoinase A/oxoprolinase
N_psidii_MA3_00018	488	Pfam	PF07690	Major Facilitator Superfamily	51	411	3.6e-35	IPR011701	Major facilitator superfamily
N_psidii_MA3_00019	598	Pfam	PF01565	FAD binding domain	123	272	2.3e-21	IPR006094	FAD linked oxidase, N-terminal
N_psidii_MA3_00019	598	Pfam	PF08031	Berberine and berberine like	534	577	3.2e-14	IPR012951	Berberine/berberine-like
N_psidii_MA3_00022	566	Pfam	PF13640	2OG-Fe(II) oxygenase superfamily	262	354	4.9e-09	IPR005123	Oxoglutarate/iron-dependent dioxygenase
N_psidii_MA3_00024	3028	Pfam	PF16197	Ketoacyl-synthetase C-terminal extension	387	511	5.6e-14	IPR032821	Ketoacyl-synthetase, C-terminal extension
N_psidii_MA3_00024	3028	Pfam	PF08659	KR domain	2215	2393	5.2e-53	IPR013968	Polyketide synthase, ketoreductase domain
N_psidii_MA3_00024	3028	Pfam	PF13602	Zinc-binding dehydrogenase	2052	2190	3.9e-17
N_psidii_MA3_00024	3028	Pfam	PF00550	Phosphopantetheine attachment site	2518	2583	4e-08	IPR009081	Phosphopantetheine binding ACP domain
N_psidii_MA3_00024	3028	Pfam	PF14765	Polyketide synthase dehydratase	952	1262	2e-65	IPR020807	Polyketide synthase, dehydratase domain
N_psidii_MA3_00024	3028	Pfam	PF02801	Beta-ketoacyl synthase, C-terminal domain	266	383	4e-32	IPR014031	Beta-ketoacyl synthase, C-terminal
N_psidii_MA3_00024	3028	Pfam	PF08242	Methyltransferase domain	1463	1574	6.1e-15	IPR013217	Methyltransferase type 12
N_psidii_MA3_00024	3028	Pfam	PF00698	Acyl transferase domain	544	853	2e-48	IPR014043	Acyl transferase
N_psidii_MA3_00024	3028	Pfam	PF00144	Beta-lactamase	2665	3004	3.1e-43	IPR001466	Beta-lactamase-related
N_psidii_MA3_00024	3028	Pfam	PF00109	Beta-ketoacyl synthase, N-terminal domain	7	257	8.7e-64	IPR014030	Beta-ketoacyl synthase, N-terminal
N_psidii_MA3_00027	585	Pfam	PF07690	Major Facilitator Superfamily	75	476	7.1e-46	IPR011701	Major facilitator superfamily
N_psidii_MA3_00028	829	Pfam	PF13489	Methyltransferase domain	116	291	2.6e-11
N_psidii_MA3_00028	829	Pfam	PF11899	Protein of unknown function (DUF3419)	415	805	3.4e-160	IPR021829	Protein of unknown function DUF3419
N_psidii_MA3_00029	220	Pfam	PF00067	Cytochrome P450	81	124	1.8e-09	IPR001128	Cytochrome P450
N_psidii_MA3_00032	463	Pfam	PF12796	Ankyrin repeats (3 copies)	27	111	1e-15	IPR020683	Ankyrin repeat-containing domain
N_psidii_MA3_00033	910	Pfam	PF12796	Ankyrin repeats (3 copies)	837	902	4.8e-10	IPR020683	Ankyrin repeat-containing domain
N_psidii_MA3_00033	910	Pfam	PF12796	Ankyrin repeats (3 copies)	744	831	1.1e-13	IPR020683	Ankyrin repeat-containing domain
N_psidii_MA3_00033	910	Pfam	PF17109	fungal STAND N-terminal Goodbye domain	19	138	1.1e-22	IPR031350	Fungal STAND N-terminal Goodbye domain
N_psidii_MA3_00033	910	Pfam	PF05729	NACHT domain	313	452	2e-06
N_psidii_MA3_00036	398	Pfam	PF06441	Epoxide hydrolase N terminus	15	127	1.3e-30	IPR010497	Epoxide hydrolase, N-terminal
N_psidii_MA3_00037	222	Pfam	PF13489	Methyltransferase domain	10	137	7e-16
N_psidii_MA3_00040	624	Pfam	PF03169	OPT oligopeptide transporter protein	1	581	3.7e-150	IPR004813	Oligopeptide transporter, OPT superfamily
N_psidii_MA3_00041	231	Pfam	PF13640	2OG-Fe(II) oxygenase superfamily	89	158	4.6e-06	IPR005123	Oxoglutarate/iron-dependent dioxygenase
N_psidii_MA3_00042	498	Pfam	PF02225	PA domain	123	207	1.1e-15	IPR003137	PA domain
N_psidii_MA3_00042	498	Pfam	PF04389	Peptidase family M28	233	440	2.8e-38	IPR007484	Peptidase M28
N_psidii_MA3_00043	503	Pfam	PF00150	Cellulase (glycosyl hydrolase family 5)	98	361	2.2e-32	IPR001547	Glycoside hydrolase, family 5
N_psidii_MA3_00045	1633	Pfam	PF05199	GMC oxidoreductase	1280	1420	2.7e-27	IPR007867	Glucose-methanol-choline oxidoreductase, C-terminal
N_psidii_MA3_00045	1633	Pfam	PF00083	Sugar (and other) transporter	55	505	4.5e-76	IPR005828	Major facilitator, sugar transporter-like
N_psidii_MA3_00045	1633	Pfam	PF00732	GMC oxidoreductase	913	1180	2.8e-26	IPR000172	Glucose-methanol-choline oxidoreductase, N-terminal
N_psidii_MA3_00051	463	Pfam	PF01266	FAD dependent oxidoreductase	6	404	5.9e-40	IPR006076	FAD dependent oxidoreductase
N_psidii_MA3_00052	553	Pfam	PF00324	Amino acid permease	53	510	2.4e-104	IPR004841	Amino acid permease/ SLC12A domain
N_psidii_MA3_00053	258	Pfam	PF01070	FMN-dependent dehydrogenase	23	124	6.7e-26	IPR000262	FMN-dependent dehydrogenase
N_psidii_MA3_00055	503	Pfam	PF00171	Aldehyde dehydrogenase family	31	495	4.2e-179	IPR015590	Aldehyde dehydrogenase domain
N_psidii_MA3_00057	1515	Pfam	PF01061	ABC-2 type transporter	1186	1401	5.1e-47	IPR013525	ABC-2 type transporter
N_psidii_MA3_00057	1515	Pfam	PF01061	ABC-2 type transporter	513	723	8.4e-45	IPR013525	ABC-2 type transporter
N_psidii_MA3_00057	1515	Pfam	PF06422	CDR ABC transporter	735	820	1.1e-31	IPR010929	CDR ABC transporter
N_psidii_MA3_00057	1515	Pfam	PF00005	ABC transporter	191	347	8.6e-15	IPR003439	ABC transporter-like
N_psidii_MA3_00057	1515	Pfam	PF00005	ABC transporter	884	1035	2e-16	IPR003439	ABC transporter-like
N_psidii_MA3_00057	1515	Pfam	PF14510	ABC-transporter extracellular N-terminal	85	165	3.6e-16	IPR029481	ABC-transporter N-terminal domain
N_psidii_MA3_00059	455	Pfam	PF01494	FAD binding domain	3	329	7.4e-21	IPR002938	FAD-binding domain
N_psidii_MA3_00065	215	Pfam	PF00583	Acetyltransferase (GNAT) family	91	195	4.9e-09	IPR000182	GNAT domain
N_psidii_MA3_00067	800	Pfam	PF14624	VWA / Hh protein intein-like	508	584	1.4e-28	IPR032838	VWA-Hint protein, Vwaint domain
N_psidii_MA3_00067	800	Pfam	PF00092	von Willebrand factor type A domain	130	306	3.4e-15	IPR002035	von Willebrand factor, type A
N_psidii_MA3_00067	800	Pfam	PF14623	Hint-domain	625	792	3.8e-64
N_psidii_MA3_00068	1044	Pfam	PF00350	Dynamin family	127	394	5.1e-13	IPR022812	Dynamin superfamily
N_psidii_MA3_00072	1621	Pfam	PF12698	ABC-2 family transporter protein	979	1214	6e-12
N_psidii_MA3_00072	1621	Pfam	PF12698	ABC-2 family transporter protein	27	434	4.5e-11
N_psidii_MA3_00072	1621	Pfam	PF00005	ABC transporter	1278	1420	1.5e-26	IPR003439	ABC transporter-like
N_psidii_MA3_00072	1621	Pfam	PF00005	ABC transporter	502	633	1.8e-18	IPR003439	ABC transporter-like
N_psidii_MA3_00074	821	Pfam	PF10405	Rad4 beta-hairpin domain 3	659	731	2.5e-27	IPR018328	Rad4 beta-hairpin domain 3
N_psidii_MA3_00074	821	Pfam	PF10403	Rad4 beta-hairpin domain 1	534	589	1.3e-22	IPR018326	Rad4 beta-hairpin domain 1
N_psidii_MA3_00074	821	Pfam	PF03835	Rad4 transglutaminase-like domain	414	528	2.7e-31	IPR018325	Rad4/PNGase transglutaminase-like fold
N_psidii_MA3_00074	821	Pfam	PF10404	Rad4 beta-hairpin domain 2	593	652	2.3e-21	IPR018327	Rad4 beta-hairpin domain 2
N_psidii_MA3_00075	464	Pfam	PF04082	Fungal specific transcription factor domain	35	264	9.4e-18	IPR007219	Transcription factor domain, fungi
N_psidii_MA3_00078	638	Pfam	PF07504	Fungalysin/Thermolysin Propeptide Motif	84	135	8.5e-19	IPR011096	FTP domain
N_psidii_MA3_00078	638	Pfam	PF02128	Fungalysin metallopeptidase (M36)	250	621	8.4e-157	IPR001842	Peptidase M36, fungalysin
N_psidii_MA3_00079	176	Pfam	PF04828	Glutathione-dependent formaldehyde-activating enzyme	87	151	5.8e-09	IPR006913	Glutathione-dependent formaldehyde-activating enzyme/centromere protein V
N_psidii_MA3_00080	311	Pfam	PF00704	Glycosyl hydrolases family 18	20	231	1.9e-15	IPR001223	Glycoside hydrolase family 18, catalytic domain
N_psidii_MA3_00082	573	Pfam	PF13339	Apoptosis antagonizing transcription factor	277	393	1.2e-27	IPR025160	AATF leucine zipper-containing domain
N_psidii_MA3_00082	573	Pfam	PF08164	Apoptosis-antagonizing transcription factor, C-terminal	459	542	3.9e-29	IPR012617	Apoptosis-antagonizing transcription factor, C-terminal
N_psidii_MA3_00083	312	Pfam	PF10609	NUBPL iron-transfer P-loop NTPase	80	303	2.4e-81	IPR033756	Flagellum site-determining protein YlxH/ Fe-S cluster assembling factor NBP35
N_psidii_MA3_00088	688	Pfam	PF03109	ABC1 family	228	257	1e-05	IPR004147	UbiB domain
N_psidii_MA3_00088	688	Pfam	PF03109	ABC1 family	297	378	3.5e-12	IPR004147	UbiB domain
N_psidii_MA3_00089	322	Pfam	PF01265	Cytochrome c/c1 heme lyase	1	296	1.4e-125	IPR000511	Cytochrome c/c1 haem-lyase
N_psidii_MA3_00094	437	Pfam	PF00929	Exonuclease	178	351	2.3e-23	IPR013520	Exonuclease, RNase T/DNA polymerase III
N_psidii_MA3_00094	437	Pfam	PF13423	Ubiquitin carboxyl-terminal hydrolase	3	102	7.7e-08	IPR028881	PAN2 domain
N_psidii_MA3_00095	649	Pfam	PF13423	Ubiquitin carboxyl-terminal hydrolase	488	644	3.5e-31	IPR028881	PAN2 domain
N_psidii_MA3_00096	276	Pfam	PF13649	Methyltransferase domain	94	195	2.4e-06
N_psidii_MA3_00097	601	Pfam	PF00069	Protein kinase domain	32	307	3.2e-41	IPR000719	Protein kinase domain
N_psidii_MA3_00098	754	Pfam	PF00172	Fungal Zn(2)-Cys(6) binuclear cluster domain	198	240	1.4e-08	IPR001138	Zn(2)-C6 fungal-type DNA-binding domain
N_psidii_MA3_00100	430	Pfam	PF00649	Copper fist DNA binding domain	1	39	4.1e-22	IPR001083	Copper fist DNA-binding domain
N_psidii_MA3_00105	353	Pfam	PF08546	Ketopantoate reductase PanE/ApbA C terminal	213	338	5.5e-24	IPR013752	Ketopantoate reductase, C-terminal domain
N_psidii_MA3_00105	353	Pfam	PF02558	Ketopantoate reductase PanE/ApbA	10	170	1.4e-31	IPR013332	Ketopantoate reductase, N-terminal domain
N_psidii_MA3_00106	1921	Pfam	PF01590	GAF domain	476	635	2e-10	IPR003018	GAF domain
N_psidii_MA3_00106	1921	Pfam	PF08446	PAS fold	276	353	2e-09	IPR013654	PAS fold-2
N_psidii_MA3_00106	1921	Pfam	PF00360	Phytochrome region	655	821	8.3e-27	IPR013515	Phytochrome, central region
N_psidii_MA3_00106	1921	Pfam	PF02518	Histidine kinase-, DNA gyrase B-, and HSP90-like ATPase	956	1081	1.6e-15	IPR003594	Histidine kinase/HSP90-like ATPase
N_psidii_MA3_00106	1921	Pfam	PF00512	His Kinase A (phospho-acceptor) domain	847	909	2.6e-12	IPR003661	Signal transduction histidine kinase, dimerisation/phosphoacceptor domain
N_psidii_MA3_00106	1921	Pfam	PF00072	Response regulator receiver domain	1316	1441	1.2e-16	IPR001789	Signal transduction response regulator, receiver domain
N_psidii_MA3_00108	352	Pfam	PF01214	Casein kinase II regulatory subunit	10	257	3.5e-75	IPR000704	Casein kinase II, regulatory subunit
N_psidii_MA3_00109	340	Pfam	PF13621	Cupin-like domain	171	340	5.6e-25
N_psidii_MA3_00110	957	Pfam	PF05508	RanGTP-binding protein	1	365	1.5e-108	IPR008812	GTP-binding nuclear protein Ran-related
N_psidii_MA3_00111	711	Pfam	PF00009	Elongation factor Tu GTP binding domain	277	493	1.8e-43	IPR000795	Transcription factor, GTP-binding domain
N_psidii_MA3_00111	711	Pfam	PF03143	Elongation factor Tu C-terminal domain	597	705	1.4e-27	IPR004160	Translation elongation factor EFTu/EF1A, C-terminal
N_psidii_MA3_00112	589	Pfam	PF01293	Phosphoenolpyruvate carboxykinase	75	541	6.7e-217	IPR001272	Phosphoenolpyruvate carboxykinase, ATP-utilising
N_psidii_MA3_00113	1136	Pfam	PF00176	SNF2 family N-terminal domain	288	600	1e-66	IPR000330	SNF2-related, N-terminal domain
N_psidii_MA3_00113	1136	Pfam	PF00271	Helicase conserved C-terminal domain	917	1027	3.8e-16	IPR001650	Helicase, C-terminal
N_psidii_MA3_00114	649	Pfam	PF03127	GAT domain	297	368	2.3e-10	IPR004152	GAT domain
N_psidii_MA3_00114	649	Pfam	PF00790	VHS domain	9	140	2.7e-35	IPR002014	VHS domain
N_psidii_MA3_00114	649	Pfam	PF00018	SH3 domain	223	267	1.8e-15	IPR001452	SH3 domain
N_psidii_MA3_00116	936	Pfam	PF10033	Autophagy-related protein 13	75	314	1.9e-73	IPR018731	Autophagy-related protein 13
N_psidii_MA3_00118	1597	Pfam	PF13637	Ankyrin repeats (many copies)	94	151	5.3e-08
N_psidii_MA3_00118	1597	Pfam	PF00651	BTB/POZ domain	902	1017	1.5e-09	IPR000210	BTB/POZ domain
N_psidii_MA3_00118	1597	Pfam	PF13540	Regulator of chromosome condensation (RCC1) repeat	363	392	4.8e-06
N_psidii_MA3_00120	299	Pfam	PF00153	Mitochondrial carrier protein	203	296	3.4e-19	IPR018108	Mitochondrial substrate/solute carrier
N_psidii_MA3_00120	299	Pfam	PF00153	Mitochondrial carrier protein	112	196	8.2e-19	IPR018108	Mitochondrial substrate/solute carrier
N_psidii_MA3_00120	299	Pfam	PF00153	Mitochondrial carrier protein	7	100	2.6e-26	IPR018108	Mitochondrial substrate/solute carrier
N_psidii_MA3_00123	554	Pfam	PF01417	ENTH domain	15	139	1.5e-49	IPR013809	ENTH domain
N_psidii_MA3_00124	202	Pfam	PF13833	EF-hand domain pair	147	200	1.3e-11	IPR002048	EF-hand domain
N_psidii_MA3_00125	1961	Pfam	PF13634	Nucleoporin FG repeat region	34	129	0.14	IPR025574	Nucleoporin FG repeat
N_psidii_MA3_00125	1961	Pfam	PF13634	Nucleoporin FG repeat region	354	447	0.16	IPR025574	Nucleoporin FG repeat
N_psidii_MA3_00125	1961	Pfam	PF13634	Nucleoporin FG repeat region	260	344	0.018	IPR025574	Nucleoporin FG repeat
N_psidii_MA3_00125	1961	Pfam	PF13634	Nucleoporin FG repeat region	481	560	6.2e-10	IPR025574	Nucleoporin FG repeat
N_psidii_MA3_00125	1961	Pfam	PF04096	Nucleoporin autopeptidase	901	1038	4.6e-43	IPR007230	Peptidase S59, nucleoporin
N_psidii_MA3_00125	1961	Pfam	PF12110	Nuclear protein 96	1494	1791	4.5e-94	IPR021967	Nuclear protein 96
N_psidii_MA3_00127	586	Pfam	PF04616	Glycosyl hydrolases family 43	35	329	3.2e-69	IPR006710	Glycoside hydrolase, family 43
N_psidii_MA3_00130	1215	Pfam	PF01853	MOZ/SAS family	711	889	1.1e-75	IPR002717	Histone acetyltransferase domain, MYST-type
N_psidii_MA3_00131	56	Pfam	PF15879	NADH-ubiquinone oxidoreductase MWFE subunit	1	32	5.8e-14	IPR017384	NADH dehydrogenase [ubiquinone] (complex I), alpha subcomplex subunit 1
N_psidii_MA3_00132	390	Pfam	PF16503	Zinc-ribbon	358	388	2.5e-16	IPR032442	Cytoplasmic tRNA 2-thiolation protein 1, C-terminal
N_psidii_MA3_00132	390	Pfam	PF01171	PP-loop family	54	233	7.2e-19	IPR011063	tRNA(Ile)-lysidine/2-thiocytidine synthase, N-terminal
N_psidii_MA3_00133	267	Pfam	PF01248	Ribosomal protein L7Ae/L30e/S12e/Gadd45 family	127	218	9.4e-22	IPR004038	Ribosomal protein L7Ae/L30e/S12e/Gadd45
N_psidii_MA3_00134	245	Pfam	PF00484	Carbonic anhydrase	53	204	2e-42	IPR001765	Carbonic anhydrase
N_psidii_MA3_00135	125	Pfam	PF02136	Nuclear transport factor 2 (NTF2) domain	8	121	1.5e-31	IPR002075	Nuclear transport factor 2
N_psidii_MA3_00139	329	Pfam	PF06775	Putative adipose-regulatory protein (Seipin)	12	192	2.2e-46	IPR009617	Seipin family
N_psidii_MA3_00140	1309	Pfam	PF00611	Fes/CIP4, and EFC/F-BAR homology domain	26	98	3.1e-17	IPR001060	FCH domain
N_psidii_MA3_00140	1309	Pfam	PF00018	SH3 domain	1255	1303	1.3e-12	IPR001452	SH3 domain
N_psidii_MA3_00141	2187	Pfam	PF16417	CCR4-NOT transcription complex subunit 1 TTP binding domain	704	852	6e-43	IPR032193	CCR4-NOT transcription complex subunit 1, TTP binding domain
N_psidii_MA3_00141	2187	Pfam	PF16415	CCR4-NOT transcription complex subunit 1 CAF1-binding domain	920	1139	5.8e-91	IPR032191	CCR4-NOT transcription complex subunit 1, CAF1-binding domain
N_psidii_MA3_00141	2187	Pfam	PF16418	CCR4-NOT transcription complex subunit 1 HEAT repeat	517	665	9.2e-39	IPR032194	CCR4-NOT transcription complex subunit 1, HEAT repeat
N_psidii_MA3_00141	2187	Pfam	PF12842	Domain of unknown function (DUF3819)	1201	1339	1.3e-49	IPR024557	CCR4-Not complex, Not1 subunit, domain of unknown function DUF3819
N_psidii_MA3_00141	2187	Pfam	PF04054	CCR4-Not complex component, Not1	1817	2183	5.7e-123	IPR007196	CCR4-Not complex component, Not1, C-terminal
N_psidii_MA3_00142	381	Pfam	PF02567	Phenazine biosynthesis-like protein	8	313	6.3e-33	IPR003719	Phenazine biosynthesis PhzF protein
N_psidii_MA3_00145	411	Pfam	PF13489	Methyltransferase domain	156	376	3.1e-16
N_psidii_MA3_00146	492	Pfam	PF01205	Uncharacterized protein family UPF0029	245	353	1.2e-25	IPR001498	Impact, N-terminal
N_psidii_MA3_00147	326	Pfam	PF00069	Protein kinase domain	4	307	8.4e-71	IPR000719	Protein kinase domain
N_psidii_MA3_00151	376	Pfam	PF00134	Cyclin, N-terminal domain	79	183	4.3e-14	IPR006671	Cyclin, N-terminal
N_psidii_MA3_00152	1124	Pfam	PF00122	E1-E2 ATPase	535	734	3e-52
N_psidii_MA3_00152	1124	Pfam	PF00702	haloacid dehalogenase-like hydrolase	751	998	2.3e-34
N_psidii_MA3_00152	1124	Pfam	PF00403	Heavy-metal-associated domain	195	255	4e-12	IPR006121	Heavy metal-associated domain, HMA
N_psidii_MA3_00154	498	Pfam	PF00375	Sodium:dicarboxylate symporter family	66	466	1.2e-86	IPR001991	Sodium:dicarboxylate symporter
N_psidii_MA3_00155	1055	Pfam	PF17147	Pyruvate:ferredoxin oxidoreductase core domain II	274	332	7.2e-08	IPR033412	Pyruvate:ferredoxin oxidoreductase, core domain II
N_psidii_MA3_00155	1055	Pfam	PF01558	Pyruvate ferredoxin/flavodoxin oxidoreductase	439	543	5.8e-10	IPR019752	Pyruvate/ketoisovalerate oxidoreductase, catalytic domain
N_psidii_MA3_00155	1055	Pfam	PF00175	Oxidoreductase NAD-binding domain	909	1009	2e-08	IPR001433	Oxidoreductase FAD/NAD(P)-binding
N_psidii_MA3_00155	1055	Pfam	PF00667	FAD binding domain	664	876	8.4e-65	IPR003097	FAD-binding, type 1
N_psidii_MA3_00156	190	Pfam	PF13673	Acetyltransferase (GNAT) domain	49	172	1.4e-12	IPR000182	GNAT domain
N_psidii_MA3_00157	252	Pfam	PF04299	Putative FMN-binding domain	1	203	3.1e-58	IPR007396	Transcriptional regulator PAI 2-type
N_psidii_MA3_00158	1072	Pfam	PF09759	Spinocerebellar ataxia type 10 protein domain	948	1011	1.7e-10	IPR019156	Ataxin-10 domain
N_psidii_MA3_00159	307	Pfam	PF01048	Phosphorylase superfamily	14	255	2.8e-38	IPR000845	Nucleoside phosphorylase domain
N_psidii_MA3_00162	118	Pfam	PF10017	Histidine-specific methyltransferase, SAM-dependent	32	101	1e-16	IPR019257	Histidine-specific methyltransferase, SAM-dependent
N_psidii_MA3_00163	179	Pfam	PF10017	Histidine-specific methyltransferase, SAM-dependent	3	173	6.1e-44	IPR019257	Histidine-specific methyltransferase, SAM-dependent
N_psidii_MA3_00164	654	Pfam	PF11951	Fungal specific transcription factor domain	226	615	3e-25	IPR021858	Fungal transcription factor
N_psidii_MA3_00169	481	Pfam	PF00172	Fungal Zn(2)-Cys(6) binuclear cluster domain	293	327	4.6e-08	IPR001138	Zn(2)-C6 fungal-type DNA-binding domain
N_psidii_MA3_00171	687	Pfam	PF07731	Multicopper oxidase	508	651	5.8e-33	IPR011706	Multicopper oxidase, type 2
N_psidii_MA3_00171	687	Pfam	PF00394	Multicopper oxidase	266	427	9.4e-29	IPR001117	Multicopper oxidase, type 1
N_psidii_MA3_00171	687	Pfam	PF07732	Multicopper oxidase	144	254	4.5e-40	IPR011707	Multicopper oxidase, type 3
N_psidii_MA3_00172	425	Pfam	PF04185	Phosphoesterase family	90	318	3.6e-31	IPR007312	Phosphoesterase
N_psidii_MA3_00173	268	Pfam	PF01988	VIT family	13	257	4.4e-66	IPR008217	Ccc1 family
N_psidii_MA3_00174	209	Pfam	PF13302	Acetyltransferase (GNAT) domain	26	178	5.5e-26	IPR000182	GNAT domain
N_psidii_MA3_00176	468	Pfam	PF00346	Respiratory-chain NADH dehydrogenase, 49 Kd subunit	198	468	8.1e-124	IPR001135	NADH-quinone oxidoreductase, subunit D
N_psidii_MA3_00177	489	Pfam	PF01494	FAD binding domain	40	433	1.4e-21	IPR002938	FAD-binding domain
N_psidii_MA3_00178	686	Pfam	PF09402	Man1-Src1p-C-terminal domain	305	642	1e-116	IPR018996	Man1-Src1p-C-terminal domain
N_psidii_MA3_00178	686	Pfam	PF12949	HeH/LEM domain	14	48	6.7e-15	IPR025856	HeH/LEM domain
N_psidii_MA3_00179	241	Pfam	PF05405	Mitochondrial ATP synthase B chain precursor (ATP-synt_B)	72	234	1.9e-54	IPR008688	ATP synthase, F0 complex, subunit B/MI25
N_psidii_MA3_00180	558	Pfam	PF03914	CBF/Mak21 family	324	480	6.1e-34	IPR005612	CCAAT-binding factor
N_psidii_MA3_00181	838	Pfam	PF01544	CorA-like Mg2+ transporter protein	511	829	6.4e-38	IPR002523	Mg2+ transporter protein, CorA-like/Zinc transport protein ZntB
N_psidii_MA3_00183	439	Pfam	PF14304	Transcription termination and cleavage factor C-terminal	401	431	3.4e-10	IPR026896	Transcription termination and cleavage factor, C-terminal domain
N_psidii_MA3_00183	439	Pfam	PF00076	RNA recognition motif. (a.k.a. RRM, RBD, or RNP domain)	141	211	9.9e-21	IPR000504	RNA recognition motif domain
N_psidii_MA3_00183	439	Pfam	PF14327	Hinge domain of cleavage stimulation factor subunit 2	253	333	1.2e-32	IPR025742	Cleavage stimulation factor subunit 2, hinge domain
N_psidii_MA3_00184	439	Pfam	PF13850	Endoplasmic Reticulum-Golgi Intermediate Compartment (ERGIC)	7	96	1.1e-30
N_psidii_MA3_00184	439	Pfam	PF07970	Endoplasmic reticulum vesicle transporter	141	421	1.6e-87	IPR012936	Endoplasmic reticulum vesicle transporter, C-terminal
N_psidii_MA3_00186	752	Pfam	PF08238	Sel1 repeat	675	708	0.52	IPR006597	Sel1-like repeat
N_psidii_MA3_00186	752	Pfam	PF08238	Sel1 repeat	576	606	0.017	IPR006597	Sel1-like repeat
N_psidii_MA3_00186	752	Pfam	PF08238	Sel1 repeat	639	668	0.0077	IPR006597	Sel1-like repeat
N_psidii_MA3_00187	271	Pfam	PF12465	Proteasome beta subunits C terminal	221	255	8.1e-13	IPR024689	Proteasome beta subunit, C-terminal
N_psidii_MA3_00187	271	Pfam	PF00227	Proteasome subunit	27	207	4.9e-46	IPR001353	Proteasome, subunit alpha/beta
N_psidii_MA3_00189	381	Pfam	PF01000	RNA polymerase Rpb3/RpoA insert domain	102	247	2.6e-24	IPR011262	DNA-directed RNA polymerase, insert domain
N_psidii_MA3_00189	381	Pfam	PF01193	RNA polymerase Rpb3/Rpb11 dimerisation domain	72	369	2.2e-20	IPR011263	DNA-directed RNA polymerase, RpoA/D/Rpb3-type
N_psidii_MA3_00190	438	Pfam	PF08825	E2 binding domain	353	434	2.9e-31	IPR014929	E2 binding
N_psidii_MA3_00190	438	Pfam	PF00899	ThiF family	41	321	4e-66	IPR000594	THIF-type NAD/FAD binding fold
N_psidii_MA3_00191	702	Pfam	PF10193	Telomere length regulation protein	318	429	3.8e-35	IPR019337	Telomere length regulation protein, conserved domain
N_psidii_MA3_00192	811	Pfam	PF00069	Protein kinase domain	44	310	3.2e-56	IPR000719	Protein kinase domain
N_psidii_MA3_00193	679	Pfam	PF11710	G protein-coupled glucose receptor regulating Gpa2	207	473	1.2e-18	IPR023041	Glucose receptor Git3, N-terminal
N_psidii_MA3_00195	850	Pfam	PF07522	DNA repair metallo-beta-lactamase	662	795	6.1e-35	IPR011084	DNA repair metallo-beta-lactamase
N_psidii_MA3_00195	850	Pfam	PF12706	Beta-lactamase superfamily domain	402	525	1.1e-06	IPR001279	Metallo-beta-lactamase
N_psidii_MA3_00196	98	Pfam	PF01423	LSM domain	6	71	3.5e-18	IPR001163	LSM domain, eukaryotic/archaea-type
N_psidii_MA3_00197	839	Pfam	PF10557	Cullin protein neddylation domain	768	828	2.6e-26	IPR019559	Cullin protein, neddylation domain
N_psidii_MA3_00197	839	Pfam	PF00888	Cullin family	37	733	1.1e-194	IPR001373	Cullin, N-terminal
N_psidii_MA3_00198	119	Pfam	PF01423	LSM domain	5	69	3e-17	IPR001163	LSM domain, eukaryotic/archaea-type
N_psidii_MA3_00204	315	Pfam	PF02045	CCAAT-binding transcription factor (CBF-B/NF-YA) subunit B	191	246	5.9e-28	IPR001289	Nuclear transcription factor Y subunit A
N_psidii_MA3_00205	367	Pfam	PF01636	Phosphotransferase enzyme family	31	267	6.2e-44	IPR002575	Aminoglycoside phosphotransferase
N_psidii_MA3_00207	123	Pfam	PF05186	Dpy-30 motif	100	123	2.2e-05	IPR007858	Dpy-30 motif
N_psidii_MA3_00208	151	Pfam	PF00312	Ribosomal protein S15	74	146	4.3e-16	IPR000589	Ribosomal protein S15
N_psidii_MA3_00208	151	Pfam	PF08069	Ribosomal S13/S15 N-terminal domain	1	60	1.3e-30	IPR012606	Ribosomal protein S13/S15, N-terminal
N_psidii_MA3_00209	553	Pfam	PF00076	RNA recognition motif. (a.k.a. RRM, RBD, or RNP domain)	478	538	2.8e-07	IPR000504	RNA recognition motif domain
N_psidii_MA3_00209	553	Pfam	PF00076	RNA recognition motif. (a.k.a. RRM, RBD, or RNP domain)	348	418	4.1e-12	IPR000504	RNA recognition motif domain
N_psidii_MA3_00210	395	Pfam	PF07934	8-oxoguanine DNA glycosylase, N-terminal domain	19	115	8.3e-22	IPR012904	8-oxoguanine DNA glycosylase, N-terminal
N_psidii_MA3_00210	395	Pfam	PF00730	HhH-GPD superfamily base excision DNA repair protein	116	276	1.5e-15	IPR003265	HhH-GPD domain
N_psidii_MA3_00211	1213	Pfam	PF08920	Splicing factor 3B subunit 1	237	357	1.8e-28	IPR015016	Splicing factor 3B subunit 1
N_psidii_MA3_00214	354	Pfam	PF12874	Zinc-finger of C2H2 type	287	309	3.3e-06
N_psidii_MA3_00214	354	Pfam	PF00096	Zinc finger, C2H2 type	314	338	0.0019
N_psidii_MA3_00218	1227	Pfam	PF12768	Cortical protein marker for cell polarity	1001	1210	5.8e-76	IPR024982	Rax2
N_psidii_MA3_00219	264	Pfam	PF00565	Staphylococcal nuclease homologue	130	239	4.1e-25	IPR016071	Staphylococcal nuclease (SNase-like), OB-fold
N_psidii_MA3_00220	319	Pfam	PF04045	Arp2/3 complex, 34 kD subunit p34-Arc	52	301	8.1e-105	IPR007188	Actin-related protein 2/3 complex subunit 2
N_psidii_MA3_00221	1008	Pfam	PF00400	WD domain, G-beta repeat	649	680	0.0012	IPR001680	WD40 repeat
N_psidii_MA3_00221	1008	Pfam	PF00400	WD domain, G-beta repeat	734	770	3.3e-07	IPR001680	WD40 repeat
N_psidii_MA3_00221	1008	Pfam	PF00400	WD domain, G-beta repeat	548	582	1.3e-05	IPR001680	WD40 repeat
N_psidii_MA3_00221	1008	Pfam	PF00400	WD domain, G-beta repeat	468	500	7.7e-05	IPR001680	WD40 repeat
N_psidii_MA3_00221	1008	Pfam	PF00400	WD domain, G-beta repeat	151	184	0.00011	IPR001680	WD40 repeat
N_psidii_MA3_00221	1008	Pfam	PF00400	WD domain, G-beta repeat	687	728	0.031	IPR001680	WD40 repeat
N_psidii_MA3_00221	1008	Pfam	PF04003	Dip2/Utp12 Family	873	973	1.1e-18	IPR007148	Small-subunit processome, Utp12
N_psidii_MA3_00223	244	Pfam	PF01557	Fumarylacetoacetate (FAA) hydrolase family	23	216	1.1e-51	IPR011234	Fumarylacetoacetase-like, C-terminal
N_psidii_MA3_00224	180	Pfam	PF06052	3-hydroxyanthranilic acid dioxygenase	3	149	2.7e-65	IPR010329	3-hydroxyanthranilic acid dioxygenase
N_psidii_MA3_00225	162	Pfam	PF04145	Ctr copper transporter family	34	149	4.2e-29	IPR007274	Ctr copper transporter
N_psidii_MA3_00226	247	Pfam	PF00293	NUDIX domain	7	43	1.3e-06	IPR000086	NUDIX hydrolase domain
N_psidii_MA3_00229	405	Pfam	PF03124	EXS family	18	380	3.2e-115	IPR004342	EXS, C-terminal
N_psidii_MA3_00236	684	Pfam	PF00172	Fungal Zn(2)-Cys(6) binuclear cluster domain	53	87	2.2e-08	IPR001138	Zn(2)-C6 fungal-type DNA-binding domain
N_psidii_MA3_00236	684	Pfam	PF11951	Fungal specific transcription factor domain	283	684	2.6e-82	IPR021858	Fungal transcription factor
N_psidii_MA3_00239	795	Pfam	PF07647	SAM domain (Sterile alpha motif)	193	238	4.3e-06	IPR001660	Sterile alpha motif domain
N_psidii_MA3_00240	281	Pfam	PF02777	Iron/manganese superoxide dismutases, C-terminal domain	123	268	2.3e-11	IPR019832	Manganese/iron superoxide dismutase, C-terminal
N_psidii_MA3_00241	396	Pfam	PF12400	STIMATE family	163	290	2.6e-41	IPR022127	Store-operated calcium entry regulator STIMATE/YPL162C
N_psidii_MA3_00243	340	Pfam	PF12273	Chitin synthesis regulation, resistance to Congo red	140	263	1.3e-10	IPR020999	Chitin synthesis regulation, Congo red resistance, RCR protein
N_psidii_MA3_00245	299	Pfam	PF12710	haloacid dehalogenase-like hydrolase	8	189	6.6e-21
N_psidii_MA3_00247	155	Pfam	PF08523	Multiprotein bridging factor 1	4	79	4.3e-25	IPR013729	Multiprotein bridging factor 1, N-terminal
N_psidii_MA3_00247	155	Pfam	PF01381	Helix-turn-helix	88	140	1.2e-11	IPR001387	Cro/C1-type helix-turn-helix domain
N_psidii_MA3_00249	137	Pfam	PF04828	Glutathione-dependent formaldehyde-activating enzyme	27	118	2.9e-24	IPR006913	Glutathione-dependent formaldehyde-activating enzyme/centromere protein V
N_psidii_MA3_00251	578	Pfam	PF08032	RNA 2'-O ribose methyltransferase substrate binding	251	331	1.1e-09	IPR013123	RNA 2-O ribose methyltransferase, substrate binding
N_psidii_MA3_00251	578	Pfam	PF00588	SpoU rRNA Methylase family	382	541	8.9e-25	IPR001537	tRNA/rRNA methyltransferase, SpoU type
N_psidii_MA3_00252	1610	Pfam	PF15446	PHD/FYVE-zinc-finger like domain	409	572	6.2e-72
N_psidii_MA3_00252	1610	Pfam	PF00176	SNF2 family N-terminal domain	788	1065	3.9e-48	IPR000330	SNF2-related, N-terminal domain
N_psidii_MA3_00252	1610	Pfam	PF00271	Helicase conserved C-terminal domain	1093	1203	1.7e-17	IPR001650	Helicase, C-terminal
N_psidii_MA3_00257	278	Pfam	PF06687	SUR7/PalI family	11	230	1.3e-30	IPR009571	Membrane protein SUR7/Rim9-like, fungi
N_psidii_MA3_00260	865	Pfam	PF11915	Protein of unknown function (DUF3433)	356	445	1.3e-21	IPR021840	Protein of unknown function DUF3433
N_psidii_MA3_00260	865	Pfam	PF11915	Protein of unknown function (DUF3433)	619	701	1.7e-16	IPR021840	Protein of unknown function DUF3433
N_psidii_MA3_00264	749	Pfam	PF14558	ML-like domain	28	164	5.3e-42	IPR032800	ML-like domain
N_psidii_MA3_00264	749	Pfam	PF06011	Transient receptor potential (TRP) ion channel	169	615	4.3e-161	IPR010308	TRP-like family
N_psidii_MA3_00272	434	Pfam	PF01987	Mitochondrial biogenesis AIM24	221	418	2.2e-51	IPR002838	Mitochondrial biogenesis protein AIM24
N_psidii_MA3_00283	121	Pfam	PF00173	Cytochrome b5-like Heme/Steroid binding domain	23	87	5.1e-13	IPR001199	Cytochrome b5-like heme/steroid binding domain
N_psidii_MA3_00285	498	Pfam	PF04098	Rad52/22 family double-strand break repair protein	29	178	8.2e-59	IPR007232	DNA repair protein Rad52/59/22
N_psidii_MA3_00286	302	Pfam	PF08559	Cut8, nuclear proteasome tether protein	36	264	1.7e-76	IPR013868	Tethering factor for nuclear proteasome Cut8/Sts1
N_psidii_MA3_00288	430	Pfam	PF00076	RNA recognition motif. (a.k.a. RRM, RBD, or RNP domain)	220	277	3.4e-10	IPR000504	RNA recognition motif domain
N_psidii_MA3_00294	182	Pfam	PF04061	ORMDL family	38	172	4.5e-58	IPR007203	ORMDL family
N_psidii_MA3_00296	242	Pfam	PF01596	O-methyltransferase	48	239	1.4e-33	IPR002935	O-methyltransferase, family 3
N_psidii_MA3_00297	233	Pfam	PF06687	SUR7/PalI family	11	187	8.6e-18	IPR009571	Membrane protein SUR7/Rim9-like, fungi
N_psidii_MA3_00299	678	Pfam	PF10744	Mediator of RNA polymerase II transcription subunit 1	120	539	6e-125	IPR019680	Mediator complex, subunit Med1
N_psidii_MA3_00300	736	Pfam	PF00722	Glycosyl hydrolases family 16	69	164	4.4e-07	IPR000757	Glycoside hydrolase family 16
N_psidii_MA3_00303	372	Pfam	PF00551	Formyl transferase	36	215	8.8e-22	IPR002376	Formyl transferase, N-terminal
N_psidii_MA3_00304	207	Pfam	PF04252	Predicted SAM-dependent RNA methyltransferase	8	201	1.7e-84	IPR007364	RNA methyltransferase TK0422/Sfm1
N_psidii_MA3_00305	614	Pfam	PF00450	Serine carboxypeptidase	41	460	2.3e-115	IPR001563	Peptidase S10, serine carboxypeptidase
N_psidii_MA3_00306	885	Pfam	PF13417	Glutathione S-transferase, N-terminal domain	551	624	6.8e-08	IPR004045	Glutathione S-transferase, N-terminal
N_psidii_MA3_00306	885	Pfam	PF00098	Zinc knuckle	298	314	2.5e-06	IPR001878	Zinc finger, CCHC-type
N_psidii_MA3_00306	885	Pfam	PF00098	Zinc knuckle	100	115	3.9e-05	IPR001878	Zinc finger, CCHC-type
N_psidii_MA3_00306	885	Pfam	PF00098	Zinc knuckle	121	135	0.00032	IPR001878	Zinc finger, CCHC-type
N_psidii_MA3_00306	885	Pfam	PF00098	Zinc knuckle	345	361	3.1e-06	IPR001878	Zinc finger, CCHC-type
N_psidii_MA3_00306	885	Pfam	PF00098	Zinc knuckle	79	94	0.0018	IPR001878	Zinc finger, CCHC-type
N_psidii_MA3_00306	885	Pfam	PF00098	Zinc knuckle	365	382	7.4e-07	IPR001878	Zinc finger, CCHC-type
N_psidii_MA3_00306	885	Pfam	PF00098	Zinc knuckle	321	335	0.0028	IPR001878	Zinc finger, CCHC-type
N_psidii_MA3_00306	885	Pfam	PF00098	Zinc knuckle	390	406	1e-05	IPR001878	Zinc finger, CCHC-type
N_psidii_MA3_00306	885	Pfam	PF14392	Zinc knuckle	270	285	1.4	IPR025836	Zinc knuckle CX2CX4HX4C
N_psidii_MA3_00306	885	Pfam	PF14392	Zinc knuckle	415	429	4.7	IPR025836	Zinc knuckle CX2CX4HX4C
N_psidii_MA3_00310	539	Pfam	PF11787	Aft1 HRR domain	196	290	8.3e-28	IPR021756	Transcription factor Aft1, HRR domain
N_psidii_MA3_00310	539	Pfam	PF00170	bZIP transcription factor	426	482	1.5e-12	IPR004827	Basic-leucine zipper domain
N_psidii_MA3_00310	539	Pfam	PF11786	Aft1 HRA domain	119	190	1.1e-24	IPR021755	Transcription factor Aft1, HRA domain
N_psidii_MA3_00310	539	Pfam	PF11785	Aft1 osmotic stress response (OSM) domain	44	96	1.8e-23	IPR020956	Transcription factor Aft1, osmotic stress domain
N_psidii_MA3_00312	519	Pfam	PF08202	Mis12-Mtw1 protein family	221	511	2.5e-60	IPR013218	Kinetochore-associated protein Dsn1/Mis13
N_psidii_MA3_00313	334	Pfam	PF03937	Flavinator of succinate dehydrogenase	184	243	9.3e-24	IPR005631	Flavinator of succinate dehydrogenase
N_psidii_MA3_00314	220	Pfam	PF01105	emp24/gp25L/p24 family/GOLD	36	215	6.2e-41	IPR009038	GOLD domain
N_psidii_MA3_00315	246	Pfam	PF06220	U1 zinc finger	48	85	1.3e-21	IPR013085	U1-C, C2H2-type zinc finger
N_psidii_MA3_00319	176	Pfam	PF00646	F-box domain	4	32	0.00029	IPR001810	F-box domain
N_psidii_MA3_00320	210	Pfam	PF01966	HD domain	33	140	2.2e-05	IPR006674	HD domain
N_psidii_MA3_00323	346	Pfam	PF04909	Amidohydrolase	98	346	2.6e-25	IPR006680	Amidohydrolase-related
N_psidii_MA3_00324	684	Pfam	PF12709	Central kinetochore-associated	455	508	1e-10	IPR024312	TACC protein, fungi
N_psidii_MA3_00331	341	Pfam	PF16589	BRCT domain, a BRCA1 C-terminus domain	222	320	3e-07	IPR001357	BRCT domain
N_psidii_MA3_00333	701	Pfam	PF00501	AMP-binding enzyme	77	545	1.7e-70	IPR000873	AMP-dependent synthetase/ligase
N_psidii_MA3_00333	701	Pfam	PF13193	AMP-binding enzyme C-terminal domain	555	638	1.4e-15	IPR025110	AMP-binding enzyme, C-terminal domain
N_psidii_MA3_00333	701	Pfam	PF16177	Acetyl-coenzyme A synthetase N-terminus	10	71	6.7e-18	IPR032387	Acetyl-coenzyme A synthetase, N-terminal domain
N_psidii_MA3_00337	345	Pfam	PF08240	Alcohol dehydrogenase GroES-like domain	44	103	1.4e-07	IPR013154	Alcohol dehydrogenase, N-terminal
N_psidii_MA3_00337	345	Pfam	PF00107	Zinc-binding dehydrogenase	168	289	9.7e-27	IPR013149	Alcohol dehydrogenase, C-terminal
N_psidii_MA3_00338	312	Pfam	PF01738	Dienelactone hydrolase family	60	310	3.3e-18	IPR002925	Dienelactone hydrolase
N_psidii_MA3_00339	602	Pfam	PF08646	Replication factor-A C terminal domain	446	591	4.1e-57	IPR013955	Replication factor A, C-terminal
N_psidii_MA3_00339	602	Pfam	PF16900	Replication protein A OB domain	290	387	3.6e-36	IPR031657	Replication protein A, OB domain
N_psidii_MA3_00339	602	Pfam	PF01336	OB-fold nucleic acid binding domain	181	265	1.7e-10	IPR004365	OB-fold nucleic acid binding domain, AA-tRNA synthetase-type
N_psidii_MA3_00339	602	Pfam	PF04057	Replication factor-A protein 1, N-terminal domain	7	108	2.5e-22	IPR007199	Replication factor-A protein 1, N-terminal
N_psidii_MA3_00340	445	Pfam	PF00171	Aldehyde dehydrogenase family	6	286	7.6e-12	IPR015590	Aldehyde dehydrogenase domain
N_psidii_MA3_00341	575	Pfam	PF07690	Major Facilitator Superfamily	128	522	4.6e-45	IPR011701	Major facilitator superfamily
N_psidii_MA3_00342	462	Pfam	PF00291	Pyridoxal-phosphate dependent enzyme	125	420	2.2e-64	IPR001926	Pyridoxal-phosphate dependent enzyme
N_psidii_MA3_00343	403	Pfam	PF07991	Acetohydroxy acid isomeroreductase, NADPH-binding domain	82	247	1e-45	IPR013116	Acetohydroxy acid isomeroreductase, NADPH-binding domain
N_psidii_MA3_00343	403	Pfam	PF01450	Acetohydroxy acid isomeroreductase, catalytic domain	255	399	3.3e-40	IPR000506	Acetohydroxy acid isomeroreductase C-terminal
N_psidii_MA3_00344	185	Pfam	PF00179	Ubiquitin-conjugating enzyme	35	168	2e-37	IPR000608	Ubiquitin-conjugating enzyme E2
N_psidii_MA3_00345	908	Pfam	PF08407	Chitin synthase N-terminal	140	218	4.5e-27	IPR013616	Chitin synthase N-terminal
N_psidii_MA3_00345	908	Pfam	PF01644	Chitin synthase	219	387	5.6e-67	IPR004834	Fungal chitin synthase
N_psidii_MA3_00349	432	Pfam	PF09463	Opy2 protein	28	64	7.1e-09	IPR018571	Membrane anchor Opy2, N-terminal
N_psidii_MA3_00351	236	Pfam	PF00071	Ras family	9	186	1.1e-50	IPR001806	Small GTPase superfamily
N_psidii_MA3_00359	1379	Pfam	PF12814	Meiotic cell cortex C-terminal pleckstrin homology	968	1099	9.4e-48	IPR024774	Pleckstrin homology domain, Mcp5-type
N_psidii_MA3_00360	326	Pfam	PF02338	OTU-like cysteine protease	191	319	3.2e-24	IPR003323	OTU domain
N_psidii_MA3_00361	282	Pfam	PF05724	Thiopurine S-methyltransferase (TPMT)	74	228	1.1e-27	IPR008854	TPMT family
N_psidii_MA3_00363	240	Pfam	PF13561	Enoyl-(Acyl carrier protein) reductase	2	234	7.7e-42
N_psidii_MA3_00366	287	Pfam	PF17171	Glutathione S-transferase, C-terminal domain	212	277	1.3e-15	IPR033468	Metaxin, glutathione S-transferase domain
N_psidii_MA3_00366	287	Pfam	PF17172	Glutathione S-transferase N-terminal domain	66	163	2.3e-19	IPR012336	Thioredoxin-like fold
N_psidii_MA3_00367	669	Pfam	PF08513	LisH	409	432	0.0001	IPR006594	LIS1 homology motif
N_psidii_MA3_00367	669	Pfam	PF10607	CTLH/CRA C-terminal to LisH motif domain	461	643	2.2e-30	IPR024964	CTLH/CRA C-terminal to LisH motif domain
N_psidii_MA3_00367	669	Pfam	PF00622	SPRY domain	251	370	5.1e-25	IPR003877	SPRY domain
N_psidii_MA3_00368	266	Pfam	PF08193	INO80 complex subunit Ies4	5	235	1.6e-80	IPR013175	INO80 complex, subunit Ies4
N_psidii_MA3_00373	491	Pfam	PF01231	Indoleamine 2,3-dioxygenase	22	423	7e-31	IPR000898	Indoleamine 2,3-dioxygenase
N_psidii_MA3_00377	176	Pfam	PF08045	Cell division control protein 14, SIN component	19	171	7.3e-65	IPR012535	Cell division protein Cdc14
N_psidii_MA3_00379	495	Pfam	PF00348	Polyprenyl synthetase	208	448	3.5e-63	IPR000092	Polyprenyl synthetase
N_psidii_MA3_00380	483	Pfam	PF06398	Integral peroxisomal membrane peroxin	95	471	2.3e-93	IPR010482	Peroxin domain
N_psidii_MA3_00383	1405	Pfam	PF00069	Protein kinase domain	992	1288	5.5e-53	IPR000719	Protein kinase domain
N_psidii_MA3_00390	222	Pfam	PF03357	Snf7	20	189	1.8e-33	IPR005024	Snf7 family
N_psidii_MA3_00392	403	Pfam	PF03452	Anp1	101	361	3.1e-107
N_psidii_MA3_00394	389	Pfam	PF00730	HhH-GPD superfamily base excision DNA repair protein	209	335	2.3e-14	IPR003265	HhH-GPD domain
N_psidii_MA3_00398	495	Pfam	PF01585	G-patch domain	331	369	1.8e-13	IPR000467	G-patch domain
N_psidii_MA3_00398	495	Pfam	PF00076	RNA recognition motif. (a.k.a. RRM, RBD, or RNP domain)	435	479	2.5e-05	IPR000504	RNA recognition motif domain
N_psidii_MA3_00399	476	Pfam	PF00270	DEAD/DEAH box helicase	88	251	6.3e-32	IPR011545	DEAD/DEAH box helicase domain
N_psidii_MA3_00399	476	Pfam	PF00271	Helicase conserved C-terminal domain	300	406	3.1e-23	IPR001650	Helicase, C-terminal
N_psidii_MA3_00402	124	Pfam	PF01776	Ribosomal L22e protein family	13	121	4.9e-45	IPR002671	Ribosomal protein L22e
N_psidii_MA3_00403	328	Pfam	PF00153	Mitochondrial carrier protein	137	227	7.1e-15	IPR018108	Mitochondrial substrate/solute carrier
N_psidii_MA3_00403	328	Pfam	PF00153	Mitochondrial carrier protein	33	117	8.4e-18	IPR018108	Mitochondrial substrate/solute carrier
N_psidii_MA3_00403	328	Pfam	PF00153	Mitochondrial carrier protein	236	327	1.2e-13	IPR018108	Mitochondrial substrate/solute carrier
N_psidii_MA3_00409	265	Pfam	PF06331	Transcription factor TFIIH complex subunit Tfb5	195	255	5.5e-25	IPR009400	TFIIH subunit TTDA/Tfb5
N_psidii_MA3_00410	288	Pfam	PF00378	Enoyl-CoA hydratase/isomerase	28	252	2.7e-39	IPR001753	Crotonase superfamily
N_psidii_MA3_00412	452	Pfam	PF03198	Glucanosyltransferase	29	327	1.8e-126	IPR004886	Glucanosyltransferase
N_psidii_MA3_00414	982	Pfam	PF01237	Oxysterol-binding protein	602	963	6.1e-112	IPR000648	Oxysterol-binding protein
N_psidii_MA3_00414	982	Pfam	PF15409	Pleckstrin homology domain	222	308	2.3e-37
N_psidii_MA3_00415	697	Pfam	PF01412	Putative GTPase activating protein for Arf	14	125	9.6e-39	IPR001164	Arf GTPase activating protein
N_psidii_MA3_00416	433	Pfam	PF05686	Glycosyl transferase family 90	89	315	3.8e-17	IPR006598	Lipopolysaccharide-modifying protein
N_psidii_MA3_00417	261	Pfam	PF02100	Ornithine decarboxylase antizyme	149	261	3e-45	IPR002993	Ornithine decarboxylase antizyme
N_psidii_MA3_00418	631	Pfam	PF00977	Histidine biosynthesis protein	316	609	1.4e-47	IPR006062	Histidine biosynthesis
N_psidii_MA3_00418	631	Pfam	PF00117	Glutamine amidotransferase class-I	91	278	5.1e-19	IPR017926	Glutamine amidotransferase
N_psidii_MA3_00419	372	Pfam	PF10419	TFIIIC subunit	102	135	1.7e-14	IPR019481	Transcription factor TFIIIC, tau55-related
N_psidii_MA3_00420	518	Pfam	PF06101	Vacuolar protein sorting-associated protein 62	328	391	5.7e-11	IPR009291	Vacuolar protein sorting-associated protein 62
N_psidii_MA3_00424	221	Pfam	PF00252	Ribosomal protein L16p/L10e	12	166	6.2e-46	IPR016180	Ribosomal protein L10e/L16
N_psidii_MA3_00425	110	Pfam	PF01248	Ribosomal protein L7Ae/L30e/S12e/Gadd45 family	13	105	1.7e-24	IPR004038	Ribosomal protein L7Ae/L30e/S12e/Gadd45
N_psidii_MA3_00429	845	Pfam	PF12751	Vacuolar segregation subunit 7	330	707	5.2e-162	IPR024260	Vacuolar segregation subunit 7
N_psidii_MA3_00430	385	Pfam	PF00398	Ribosomal RNA adenine dimethylase	40	265	3.6e-63	IPR001737	Ribosomal RNA adenine methyltransferase KsgA/Erm
N_psidii_MA3_00431	928	Pfam	PF14559	Tetratricopeptide repeat	608	666	3.5e-08
N_psidii_MA3_00431	928	Pfam	PF13432	Tetratricopeptide repeat	676	728	0.00021
N_psidii_MA3_00431	928	Pfam	PF06424	PRP1 splicing factor, N-terminal	12	166	1.6e-49	IPR010491	PRP1 splicing factor, N-terminal
N_psidii_MA3_00435	429	Pfam	PF00481	Protein phosphatase 2C	25	279	1.5e-82	IPR001932	PPM-type phosphatase domain
N_psidii_MA3_00443	781	Pfam	PF08217	Fungal domain of unknown function (DUF1712)	22	122	8.7e-09	IPR013176	Protein of unknown function DUF1712, fungi
N_psidii_MA3_00448	578	Pfam	PF13415	Galactose oxidase, central domain	326	371	4.7e-07
N_psidii_MA3_00448	578	Pfam	PF01344	Kelch motif	201	247	1.4e-07	IPR006652	Kelch repeat type 1
N_psidii_MA3_00449	258	Pfam	PF01257	Thioredoxin-like [2Fe-2S] ferredoxin	63	210	7.7e-58
N_psidii_MA3_00453	576	Pfam	PF00501	AMP-binding enzyme	29	461	7.7e-84	IPR000873	AMP-dependent synthetase/ligase
N_psidii_MA3_00453	576	Pfam	PF13193	AMP-binding enzyme C-terminal domain	470	546	9.4e-13	IPR025110	AMP-binding enzyme, C-terminal domain
N_psidii_MA3_00454	454	Pfam	PF01266	FAD dependent oxidoreductase	45	410	1.9e-47	IPR006076	FAD dependent oxidoreductase
N_psidii_MA3_00455	1075	Pfam	PF00069	Protein kinase domain	754	1032	4e-40	IPR000719	Protein kinase domain
N_psidii_MA3_00457	153	Pfam	PF00383	Cytidine and deoxycytidylate deaminase zinc-binding region	1	114	1e-23	IPR002125	Cytidine and deoxycytidylate deaminase domain
N_psidii_MA3_00458	695	Pfam	PF16420	Ubiquitin-like modifier-activating enzyme ATG7 N-terminus	5	332	2e-108	IPR032197	Ubiquitin-like modifier-activating enzyme Atg7, N-terminal
N_psidii_MA3_00458	695	Pfam	PF00899	ThiF family	353	628	6e-44	IPR000594	THIF-type NAD/FAD binding fold
N_psidii_MA3_00463	133	Pfam	PF06699	GPI biosynthesis protein family Pig-F	46	109	1.3e-05	IPR009580	GPI biosynthesis protein Pig-F
N_psidii_MA3_00464	144	Pfam	PF06699	GPI biosynthesis protein family Pig-F	4	121	5e-49	IPR009580	GPI biosynthesis protein Pig-F
N_psidii_MA3_00466	57	Pfam	PF01679	Proteolipid membrane potential modulator	7	54	7.8e-25	IPR000612	Proteolipid membrane potential modulator
N_psidii_MA3_00468	519	Pfam	PF07690	Major Facilitator Superfamily	77	448	1.3e-35	IPR011701	Major facilitator superfamily
N_psidii_MA3_00469	1022	Pfam	PF14773	Helicase-associated putative binding domain, C-terminal	785	846	2.1e-28	IPR029256	Helicase-associated putative binding domain
N_psidii_MA3_00469	1022	Pfam	PF00271	Helicase conserved C-terminal domain	554	663	7.3e-20	IPR001650	Helicase, C-terminal
N_psidii_MA3_00469	1022	Pfam	PF00176	SNF2 family N-terminal domain	192	458	5.6e-50	IPR000330	SNF2-related, N-terminal domain
N_psidii_MA3_00470	298	Pfam	PF13489	Methyltransferase domain	94	225	2e-09
N_psidii_MA3_00472	183	Pfam	PF01479	S4 domain	109	155	1.8e-13	IPR002942	RNA-binding S4 domain
N_psidii_MA3_00472	183	Pfam	PF00163	Ribosomal protein S4/S9 N-terminal domain	4	63	2.3e-11	IPR001912	Ribosomal protein S4/S9, N-terminal
N_psidii_MA3_00473	226	Pfam	PF01084	Ribosomal protein S18	160	205	1.3e-08	IPR001648	Ribosomal protein S18
N_psidii_MA3_00475	351	Pfam	PF00248	Aldo/keto reductase family	12	320	6.8e-51	IPR023210	NADP-dependent oxidoreductase domain
N_psidii_MA3_00477	542	Pfam	PF00892	EamA-like transporter family	266	341	2.2e-06	IPR000620	EamA domain
N_psidii_MA3_00479	138	Pfam	PF07249	Cerato-platanin	19	138	2.8e-58	IPR010829	Cerato-platanin
N_psidii_MA3_00481	505	Pfam	PF07690	Major Facilitator Superfamily	84	445	7.8e-26	IPR011701	Major facilitator superfamily
N_psidii_MA3_00482	664	Pfam	PF04082	Fungal specific transcription factor domain	308	482	4.6e-11	IPR007219	Transcription factor domain, fungi
N_psidii_MA3_00482	664	Pfam	PF00172	Fungal Zn(2)-Cys(6) binuclear cluster domain	5	42	3.6e-07	IPR001138	Zn(2)-C6 fungal-type DNA-binding domain
N_psidii_MA3_00484	1409	Pfam	PF06422	CDR ABC transporter	643	729	4.2e-23	IPR010929	CDR ABC transporter
N_psidii_MA3_00484	1409	Pfam	PF00005	ABC transporter	101	256	4.7e-17	IPR003439	ABC transporter-like
N_psidii_MA3_00484	1409	Pfam	PF00005	ABC transporter	797	948	1.6e-18	IPR003439	ABC transporter-like
N_psidii_MA3_00484	1409	Pfam	PF01061	ABC-2 type transporter	421	630	2.2e-46	IPR013525	ABC-2 type transporter
N_psidii_MA3_00484	1409	Pfam	PF01061	ABC-2 type transporter	1091	1299	7.9e-39	IPR013525	ABC-2 type transporter
N_psidii_MA3_00486	241	Pfam	PF00069	Protein kinase domain	47	213	1.8e-18	IPR000719	Protein kinase domain
N_psidii_MA3_00487	213	Pfam	PF00583	Acetyltransferase (GNAT) family	103	172	5.9e-05	IPR000182	GNAT domain
N_psidii_MA3_00488	178	Pfam	PF00583	Acetyltransferase (GNAT) family	55	150	1.2e-05	IPR000182	GNAT domain
N_psidii_MA3_00491	1100	Pfam	PF07944	Beta-L-arabinofuranosidase, GH127	527	1043	4.8e-132	IPR012878	Beta-L-arabinofuranosidase, GH127
N_psidii_MA3_00498	212	Pfam	PF00071	Ras family	16	175	1.1e-50	IPR001806	Small GTPase superfamily
N_psidii_MA3_00499	350	Pfam	PF00106	short chain dehydrogenase	28	236	2.2e-33	IPR002347	Short-chain dehydrogenase/reductase SDR
N_psidii_MA3_00502	329	Pfam	PF07572	Bucentaur or craniofacial development	256	326	3.5e-24	IPR011421	BCNT-C domain
N_psidii_MA3_00503	306	Pfam	PF15375	Domain of unknown function (DUF4602)	117	262	4.8e-08	IPR027973	Protein of unknown function DUF4602
N_psidii_MA3_00504	706	Pfam	PF02200	STE like transcription factor	55	163	4.8e-56	IPR003120	Transcription factor Ste12
N_psidii_MA3_00504	706	Pfam	PF00096	Zinc finger, C2H2 type	559	583	0.00091
N_psidii_MA3_00504	706	Pfam	PF00096	Zinc finger, C2H2 type	589	611	1.1e-05
N_psidii_MA3_00510	598	Pfam	PF08953	Domain of unknown function (DUF1899)	4	69	5.4e-35	IPR015048	Domain of unknown function DUF1899
N_psidii_MA3_00510	598	Pfam	PF16300	Type of WD40 repeat	347	386	2.2e-18
N_psidii_MA3_00510	598	Pfam	PF00400	WD domain, G-beta repeat	174	207	5.3e-05	IPR001680	WD40 repeat
N_psidii_MA3_00510	598	Pfam	PF00400	WD domain, G-beta repeat	77	109	0.0052	IPR001680	WD40 repeat
N_psidii_MA3_00510	598	Pfam	PF00400	WD domain, G-beta repeat	129	166	0.00095	IPR001680	WD40 repeat
N_psidii_MA3_00511	284	Pfam	PF00169	PH domain	120	236	8.2e-09	IPR001849	Pleckstrin homology domain
N_psidii_MA3_00511	284	Pfam	PF08174	Cell division protein anillin	3	87	4.8e-05	IPR012966	Anillin homology domain
N_psidii_MA3_00513	259	Pfam	PF00977	Histidine biosynthesis protein	6	237	4.5e-36	IPR006062	Histidine biosynthesis
N_psidii_MA3_00514	654	Pfam	PF06985	Heterokaryon incompatibility protein (HET)	108	246	8.2e-19	IPR010730	Heterokaryon incompatibility
N_psidii_MA3_00516	786	Pfam	PF01794	Ferric reductase like transmembrane component	278	392	2.6e-20	IPR013130	Ferric reductase transmembrane component-like domain
N_psidii_MA3_00520	478	Pfam	PF08564	Cdc37 C terminal domain	381	471	7.8e-34	IPR013873	Cdc37, C-terminal
N_psidii_MA3_00520	478	Pfam	PF08565	Cdc37 Hsp90 binding domain	246	355	7.2e-39	IPR013874	Cdc37, Hsp90 binding
N_psidii_MA3_00520	478	Pfam	PF03234	Cdc37 N terminal kinase binding	2	139	2.1e-51	IPR013855	Cdc37, N-terminal domain
N_psidii_MA3_00523	114	Pfam	PF01910	Thiamine-binding protein	14	105	1.3e-31	IPR002767	Thiamine-binding protein
N_psidii_MA3_00524	761	Pfam	PF00171	Aldehyde dehydrogenase family	211	673	5e-161	IPR015590	Aldehyde dehydrogenase domain
N_psidii_MA3_00525	460	Pfam	PF00202	Aminotransferase class-III	32	457	1.3e-120	IPR005814	Aminotransferase class-III
N_psidii_MA3_00528	765	Pfam	PF04082	Fungal specific transcription factor domain	261	480	8.8e-25	IPR007219	Transcription factor domain, fungi
N_psidii_MA3_00528	765	Pfam	PF00172	Fungal Zn(2)-Cys(6) binuclear cluster domain	25	56	6e-07	IPR001138	Zn(2)-C6 fungal-type DNA-binding domain
N_psidii_MA3_00529	430	Pfam	PF07946	Protein of unknown function (DUF1682)	71	421	1.4e-111	IPR012879	Protein of unknown function DUF1682
N_psidii_MA3_00531	587	Pfam	PF12330	Haspin like kinase domain	162	528	5.1e-33
N_psidii_MA3_00534	110	Pfam	PF03660	PHF5-like protein	1	103	1.1e-51	IPR005345	PHF5-like
N_psidii_MA3_00535	218	Pfam	PF04696	pinin/SDK/memA/ protein conserved region	5	120	6.1e-34	IPR006786	Pinin/SDK/MemA protein
N_psidii_MA3_00537	340	Pfam	PF00561	alpha/beta hydrolase fold	40	316	1.4e-26	IPR000073	Alpha/beta hydrolase fold-1
N_psidii_MA3_00538	391	Pfam	PF10235	Microtubule-associated protein CRIPT	285	376	1.8e-21	IPR019367	PDZ-binding protein, CRIPT
N_psidii_MA3_00539	1358	Pfam	PF16212	Phospholipid-translocating P-type ATPase C-terminal	1028	1279	3.6e-80	IPR032630	P-type ATPase, C-terminal
N_psidii_MA3_00539	1358	Pfam	PF13246	Cation transport ATPase (P-type)	687	778	2.1e-11
N_psidii_MA3_00539	1358	Pfam	PF00122	E1-E2 ATPase	323	517	4.9e-08
N_psidii_MA3_00539	1358	Pfam	PF16209	Phospholipid-translocating ATPase N-terminal	229	295	7.1e-27	IPR032631	P-type ATPase, N-terminal
N_psidii_MA3_00541	275	Pfam	PF12855	Life-span regulatory factor	68	107	1.4e-11	IPR024368	Life-span regulatory factor
N_psidii_MA3_00544	671	Pfam	PF13854	Kelch motif	278	326	2.2e-10
N_psidii_MA3_00547	325	Pfam	PF08231	SYF2 splicing factor	143	320	5.6e-56	IPR013260	mRNA splicing factor SYF2
N_psidii_MA3_00548	289	Pfam	PF01370	NAD dependent epimerase/dehydratase family	8	84	3.6e-05	IPR001509	NAD-dependent epimerase/dehydratase
N_psidii_MA3_00550	270	Pfam	PF03366	YEATS family	44	127	1.3e-29	IPR005033	YEATS
N_psidii_MA3_00552	458	Pfam	PF06090	Inositol-pentakisphosphate 2-kinase	287	349	1.9e-08	IPR009286	Inositol-pentakisphosphate 2-kinase
N_psidii_MA3_00552	458	Pfam	PF06090	Inositol-pentakisphosphate 2-kinase	60	235	2.9e-24	IPR009286	Inositol-pentakisphosphate 2-kinase
N_psidii_MA3_00554	760	Pfam	PF00250	Forkhead domain	202	286	6.1e-34	IPR001766	Fork head domain
N_psidii_MA3_00555	208	Pfam	PF07855	Autophagy-related protein 101	26	183	2.7e-58	IPR012445	Autophagy-related protein 101
N_psidii_MA3_00556	520	Pfam	PF04882	Peroxin-3	7	463	1.1e-171	IPR006966	Peroxin-3
N_psidii_MA3_00557	145	Pfam	PF04099	Sybindin-like family	3	142	5e-25	IPR007233	Trafficking protein particle complex subunit
N_psidii_MA3_00558	635	Pfam	PF00069	Protein kinase domain	170	385	2e-50	IPR000719	Protein kinase domain
N_psidii_MA3_00563	507	Pfam	PF00069	Protein kinase domain	228	494	1.1e-49	IPR000719	Protein kinase domain
N_psidii_MA3_00568	148	Pfam	PF13656	RNA polymerase Rpb3/Rpb11 dimerisation domain	60	129	6.2e-30	IPR009025	DNA-directed RNA polymerase, RBP11-like dimerisation domain
N_psidii_MA3_00569	124	Pfam	PF13233	Complex1_LYR-like	25	104	1.9e-05
N_psidii_MA3_00570	148	Pfam	PF01125	G10 protein	1	146	4.3e-62	IPR001748	G10 protein
N_psidii_MA3_00572	190	Pfam	PF10373	Est1 DNA/RNA binding domain	44	187	1.7e-29	IPR018834	DNA/RNA-binding domain, Est1-type
N_psidii_MA3_00574	435	Pfam	PF00294	pfkB family carbohydrate kinase	115	429	5.8e-68	IPR011611	Carbohydrate kinase PfkB
N_psidii_MA3_00575	254	Pfam	PF03947	Ribosomal Proteins L2, C-terminal domain	98	224	6.9e-42	IPR022669	Ribosomal protein L2, C-terminal
N_psidii_MA3_00575	254	Pfam	PF00181	Ribosomal Proteins L2, RNA binding domain	11	89	1.5e-13	IPR022666	Ribosomal Proteins L2, RNA binding domain
N_psidii_MA3_00577	611	Pfam	PF15612	WSTF, HB1, Itc1p, MBD9 motif 1	159	201	0.00017	IPR028942	WHIM1 domain
N_psidii_MA3_00578	161	Pfam	PF08589	Fungal protein of unknown function (DUF1770)	9	102	3e-36	IPR013898	Protein of unknown function DUF1770, fungi
N_psidii_MA3_00579	435	Pfam	PF03464	eRF1 domain 2	146	278	5e-48	IPR005141	eRF1 domain 2
N_psidii_MA3_00579	435	Pfam	PF03463	eRF1 domain 1	19	140	5.2e-21	IPR005140	eRF1 domain 1/Pelota-like
N_psidii_MA3_00579	435	Pfam	PF03465	eRF1 domain 3	281	418	1.5e-40	IPR005142	eRF1 domain 3
N_psidii_MA3_00580	1355	Pfam	PF16746	BAR domain of APPL family	24	194	8.5e-16
N_psidii_MA3_00580	1355	Pfam	PF16016	Domain of unknown function (DUF4782)	890	1034	1.8e-34	IPR031968	VASt domain
N_psidii_MA3_00581	876	Pfam	PF11274	Protein of unknown function (DUF3074)	187	401	2.2e-56	IPR024500	Domain of unknown function DUF3074
N_psidii_MA3_00582	1458	Pfam	PF10350	Putative death-receptor fusion protein (DUF2428)	568	809	5e-64	IPR019442	Domain of unknown function DUF2428, death-receptor-like
N_psidii_MA3_00583	217	Pfam	PF00687	Ribosomal protein L1p/L10e family	23	212	1.7e-45	IPR028364	Ribosomal protein L1/ribosomal biogenesis protein
N_psidii_MA3_00585	519	Pfam	PF03901	Alg9-like mannosyltransferase family	5	398	1.6e-59	IPR005599	GPI mannosyltransferase
N_psidii_MA3_00587	170	Pfam	PF03931	Skp1 family, tetramerisation domain	9	72	3.6e-23	IPR016073	SKP1 component, POZ domain
N_psidii_MA3_00587	170	Pfam	PF01466	Skp1 family, dimerisation domain	120	167	1.7e-29	IPR016072	SKP1 component, dimerisation
N_psidii_MA3_00589	156	Pfam	PF00832	Ribosomal L39 protein	114	154	5.7e-21	IPR000077	Ribosomal protein L39e
N_psidii_MA3_00590	803	Pfam	PF00199	Catalase	453	521	5.5e-22	IPR011614	Catalase core domain
N_psidii_MA3_00590	803	Pfam	PF00199	Catalase	335	388	5.9e-22	IPR011614	Catalase core domain
N_psidii_MA3_00590	803	Pfam	PF00025	ADP-ribosylation factor family	8	174	7.1e-72	IPR006689	Small GTPase superfamily, ARF/SAR type
N_psidii_MA3_00597	860	Pfam	PF02847	MA3 domain	379	484	1.5e-23	IPR003891	Initiation factor eIF-4 gamma, MA3
N_psidii_MA3_00598	186	Pfam	PF07297	Dolichol phosphate-mannose biosynthesis regulatory protein (DPM2)	100	174	4e-34	IPR009914	Dolichol phosphate-mannose biosynthesis regulatory
N_psidii_MA3_00600	147	Pfam	PF13577	SnoaL-like domain	18	141	8.3e-06	IPR037401	SnoaL-like domain
N_psidii_MA3_00613	162	Pfam	PF12223	Protein of unknown function (DUF3602)	27	105	1.6e-06	IPR022024	Protein of unknown function DUF3602
N_psidii_MA3_00613	162	Pfam	PF12223	Protein of unknown function (DUF3602)	11	62	0.00011	IPR022024	Protein of unknown function DUF3602
N_psidii_MA3_00614	504	Pfam	PF08386	TAP-like protein	378	444	1.3e-09	IPR013595	Peptidase S33 tripeptidyl aminopeptidase-like, C-terminal
N_psidii_MA3_00614	504	Pfam	PF00561	alpha/beta hydrolase fold	28	187	1.1e-18	IPR000073	Alpha/beta hydrolase fold-1
N_psidii_MA3_00615	220	Pfam	PF01246	Ribosomal protein L24e	1	65	5.1e-31	IPR000988	Ribosomal protein L24e-related
N_psidii_MA3_00618	297	Pfam	PF08785	Ku C terminal domain like	175	295	5.2e-35	IPR014893	Ku, C-terminal
N_psidii_MA3_00619	390	Pfam	PF02735	Ku70/Ku80 beta-barrel domain	242	356	6.8e-09	IPR006164	Ku70/Ku80 beta-barrel domain
N_psidii_MA3_00619	390	Pfam	PF03731	Ku70/Ku80 N-terminal alpha/beta domain	6	156	7.3e-14	IPR005161	Ku70/Ku80, N-terminal alpha/beta
N_psidii_MA3_00620	190	Pfam	PF13664	Domain of unknown function (DUF4149)	18	127	1.1e-27	IPR025423	Domain of unknown function DUF4149
N_psidii_MA3_00623	306	Pfam	PF13242	HAD-hyrolase-like	226	302	6.5e-14
N_psidii_MA3_00623	306	Pfam	PF13344	Haloacid dehalogenase-like hydrolase	25	128	2.7e-29	IPR006357	HAD-superfamily hydrolase, subfamily IIA
N_psidii_MA3_00624	359	Pfam	PF06966	Protein of unknown function (DUF1295)	69	320	1.1e-36	IPR010721	Protein of unknown function DUF1295
N_psidii_MA3_00625	211	Pfam	PF01751	Toprim domain	3	149	9.9e-20	IPR006171	TOPRIM domain
N_psidii_MA3_00626	422	Pfam	PF01131	DNA topoisomerase	7	284	1.1e-73	IPR013497	DNA topoisomerase, type IA, central
N_psidii_MA3_00628	358	Pfam	PF10330	Putative Sin3 binding protein	94	183	4e-37	IPR018818	Sin3 binding protein
N_psidii_MA3_00630	909	Pfam	PF00096	Zinc finger, C2H2 type	417	439	2.7e-05
N_psidii_MA3_00635	887	Pfam	PF04082	Fungal specific transcription factor domain	306	406	5e-08	IPR007219	Transcription factor domain, fungi
N_psidii_MA3_00635	887	Pfam	PF00172	Fungal Zn(2)-Cys(6) binuclear cluster domain	53	86	2.3e-05	IPR001138	Zn(2)-C6 fungal-type DNA-binding domain
N_psidii_MA3_00635	887	Pfam	PF00172	Fungal Zn(2)-Cys(6) binuclear cluster domain	118	154	1e-06	IPR001138	Zn(2)-C6 fungal-type DNA-binding domain
N_psidii_MA3_00642	816	Pfam	PF00806	Pumilio-family RNA binding repeat	462	493	2.8e-08	IPR001313	Pumilio RNA-binding repeat
N_psidii_MA3_00642	816	Pfam	PF00806	Pumilio-family RNA binding repeat	578	603	7.3e-05	IPR001313	Pumilio RNA-binding repeat
N_psidii_MA3_00642	816	Pfam	PF00806	Pumilio-family RNA binding repeat	647	672	1.2e-06	IPR001313	Pumilio RNA-binding repeat
N_psidii_MA3_00642	816	Pfam	PF00806	Pumilio-family RNA binding repeat	427	460	7.8e-05	IPR001313	Pumilio RNA-binding repeat
N_psidii_MA3_00642	816	Pfam	PF00806	Pumilio-family RNA binding repeat	693	715	2.3e-05	IPR001313	Pumilio RNA-binding repeat
N_psidii_MA3_00642	816	Pfam	PF00806	Pumilio-family RNA binding repeat	537	567	7.8e-05	IPR001313	Pumilio RNA-binding repeat
N_psidii_MA3_00642	816	Pfam	PF00806	Pumilio-family RNA binding repeat	498	531	1.7e-05	IPR001313	Pumilio RNA-binding repeat
N_psidii_MA3_00642	816	Pfam	PF00806	Pumilio-family RNA binding repeat	614	639	0.0005	IPR001313	Pumilio RNA-binding repeat
N_psidii_MA3_00643	399	Pfam	PF07798	Protein of unknown function (DUF1640)	181	354	3.3e-47	IPR024461	Coiled-coil domain-containing protein 90-like
N_psidii_MA3_00644	285	Pfam	PF03980	Nnf1	129	236	1.2e-35	IPR007128	Polyamine-modulated factor 1/Kinetochore protein NNF1
N_psidii_MA3_00645	419	Pfam	PF15410	Pleckstrin homology domain	101	215	7e-09
N_psidii_MA3_00649	440	Pfam	PF02136	Nuclear transport factor 2 (NTF2) domain	38	153	3.9e-24	IPR002075	Nuclear transport factor 2
N_psidii_MA3_00651	247	Pfam	PF00466	Ribosomal protein L10	18	120	2e-21	IPR001790	Ribosomal protein L10P
N_psidii_MA3_00652	377	Pfam	PF12220	U1 small nuclear ribonucleoprotein of 70kDa MW N terminal	3	89	1.6e-20	IPR022023	U1 small nuclear ribonucleoprotein of 70kDa N-terminal
N_psidii_MA3_00652	377	Pfam	PF00076	RNA recognition motif. (a.k.a. RRM, RBD, or RNP domain)	100	178	1.3e-15	IPR000504	RNA recognition motif domain
N_psidii_MA3_00653	137	Pfam	PF05047	Mitochondrial ribosomal protein L51 / S25 / CI-B8 domain	41	90	4.8e-15	IPR007741	Ribosomal protein/NADH dehydrogenase domain
N_psidii_MA3_00654	247	Pfam	PF00121	Triosephosphate isomerase	6	242	7e-89	IPR000652	Triosephosphate isomerase
N_psidii_MA3_00659	488	Pfam	PF00172	Fungal Zn(2)-Cys(6) binuclear cluster domain	18	49	7.1e-09	IPR001138	Zn(2)-C6 fungal-type DNA-binding domain
N_psidii_MA3_00663	747	Pfam	PF00172	Fungal Zn(2)-Cys(6) binuclear cluster domain	310	333	0.00023	IPR001138	Zn(2)-C6 fungal-type DNA-binding domain
N_psidii_MA3_00666	162	Pfam	PF04418	Domain of unknown function (DUF543)	85	150	8.9e-30	IPR007512	MICOS complex subunit Mic10
N_psidii_MA3_00667	970	Pfam	PF10441	Urb2/Npa2 family	759	969	5.7e-66	IPR018849	Nucleolar 27S pre-rRNA processing, Urb2/Npa2, C-terminal
N_psidii_MA3_00668	322	Pfam	PF00106	short chain dehydrogenase	14	215	1.4e-31	IPR002347	Short-chain dehydrogenase/reductase SDR
N_psidii_MA3_00669	1096	Pfam	PF08424	NRDE-2, necessary for RNA interference	285	604	1.8e-98	IPR013633	siRNA-mediated silencing protein NRDE-2
N_psidii_MA3_00670	643	Pfam	PF00387	Phosphatidylinositol-specific phospholipase C, Y domain	368	478	5.3e-41	IPR001711	Phospholipase C, phosphatidylinositol-specific, Y domain
N_psidii_MA3_00670	643	Pfam	PF00388	Phosphatidylinositol-specific phospholipase C, X domain	105	324	4.2e-60	IPR000909	Phosphatidylinositol-specific phospholipase C, X domain
N_psidii_MA3_00674	142	Pfam	PF10190	Putative transmembrane protein 170	37	142	5.4e-27	IPR019334	Transmembrane protein 170
N_psidii_MA3_00675	282	Pfam	PF04140	Isoprenylcysteine carboxyl methyltransferase (ICMT) family	169	261	2.3e-27	IPR007269	Isoprenylcysteine carboxyl methyltransferase
N_psidii_MA3_00676	508	Pfam	PF03062	MBOAT, membrane-bound O-acyltransferase family	262	477	2.5e-18	IPR004299	Membrane bound O-acyl transferase, MBOAT
N_psidii_MA3_00677	614	Pfam	PF00400	WD domain, G-beta repeat	133	165	0.0012	IPR001680	WD40 repeat
N_psidii_MA3_00677	614	Pfam	PF00400	WD domain, G-beta repeat	373	403	0.0026	IPR001680	WD40 repeat
N_psidii_MA3_00677	614	Pfam	PF00400	WD domain, G-beta repeat	253	292	0.059	IPR001680	WD40 repeat
N_psidii_MA3_00677	614	Pfam	PF00400	WD domain, G-beta repeat	216	249	6.6e-05	IPR001680	WD40 repeat
N_psidii_MA3_00677	614	Pfam	PF00400	WD domain, G-beta repeat	170	207	2.5e-05	IPR001680	WD40 repeat
N_psidii_MA3_00677	614	Pfam	PF00400	WD domain, G-beta repeat	302	331	0.19	IPR001680	WD40 repeat
N_psidii_MA3_00678	351	Pfam	PF01223	DNA/RNA non-specific endonuclease	82	311	8e-67	IPR001604	DNA/RNA non-specific endonuclease
N_psidii_MA3_00680	542	Pfam	PF00067	Cytochrome P450	34	514	2.3e-72	IPR001128	Cytochrome P450
N_psidii_MA3_00681	251	Pfam	PF03221	Tc5 transposase DNA-binding domain	61	120	3.8e-11	IPR006600	HTH CenpB-type DNA-binding domain
N_psidii_MA3_00681	251	Pfam	PF05225	helix-turn-helix, Psq domain	25	49	4.1e-05	IPR007889	DNA binding HTH domain, Psq-type
N_psidii_MA3_00681	251	Pfam	PF03184	DDE superfamily endonuclease	195	249	7.8e-05	IPR004875	DDE superfamily endonuclease domain
N_psidii_MA3_00682	541	Pfam	PF02535	ZIP Zinc transporter	15	191	2.1e-12	IPR003689	Zinc/iron permease
N_psidii_MA3_00682	541	Pfam	PF02535	ZIP Zinc transporter	320	531	4.4e-22	IPR003689	Zinc/iron permease
N_psidii_MA3_00683	495	Pfam	PF00096	Zinc finger, C2H2 type	293	316	6.6e-05
N_psidii_MA3_00683	495	Pfam	PF00096	Zinc finger, C2H2 type	163	186	0.00013
N_psidii_MA3_00683	495	Pfam	PF00096	Zinc finger, C2H2 type	74	96	0.01
N_psidii_MA3_00683	495	Pfam	PF00096	Zinc finger, C2H2 type	133	157	0.0071
N_psidii_MA3_00684	153	Pfam	PF01192	RNA polymerase Rpb6	80	132	8.9e-17	IPR006110	RNA polymerase, subunit omega/K/RPB6
N_psidii_MA3_00685	463	Pfam	PF00264	Common central domain of tyrosinase	30	277	1.1e-43	IPR002227	Tyrosinase copper-binding domain
N_psidii_MA3_00687	286	Pfam	PF00756	Putative esterase	24	275	9.5e-47	IPR000801	Putative esterase
N_psidii_MA3_00688	835	Pfam	PF07792	Docking domain of Afi1 for Arf3 in vesicle trafficking	121	259	6.2e-48	IPR012860	Arf3-interacting protein 1, N-terminal domain
N_psidii_MA3_00688	835	Pfam	PF08616	Stabilization of polarity axis	448	557	5.3e-37
N_psidii_MA3_00690	694	Pfam	PF14559	Tetratricopeptide repeat	239	288	1.5e-09
N_psidii_MA3_00690	694	Pfam	PF00226	DnaJ domain	552	614	1.6e-27	IPR001623	DnaJ domain
N_psidii_MA3_00690	694	Pfam	PF13181	Tetratricopeptide repeat	465	495	8.5e-05	IPR019734	Tetratricopeptide repeat
N_psidii_MA3_00690	694	Pfam	PF13432	Tetratricopeptide repeat	362	412	0.0012
N_psidii_MA3_00691	311	Pfam	PF09748	Transcription factor subunit Med10 of Mediator complex	149	269	2.2e-51	IPR019145	Mediator complex, subunit Med10
N_psidii_MA3_00694	130	Pfam	PF13843	Transposase IS4	62	129	6.2e-09	IPR029526	PiggyBac transposable element-derived protein
N_psidii_MA3_00697	366	Pfam	PF00180	Isocitrate/isopropylmalate dehydrogenase	5	356	1.3e-130	IPR024084	Isopropylmalate dehydrogenase-like domain
N_psidii_MA3_00705	624	Pfam	PF14616	Domain of unknown function (DUF4451)	427	527	1.2e-23	IPR028012	Protein of unknown function DUF4451
N_psidii_MA3_00713	301	Pfam	PF01553	Acyltransferase	98	216	3.9e-32	IPR002123	Phospholipid/glycerol acyltransferase
N_psidii_MA3_00714	625	Pfam	PF14831	Domain of unknown function (DUF4484)	430	625	1.7e-63	IPR028115	Domain of unknown function DUF4484
N_psidii_MA3_00714	625	Pfam	PF09804	Uncharacterized conserved protein (DUF2347)	29	354	4.4e-109	IPR018626	Protein of unknown function DUF2347
N_psidii_MA3_00715	700	Pfam	PF00226	DnaJ domain	105	173	2.5e-16	IPR001623	DnaJ domain
N_psidii_MA3_00716	769	Pfam	PF11815	Domain of unknown function (DUF3336)	197	348	1.1e-50	IPR021771	Triacylglycerol lipase
N_psidii_MA3_00716	769	Pfam	PF01734	Patatin-like phospholipase	356	545	1.5e-21	IPR002641	Patatin-like phospholipase domain
N_psidii_MA3_00717	189	Pfam	PF00025	ADP-ribosylation factor family	7	189	1.8e-65	IPR006689	Small GTPase superfamily, ARF/SAR type
N_psidii_MA3_00719	733	Pfam	PF10446	Protein of unknown function (DUF2457)	287	733	4.9e-176	IPR018853	Protein of unknown function DUF2457
N_psidii_MA3_00722	928	Pfam	PF00172	Fungal Zn(2)-Cys(6) binuclear cluster domain	75	111	4.9e-06	IPR001138	Zn(2)-C6 fungal-type DNA-binding domain
N_psidii_MA3_00722	928	Pfam	PF04082	Fungal specific transcription factor domain	381	594	4.9e-11	IPR007219	Transcription factor domain, fungi
N_psidii_MA3_00722	928	Pfam	PF00096	Zinc finger, C2H2 type	40	62	0.00051
N_psidii_MA3_00722	928	Pfam	PF00096	Zinc finger, C2H2 type	12	34	1.2e-05
N_psidii_MA3_00724	537	Pfam	PF00083	Sugar (and other) transporter	58	509	6.1e-83	IPR005828	Major facilitator, sugar transporter-like
N_psidii_MA3_00726	294	Pfam	PF11807	Domain of unknown function (DUF3328)	46	202	7.3e-19	IPR021765	Mycotoxin biosynthesis protein UstYa-like
N_psidii_MA3_00728	294	Pfam	PF05368	NmrA-like family	4	213	2e-21	IPR008030	NmrA-like domain
N_psidii_MA3_00729	383	Pfam	PF00067	Cytochrome P450	66	368	5.3e-29	IPR001128	Cytochrome P450
N_psidii_MA3_00730	174	Pfam	PF00067	Cytochrome P450	21	95	2.4e-17	IPR001128	Cytochrome P450
N_psidii_MA3_00733	209	Pfam	PF00733	Asparagine synthase	35	144	1.9e-15	IPR001962	Asparagine synthase
N_psidii_MA3_00734	1086	Pfam	PF02823	ATP synthase, Delta/Epsilon chain, beta-sandwich domain	57	129	5.2e-16	IPR020546	ATP synthase, F1 complex, delta/epsilon subunit, N-terminal
N_psidii_MA3_00737	556	Pfam	PF00135	Carboxylesterase family	33	531	8.6e-74	IPR002018	Carboxylesterase, type B
N_psidii_MA3_00740	496	Pfam	PF00056	lactate/malate dehydrogenase, NAD binding domain	258	325	1.3e-12	IPR001236	Lactate/malate dehydrogenase, N-terminal
N_psidii_MA3_00740	496	Pfam	PF02826	D-isomer specific 2-hydroxyacid dehydrogenase, NAD binding domain	77	206	2.8e-32	IPR006140	D-isomer specific 2-hydroxyacid dehydrogenase, NAD-binding domain
N_psidii_MA3_00740	496	Pfam	PF00389	D-isomer specific 2-hydroxyacid dehydrogenase, catalytic domain	45	220	1.3e-06	IPR006139	D-isomer specific 2-hydroxyacid dehydrogenase, catalytic domain
N_psidii_MA3_00741	531	Pfam	PF00171	Aldehyde dehydrogenase family	62	524	1.5e-171	IPR015590	Aldehyde dehydrogenase domain
N_psidii_MA3_00748	273	Pfam	PF08450	SMP-30/Gluconolaconase/LRE-like region	20	265	1.8e-67	IPR013658	SMP-30/Gluconolactonase/LRE-like region
N_psidii_MA3_00756	397	Pfam	PF08528	Whi5 like	226	250	1.1e-09	IPR013734	Transcription factor Nrm1/Whi5
N_psidii_MA3_00757	503	Pfam	PF02127	Aminopeptidase I zinc metalloprotease (M18)	13	490	1.8e-169	IPR001948	Peptidase M18
N_psidii_MA3_00758	301	Pfam	PF04479	RTA1 like protein	74	280	3.4e-66	IPR007568	RTA-like protein
N_psidii_MA3_00765	1023	Pfam	PF08389	Exportin 1-like protein	103	262	1.5e-35	IPR013598	Exportin-1/Importin-beta-like
N_psidii_MA3_00767	1197	Pfam	PF13181	Tetratricopeptide repeat	1150	1172	0.017	IPR019734	Tetratricopeptide repeat
N_psidii_MA3_00768	128	Pfam	PF08167	rRNA processing/ribosome biogenesis	8	118	1.2e-28	IPR012583	Pre-rRNA-processing protein RIX1, N-terminal
N_psidii_MA3_00769	626	Pfam	PF08167	rRNA processing/ribosome biogenesis	2	84	2.5e-20	IPR012583	Pre-rRNA-processing protein RIX1, N-terminal
N_psidii_MA3_00770	283	Pfam	PF00397	WW domain	101	129	3.8e-09	IPR001202	WW domain
N_psidii_MA3_00771	389	Pfam	PF00722	Glycosyl hydrolases family 16	120	301	6.8e-10	IPR000757	Glycoside hydrolase family 16
N_psidii_MA3_00780	757	Pfam	PF09598	Stm1	456	511	9e-12	IPR019084	Stm1-like, N-terminal
N_psidii_MA3_00780	757	Pfam	PF04774	Hyaluronan / mRNA binding family	560	655	7.5e-06	IPR006861	Hyaluronan/mRNA-binding protein
N_psidii_MA3_00782	578	Pfam	PF07690	Major Facilitator Superfamily	28	140	3e-10	IPR011701	Major facilitator superfamily
N_psidii_MA3_00782	578	Pfam	PF07690	Major Facilitator Superfamily	205	454	9.1e-09	IPR011701	Major facilitator superfamily
N_psidii_MA3_00783	1525	Pfam	PF00626	Gelsolin repeat	1402	1462	3e-05	IPR007123	Gelsolin-like domain
N_psidii_MA3_00783	1525	Pfam	PF13254	Domain of unknown function (DUF4045)	297	668	1.4e-99	IPR025118	Domain of unknown function DUF4045
N_psidii_MA3_00784	181	Pfam	PF00025	ADP-ribosylation factor family	1	172	3e-66	IPR006689	Small GTPase superfamily, ARF/SAR type
N_psidii_MA3_00787	353	Pfam	PF03820	Tricarboxylate carrier	16	353	8.6e-111	IPR004686	Tricarboxylate/iron carrier
N_psidii_MA3_00789	725	Pfam	PF00069	Protein kinase domain	352	691	1.5e-51	IPR000719	Protein kinase domain
N_psidii_MA3_00791	927	Pfam	PF13691	tRNase Z endonuclease	86	147	4e-18	IPR027794	tRNase Z endonuclease
N_psidii_MA3_00791	927	Pfam	PF12706	Beta-lactamase superfamily domain	656	863	1.3e-21	IPR001279	Metallo-beta-lactamase
N_psidii_MA3_00792	286	Pfam	PF01613	Flavin reductase like domain	80	230	6.4e-18	IPR002563	Flavin reductase like domain
N_psidii_MA3_00793	488	Pfam	PF02112	cAMP phosphodiesterases class-II	78	147	6.3e-20	IPR000396	Cyclic-AMP phosphodiesterase, class-II
N_psidii_MA3_00793	488	Pfam	PF02112	cAMP phosphodiesterases class-II	260	347	1.7e-19	IPR000396	Cyclic-AMP phosphodiesterase, class-II
N_psidii_MA3_00797	1833	Pfam	PF06464	DMAP1-binding Domain	3	75	5.2e-12	IPR010506	DMAP1-binding domain
N_psidii_MA3_00797	1833	Pfam	PF00501	AMP-binding enzyme	1043	1493	3.1e-29	IPR000873	AMP-dependent synthetase/ligase
N_psidii_MA3_00797	1833	Pfam	PF00501	AMP-binding enzyme	278	828	2.5e-38	IPR000873	AMP-dependent synthetase/ligase
N_psidii_MA3_00798	354	Pfam	PF14200	Ricin-type beta-trefoil lectin domain-like	50	133	2e-06	IPR000772	Ricin B, lectin domain
N_psidii_MA3_00799	859	Pfam	PF09949	Uncharacterized conserved protein (DUF2183)	418	514	7.5e-31	IPR019236	Domain of unknown function DUF2183
N_psidii_MA3_00800	781	Pfam	PF00271	Helicase conserved C-terminal domain	500	578	5e-25	IPR001650	Helicase, C-terminal
N_psidii_MA3_00800	781	Pfam	PF00270	DEAD/DEAH box helicase	280	450	4.4e-45	IPR011545	DEAD/DEAH box helicase domain
N_psidii_MA3_00801	246	Pfam	PF00307	Calponin homology (CH) domain	3	96	3.2e-06	IPR001715	Calponin homology domain
N_psidii_MA3_00801	246	Pfam	PF03271	EB1-like C-terminal motif	181	226	2.6e-16	IPR004953	EB1, C-terminal
N_psidii_MA3_00803	362	Pfam	PF00787	PX domain	15	113	2.3e-14	IPR001683	Phox homologous domain
N_psidii_MA3_00805	786	Pfam	PF00202	Aminotransferase class-III	568	658	1.3e-13	IPR005814	Aminotransferase class-III
N_psidii_MA3_00805	786	Pfam	PF00202	Aminotransferase class-III	314	434	2.1e-18	IPR005814	Aminotransferase class-III
N_psidii_MA3_00805	786	Pfam	PF13500	AAA domain	17	208	1.7e-30
N_psidii_MA3_00806	421	Pfam	PF04055	Radical SAM superfamily	138	296	1.6e-15	IPR007197	Radical SAM
N_psidii_MA3_00806	421	Pfam	PF06968	Biotin and Thiamin Synthesis associated domain	312	403	3e-23	IPR010722	Biotin and thiamin synthesis-associated domain
N_psidii_MA3_00807	464	Pfam	PF00155	Aminotransferase class I and II	35	419	2.7e-36	IPR004839	Aminotransferase, class I/classII
N_psidii_MA3_00808	250	Pfam	PF03211	Pectate lyase	26	222	8.6e-82	IPR004898	Pectate lyase PlyH/PlyE-like
N_psidii_MA3_00810	880	Pfam	PF14310	Fibronectin type III-like domain	802	870	3.4e-17	IPR026891	Fibronectin type III-like domain
N_psidii_MA3_00810	880	Pfam	PF00933	Glycosyl hydrolase family 3 N terminal domain	107	354	7.2e-36	IPR001764	Glycoside hydrolase, family 3, N-terminal
N_psidii_MA3_00810	880	Pfam	PF01915	Glycosyl hydrolase family 3 C-terminal domain	416	649	9.1e-43	IPR002772	Glycoside hydrolase family 3 C-terminal domain
N_psidii_MA3_00812	409	Pfam	PF01222	Ergosterol biosynthesis ERG4/ERG24 family	6	360	7.3e-127	IPR001171	Ergosterol biosynthesis ERG4/ERG24
N_psidii_MA3_00813	298	Pfam	PF09451	Autophagy-related protein 27	172	280	1.6e-10	IPR018939	Autophagy-related protein 27
N_psidii_MA3_00817	343	Pfam	PF09830	ATP adenylyltransferase	260	330	1.2e-19	IPR019200	ATP adenylyltransferase, C-terminal
N_psidii_MA3_00818	334	Pfam	PF10261	Inositol phospholipid synthesis and fat-storage-inducing TM	87	316	2.9e-75	IPR019388	Fat storage-inducing transmembrane protein
N_psidii_MA3_00821	853	Pfam	PF12708	Pectate lyase superfamily protein	482	540	5.4e-11	IPR024535	Pectate lyase superfamily protein
N_psidii_MA3_00821	853	Pfam	PF12708	Pectate lyase superfamily protein	132	356	2.7e-86	IPR024535	Pectate lyase superfamily protein
N_psidii_MA3_00822	742	Pfam	PF12937	F-box-like	283	328	3.7e-09	IPR001810	F-box domain
N_psidii_MA3_00822	742	Pfam	PF00400	WD domain, G-beta repeat	539	574	0.00096	IPR001680	WD40 repeat
N_psidii_MA3_00822	742	Pfam	PF00400	WD domain, G-beta repeat	620	658	0.00041	IPR001680	WD40 repeat
N_psidii_MA3_00822	742	Pfam	PF00400	WD domain, G-beta repeat	578	616	5.1e-07	IPR001680	WD40 repeat
N_psidii_MA3_00822	742	Pfam	PF00400	WD domain, G-beta repeat	381	411	1.2e-05	IPR001680	WD40 repeat
N_psidii_MA3_00825	360	Pfam	PF08240	Alcohol dehydrogenase GroES-like domain	35	148	1.7e-23	IPR013154	Alcohol dehydrogenase, N-terminal
N_psidii_MA3_00825	360	Pfam	PF00107	Zinc-binding dehydrogenase	190	313	2.4e-14	IPR013149	Alcohol dehydrogenase, C-terminal
N_psidii_MA3_00827	443	Pfam	PF12708	Pectate lyase superfamily protein	359	413	6.4e-18	IPR024535	Pectate lyase superfamily protein
N_psidii_MA3_00829	377	Pfam	PF02668	Taurine catabolism dioxygenase TauD, TfdA family	20	359	3.3e-54	IPR003819	TauD/TfdA-like domain
N_psidii_MA3_00833	642	Pfam	PF07690	Major Facilitator Superfamily	194	583	1.3e-40	IPR011701	Major facilitator superfamily
N_psidii_MA3_00839	422	Pfam	PF00704	Glycosyl hydrolases family 18	11	401	1.2e-74	IPR001223	Glycoside hydrolase family 18, catalytic domain
N_psidii_MA3_00842	351	Pfam	PF00107	Zinc-binding dehydrogenase	181	309	2.3e-30	IPR013149	Alcohol dehydrogenase, C-terminal
N_psidii_MA3_00842	351	Pfam	PF08240	Alcohol dehydrogenase GroES-like domain	36	97	1.5e-08	IPR013154	Alcohol dehydrogenase, N-terminal
N_psidii_MA3_00845	329	Pfam	PF01933	Uncharacterised protein family UPF0052	8	265	6.6e-38	IPR002882	LPPG:FO 2-phospho-L-lactate transferase CofD/UPF0052
N_psidii_MA3_00849	335	Pfam	PF06041	Bacterial protein of unknown function (DUF924)	91	326	2.1e-55	IPR010323	Protein of unknown function DUF924
N_psidii_MA3_00853	556	Pfam	PF05502	Dynactin p62 family	52	504	1e-206	IPR008603	Dynactin subunit 4
N_psidii_MA3_00854	203	Pfam	PF01251	Ribosomal protein S7e	12	197	2.1e-83	IPR000554	Ribosomal protein S7e
N_psidii_MA3_00855	708	Pfam	PF00241	Cofilin/tropomyosin-type actin-binding protein	389	508	8.3e-12	IPR002108	Actin-depolymerising factor homology domain
N_psidii_MA3_00855	708	Pfam	PF00241	Cofilin/tropomyosin-type actin-binding protein	561	688	1.6e-17	IPR002108	Actin-depolymerising factor homology domain
N_psidii_MA3_00856	324	Pfam	PF00153	Mitochondrial carrier protein	220	313	1.6e-21	IPR018108	Mitochondrial substrate/solute carrier
N_psidii_MA3_00856	324	Pfam	PF00153	Mitochondrial carrier protein	14	107	4e-20	IPR018108	Mitochondrial substrate/solute carrier
N_psidii_MA3_00856	324	Pfam	PF00153	Mitochondrial carrier protein	117	210	1.8e-20	IPR018108	Mitochondrial substrate/solute carrier
N_psidii_MA3_00857	712	Pfam	PF12937	F-box-like	215	258	2.5e-12	IPR001810	F-box domain
N_psidii_MA3_00857	712	Pfam	PF00400	WD domain, G-beta repeat	663	698	2.2e-05	IPR001680	WD40 repeat
N_psidii_MA3_00857	712	Pfam	PF00400	WD domain, G-beta repeat	369	402	3.1e-08	IPR001680	WD40 repeat
N_psidii_MA3_00857	712	Pfam	PF00400	WD domain, G-beta repeat	406	442	5e-06	IPR001680	WD40 repeat
N_psidii_MA3_00857	712	Pfam	PF00400	WD domain, G-beta repeat	488	523	0.00058	IPR001680	WD40 repeat
N_psidii_MA3_00857	712	Pfam	PF00400	WD domain, G-beta repeat	446	481	0.00027	IPR001680	WD40 repeat
N_psidii_MA3_00861	517	Pfam	PF07690	Major Facilitator Superfamily	76	461	8.9e-28	IPR011701	Major facilitator superfamily
N_psidii_MA3_00862	485	Pfam	PF01062	Bestrophin, RFP-TM, chloride channel	81	399	9.3e-34	IPR021134	Bestrophin/UPF0187
N_psidii_MA3_00865	255	Pfam	PF01979	Amidohydrolase family	3	233	2.5e-28	IPR006680	Amidohydrolase-related
N_psidii_MA3_00869	326	Pfam	PF11913	Protein of unknown function (DUF3431)	61	280	1.3e-88	IPR021838	Protein of unknown function DUF3431
N_psidii_MA3_00870	146	Pfam	PF06179	Surfeit locus protein 5 subunit 22 of Mediator complex	15	116	1.8e-23	IPR009332	Mediator of RNA polymerase II transcription subunit 22
N_psidii_MA3_00873	610	Pfam	PF01416	tRNA pseudouridine synthase	401	506	1.5e-07	IPR020097	Pseudouridine synthase I, TruA, alpha/beta domain
N_psidii_MA3_00879	519	Pfam	PF08192	Peptidase family S64	191	473	1.3e-09	IPR012985	Peptidase S64, Ssy5
N_psidii_MA3_00881	282	Pfam	PF13445	RING-type zinc-finger	99	150	1.1e-07	IPR027370	RING-type zinc-finger, LisH dimerisation motif
N_psidii_MA3_00882	320	Pfam	PF13640	2OG-Fe(II) oxygenase superfamily	187	308	2.1e-08	IPR005123	Oxoglutarate/iron-dependent dioxygenase
N_psidii_MA3_00887	317	Pfam	PF07992	Pyridine nucleotide-disulphide oxidoreductase	6	296	2.3e-12	IPR023753	FAD/NAD(P)-binding domain
N_psidii_MA3_00890	344	Pfam	PF05368	NmrA-like family	37	267	8e-18	IPR008030	NmrA-like domain
N_psidii_MA3_00891	326	Pfam	PF00172	Fungal Zn(2)-Cys(6) binuclear cluster domain	60	91	1.1e-06	IPR001138	Zn(2)-C6 fungal-type DNA-binding domain
N_psidii_MA3_00894	504	Pfam	PF00067	Cytochrome P450	55	492	9.6e-76	IPR001128	Cytochrome P450
N_psidii_MA3_00895	206	Pfam	PF00106	short chain dehydrogenase	21	174	3.3e-21	IPR002347	Short-chain dehydrogenase/reductase SDR
N_psidii_MA3_00897	692	Pfam	PF02386	Cation transport protein	294	684	5.8e-121	IPR003445	Cation transporter
N_psidii_MA3_00898	157	Pfam	PF00106	short chain dehydrogenase	11	148	1.8e-09	IPR002347	Short-chain dehydrogenase/reductase SDR
N_psidii_MA3_00899	523	Pfam	PF00026	Eukaryotic aspartyl protease	206	517	4.3e-67	IPR033121	Peptidase family A1 domain
N_psidii_MA3_00900	402	Pfam	PF01163	RIO1 family	26	220	2.6e-70
N_psidii_MA3_00901	764	Pfam	PF04082	Fungal specific transcription factor domain	259	400	2e-17	IPR007219	Transcription factor domain, fungi
N_psidii_MA3_00901	764	Pfam	PF00172	Fungal Zn(2)-Cys(6) binuclear cluster domain	35	69	1.5e-07	IPR001138	Zn(2)-C6 fungal-type DNA-binding domain
N_psidii_MA3_00903	1327	Pfam	PF05183	RNA dependent RNA polymerase	451	1105	5.3e-133	IPR007855	RNA-dependent RNA polymerase, eukaryotic-type
N_psidii_MA3_00906	601	Pfam	PF14269	Arylsulfotransferase (ASST)	115	405	6.3e-51
N_psidii_MA3_00910	1284	Pfam	PF07993	Male sterility protein	656	897	1.8e-59	IPR013120	Male sterility, NAD-binding
N_psidii_MA3_00910	1284	Pfam	PF00501	AMP-binding enzyme	14	419	9.7e-77	IPR000873	AMP-dependent synthetase/ligase
N_psidii_MA3_00910	1284	Pfam	PF00106	short chain dehydrogenase	1044	1236	1.3e-53	IPR002347	Short-chain dehydrogenase/reductase SDR
N_psidii_MA3_00910	1284	Pfam	PF00550	Phosphopantetheine attachment site	544	603	1.9e-10	IPR009081	Phosphopantetheine binding ACP domain
N_psidii_MA3_00913	283	Pfam	PF09362	Domain of unknown function (DUF1996)	106	282	2.6e-32	IPR018535	Domain of unknown function DUF1996
N_psidii_MA3_00914	515	Pfam	PF00324	Amino acid permease	43	499	1.4e-136	IPR004841	Amino acid permease/ SLC12A domain
N_psidii_MA3_00915	545	Pfam	PF04515	Plasma-membrane choline transporter	202	517	1.4e-84	IPR007603	Choline transporter-like
N_psidii_MA3_00916	512	Pfam	PF04108	Autophagy protein Apg17	40	465	2.4e-126	IPR007240	Autophagy-related protein 17
N_psidii_MA3_00917	976	Pfam	PF00648	Calpain family cysteine protease	134	442	5.8e-58	IPR001300	Peptidase C2, calpain, catalytic domain
N_psidii_MA3_00920	402	Pfam	PF03824	High-affinity nickel-transport protein	56	357	2.7e-68	IPR011541	Nickel/cobalt transporter, high-affinity
N_psidii_MA3_00921	122	Pfam	PF07876	Stress responsive A/B Barrel Domain	3	103	2.5e-13	IPR013097	Stress responsive alpha-beta barrel
N_psidii_MA3_00922	114	Pfam	PF02615	Malate/L-lactate dehydrogenase	1	99	4.9e-25	IPR003767	Malate/L-lactate dehydrogenase-like
N_psidii_MA3_00923	119	Pfam	PF00172	Fungal Zn(2)-Cys(6) binuclear cluster domain	59	88	2.6e-09	IPR001138	Zn(2)-C6 fungal-type DNA-binding domain
N_psidii_MA3_00924	609	Pfam	PF04082	Fungal specific transcription factor domain	114	285	1.4e-20	IPR007219	Transcription factor domain, fungi
N_psidii_MA3_00925	175	Pfam	PF03061	Thioesterase superfamily	70	142	7.7e-12	IPR006683	Thioesterase domain
N_psidii_MA3_00926	925	Pfam	PF00172	Fungal Zn(2)-Cys(6) binuclear cluster domain	18	57	0.00022	IPR001138	Zn(2)-C6 fungal-type DNA-binding domain
N_psidii_MA3_00926	925	Pfam	PF04082	Fungal specific transcription factor domain	216	452	1.6e-20	IPR007219	Transcription factor domain, fungi
N_psidii_MA3_00926	925	Pfam	PF09351	Domain of unknown function (DUF1993)	759	918	2.2e-53	IPR018531	Protein of unknown function DUF1993
N_psidii_MA3_00927	276	Pfam	PF13561	Enoyl-(Acyl carrier protein) reductase	41	273	1.1e-58
N_psidii_MA3_00928	291	Pfam	PF06414	Zeta toxin	71	112	1.2e-05	IPR010488	Zeta toxin domain
N_psidii_MA3_00929	300	Pfam	PF13561	Enoyl-(Acyl carrier protein) reductase	64	296	1.9e-48
N_psidii_MA3_00930	794	Pfam	PF05730	CFEM domain	28	95	4.1e-07	IPR008427	Extracellular membrane protein, CFEM domain
N_psidii_MA3_00930	794	Pfam	PF05730	CFEM domain	195	259	2.7e-10	IPR008427	Extracellular membrane protein, CFEM domain
N_psidii_MA3_00930	794	Pfam	PF05730	CFEM domain	462	528	4.9e-11	IPR008427	Extracellular membrane protein, CFEM domain
N_psidii_MA3_00930	794	Pfam	PF05730	CFEM domain	595	660	3e-09	IPR008427	Extracellular membrane protein, CFEM domain
N_psidii_MA3_00930	794	Pfam	PF05730	CFEM domain	329	393	1.4e-09	IPR008427	Extracellular membrane protein, CFEM domain
N_psidii_MA3_00931	280	Pfam	PF13468	Glyoxalase-like domain	11	200	4.6e-24	IPR025870	Glyoxalase-like domain
N_psidii_MA3_00933	347	Pfam	PF02668	Taurine catabolism dioxygenase TauD, TfdA family	52	314	4.5e-27	IPR003819	TauD/TfdA-like domain
N_psidii_MA3_00936	517	Pfam	PF02225	PA domain	159	243	2.8e-11	IPR003137	PA domain
N_psidii_MA3_00936	517	Pfam	PF04389	Peptidase family M28	271	480	2.1e-38	IPR007484	Peptidase M28
N_psidii_MA3_00937	683	Pfam	PF00856	SET domain	186	227	7.4e-10	IPR001214	SET domain
N_psidii_MA3_00938	131	Pfam	PF00238	Ribosomal protein L14p/L23e	1	128	1.6e-45	IPR000218	Ribosomal protein L14P
N_psidii_MA3_00939	131	Pfam	PF01096	Transcription factor S-II (TFIIS)	94	130	4e-15	IPR001222	Zinc finger, TFIIS-type
N_psidii_MA3_00939	131	Pfam	PF02150	RNA polymerases M/15 Kd subunit	24	60	3e-12	IPR001529	DNA-directed RNA polymerase, M/15kDa subunit
N_psidii_MA3_00940	177	Pfam	PF00397	WW domain	6	36	6.4e-08	IPR001202	WW domain
N_psidii_MA3_00940	177	Pfam	PF00639	PPIC-type PPIASE domain	73	175	1.4e-21	IPR000297	Peptidyl-prolyl cis-trans isomerase, PpiC-type
N_psidii_MA3_00941	588	Pfam	PF04172	LrgB-like family	527	572	1.7e-07	IPR007300	CidB/LrgB family
N_psidii_MA3_00941	588	Pfam	PF04172	LrgB-like family	297	477	5.4e-14	IPR007300	CidB/LrgB family
N_psidii_MA3_00943	279	Pfam	PF01507	Phosphoadenosine phosphosulfate reductase family	162	248	8.8e-21	IPR002500	Phosphoadenosine phosphosulphate reductase
N_psidii_MA3_00943	279	Pfam	PF01507	Phosphoadenosine phosphosulfate reductase family	77	156	2.9e-05	IPR002500	Phosphoadenosine phosphosulphate reductase
N_psidii_MA3_00944	1550	Pfam	PF12359	Protein of unknown function (DUF3645)	735	763	4.7e-17	IPR022105	Protein of unknown function DUF3645
N_psidii_MA3_00944	1550	Pfam	PF12340	Protein of unknown function (DUF3638)	385	608	2.5e-98	IPR022099	Protein of unknown function DUF3638
N_psidii_MA3_00945	547	Pfam	PF00083	Sugar (and other) transporter	63	509	1.2e-59	IPR005828	Major facilitator, sugar transporter-like
N_psidii_MA3_00947	344	Pfam	PF00153	Mitochondrial carrier protein	255	342	3.3e-15	IPR018108	Mitochondrial substrate/solute carrier
N_psidii_MA3_00947	344	Pfam	PF00153	Mitochondrial carrier protein	50	136	3.6e-18	IPR018108	Mitochondrial substrate/solute carrier
N_psidii_MA3_00947	344	Pfam	PF00153	Mitochondrial carrier protein	150	241	7.4e-18	IPR018108	Mitochondrial substrate/solute carrier
N_psidii_MA3_00950	390	Pfam	PF01650	Peptidase C13 family	29	259	2.8e-40	IPR001096	Peptidase C13, legumain
N_psidii_MA3_00951	700	Pfam	PF12657	Transcription factor IIIC subunit delta N-term	18	174	6.6e-23	IPR024761	Transcription factor IIIC, 90kDa subunit, N-terminal
N_psidii_MA3_00951	700	Pfam	PF12660	Putative zinc-finger of transcription factor IIIC complex	613	698	2.2e-11	IPR024764	Transcription factor IIIC, putative zinc-finger
N_psidii_MA3_00953	680	Pfam	PF14604	Variant SH3 domain	487	533	2.3e-11	IPR001452	SH3 domain
N_psidii_MA3_00955	338	Pfam	PF06966	Protein of unknown function (DUF1295)	233	296	7.9e-12	IPR010721	Protein of unknown function DUF1295
N_psidii_MA3_00956	536	Pfam	PF03969	AFG1-like ATPase	77	441	6.8e-92	IPR005654	ATPase, AFG1-like
N_psidii_MA3_00959	254	Pfam	PF13639	Ring finger domain	96	147	2.5e-06	IPR001841	Zinc finger, RING-type
N_psidii_MA3_00964	421	Pfam	PF00149	Calcineurin-like phosphoesterase	45	156	3.8e-22	IPR004843	Calcineurin-like phosphoesterase domain, ApaH type
N_psidii_MA3_00964	421	Pfam	PF00149	Calcineurin-like phosphoesterase	233	314	3.5e-06	IPR004843	Calcineurin-like phosphoesterase domain, ApaH type
N_psidii_MA3_00969	770	Pfam	PF10557	Cullin protein neddylation domain	702	764	5.2e-26	IPR019559	Cullin protein, neddylation domain
N_psidii_MA3_00969	770	Pfam	PF00888	Cullin family	24	671	8.7e-197	IPR001373	Cullin, N-terminal
N_psidii_MA3_00970	723	Pfam	PF09794	Transport protein Avl9	39	415	2.4e-142	IPR018307	AVL9/DENND6 domain
N_psidii_MA3_00975	355	Pfam	PF00503	G-protein alpha subunit	15	344	2.3e-117	IPR001019	Guanine nucleotide binding protein (G-protein), alpha subunit
N_psidii_MA3_00978	393	Pfam	PF04488	Glycosyltransferase sugar-binding region containing DXD motif	136	211	3e-13	IPR007577	Glycosyltransferase, DXD sugar-binding motif
N_psidii_MA3_00983	253	Pfam	PF11578	Protein of unknown function (DUF3237)	99	252	4.9e-22	IPR020915	Uncharacterised protein family UPF0311
N_psidii_MA3_00984	173	Pfam	PF12328	Rpp20 subunit of nuclear RNase MRP and P	46	168	8.4e-30	IPR014612	Ribonucleases P/MRP protein subunit Rpp20
N_psidii_MA3_00985	316	Pfam	PF10259	Rogdi leucine zipper containing protein	25	308	1e-90	IPR028241	RAVE subunit 2/Rogdi
N_psidii_MA3_00986	353	Pfam	PF07978	NIPSNAP	148	241	1.2e-09	IPR012577	NIPSNAP
N_psidii_MA3_00986	353	Pfam	PF07978	NIPSNAP	254	351	6.7e-30	IPR012577	NIPSNAP
N_psidii_MA3_00987	60	Pfam	PF04911	ATP synthase j chain	11	59	1.3e-27	IPR006995	ATP synthase, F0 complex, subunit J
N_psidii_MA3_00988	293	Pfam	PF03959	Serine hydrolase (FSH1)	52	276	5.9e-60	IPR005645	Serine hydrolase FSH
N_psidii_MA3_00989	409	Pfam	PF01399	PCI domain	253	364	2.3e-21	IPR000717	Proteasome component (PCI) domain
N_psidii_MA3_00991	766	Pfam	PF12796	Ankyrin repeats (3 copies)	339	421	8.2e-07	IPR020683	Ankyrin repeat-containing domain
N_psidii_MA3_00994	162	Pfam	PF08287	Spc19	8	145	1.6e-46	IPR013251	DASH complex subunit Spc19
N_psidii_MA3_00996	312	Pfam	PF00018	SH3 domain	259	306	1.4e-08	IPR001452	SH3 domain
N_psidii_MA3_00997	206	Pfam	PF07426	Dynactin subunit p22	16	172	3.8e-10	IPR009991	Dynactin subunit p22
N_psidii_MA3_00998	520	Pfam	PF01490	Transmembrane amino acid transporter protein	37	434	5e-90	IPR013057	Amino acid transporter, transmembrane domain
N_psidii_MA3_00999	114	Pfam	PF00886	Ribosomal protein S16	9	77	1.8e-26	IPR000307	Ribosomal protein S16
N_psidii_MA3_01000	236	Pfam	PF03853	YjeF-related protein N-terminus	27	189	1.5e-33	IPR004443	YjeF N-terminal domain
N_psidii_MA3_01006	488	Pfam	PF07690	Major Facilitator Superfamily	63	431	8.6e-39	IPR011701	Major facilitator superfamily
N_psidii_MA3_01008	568	Pfam	PF13520	Amino acid permease	41	485	1.2e-43	IPR002293	Amino acid/polyamine transporter I
N_psidii_MA3_01009	229	Pfam	PF13578	Methyltransferase domain	76	187	1.7e-13
N_psidii_MA3_01010	317	Pfam	PF00264	Common central domain of tyrosinase	68	259	4.3e-41	IPR002227	Tyrosinase copper-binding domain
N_psidii_MA3_01015	644	Pfam	PF06985	Heterokaryon incompatibility protein (HET)	185	329	1.5e-25	IPR010730	Heterokaryon incompatibility
N_psidii_MA3_01016	273	Pfam	PF04479	RTA1 like protein	40	253	6.5e-63	IPR007568	RTA-like protein
N_psidii_MA3_01020	546	Pfam	PF00324	Amino acid permease	45	505	5.3e-128	IPR004841	Amino acid permease/ SLC12A domain
N_psidii_MA3_01021	209	Pfam	PF00646	F-box domain	20	50	4.4e-05	IPR001810	F-box domain
N_psidii_MA3_01022	403	Pfam	PF07690	Major Facilitator Superfamily	4	302	6.3e-25	IPR011701	Major facilitator superfamily
N_psidii_MA3_01023	846	Pfam	PF13802	Galactose mutarotase-like	145	199	7.3e-13	IPR025887	Glycoside hydrolase family 31, N-terminal domain
N_psidii_MA3_01023	846	Pfam	PF01055	Glycosyl hydrolases family 31	234	717	7.3e-91	IPR000322	Glycoside hydrolase family 31
N_psidii_MA3_01024	694	Pfam	PF00172	Fungal Zn(2)-Cys(6) binuclear cluster domain	21	57	9.8e-09	IPR001138	Zn(2)-C6 fungal-type DNA-binding domain
N_psidii_MA3_01027	1291	Pfam	PF00689	Cation transporting ATPase, C-terminus	1071	1276	1.3e-43	IPR006068	Cation-transporting P-type ATPase, C-terminal
N_psidii_MA3_01027	1291	Pfam	PF00122	E1-E2 ATPase	419	615	2e-36
N_psidii_MA3_01027	1291	Pfam	PF13246	Cation transport ATPase (P-type)	688	780	2.9e-19
N_psidii_MA3_01027	1291	Pfam	PF00702	haloacid dehalogenase-like hydrolase	954	1002	1.2e-07
N_psidii_MA3_01027	1291	Pfam	PF00690	Cation transporter/ATPase, N-terminus	302	368	1.3e-11	IPR004014	Cation-transporting P-type ATPase, N-terminal
N_psidii_MA3_01033	213	Pfam	PF00085	Thioredoxin	10	105	1.3e-25	IPR013766	Thioredoxin domain
N_psidii_MA3_01034	341	Pfam	PF02598	Putative RNA methyltransferase	40	334	1.3e-105	IPR003750	Putative RNA methyltransferase
N_psidii_MA3_01035	771	Pfam	PF12708	Pectate lyase superfamily protein	41	266	7.7e-72	IPR024535	Pectate lyase superfamily protein
N_psidii_MA3_01037	413	Pfam	PF04055	Radical SAM superfamily	153	312	2e-13	IPR007197	Radical SAM
N_psidii_MA3_01037	413	Pfam	PF16881	N-terminal domain of lipoyl synthase of Radical_SAM family	46	129	2.1e-17	IPR031691	Lipoyl synthase, N-terminal
N_psidii_MA3_01041	579	Pfam	PF14824	Sirohaem biosynthesis protein central	135	161	1.7e-11	IPR028281	Siroheme synthase, central domain
N_psidii_MA3_01041	579	Pfam	PF14823	Sirohaem biosynthesis protein C-terminal	164	252	6.1e-11	IPR028162	Siroheme biosynthesis protein Met8, C-terminal
N_psidii_MA3_01041	579	Pfam	PF00590	Tetrapyrrole (Corrin/Porphyrin) Methylases	271	518	1.7e-45	IPR000878	Tetrapyrrole methylase
N_psidii_MA3_01041	579	Pfam	PF13241	Putative NAD(P)-binding	10	128	7.9e-15	IPR006367	Sirohaem synthase, N-terminal
N_psidii_MA3_01045	421	Pfam	PF00155	Aminotransferase class I and II	82	407	4.7e-46	IPR004839	Aminotransferase, class I/classII
N_psidii_MA3_01049	740	Pfam	PF04082	Fungal specific transcription factor domain	145	321	3.3e-06	IPR007219	Transcription factor domain, fungi
N_psidii_MA3_01051	876	Pfam	PF03810	Importin-beta N-terminal domain	24	104	3.1e-07	IPR001494	Importin-beta, N-terminal domain
N_psidii_MA3_01051	876	Pfam	PF13513	HEAT-like repeat	384	439	1.1e-07
N_psidii_MA3_01053	623	Pfam	PF08502	LeuA allosteric (dimerisation) domain	433	577	4.5e-26	IPR013709	2-isopropylmalate synthase LeuA, allosteric (dimerisation) domain
N_psidii_MA3_01053	623	Pfam	PF00682	HMGL-like	33	317	1.1e-81	IPR000891	Pyruvate carboxyltransferase
N_psidii_MA3_01058	786	Pfam	PF00365	Phosphofructokinase	6	316	1.6e-106	IPR000023	Phosphofructokinase domain
N_psidii_MA3_01058	786	Pfam	PF00365	Phosphofructokinase	398	694	8.6e-82	IPR000023	Phosphofructokinase domain
N_psidii_MA3_01060	632	Pfam	PF10156	Subunit 17 of Mediator complex	20	425	4e-94	IPR019313	Mediator complex, subunit Med17
N_psidii_MA3_01061	1160	Pfam	PF13920	Zinc finger, C3HC4 type (RING finger)	803	861	1.6e-06
N_psidii_MA3_01061	1160	Pfam	PF00271	Helicase conserved C-terminal domain	989	1102	6.5e-14	IPR001650	Helicase, C-terminal
N_psidii_MA3_01061	1160	Pfam	PF00176	SNF2 family N-terminal domain	464	765	7e-58	IPR000330	SNF2-related, N-terminal domain
N_psidii_MA3_01063	790	Pfam	PF01663	Type I phosphodiesterase / nucleotide pyrophosphatase	248	587	1.3e-93	IPR002591	Type I phosphodiesterase/nucleotide pyrophosphatase/phosphate transferase
N_psidii_MA3_01064	404	Pfam	PF00172	Fungal Zn(2)-Cys(6) binuclear cluster domain	16	54	1e-06	IPR001138	Zn(2)-C6 fungal-type DNA-binding domain
N_psidii_MA3_01065	307	Pfam	PF05368	NmrA-like family	6	241	1.7e-41	IPR008030	NmrA-like domain
N_psidii_MA3_01067	627	Pfam	PF03663	Glycosyl hydrolase family 76	40	404	1e-159	IPR005198	Glycoside hydrolase, family 76
N_psidii_MA3_01070	113	Pfam	PF00957	Synaptobrevin	23	109	3.7e-33	IPR001388	Synaptobrevin
N_psidii_MA3_01072	881	Pfam	PF00696	Amino acid kinase family	88	301	6.3e-32	IPR001048	Aspartate/glutamate/uridylate kinase
N_psidii_MA3_01072	881	Pfam	PF04768	NAT, N-acetyltransferase, of N-acetylglutamate synthase	320	475	2.3e-46	IPR006855	Vertebrate-like NAGS Gcn5-related N-acetyltransferase (GNAT) domain
N_psidii_MA3_01072	881	Pfam	PF01118	Semialdehyde dehydrogenase, NAD binding domain	564	690	1.2e-28	IPR000534	Semialdehyde dehydrogenase, NAD-binding
N_psidii_MA3_01073	527	Pfam	PF00067	Cytochrome P450	97	503	5.7e-60	IPR001128	Cytochrome P450
N_psidii_MA3_01074	332	Pfam	PF00378	Enoyl-CoA hydratase/isomerase	153	315	1.4e-19	IPR001753	Crotonase superfamily
N_psidii_MA3_01075	321	Pfam	PF11790	Glycosyl hydrolase catalytic core	34	284	8.6e-57	IPR024655	Uncharacterised protein family, glycosyl hydrolase catalytic domain
N_psidii_MA3_01077	293	Pfam	PF01476	LysM domain	206	238	3e-05	IPR018392	LysM domain
N_psidii_MA3_01080	1175	Pfam	PF13087	AAA domain	827	1045	7.4e-24
N_psidii_MA3_01080	1175	Pfam	PF13086	AAA domain	488	810	3.2e-20
N_psidii_MA3_01081	608	Pfam	PF12831	FAD dependent oxidoreductase	6	511	2.6e-93	IPR023753	FAD/NAD(P)-binding domain
N_psidii_MA3_01084	267	Pfam	PF01738	Dienelactone hydrolase family	60	265	2.4e-26	IPR002925	Dienelactone hydrolase
N_psidii_MA3_01085	532	Pfam	PF09458	H-type lectin domain	373	436	2.7e-23	IPR019019	H-type lectin domain
N_psidii_MA3_01085	532	Pfam	PF09458	H-type lectin domain	466	531	6.3e-16	IPR019019	H-type lectin domain
N_psidii_MA3_01085	532	Pfam	PF09458	H-type lectin domain	278	340	2.1e-15	IPR019019	H-type lectin domain
N_psidii_MA3_01089	295	Pfam	PF00076	RNA recognition motif. (a.k.a. RRM, RBD, or RNP domain)	83	150	1e-15	IPR000504	RNA recognition motif domain
N_psidii_MA3_01092	410	Pfam	PF02469	Fasciclin domain	36	177	3.3e-14	IPR000782	FAS1 domain
N_psidii_MA3_01092	410	Pfam	PF02469	Fasciclin domain	193	314	5.6e-20	IPR000782	FAS1 domain
N_psidii_MA3_01095	484	Pfam	PF00722	Glycosyl hydrolases family 16	216	391	1.6e-16	IPR000757	Glycoside hydrolase family 16
N_psidii_MA3_01098	883	Pfam	PF13632	Glycosyl transferase family group 2	500	706	5.6e-51	IPR001173	Glycosyltransferase 2-like
N_psidii_MA3_01099	659	Pfam	PF01529	DHHC palmitoyltransferase	448	573	1.2e-37	IPR001594	Palmitoyltransferase, DHHC domain
N_psidii_MA3_01101	480	Pfam	PF12710	haloacid dehalogenase-like hydrolase	262	434	3.2e-20
N_psidii_MA3_01104	316	Pfam	PF01507	Phosphoadenosine phosphosulfate reductase family	80	261	8.6e-42	IPR002500	Phosphoadenosine phosphosulphate reductase
N_psidii_MA3_01105	315	Pfam	PF02676	Methyltransferase TYW3	13	247	3.8e-75	IPR003827	tRNA wybutosine-synthesizing protein
N_psidii_MA3_01106	584	Pfam	PF07956	Protein of Unknown function (DUF1690)	436	571	2.8e-42	IPR012471	Protein of unknown function DUF1690
N_psidii_MA3_01108	624	Pfam	PF08022	FAD-binding domain	360	466	1.8e-08	IPR013112	FAD-binding 8
N_psidii_MA3_01108	624	Pfam	PF01794	Ferric reductase like transmembrane component	184	302	4.8e-23	IPR013130	Ferric reductase transmembrane component-like domain
N_psidii_MA3_01108	624	Pfam	PF08030	Ferric reductase NAD binding domain	478	605	5.1e-16	IPR013121	Ferric reductase, NAD binding domain
N_psidii_MA3_01109	623	Pfam	PF14269	Arylsulfotransferase (ASST)	92	391	7.8e-68
N_psidii_MA3_01110	505	Pfam	PF07690	Major Facilitator Superfamily	63	463	1.7e-41	IPR011701	Major facilitator superfamily
N_psidii_MA3_01113	494	Pfam	PF00958	GMP synthase C terminal domain	356	442	2.8e-37	IPR001674	GMP synthase, C-terminal
N_psidii_MA3_01113	494	Pfam	PF02540	NAD synthase	134	200	2.1e-06	IPR022310	NAD/GMP synthase
N_psidii_MA3_01113	494	Pfam	PF00117	Glutamine amidotransferase class-I	8	107	1e-17	IPR017926	Glutamine amidotransferase
N_psidii_MA3_01115	454	Pfam	PF05034	Methylaspartate ammonia-lyase N-terminus	35	193	4.9e-54	IPR022665	Methylaspartate ammonia-lyase, N-terminal
N_psidii_MA3_01115	454	Pfam	PF07476	Methylaspartate ammonia-lyase C-terminus	196	441	4.4e-104	IPR022662	Methylaspartate ammonia-lyase, C-terminal
N_psidii_MA3_01118	542	Pfam	PF07690	Major Facilitator Superfamily	89	463	1.1e-32	IPR011701	Major facilitator superfamily
N_psidii_MA3_01121	205	Pfam	PF11807	Domain of unknown function (DUF3328)	55	191	9.4e-30	IPR021765	Mycotoxin biosynthesis protein UstYa-like
N_psidii_MA3_01123	725	Pfam	PF04825	N terminus of Rad21 / Rec8 like protein	1	109	7.3e-33	IPR006910	Rad21/Rec8-like protein, N-terminal
N_psidii_MA3_01125	345	Pfam	PF01138	3' exoribonuclease family, domain 1	50	227	1e-19	IPR001247	Exoribonuclease, phosphorolytic domain 1
N_psidii_MA3_01127	867	Pfam	PF08022	FAD-binding domain	384	482	4.1e-12	IPR013112	FAD-binding 8
N_psidii_MA3_01127	867	Pfam	PF01794	Ferric reductase like transmembrane component	213	335	4.1e-19	IPR013130	Ferric reductase transmembrane component-like domain
N_psidii_MA3_01127	867	Pfam	PF08030	Ferric reductase NAD binding domain	491	570	1.9e-09	IPR013121	Ferric reductase, NAD binding domain
N_psidii_MA3_01129	153	Pfam	PF02391	MoaE protein	20	122	3e-26	IPR003448	Molybdopterin biosynthesis MoaE
N_psidii_MA3_01130	753	Pfam	PF01585	G-patch domain	672	715	3.7e-10	IPR000467	G-patch domain
N_psidii_MA3_01130	753	Pfam	PF00076	RNA recognition motif. (a.k.a. RRM, RBD, or RNP domain)	311	348	4.1e-05	IPR000504	RNA recognition motif domain
N_psidii_MA3_01131	469	Pfam	PF00026	Eukaryotic aspartyl protease	54	408	2.6e-65	IPR033121	Peptidase family A1 domain
N_psidii_MA3_01136	351	Pfam	PF13622	Thioesterase-like superfamily	45	338	5.8e-82
N_psidii_MA3_01137	1242	Pfam	PF01237	Oxysterol-binding protein	841	1215	9.5e-136	IPR000648	Oxysterol-binding protein
N_psidii_MA3_01137	1242	Pfam	PF00169	PH domain	384	476	1.5e-11	IPR001849	Pleckstrin homology domain
N_psidii_MA3_01137	1242	Pfam	PF13857	Ankyrin repeats (many copies)	175	226	1.5e-10
N_psidii_MA3_01139	697	Pfam	PF00704	Glycosyl hydrolases family 18	21	299	8.9e-21	IPR001223	Glycoside hydrolase family 18, catalytic domain
N_psidii_MA3_01142	346	Pfam	PF02678	Pirin	81	197	1.2e-25	IPR003829	Pirin, N-terminal domain
N_psidii_MA3_01143	825	Pfam	PF11915	Protein of unknown function (DUF3433)	606	697	8.5e-29	IPR021840	Protein of unknown function DUF3433
N_psidii_MA3_01143	825	Pfam	PF11915	Protein of unknown function (DUF3433)	307	393	6.7e-06	IPR021840	Protein of unknown function DUF3433
N_psidii_MA3_01148	526	Pfam	PF05653	Magnesium transporter NIPA	16	308	2.9e-15	IPR008521	Magnesium transporter NIPA
N_psidii_MA3_01149	229	Pfam	PF01991	ATP synthase (E/31 kDa) subunit	21	219	1e-69	IPR002842	ATPase, V1/A1 complex, subunit E
N_psidii_MA3_01152	1526	Pfam	PF16212	Phospholipid-translocating P-type ATPase C-terminal	1113	1362	5.2e-80	IPR032630	P-type ATPase, C-terminal
N_psidii_MA3_01152	1526	Pfam	PF13246	Cation transport ATPase (P-type)	762	842	4.4e-12
N_psidii_MA3_01152	1526	Pfam	PF16209	Phospholipid-translocating ATPase N-terminal	116	166	2.7e-18	IPR032631	P-type ATPase, N-terminal
N_psidii_MA3_01153	608	Pfam	PF00171	Aldehyde dehydrogenase family	87	551	2.7e-116	IPR015590	Aldehyde dehydrogenase domain
N_psidii_MA3_01154	592	Pfam	PF00271	Helicase conserved C-terminal domain	353	465	1.1e-24	IPR001650	Helicase, C-terminal
N_psidii_MA3_01154	592	Pfam	PF00270	DEAD/DEAH box helicase	127	315	6.4e-44	IPR011545	DEAD/DEAH box helicase domain
N_psidii_MA3_01155	342	Pfam	PF12333	Rix1 complex component involved in 60S ribosome maturation	131	229	2.3e-27	IPR024679	Pre-rRNA-processing protein IPI1/Testis-expressed sequence 10 protein
N_psidii_MA3_01156	136	Pfam	PF03259	Roadblock/LC7 domain	79	130	1.7e-05	IPR004942	Roadblock/LAMTOR2 domain
N_psidii_MA3_01159	117	Pfam	PF03669	Uncharacterised protein family (UPF0139)	4	91	5.3e-09	IPR005351	Uncharacterised protein family UPF0139
N_psidii_MA3_01162	437	Pfam	PF02265	S1/P1 Nuclease	155	421	1.2e-68	IPR003154	S1/P1 nuclease
N_psidii_MA3_01163	321	Pfam	PF04193	PQ loop repeat	23	79	7e-17	IPR006603	PQ-loop repeat
N_psidii_MA3_01163	321	Pfam	PF04193	PQ loop repeat	224	280	1.7e-19	IPR006603	PQ-loop repeat
N_psidii_MA3_01164	362	Pfam	PF01118	Semialdehyde dehydrogenase, NAD binding domain	9	132	1.7e-29	IPR000534	Semialdehyde dehydrogenase, NAD-binding
N_psidii_MA3_01164	362	Pfam	PF02774	Semialdehyde dehydrogenase, dimerisation domain	165	342	8.3e-41	IPR012280	Semialdehyde dehydrogenase, dimerisation domain
N_psidii_MA3_01169	305	Pfam	PF07264	Etoposide-induced protein 2.4 (EI24)	56	267	4.8e-11
N_psidii_MA3_01170	451	Pfam	PF05147	Lanthionine synthetase C-like protein	111	383	1.7e-26	IPR007822	Lanthionine synthetase C-like
N_psidii_MA3_01172	416	Pfam	PF00172	Fungal Zn(2)-Cys(6) binuclear cluster domain	118	149	7.6e-08	IPR001138	Zn(2)-C6 fungal-type DNA-binding domain
N_psidii_MA3_01178	767	Pfam	PF02225	PA domain	219	289	2.6e-09	IPR003137	PA domain
N_psidii_MA3_01178	767	Pfam	PF13639	Ring finger domain	627	671	2.7e-12	IPR001841	Zinc finger, RING-type
N_psidii_MA3_01179	309	Pfam	PF05336	L-rhamnose mutarotase	197	308	1.4e-36	IPR008000	Rhamnose/fucose mutarotase
N_psidii_MA3_01183	566	Pfam	PF01039	Carboxyl transferase domain	87	547	4.9e-134	IPR034733	Acetyl-CoA carboxylase
N_psidii_MA3_01184	426	Pfam	PF00441	Acyl-CoA dehydrogenase, C-terminal domain	269	417	3.1e-40	IPR009075	Acyl-CoA dehydrogenase/oxidase C-terminal
N_psidii_MA3_01184	426	Pfam	PF02771	Acyl-CoA dehydrogenase, N-terminal domain	45	157	2.5e-32	IPR013786	Acyl-CoA dehydrogenase/oxidase, N-terminal
N_psidii_MA3_01184	426	Pfam	PF02770	Acyl-CoA dehydrogenase, middle domain	162	257	1.6e-27	IPR006091	Acyl-CoA oxidase/dehydrogenase, central domain
N_psidii_MA3_01186	345	Pfam	PF13561	Enoyl-(Acyl carrier protein) reductase	94	343	1.9e-55
N_psidii_MA3_01195	598	Pfam	PF00628	PHD-finger	135	174	3.2e-09	IPR019787	Zinc finger, PHD-finger
N_psidii_MA3_01196	337	Pfam	PF01926	50S ribosome-binding GTPase	129	211	6.6e-13	IPR006073	GTP binding domain
N_psidii_MA3_01197	606	Pfam	PF00955	HCO3- transporter family	256	514	6.8e-38	IPR011531	Bicarbonate transporter, C-terminal
N_psidii_MA3_01197	606	Pfam	PF00955	HCO3- transporter family	80	250	8.2e-33	IPR011531	Bicarbonate transporter, C-terminal
N_psidii_MA3_01200	214	Pfam	PF00107	Zinc-binding dehydrogenase	20	147	3.5e-14	IPR013149	Alcohol dehydrogenase, C-terminal
N_psidii_MA3_01201	717	Pfam	PF16797	Fungal kinase associated-1 domain	581	701	2.2e-42	IPR031850	Fungal kinase associated-1 domain
N_psidii_MA3_01202	454	Pfam	PF00069	Protein kinase domain	118	392	6e-65	IPR000719	Protein kinase domain
N_psidii_MA3_01204	269	Pfam	PF01636	Phosphotransferase enzyme family	128	183	5.6e-09	IPR002575	Aminoglycoside phosphotransferase
N_psidii_MA3_01206	234	Pfam	PF00069	Protein kinase domain	103	170	7.7e-10	IPR000719	Protein kinase domain
N_psidii_MA3_01210	296	Pfam	PF01375	Heat-labile enterotoxin alpha chain	57	274	6.8e-48	IPR001144	Heat-labile enterotoxin, A chain
N_psidii_MA3_01212	358	Pfam	PF04675	DNA ligase N terminus	41	202	1.3e-17	IPR012308	DNA ligase, ATP-dependent, N-terminal
N_psidii_MA3_01214	346	Pfam	PF14226	non-haem dioxygenase in morphine synthesis N-terminal	7	111	2.9e-22	IPR026992	Non-haem dioxygenase N-terminal domain
N_psidii_MA3_01214	346	Pfam	PF03171	2OG-Fe(II) oxygenase superfamily	171	289	3.1e-14	IPR005123	Oxoglutarate/iron-dependent dioxygenase
N_psidii_MA3_01216	730	Pfam	PF12246	Temperature dependent protein affecting M2 dsRNA replication	485	726	2.9e-69	IPR022039	Temperature dependent protein affecting M2 dsRNA replication, C-terminal
N_psidii_MA3_01216	730	Pfam	PF12247	Temperature dependent protein affecting M2 dsRNA replication	315	403	1.6e-31	IPR022040	Temperature dependent protein affecting M2 dsRNA replication, N-terminal
N_psidii_MA3_01216	730	Pfam	PF00752	XPG N-terminal domain	16	97	0.00021	IPR006085	XPG N-terminal
N_psidii_MA3_01219	318	Pfam	PF13668	Ferritin-like domain	49	183	1.4e-39
N_psidii_MA3_01222	1355	Pfam	PF00773	RNB domain	738	1071	4.2e-77
N_psidii_MA3_01224	523	Pfam	PF07817	GLE1-like protein	217	488	7e-65	IPR012476	GLE1-like
N_psidii_MA3_01225	242	Pfam	PF05739	SNARE domain	186	238	2.6e-06	IPR000727	Target SNARE coiled-coil homology domain
N_psidii_MA3_01225	242	Pfam	PF09177	Syntaxin 6, N-terminal	9	107	9.8e-26	IPR015260	Syntaxin 6, N-terminal
N_psidii_MA3_01226	589	Pfam	PF13679	Methyltransferase domain	134	348	2.6e-22	IPR025714	Methyltransferase domain
N_psidii_MA3_01228	391	Pfam	PF13840	ACT domain	103	162	1e-17	IPR027795	GATS-like ACT domain
N_psidii_MA3_01230	1295	Pfam	PF16886	ATPsynthase alpha/beta subunit N-term extension	784	905	3.7e-47	IPR031686	ATPsynthase alpha/beta subunit, N-terminal extension
N_psidii_MA3_01230	1295	Pfam	PF00743	Flavin-binding monooxygenase-like	7	354	4.8e-38	IPR020946	Flavin monooxygenase-like
N_psidii_MA3_01230	1295	Pfam	PF02874	ATP synthase alpha/beta family, beta-barrel domain	706	768	3.8e-13	IPR004100	ATPase, F1/V1/A1 complex, alpha/beta subunit, N-terminal domain
N_psidii_MA3_01230	1295	Pfam	PF00006	ATP synthase alpha/beta family, nucleotide-binding domain	914	1139	5.1e-107	IPR000194	ATPase, F1/V1/A1 complex, alpha/beta subunit, nucleotide-binding domain
N_psidii_MA3_01231	636	Pfam	PF00149	Calcineurin-like phosphoesterase	162	427	9.4e-12	IPR004843	Calcineurin-like phosphoesterase domain, ApaH type
N_psidii_MA3_01232	598	Pfam	PF00172	Fungal Zn(2)-Cys(6) binuclear cluster domain	17	55	1e-05	IPR001138	Zn(2)-C6 fungal-type DNA-binding domain
N_psidii_MA3_01232	598	Pfam	PF04082	Fungal specific transcription factor domain	133	286	1.7e-09	IPR007219	Transcription factor domain, fungi
N_psidii_MA3_01233	665	Pfam	PF07287	Acyclic terpene utilisation family protein AtuA	169	351	1.6e-10	IPR010839	Acyclic terpene utilisation
N_psidii_MA3_01233	665	Pfam	PF14330	Domain of unknown function (DUF4387)	550	651	1.5e-32	IPR025496	Protein of unknown function DUF4387
N_psidii_MA3_01234	562	Pfam	PF00083	Sugar (and other) transporter	81	527	1.3e-63	IPR005828	Major facilitator, sugar transporter-like
N_psidii_MA3_01235	1039	Pfam	PF08634	Mitochondrial protein Pet127	299	571	1.5e-116	IPR013943	Mitochondrial protein Pet127
N_psidii_MA3_01236	869	Pfam	PF12722	High-temperature-induced dauer-formation protein	1	821	1.5e-301	IPR026705	Hid-1/Ecm30
N_psidii_MA3_01237	1060	Pfam	PF04048	Sec8 exocyst complex component specific domain	73	212	2.2e-47	IPR007191	Sec8 exocyst complex component specific domain
N_psidii_MA3_01239	525	Pfam	PF09346	SMI1 / KNR4 family (SUKH-1)	161	338	3.3e-31	IPR018958	Knr4/Smi1-like domain
N_psidii_MA3_01247	151	Pfam	PF12855	Life-span regulatory factor	9	38	3.5e-08	IPR024368	Life-span regulatory factor
N_psidii_MA3_01252	540	Pfam	PF00118	TCP-1/cpn60 chaperonin family	32	526	2e-173	IPR002423	Chaperonin Cpn60/TCP-1 family
N_psidii_MA3_01253	202	Pfam	PF06658	Protein of unknown function (DUF1168)	43	171	1.1e-38	IPR009548	Protein of unknown function DUF1168
N_psidii_MA3_01255	484	Pfam	PF00300	Histidine phosphatase superfamily (branch 1)	7	213	1.4e-28	IPR013078	Histidine phosphatase superfamily, clade-1
N_psidii_MA3_01256	2072	Pfam	PF13426	PAS domain	1203	1244	0.083	IPR000014	PAS domain
N_psidii_MA3_01256	2072	Pfam	PF00072	Response regulator receiver domain	1951	2067	2.5e-21	IPR001789	Signal transduction response regulator, receiver domain
N_psidii_MA3_01256	2072	Pfam	PF08447	PAS fold	1083	1165	4.1e-12	IPR013655	PAS fold-3
N_psidii_MA3_01256	2072	Pfam	PF02518	Histidine kinase-, DNA gyrase B-, and HSP90-like ATPase	1514	1632	9.7e-25	IPR003594	Histidine kinase/HSP90-like ATPase
N_psidii_MA3_01256	2072	Pfam	PF00512	His Kinase A (phospho-acceptor) domain	1402	1467	1.8e-18	IPR003661	Signal transduction histidine kinase, dimerisation/phosphoacceptor domain
N_psidii_MA3_01257	254	Pfam	PF03188	Eukaryotic cytochrome b561	81	211	1.5e-17	IPR006593	Cytochrome b561/ferric reductase transmembrane
N_psidii_MA3_01258	357	Pfam	PF03561	Allantoicase repeat	41	193	1.4e-45	IPR015908	Allantoicase domain
N_psidii_MA3_01258	357	Pfam	PF03561	Allantoicase repeat	215	353	1.1e-40	IPR015908	Allantoicase domain
N_psidii_MA3_01259	817	Pfam	PF01843	DIL domain	538	660	2.5e-32	IPR002710	Dilute domain
N_psidii_MA3_01259	817	Pfam	PF12796	Ankyrin repeats (3 copies)	126	193	5.8e-10	IPR020683	Ankyrin repeat-containing domain
N_psidii_MA3_01262	1072	Pfam	PF00566	Rab-GTPase-TBC domain	801	990	4.7e-35	IPR000195	Rab-GTPase-TBC domain
N_psidii_MA3_01271	2567	Pfam	PF13191	AAA ATPase domain	586	790	8.1e-12
N_psidii_MA3_01271	2567	Pfam	PF02518	Histidine kinase-, DNA gyrase B-, and HSP90-like ATPase	2054	2170	1.8e-31	IPR003594	Histidine kinase/HSP90-like ATPase
N_psidii_MA3_01271	2567	Pfam	PF00072	Response regulator receiver domain	2220	2339	1.2e-20	IPR001789	Signal transduction response regulator, receiver domain
N_psidii_MA3_01271	2567	Pfam	PF13185	GAF domain	1733	1880	9.1e-12	IPR003018	GAF domain
N_psidii_MA3_01271	2567	Pfam	PF00069	Protein kinase domain	229	393	1.5e-07	IPR000719	Protein kinase domain
N_psidii_MA3_01271	2567	Pfam	PF00512	His Kinase A (phospho-acceptor) domain	1940	2003	8.4e-18	IPR003661	Signal transduction histidine kinase, dimerisation/phosphoacceptor domain
N_psidii_MA3_01273	624	Pfam	PF01593	Flavin containing amine oxidoreductase	127	383	7.4e-06	IPR002937	Amine oxidase
N_psidii_MA3_01277	403	Pfam	PF03151	Triose-phosphate Transporter family	39	325	3.3e-25	IPR004853	Sugar phosphate transporter domain
N_psidii_MA3_01278	135	Pfam	PF01777	Ribosomal L27e protein family	51	135	3e-36	IPR001141	Ribosomal protein L27e
N_psidii_MA3_01279	58	Pfam	PF11654	Non-classical export protein 1	6	42	3.9e-10	IPR024242	Non-classical export protein 1
N_psidii_MA3_01282	418	Pfam	PF00903	Glyoxalase/Bleomycin resistance protein/Dioxygenase superfamily	215	371	2.9e-15	IPR004360	Glyoxalase/fosfomycin resistance/dioxygenase domain
N_psidii_MA3_01282	418	Pfam	PF00903	Glyoxalase/Bleomycin resistance protein/Dioxygenase superfamily	38	152	0.00026	IPR004360	Glyoxalase/fosfomycin resistance/dioxygenase domain
N_psidii_MA3_01283	467	Pfam	PF07975	TFIIH C1-like domain	377	441	1.6e-19	IPR004595	TFIIH C1-like domain
N_psidii_MA3_01283	467	Pfam	PF04056	Ssl1-like	100	297	1.4e-74	IPR007198	Ssl1-like
N_psidii_MA3_01284	295	Pfam	PF12271	Chitin synthase III catalytic subunit	6	291	6.5e-116	IPR022057	Chitin synthase III catalytic subunit
N_psidii_MA3_01288	565	Pfam	PF00083	Sugar (and other) transporter	22	461	2.1e-103	IPR005828	Major facilitator, sugar transporter-like
N_psidii_MA3_01290	216	Pfam	PF01491	Frataxin-like domain	81	209	7.5e-35	IPR002908	Frataxin/CyaY
N_psidii_MA3_01291	188	Pfam	PF01217	Clathrin adaptor complex small chain	1	158	8.7e-42	IPR022775	AP complex, mu/sigma subunit
N_psidii_MA3_01293	1121	Pfam	PF08264	Anticodon-binding domain of tRNA	835	962	5.9e-12	IPR013155	Methionyl/Valyl/Leucyl/Isoleucyl-tRNA synthetase, anticodon-binding
N_psidii_MA3_01293	1121	Pfam	PF00133	tRNA synthetases class I (I, L, M and V)	66	132	2.1e-07	IPR002300	Aminoacyl-tRNA synthetase, class Ia
N_psidii_MA3_01293	1121	Pfam	PF00133	tRNA synthetases class I (I, L, M and V)	221	793	5.2e-27	IPR002300	Aminoacyl-tRNA synthetase, class Ia
N_psidii_MA3_01297	85	Pfam	PF05207	CSL zinc finger	11	65	1.3e-23	IPR007872	Zinc finger, DPH-type
N_psidii_MA3_01298	702	Pfam	PF06472	ABC transporter transmembrane region 2	81	360	9.1e-107	IPR011527	ABC transporter type 1, transmembrane domain
N_psidii_MA3_01298	702	Pfam	PF00005	ABC transporter	474	616	3.4e-16	IPR003439	ABC transporter-like
N_psidii_MA3_01300	588	Pfam	PF01485	IBR domain, a half RING-finger domain	531	580	7e-09	IPR002867	IBR domain
N_psidii_MA3_01300	588	Pfam	PF01485	IBR domain, a half RING-finger domain	386	447	9e-12	IPR002867	IBR domain
N_psidii_MA3_01304	576	Pfam	PF00012	Hsp70 protein	124	400	3.7e-15	IPR013126	Heat shock protein 70 family
N_psidii_MA3_01306	2026	Pfam	PF14429	C2 domain in Dock180 and Zizimin proteins	609	803	5.1e-34	IPR027007	DHR-1 domain
N_psidii_MA3_01306	2026	Pfam	PF06920	Dock homology region 2	1437	1836	5.8e-33	IPR010703	Dedicator of cytokinesis, C-terminal
N_psidii_MA3_01306	2026	Pfam	PF16172	DOCK N-terminus	174	606	7.8e-122	IPR032376	Dedicator of cytokinesis, N-terminal domain
N_psidii_MA3_01306	2026	Pfam	PF00018	SH3 domain	13	48	1.9e-05	IPR001452	SH3 domain
N_psidii_MA3_01307	236	Pfam	PF05630	Necrosis inducing protein (NPP1)	49	234	1.6e-65	IPR008701	Necrosis inducing protein
N_psidii_MA3_01309	213	Pfam	PF00177	Ribosomal protein S7p/S5e	69	213	1.8e-37	IPR023798	Ribosomal protein S7 domain
N_psidii_MA3_01310	96	Pfam	PF03297	S25 ribosomal protein	4	91	1.7e-36	IPR004977	Ribosomal protein S25
N_psidii_MA3_01312	315	Pfam	PF00153	Mitochondrial carrier protein	14	109	5.2e-23	IPR018108	Mitochondrial substrate/solute carrier
N_psidii_MA3_01312	315	Pfam	PF00153	Mitochondrial carrier protein	219	307	1.2e-16	IPR018108	Mitochondrial substrate/solute carrier
N_psidii_MA3_01312	315	Pfam	PF00153	Mitochondrial carrier protein	118	210	1.3e-23	IPR018108	Mitochondrial substrate/solute carrier
N_psidii_MA3_01314	138	Pfam	PF09415	CENP-S associating Centromere protein X	72	137	4.8e-24	IPR018552	Centromere protein X
N_psidii_MA3_01317	261	Pfam	PF00173	Cytochrome b5-like Heme/Steroid binding domain	98	159	5.3e-12	IPR001199	Cytochrome b5-like heme/steroid binding domain
N_psidii_MA3_01322	391	Pfam	PF00004	ATPase family associated with various cellular activities (AAA)	80	209	1.3e-16	IPR003959	ATPase, AAA-type, core
N_psidii_MA3_01322	391	Pfam	PF08542	Replication factor C C-terminal domain	294	379	2.4e-16	IPR013748	Replication factor C, C-terminal
N_psidii_MA3_01323	598	Pfam	PF01569	PAP2 superfamily	115	236	1.9e-19	IPR000326	Phosphatidic acid phosphatase type 2/haloperoxidase
N_psidii_MA3_01325	260	Pfam	PF13561	Enoyl-(Acyl carrier protein) reductase	14	257	6.5e-45
N_psidii_MA3_01326	661	Pfam	PF00899	ThiF family	49	470	1e-73	IPR000594	THIF-type NAD/FAD binding fold
N_psidii_MA3_01326	661	Pfam	PF10585	Ubiquitin-activating enzyme active site	352	413	0.00036	IPR019572	Ubiquitin-activating enzyme, catalytic cysteine domain
N_psidii_MA3_01326	661	Pfam	PF14732	Ubiquitin/SUMO-activating enzyme ubiquitin-like domain	485	566	3.6e-23	IPR028077	Ubiquitin/SUMO-activating enzyme ubiquitin-like domain
N_psidii_MA3_01328	365	Pfam	PF10343	Potential Queuosine, Q, salvage protein family	79	365	1.3e-125	IPR019438	Queuosine salvage protein family
N_psidii_MA3_01329	206	Pfam	PF04081	DNA polymerase delta, subunit 4	66	191	6.6e-45	IPR007218	DNA polymerase delta, subunit 4
N_psidii_MA3_01330	318	Pfam	PF00400	WD domain, G-beta repeat	231	268	1.2e-09	IPR001680	WD40 repeat
N_psidii_MA3_01331	129	Pfam	PF01783	Ribosomal L32p protein family	65	115	7.3e-13	IPR002677	Ribosomal protein L32p
N_psidii_MA3_01332	338	Pfam	PF00735	Septin	31	306	6e-114	IPR030379	Septin-type guanine nucleotide-binding (G) domain
N_psidii_MA3_01334	486	Pfam	PF03198	Glucanosyltransferase	13	332	4.8e-111	IPR004886	Glucanosyltransferase
N_psidii_MA3_01335	489	Pfam	PF08442	ATP-grasp domain	73	228	3.8e-08	IPR013650	ATP-grasp fold, succinyl-CoA synthetase-type
N_psidii_MA3_01335	489	Pfam	PF16114	ATP citrate lyase citrate-binding	298	474	1.4e-86	IPR032263	ATP-citrate synthase, citrate-binding domain
N_psidii_MA3_01336	656	Pfam	PF00285	Citrate synthase, C-terminal domain	427	622	6.3e-17	IPR002020	Citrate synthase
N_psidii_MA3_01336	656	Pfam	PF02629	CoA binding domain	37	142	7e-18	IPR003781	CoA-binding
N_psidii_MA3_01336	656	Pfam	PF00549	CoA-ligase	202	325	2.3e-15	IPR005811	ATP-citrate lyase/succinyl-CoA ligase
N_psidii_MA3_01338	156	Pfam	PF00327	Ribosomal protein L30p/L7e	5	54	4.8e-15	IPR016082	Ribosomal protein L30, ferredoxin-like fold domain
N_psidii_MA3_01339	321	Pfam	PF11717	RNA binding activity-knot of a chromodomain	17	68	3.1e-07	IPR025995	RNA binding activity-knot of a chromodomain
N_psidii_MA3_01339	321	Pfam	PF05712	MRG	134	308	3.4e-60	IPR026541	MRG domain
N_psidii_MA3_01340	586	Pfam	PF01399	PCI domain	407	506	4e-20	IPR000717	Proteasome component (PCI) domain
N_psidii_MA3_01340	586	Pfam	PF08375	Proteasome regulatory subunit C-terminal	512	575	1.6e-25	IPR013586	26S proteasome regulatory subunit, C-terminal
N_psidii_MA3_01341	699	Pfam	PF03847	Transcription initiation factor TFIID subunit A	585	659	7.3e-17	IPR003228	Transcription initiation factor TFIID, subunit 12
N_psidii_MA3_01343	185	Pfam	PF09447	Cnl2/NKP2 family protein	5	68	5.9e-27	IPR018565	Kinetochore subunit NKP2
N_psidii_MA3_01344	614	Pfam	PF07993	Male sterility protein	191	440	1.1e-69	IPR013120	Male sterility, NAD-binding
N_psidii_MA3_01344	614	Pfam	PF00550	Phosphopantetheine attachment site	71	134	3.2e-10	IPR009081	Phosphopantetheine binding ACP domain
N_psidii_MA3_01345	248	Pfam	PF00501	AMP-binding enzyme	31	248	1.7e-29	IPR000873	AMP-dependent synthetase/ligase
N_psidii_MA3_01346	673	Pfam	PF13516	Leucine Rich repeat	421	440	0.12	IPR001611	Leucine-rich repeat
N_psidii_MA3_01348	150	Pfam	PF00137	ATP synthase subunit C	85	146	1.4e-10	IPR002379	V-ATPase proteolipid subunit C-like domain
N_psidii_MA3_01352	957	Pfam	PF08066	PMC2NT (NUC016) domain	155	245	8.9e-26	IPR012588	Exosome-associated factor Rrp6, N-terminal
N_psidii_MA3_01352	957	Pfam	PF00570	HRDC domain	587	645	4.5e-12	IPR002121	HRDC domain
N_psidii_MA3_01352	957	Pfam	PF01612	3'-5' exonuclease	360	526	5.7e-41	IPR002562	3'-5' exonuclease domain
N_psidii_MA3_01353	537	Pfam	PF00982	Glycosyltransferase family 20	15	477	3.1e-197	IPR001830	Glycosyl transferase, family 20
N_psidii_MA3_01354	816	Pfam	PF08553	VID27 cytoplasmic protein	1	784	0	IPR013863	Vacuolar import/degradation, Vid27-related
N_psidii_MA3_01355	553	Pfam	PF13450	NAD(P)-binding Rossmann-like domain	34	98	1.1e-12
N_psidii_MA3_01355	553	Pfam	PF07156	Prenylcysteine lyase	141	526	7.1e-93	IPR010795	Prenylcysteine lyase
N_psidii_MA3_01357	1004	Pfam	PF09421	Frequency clock protein	15	1000	0	IPR018554	Frequency clock protein
N_psidii_MA3_01361	535	Pfam	PF01676	Metalloenzyme superfamily	10	513	2.3e-63	IPR006124	Metalloenzyme
N_psidii_MA3_01361	535	Pfam	PF06415	BPG-independent PGAM N-terminus (iPGM_N)	91	306	2e-77	IPR011258	BPG-independent PGAM, N-terminal
N_psidii_MA3_01362	135	Pfam	PF07544	RNA polymerase II transcription mediator complex subunit 9	54	117	5.3e-19	IPR011425	Mediator of RNA polymerase II transcription subunit 9
N_psidii_MA3_01363	394	Pfam	PF16752	Tubulin-specific chaperone C N-terminal domain	33	118	2.9e-11	IPR031925	Tubulin-specific chaperone C, N-terminal
N_psidii_MA3_01363	394	Pfam	PF07986	Tubulin binding cofactor C	232	345	9e-30	IPR012945	Tubulin binding cofactor C-like domain
N_psidii_MA3_01366	904	Pfam	PF05254	Uncharacterised protein family (UPF0203)	3	68	1.4e-25	IPR007918	Mitochondrial distribution/morphology family 35/apoptosis
N_psidii_MA3_01366	904	Pfam	PF05024	N-acetylglucosaminyl transferase component (Gpi1)	534	720	6.3e-78	IPR007720	N-acetylglucosaminyl transferase component
N_psidii_MA3_01369	340	Pfam	PF01263	Aldose 1-epimerase	7	336	6.3e-64	IPR008183	Aldose 1-/Glucose-6-phosphate 1-epimerase
N_psidii_MA3_01370	181	Pfam	PF04145	Ctr copper transporter family	17	152	4.2e-37	IPR007274	Ctr copper transporter
N_psidii_MA3_01372	174	Pfam	PF00536	SAM domain (Sterile alpha motif)	108	163	3.9e-07	IPR001660	Sterile alpha motif domain
N_psidii_MA3_01374	172	Pfam	PF12597	Protein of unknown function (DUF3767)	48	146	9.7e-37	IPR022533	Cox20/FAM36A
N_psidii_MA3_01375	2214	Pfam	PF03104	DNA polymerase family B, exonuclease domain	97	439	2.4e-77	IPR006133	DNA-directed DNA polymerase, family B, exonuclease domain
N_psidii_MA3_01375	2214	Pfam	PF08490	Domain of unknown function (DUF1744)	1523	1907	2.1e-153	IPR013697	DNA polymerase epsilon, catalytic subunit A, C-terminal
N_psidii_MA3_01375	2214	Pfam	PF00136	DNA polymerase family B	633	1154	1.3e-14	IPR006134	DNA-directed DNA polymerase, family B, multifunctional domain
N_psidii_MA3_01377	669	Pfam	PF02845	CUE domain	329	369	3.3e-11	IPR003892	Ubiquitin system component Cue
N_psidii_MA3_01378	116	Pfam	PF00338	Ribosomal protein S10p/S20e	20	113	2.3e-27	IPR027486	Ribosomal protein S10 domain
N_psidii_MA3_01379	1053	Pfam	PF00150	Cellulase (glycosyl hydrolase family 5)	44	377	5.1e-20	IPR001547	Glycoside hydrolase, family 5
N_psidii_MA3_01381	529	Pfam	PF00067	Cytochrome P450	55	478	4.5e-61	IPR001128	Cytochrome P450
N_psidii_MA3_01384	254	Pfam	PF10277	Frag1/DRAM/Sfk1 family	19	226	3.3e-39	IPR019402	Frag1/DRAM/Sfk1
N_psidii_MA3_01385	395	Pfam	PF08640	U3 small nucleolar RNA-associated protein 6	12	86	3.2e-26	IPR013949	U3 small nucleolar RNA-associated protein 6
N_psidii_MA3_01388	1094	Pfam	PF01388	ARID/BRIGHT DNA binding domain	356	440	1.3e-17	IPR001606	ARID DNA-binding domain
N_psidii_MA3_01389	174	Pfam	PF05046	Mitochondrial large subunit ribosomal protein (Img2)	92	174	5e-22	IPR007740	Ribosomal protein L49/IMG2
N_psidii_MA3_01390	439	Pfam	PF09440	eIF3 subunit 6 N terminal domain	16	151	1.5e-44	IPR019010	Eukaryotic translation initiation factor 3 subunit E, N-terminal
N_psidii_MA3_01390	439	Pfam	PF01399	PCI domain	306	409	7.4e-12	IPR000717	Proteasome component (PCI) domain
N_psidii_MA3_01391	1948	Pfam	PF12859	Anaphase-promoting complex subunit 1	114	245	5.9e-37	IPR024990	Anaphase-promoting complex subunit 1
N_psidii_MA3_01392	1389	Pfam	PF00637	Region in Clathrin and VPS	1092	1188	1.2e-18	IPR000547	Clathrin, heavy chain/VPS, 7-fold repeat
N_psidii_MA3_01396	285	Pfam	PF03184	DDE superfamily endonuclease	7	178	5.7e-35	IPR004875	DDE superfamily endonuclease domain
N_psidii_MA3_01397	200	Pfam	PF03221	Tc5 transposase DNA-binding domain	119	178	2.2e-07	IPR006600	HTH CenpB-type DNA-binding domain
N_psidii_MA3_01397	200	Pfam	PF05225	helix-turn-helix, Psq domain	67	109	2.4e-10	IPR007889	DNA binding HTH domain, Psq-type
N_psidii_MA3_01399	615	Pfam	PF02637	GatB domain	456	608	1.6e-11	IPR018027	Asn/Gln amidotransferase
N_psidii_MA3_01399	615	Pfam	PF02934	GatB/GatE catalytic domain	99	389	8.6e-99	IPR006075	Aspartyl/Glutamyl-tRNA(Gln) amidotransferase, subunit B/E, catalytic
N_psidii_MA3_01401	405	Pfam	PF00856	SET domain	214	263	7.2e-08	IPR001214	SET domain
N_psidii_MA3_01404	276	Pfam	PF01184	GPR1/FUN34/yaaH family	58	264	3.1e-53	IPR000791	Acetate transporter GPR1/FUN34/SatP family
N_psidii_MA3_01408	324	Pfam	PF00378	Enoyl-CoA hydratase/isomerase	104	323	1.4e-36	IPR001753	Crotonase superfamily
N_psidii_MA3_01409	1266	Pfam	PF13446	A repeated domain in UCH-protein	373	424	0.0028	IPR025305	UCH repeated domain
N_psidii_MA3_01409	1266	Pfam	PF13446	A repeated domain in UCH-protein	450	496	0.00028	IPR025305	UCH repeated domain
N_psidii_MA3_01409	1266	Pfam	PF00443	Ubiquitin carboxyl-terminal hydrolase	606	1201	4.6e-42	IPR001394	Peptidase C19, ubiquitin carboxyl-terminal hydrolase
N_psidii_MA3_01410	999	Pfam	PF05378	Hydantoinase/oxoprolinase N-terminal region	9	189	3e-26	IPR008040	Hydantoinaseoxoprolinase, N-terminal
N_psidii_MA3_01410	999	Pfam	PF01968	Hydantoinase/oxoprolinase	209	380	4.2e-28	IPR002821	Hydantoinase A/oxoprolinase
N_psidii_MA3_01410	999	Pfam	PF06032	Protein of unknown function (DUF917)	597	981	2.1e-127	IPR010318	Protein of unknown function DUF917
N_psidii_MA3_01412	792	Pfam	PF00561	alpha/beta hydrolase fold	502	604	4.9e-09	IPR000073	Alpha/beta hydrolase fold-1
N_psidii_MA3_01417	668	Pfam	PF12796	Ankyrin repeats (3 copies)	196	289	1.6e-09	IPR020683	Ankyrin repeat-containing domain
N_psidii_MA3_01420	166	Pfam	PF07510	Protein of unknown function (DUF1524)	64	160	1.4e-08	IPR011089	Domain of unknown function DUF1524
N_psidii_MA3_01421	463	Pfam	PF00722	Glycosyl hydrolases family 16	98	264	1.9e-27	IPR000757	Glycoside hydrolase family 16
N_psidii_MA3_01422	1565	Pfam	PF15410	Pleckstrin homology domain	1216	1346	3.4e-18
N_psidii_MA3_01422	1565	Pfam	PF01369	Sec7 domain	795	938	4.6e-30	IPR000904	Sec7 domain
N_psidii_MA3_01428	637	Pfam	PF00743	Flavin-binding monooxygenase-like	2	210	9.6e-24	IPR020946	Flavin monooxygenase-like
N_psidii_MA3_01428	637	Pfam	PF00743	Flavin-binding monooxygenase-like	382	549	2.4e-06	IPR020946	Flavin monooxygenase-like
N_psidii_MA3_01431	308	Pfam	PF00248	Aldo/keto reductase family	54	295	1.2e-48	IPR023210	NADP-dependent oxidoreductase domain
N_psidii_MA3_01435	327	Pfam	PF00498	FHA domain	233	313	8.4e-15	IPR000253	Forkhead-associated (FHA) domain
N_psidii_MA3_01437	259	Pfam	PF00702	haloacid dehalogenase-like hydrolase	23	215	3.7e-06
N_psidii_MA3_01446	714	Pfam	PF01237	Oxysterol-binding protein	284	689	8.1e-49	IPR000648	Oxysterol-binding protein
N_psidii_MA3_01447	511	Pfam	PF00282	Pyridoxal-dependent decarboxylase conserved domain	81	441	5e-77	IPR002129	Pyridoxal phosphate-dependent decarboxylase
N_psidii_MA3_01449	273	Pfam	PF00071	Ras family	20	118	3.6e-25	IPR001806	Small GTPase superfamily
N_psidii_MA3_01449	273	Pfam	PF00071	Ras family	153	207	3.4e-12	IPR001806	Small GTPase superfamily
N_psidii_MA3_01450	262	Pfam	PF01871	AMMECR1	9	243	4.3e-46	IPR002733	AMMECR1 domain
N_psidii_MA3_01455	985	Pfam	PF02296	Alpha adaptin AP2, C-terminal domain	839	951	2.8e-48	IPR003164	Clathrin adaptor, alpha-adaptin, appendage, C-terminal subdomain
N_psidii_MA3_01455	985	Pfam	PF02883	Adaptin C-terminal domain	727	826	5.5e-14	IPR008152	Clathrin adaptor, alpha/beta/gamma-adaptin, appendage, Ig-like subdomain
N_psidii_MA3_01455	985	Pfam	PF01602	Adaptin N terminal region	38	590	4.3e-121	IPR002553	Clathrin/coatomer adaptor, adaptin-like, N-terminal
N_psidii_MA3_01456	358	Pfam	PF08241	Methyltransferase domain	124	204	1.6e-10	IPR013216	Methyltransferase type 11
N_psidii_MA3_01457	202	Pfam	PF04699	ARP2/3 complex 16 kDa subunit (p16-Arc)	15	202	9.7e-52	IPR006789	Actin-related protein 2/3 complex subunit 5
N_psidii_MA3_01465	296	Pfam	PF00795	Carbon-nitrogen hydrolase	4	278	1.2e-44	IPR003010	Carbon-nitrogen hydrolase
N_psidii_MA3_01466	635	Pfam	PF05236	Transcription initiation factor TFIID component TAF4 family	336	618	3.1e-24	IPR007900	Transcription initiation factor TFIID component TAF4
N_psidii_MA3_01467	842	Pfam	PF10996	Beta-Casp domain	263	398	1.7e-29	IPR022712	Beta-Casp domain
N_psidii_MA3_01467	842	Pfam	PF16661	Metallo-beta-lactamase superfamily domain	42	220	3.1e-18	IPR001279	Metallo-beta-lactamase
N_psidii_MA3_01467	842	Pfam	PF07521	Zn-dependent metallo-hydrolase RNA specificity domain	429	479	3e-11	IPR011108	Zn-dependent metallo-hydrolase, RNA specificity domain
N_psidii_MA3_01467	842	Pfam	PF11718	Pre-mRNA 3'-end-processing endonuclease polyadenylation factor C-term	534	839	3.7e-85	IPR021718	Pre-mRNA 3'-end-processing endonuclease polyadenylation factor C-term
N_psidii_MA3_01468	857	Pfam	PF01496	V-type ATPase 116kDa subunit family	32	842	0	IPR002490	V-type ATPase, V0 complex, 116kDa subunit family
N_psidii_MA3_01472	687	Pfam	PF12998	Inhibitor of growth proteins N-terminal histone-binding	61	88	0.0004	IPR024610	Inhibitor of growth protein, N-terminal histone-binding
N_psidii_MA3_01473	367	Pfam	PF01255	Putative undecaprenyl diphosphate synthase	46	351	6.5e-82	IPR001441	Decaprenyl diphosphate synthase-like
N_psidii_MA3_01474	1353	Pfam	PF03200	Glycosyl hydrolase family 63 C-terminal domain	1057	1234	2e-08	IPR031335	Glycosyl hydrolase family 63, C-terminal
N_psidii_MA3_01475	298	Pfam	PF00213	ATP synthase delta (OSCP) subunit	118	293	3.8e-47	IPR000711	ATPase, OSCP/delta subunit
N_psidii_MA3_01476	236	Pfam	PF03637	Mob1/phocein family	55	220	7.4e-70	IPR005301	MOB kinase activator family
N_psidii_MA3_01477	590	Pfam	PF00149	Calcineurin-like phosphoesterase	86	286	0.0005	IPR004843	Calcineurin-like phosphoesterase domain, ApaH type
N_psidii_MA3_01477	590	Pfam	PF05011	Lariat debranching enzyme, C-terminal domain	389	534	5.5e-50	IPR007708	Lariat debranching enzyme, C-terminal
N_psidii_MA3_01478	108	Pfam	PF03931	Skp1 family, tetramerisation domain	7	68	2.8e-08	IPR016073	SKP1 component, POZ domain
N_psidii_MA3_01479	273	Pfam	PF00071	Ras family	59	231	2.5e-47	IPR001806	Small GTPase superfamily
N_psidii_MA3_01481	2305	Pfam	PF00249	Myb-like DNA-binding domain	1538	1578	1.5e-06	IPR001005	SANT/Myb domain
N_psidii_MA3_01482	360	Pfam	PF01916	Deoxyhypusine synthase	48	348	1.7e-130	IPR002773	Deoxyhypusine synthase
N_psidii_MA3_01483	311	Pfam	PF00248	Aldo/keto reductase family	32	215	4.9e-15	IPR023210	NADP-dependent oxidoreductase domain
N_psidii_MA3_01484	393	Pfam	PF01408	Oxidoreductase family, NAD-binding Rossmann fold	10	135	3.1e-17	IPR000683	Oxidoreductase, N-terminal
N_psidii_MA3_01486	252	Pfam	PF08241	Methyltransferase domain	81	166	1e-10	IPR013216	Methyltransferase type 11
N_psidii_MA3_01487	299	Pfam	PF00249	Myb-like DNA-binding domain	24	66	2.9e-10	IPR001005	SANT/Myb domain
N_psidii_MA3_01491	241	Pfam	PF01302	CAP-Gly domain	153	224	5.5e-21	IPR000938	CAP Gly-rich domain
N_psidii_MA3_01491	241	Pfam	PF14560	Ubiquitin-like domain	4	85	9.6e-21	IPR000626	Ubiquitin domain
N_psidii_MA3_01493	561	Pfam	PF13639	Ring finger domain	407	449	4.1e-13	IPR001841	Zinc finger, RING-type
N_psidii_MA3_01496	413	Pfam	PF11790	Glycosyl hydrolase catalytic core	181	410	5.9e-59	IPR024655	Uncharacterised protein family, glycosyl hydrolase catalytic domain
N_psidii_MA3_01497	454	Pfam	PF11951	Fungal specific transcription factor domain	145	241	2.3e-06	IPR021858	Fungal transcription factor
N_psidii_MA3_01497	454	Pfam	PF00172	Fungal Zn(2)-Cys(6) binuclear cluster domain	91	123	4.9e-08	IPR001138	Zn(2)-C6 fungal-type DNA-binding domain
N_psidii_MA3_01517	536	Pfam	PF00067	Cytochrome P450	55	500	2.7e-60	IPR001128	Cytochrome P450
N_psidii_MA3_01518	806	Pfam	PF00179	Ubiquitin-conjugating enzyme	548	672	2e-15	IPR000608	Ubiquitin-conjugating enzyme E2
N_psidii_MA3_01520	414	Pfam	PF03114	BAR domain	6	232	6.2e-53	IPR004148	BAR domain
N_psidii_MA3_01521	353	Pfam	PF16899	Cyclin C-terminal domain	158	264	4e-30	IPR031658	Cyclin, C-terminal domain 2
N_psidii_MA3_01523	379	Pfam	PF02469	Fasciclin domain	38	176	6.3e-19	IPR000782	FAS1 domain
N_psidii_MA3_01523	379	Pfam	PF02469	Fasciclin domain	188	305	1.4e-27	IPR000782	FAS1 domain
N_psidii_MA3_01524	424	Pfam	PF00295	Glycosyl hydrolases family 28	110	340	7.3e-36	IPR000743	Glycoside hydrolase, family 28
N_psidii_MA3_01525	489	Pfam	PF07690	Major Facilitator Superfamily	47	411	7e-34	IPR011701	Major facilitator superfamily
N_psidii_MA3_01526	541	Pfam	PF01546	Peptidase family M20/M25/M40	226	497	5.6e-10	IPR002933	Peptidase M20
N_psidii_MA3_01526	541	Pfam	PF07687	Peptidase dimerisation domain	319	412	6.4e-07	IPR011650	Peptidase M20, dimerisation domain
N_psidii_MA3_01528	528	Pfam	PF07690	Major Facilitator Superfamily	60	415	2.2e-31	IPR011701	Major facilitator superfamily
N_psidii_MA3_01529	313	Pfam	PF00106	short chain dehydrogenase	41	230	1.8e-36	IPR002347	Short-chain dehydrogenase/reductase SDR
N_psidii_MA3_01531	458	Pfam	PF05730	CFEM domain	28	91	1.9e-15	IPR008427	Extracellular membrane protein, CFEM domain
N_psidii_MA3_01532	747	Pfam	PF00172	Fungal Zn(2)-Cys(6) binuclear cluster domain	26	57	7e-05	IPR001138	Zn(2)-C6 fungal-type DNA-binding domain
N_psidii_MA3_01533	266	Pfam	PF00153	Mitochondrial carrier protein	169	252	2e-15	IPR018108	Mitochondrial substrate/solute carrier
N_psidii_MA3_01533	266	Pfam	PF00153	Mitochondrial carrier protein	67	161	5.3e-11	IPR018108	Mitochondrial substrate/solute carrier
N_psidii_MA3_01535	537	Pfam	PF01144	Coenzyme A transferase	322	519	6.4e-39	IPR004165	Coenzyme A transferase family I
N_psidii_MA3_01535	537	Pfam	PF01144	Coenzyme A transferase	56	287	9.1e-59	IPR004165	Coenzyme A transferase family I
N_psidii_MA3_01536	480	Pfam	PF07690	Major Facilitator Superfamily	40	413	1.9e-36	IPR011701	Major facilitator superfamily
N_psidii_MA3_01537	399	Pfam	PF13520	Amino acid permease	43	398	1.8e-77	IPR002293	Amino acid/polyamine transporter I
N_psidii_MA3_01539	275	Pfam	PF00385	Chromo (CHRromatin Organisation MOdifier) domain	189	239	5.5e-08	IPR023780	Chromo domain
N_psidii_MA3_01542	444	Pfam	PF07690	Major Facilitator Superfamily	5	327	5.7e-16	IPR011701	Major facilitator superfamily
N_psidii_MA3_01544	442	Pfam	PF01494	FAD binding domain	3	361	5.2e-18	IPR002938	FAD-binding domain
N_psidii_MA3_01545	344	Pfam	PF03239	Iron permease FTR1 family	8	315	8.5e-78	IPR004923	Iron permease FTR1/Fip1/EfeU
N_psidii_MA3_01547	628	Pfam	PF07732	Multicopper oxidase	33	148	1.7e-41	IPR011707	Multicopper oxidase, type 3
N_psidii_MA3_01547	628	Pfam	PF00394	Multicopper oxidase	158	304	1.8e-35	IPR001117	Multicopper oxidase, type 1
N_psidii_MA3_01547	628	Pfam	PF07731	Multicopper oxidase	365	496	7.2e-40	IPR011706	Multicopper oxidase, type 2
N_psidii_MA3_01548	251	Pfam	PF10601	LITAF-like zinc ribbon domain	152	217	7.2e-18	IPR006629	LPS-induced tumour necrosis factor alpha factor
N_psidii_MA3_01552	1260	Pfam	PF13472	GDSL-like Lipase/Acylhydrolase family	4	150	1.1e-12	IPR013830	SGNH hydrolase-type esterase domain
N_psidii_MA3_01552	1260	Pfam	PF13517	Repeat domain in Vibrio, Colwellia, Bradyrhizobium and Shewanella	660	721	3.3e-09
N_psidii_MA3_01552	1260	Pfam	PF13517	Repeat domain in Vibrio, Colwellia, Bradyrhizobium and Shewanella	288	358	5.8e-09
N_psidii_MA3_01555	515	Pfam	PF00083	Sugar (and other) transporter	19	477	8.4e-99	IPR005828	Major facilitator, sugar transporter-like
N_psidii_MA3_01556	279	Pfam	PF03659	Glycosyl hydrolase family 71	15	254	2.8e-53	IPR005197	Glycoside hydrolase family 71
N_psidii_MA3_01558	457	Pfam	PF07690	Major Facilitator Superfamily	56	322	2e-12	IPR011701	Major facilitator superfamily
N_psidii_MA3_01562	359	Pfam	PF01053	Cys/Met metabolism PLP-dependent enzyme	34	352	2.1e-35	IPR000277	Cys/Met metabolism, pyridoxal phosphate-dependent enzyme
N_psidii_MA3_01563	684	Pfam	PF05729	NACHT domain	222	363	2.4e-09
N_psidii_MA3_01568	831	Pfam	PF05686	Glycosyl transferase family 90	711	823	1e-08	IPR006598	Lipopolysaccharide-modifying protein
N_psidii_MA3_01572	535	Pfam	PF07690	Major Facilitator Superfamily	58	419	2.1e-34	IPR011701	Major facilitator superfamily
N_psidii_MA3_01573	473	Pfam	PF00173	Cytochrome b5-like Heme/Steroid binding domain	6	77	3.8e-18	IPR001199	Cytochrome b5-like heme/steroid binding domain
N_psidii_MA3_01573	473	Pfam	PF01070	FMN-dependent dehydrogenase	119	459	1.2e-105	IPR000262	FMN-dependent dehydrogenase
N_psidii_MA3_01574	383	Pfam	PF02746	Mandelate racemase / muconate lactonizing enzyme, N-terminal domain	15	108	1.3e-19	IPR013341	Mandelate racemase/muconate lactonizing enzyme, N-terminal domain
N_psidii_MA3_01574	383	Pfam	PF13378	Enolase C-terminal domain-like	130	356	2.8e-55	IPR029065	Enolase C-terminal domain-like
N_psidii_MA3_01576	263	Pfam	PF13561	Enoyl-(Acyl carrier protein) reductase	23	260	1.5e-53
N_psidii_MA3_01577	321	Pfam	PF08546	Ketopantoate reductase PanE/ApbA C terminal	191	313	6.1e-31	IPR013752	Ketopantoate reductase, C-terminal domain
N_psidii_MA3_01577	321	Pfam	PF02558	Ketopantoate reductase PanE/ApbA	9	160	7.2e-29	IPR013332	Ketopantoate reductase, N-terminal domain
N_psidii_MA3_01578	531	Pfam	PF07690	Major Facilitator Superfamily	67	431	4.2e-34	IPR011701	Major facilitator superfamily
N_psidii_MA3_01582	489	Pfam	PF13640	2OG-Fe(II) oxygenase superfamily	361	471	1.3e-09	IPR005123	Oxoglutarate/iron-dependent dioxygenase
N_psidii_MA3_01584	628	Pfam	PF04082	Fungal specific transcription factor domain	244	479	4.1e-23	IPR007219	Transcription factor domain, fungi
N_psidii_MA3_01585	539	Pfam	PF02133	Permease for cytosine/purines, uracil, thiamine, allantoin	102	464	2.3e-72	IPR001248	Purine-cytosine permease
N_psidii_MA3_01585	539	Pfam	PF02133	Permease for cytosine/purines, uracil, thiamine, allantoin	15	91	5.2e-16	IPR001248	Purine-cytosine permease
N_psidii_MA3_01586	1002	Pfam	PF01968	Hydantoinase/oxoprolinase	205	396	9.5e-20	IPR002821	Hydantoinase A/oxoprolinase
N_psidii_MA3_01586	1002	Pfam	PF05378	Hydantoinase/oxoprolinase N-terminal region	5	185	3.6e-26	IPR008040	Hydantoinaseoxoprolinase, N-terminal
N_psidii_MA3_01586	1002	Pfam	PF06032	Protein of unknown function (DUF917)	611	975	1.5e-116	IPR010318	Protein of unknown function DUF917
N_psidii_MA3_01587	775	Pfam	PF04082	Fungal specific transcription factor domain	293	467	8.3e-18	IPR007219	Transcription factor domain, fungi
N_psidii_MA3_01587	775	Pfam	PF00172	Fungal Zn(2)-Cys(6) binuclear cluster domain	43	79	4.8e-06	IPR001138	Zn(2)-C6 fungal-type DNA-binding domain
N_psidii_MA3_01588	456	Pfam	PF00083	Sugar (and other) transporter	22	431	1.3e-90	IPR005828	Major facilitator, sugar transporter-like
N_psidii_MA3_01590	277	Pfam	PF13561	Enoyl-(Acyl carrier protein) reductase	42	275	8.5e-58
N_psidii_MA3_01591	221	Pfam	PF00107	Zinc-binding dehydrogenase	37	178	1.7e-23	IPR013149	Alcohol dehydrogenase, C-terminal
N_psidii_MA3_01592	269	Pfam	PF13561	Enoyl-(Acyl carrier protein) reductase	28	267	2.8e-62
N_psidii_MA3_01593	799	Pfam	PF03169	OPT oligopeptide transporter protein	104	755	2.8e-168	IPR004813	Oligopeptide transporter, OPT superfamily
N_psidii_MA3_01596	527	Pfam	PF00135	Carboxylesterase family	266	500	2.8e-16	IPR002018	Carboxylesterase, type B
N_psidii_MA3_01596	527	Pfam	PF00135	Carboxylesterase family	28	244	2.7e-65	IPR002018	Carboxylesterase, type B
N_psidii_MA3_01597	140	Pfam	PF01915	Glycosyl hydrolase family 3 C-terminal domain	2	79	2.6e-11	IPR002772	Glycoside hydrolase family 3 C-terminal domain
N_psidii_MA3_01598	559	Pfam	PF07690	Major Facilitator Superfamily	117	506	1.2e-37	IPR011701	Major facilitator superfamily
N_psidii_MA3_01603	282	Pfam	PF01738	Dienelactone hydrolase family	211	281	1.4e-07	IPR002925	Dienelactone hydrolase
N_psidii_MA3_01604	532	Pfam	PF00067	Cytochrome P450	32	496	8.9e-70	IPR001128	Cytochrome P450
N_psidii_MA3_01608	641	Pfam	PF05199	GMC oxidoreductase	493	630	3.4e-33	IPR007867	Glucose-methanol-choline oxidoreductase, C-terminal
N_psidii_MA3_01608	641	Pfam	PF00732	GMC oxidoreductase	284	387	2.9e-19	IPR000172	Glucose-methanol-choline oxidoreductase, N-terminal
N_psidii_MA3_01616	470	Pfam	PF10528	GLEYA domain	129	216	2.6e-16	IPR018871	GLEYA adhesin domain
N_psidii_MA3_01617	1024	Pfam	PF00550	Phosphopantetheine attachment site	535	596	5.5e-11	IPR009081	Phosphopantetheine binding ACP domain
N_psidii_MA3_01617	1024	Pfam	PF13193	AMP-binding enzyme C-terminal domain	422	499	6.5e-11	IPR025110	AMP-binding enzyme, C-terminal domain
N_psidii_MA3_01617	1024	Pfam	PF00501	AMP-binding enzyme	7	412	6.9e-74	IPR000873	AMP-dependent synthetase/ligase
N_psidii_MA3_01617	1024	Pfam	PF07993	Male sterility protein	638	881	6.6e-57	IPR013120	Male sterility, NAD-binding
N_psidii_MA3_01618	617	Pfam	PF00067	Cytochrome P450	163	567	1.4e-63	IPR001128	Cytochrome P450
N_psidii_MA3_01623	486	Pfam	PF00172	Fungal Zn(2)-Cys(6) binuclear cluster domain	13	44	1.5e-09	IPR001138	Zn(2)-C6 fungal-type DNA-binding domain
N_psidii_MA3_01624	561	Pfam	PF00083	Sugar (and other) transporter	66	522	1.2e-85	IPR005828	Major facilitator, sugar transporter-like
N_psidii_MA3_01626	600	Pfam	PF00128	Alpha amylase, catalytic domain	31	395	8.4e-113	IPR006047	Glycosyl hydrolase, family 13, catalytic domain
N_psidii_MA3_01631	654	Pfam	PF00920	Dehydratase family	103	631	8.7e-155	IPR000581	Dihydroxy-acid/6-phosphogluconate dehydratase
N_psidii_MA3_01633	495	Pfam	PF00172	Fungal Zn(2)-Cys(6) binuclear cluster domain	11	40	4.1e-09	IPR001138	Zn(2)-C6 fungal-type DNA-binding domain
N_psidii_MA3_01633	495	Pfam	PF04082	Fungal specific transcription factor domain	278	466	4.5e-22	IPR007219	Transcription factor domain, fungi
N_psidii_MA3_01635	546	Pfam	PF00069	Protein kinase domain	248	502	6.4e-11	IPR000719	Protein kinase domain
N_psidii_MA3_01638	214	Pfam	PF10417	C-terminal domain of 1-Cys peroxiredoxin	161	194	9.6e-12	IPR019479	Peroxiredoxin, C-terminal
N_psidii_MA3_01638	214	Pfam	PF00578	AhpC/TSA family	6	140	1.8e-38	IPR000866	Alkyl hydroperoxide reductase subunit C/ Thiol specific antioxidant
N_psidii_MA3_01639	553	Pfam	PF01425	Amidase	89	541	5.7e-88	IPR023631	Amidase signature domain
N_psidii_MA3_01643	1903	Pfam	PF00975	Thioesterase domain	1618	1871	3.8e-20	IPR001031	Thioesterase
N_psidii_MA3_01643	1903	Pfam	PF02801	Beta-ketoacyl synthase, C-terminal domain	344	459	1.6e-29	IPR014031	Beta-ketoacyl synthase, C-terminal
N_psidii_MA3_01643	1903	Pfam	PF00550	Phosphopantetheine attachment site	1378	1442	7e-11	IPR009081	Phosphopantetheine binding ACP domain
N_psidii_MA3_01643	1903	Pfam	PF00550	Phosphopantetheine attachment site	1492	1555	5.2e-11	IPR009081	Phosphopantetheine binding ACP domain
N_psidii_MA3_01643	1903	Pfam	PF14765	Polyketide synthase dehydratase	1043	1325	6.9e-19	IPR020807	Polyketide synthase, dehydratase domain
N_psidii_MA3_01643	1903	Pfam	PF00109	Beta-ketoacyl synthase, N-terminal domain	78	335	3.7e-74	IPR014030	Beta-ketoacyl synthase, N-terminal
N_psidii_MA3_01643	1903	Pfam	PF00698	Acyl transferase domain	623	916	5.2e-44	IPR014043	Acyl transferase
N_psidii_MA3_01645	856	Pfam	PF00067	Cytochrome P450	405	836	2.1e-61	IPR001128	Cytochrome P450
N_psidii_MA3_01646	538	Pfam	PF00067	Cytochrome P450	67	480	2.7e-52	IPR001128	Cytochrome P450
N_psidii_MA3_01648	846	Pfam	PF00067	Cytochrome P450	6	337	9.5e-57	IPR001128	Cytochrome P450
N_psidii_MA3_01652	500	Pfam	PF00067	Cytochrome P450	66	454	7.3e-59	IPR001128	Cytochrome P450
N_psidii_MA3_01653	317	Pfam	PF00106	short chain dehydrogenase	15	210	1.1e-35	IPR002347	Short-chain dehydrogenase/reductase SDR
N_psidii_MA3_01656	246	Pfam	PF00132	Bacterial transferase hexapeptide (six repeats)	135	169	1.4e-10	IPR001451	Hexapeptide repeat
N_psidii_MA3_01656	246	Pfam	PF12464	Maltose acetyltransferase	13	50	2.4e-07	IPR024688	Maltose/galactoside acetyltransferase
N_psidii_MA3_01657	482	Pfam	PF07690	Major Facilitator Superfamily	114	347	6e-14	IPR011701	Major facilitator superfamily
N_psidii_MA3_01659	403	Pfam	PF11951	Fungal specific transcription factor domain	11	345	3.5e-33	IPR021858	Fungal transcription factor
N_psidii_MA3_01661	725	Pfam	PF07492	Neutral trehalase Ca2+ binding domain	80	109	7e-16	IPR011120	Neutral trehalase Ca2+ binding
N_psidii_MA3_01661	725	Pfam	PF01204	Trehalase	135	699	5.6e-176	IPR001661	Glycoside hydrolase, family 37
N_psidii_MA3_01664	682	Pfam	PF07690	Major Facilitator Superfamily	179	616	3.2e-25	IPR011701	Major facilitator superfamily
N_psidii_MA3_01665	499	Pfam	PF01266	FAD dependent oxidoreductase	57	414	1.8e-22	IPR006076	FAD dependent oxidoreductase
N_psidii_MA3_01668	397	Pfam	PF00172	Fungal Zn(2)-Cys(6) binuclear cluster domain	12	49	5.8e-06	IPR001138	Zn(2)-C6 fungal-type DNA-binding domain
N_psidii_MA3_01668	397	Pfam	PF04082	Fungal specific transcription factor domain	232	317	3.3e-06	IPR007219	Transcription factor domain, fungi
N_psidii_MA3_01669	559	Pfam	PF12796	Ankyrin repeats (3 copies)	403	489	1.6e-11	IPR020683	Ankyrin repeat-containing domain
N_psidii_MA3_01669	559	Pfam	PF12796	Ankyrin repeats (3 copies)	331	395	1e-11	IPR020683	Ankyrin repeat-containing domain
N_psidii_MA3_01669	559	Pfam	PF12796	Ankyrin repeats (3 copies)	25	118	8.1e-14	IPR020683	Ankyrin repeat-containing domain
N_psidii_MA3_01669	559	Pfam	PF12796	Ankyrin repeats (3 copies)	238	329	2.1e-13	IPR020683	Ankyrin repeat-containing domain
N_psidii_MA3_01669	559	Pfam	PF12796	Ankyrin repeats (3 copies)	125	216	3.5e-17	IPR020683	Ankyrin repeat-containing domain
N_psidii_MA3_01671	216	Pfam	PF03641	Possible lysine decarboxylase	55	192	5.5e-38	IPR031100	LOG family
N_psidii_MA3_01672	386	Pfam	PF01715	IPP transferase	121	218	8.4e-08	IPR018022	IPP transferase
N_psidii_MA3_01672	386	Pfam	PF01715	IPP transferase	40	109	1.2e-14	IPR018022	IPP transferase
N_psidii_MA3_01675	320	Pfam	PF02826	D-isomer specific 2-hydroxyacid dehydrogenase, NAD binding domain	128	228	2.9e-28	IPR006140	D-isomer specific 2-hydroxyacid dehydrogenase, NAD-binding domain
N_psidii_MA3_01676	537	Pfam	PF00962	Adenosine/AMP deaminase	305	507	1.2e-18	IPR001365	Adenosine/AMP deaminase domain
N_psidii_MA3_01678	525	Pfam	PF13520	Amino acid permease	35	479	1.7e-55	IPR002293	Amino acid/polyamine transporter I
N_psidii_MA3_01680	308	Pfam	PF05721	Phytanoyl-CoA dioxygenase (PhyH)	29	236	3.3e-22	IPR008775	Phytanoyl-CoA dioxygenase
N_psidii_MA3_01682	251	Pfam	PF13561	Enoyl-(Acyl carrier protein) reductase	14	248	1.3e-56
N_psidii_MA3_01683	518	Pfam	PF11951	Fungal specific transcription factor domain	127	463	8.7e-34	IPR021858	Fungal transcription factor
N_psidii_MA3_01683	518	Pfam	PF00172	Fungal Zn(2)-Cys(6) binuclear cluster domain	54	88	1e-06	IPR001138	Zn(2)-C6 fungal-type DNA-binding domain
N_psidii_MA3_01684	137	Pfam	PF01042	Endoribonuclease L-PSP	21	135	2.9e-16	IPR006175	YjgF/YER057c/UK114 family
N_psidii_MA3_01685	507	Pfam	PF01593	Flavin containing amine oxidoreductase	52	489	6.6e-48	IPR002937	Amine oxidase
N_psidii_MA3_01687	553	Pfam	PF13520	Amino acid permease	46	488	1.1e-57	IPR002293	Amino acid/polyamine transporter I
N_psidii_MA3_01688	547	Pfam	PF01425	Amidase	84	535	5.7e-96	IPR023631	Amidase signature domain
N_psidii_MA3_01690	645	Pfam	PF00172	Fungal Zn(2)-Cys(6) binuclear cluster domain	20	54	1.4e-08	IPR001138	Zn(2)-C6 fungal-type DNA-binding domain
N_psidii_MA3_01690	645	Pfam	PF11951	Fungal specific transcription factor domain	269	645	1.7e-39	IPR021858	Fungal transcription factor
N_psidii_MA3_01691	670	Pfam	PF01179	Copper amine oxidase, enzyme domain	239	641	3.8e-164	IPR015798	Copper amine oxidase, catalytic domain
N_psidii_MA3_01693	498	Pfam	PF02434	Fringe-like	205	262	7.6e-05	IPR003378	Fringe-like
N_psidii_MA3_01694	411	Pfam	PF13632	Glycosyl transferase family group 2	82	274	1.3e-11	IPR001173	Glycosyltransferase 2-like
N_psidii_MA3_01701	483	Pfam	PF00069	Protein kinase domain	101	247	6.9e-15	IPR000719	Protein kinase domain
N_psidii_MA3_01701	483	Pfam	PF00069	Protein kinase domain	306	480	1.3e-15	IPR000719	Protein kinase domain
N_psidii_MA3_01702	487	Pfam	PF02434	Fringe-like	212	272	4.2e-05	IPR003378	Fringe-like
N_psidii_MA3_01703	635	Pfam	PF04082	Fungal specific transcription factor domain	116	213	2.2e-06	IPR007219	Transcription factor domain, fungi
N_psidii_MA3_01704	627	Pfam	PF07690	Major Facilitator Superfamily	66	404	7.1e-26	IPR011701	Major facilitator superfamily
N_psidii_MA3_01706	271	Pfam	PF00172	Fungal Zn(2)-Cys(6) binuclear cluster domain	24	54	2.9e-05	IPR001138	Zn(2)-C6 fungal-type DNA-binding domain
N_psidii_MA3_01707	444	Pfam	PF00106	short chain dehydrogenase	31	225	8.4e-18	IPR002347	Short-chain dehydrogenase/reductase SDR
N_psidii_MA3_01708	510	Pfam	PF00067	Cytochrome P450	92	482	2.1e-36	IPR001128	Cytochrome P450
N_psidii_MA3_01709	275	Pfam	PF00067	Cytochrome P450	48	149	1.7e-08	IPR001128	Cytochrome P450
N_psidii_MA3_01710	257	Pfam	PF03151	Triose-phosphate Transporter family	2	189	7.2e-11	IPR004853	Sugar phosphate transporter domain
N_psidii_MA3_01711	358	Pfam	PF09258	Glycosyl transferase family 64 domain	110	348	2e-56	IPR015338	Exostosin , C-terminal
N_psidii_MA3_01712	297	Pfam	PF07519	Tannase and feruloyl esterase	8	296	9e-49	IPR011118	Tannase/feruloyl esterase
N_psidii_MA3_01715	529	Pfam	PF00172	Fungal Zn(2)-Cys(6) binuclear cluster domain	141	172	7.6e-08	IPR001138	Zn(2)-C6 fungal-type DNA-binding domain
N_psidii_MA3_01716	398	Pfam	PF08031	Berberine and berberine like	355	396	4.3e-06	IPR012951	Berberine/berberine-like
N_psidii_MA3_01716	398	Pfam	PF01565	FAD binding domain	2	109	1.2e-15	IPR006094	FAD linked oxidase, N-terminal
N_psidii_MA3_01717	334	Pfam	PF04909	Amidohydrolase	4	311	2.2e-44	IPR006680	Amidohydrolase-related
N_psidii_MA3_01718	533	Pfam	PF00067	Cytochrome P450	85	527	1.1e-60	IPR001128	Cytochrome P450
N_psidii_MA3_01719	3123	Pfam	PF11991	Tryptophan dimethylallyltransferase	2721	3076	1.2e-100	IPR017795	Aromatic prenyltransferase, DMATS-type
N_psidii_MA3_01719	3123	Pfam	PF07859	alpha/beta hydrolase fold	2281	2412	2.1e-12	IPR013094	Alpha/beta hydrolase fold-3
N_psidii_MA3_01719	3123	Pfam	PF00550	Phosphopantetheine attachment site	1745	1808	1.2e-08	IPR009081	Phosphopantetheine binding ACP domain
N_psidii_MA3_01719	3123	Pfam	PF00550	Phosphopantetheine attachment site	1639	1698	1.3e-10	IPR009081	Phosphopantetheine binding ACP domain
N_psidii_MA3_01719	3123	Pfam	PF02801	Beta-ketoacyl synthase, C-terminal domain	636	750	6.1e-33	IPR014031	Beta-ketoacyl synthase, C-terminal
N_psidii_MA3_01719	3123	Pfam	PF16073	Starter unit:ACP transacylase in aflatoxin biosynthesis	91	233	1.3e-08	IPR032088	Starter unit:ACP transacylase
N_psidii_MA3_01719	3123	Pfam	PF00326	Prolyl oligopeptidase family	2478	2572	1.5e-08	IPR001375	Peptidase S9, prolyl oligopeptidase, catalytic domain
N_psidii_MA3_01719	3123	Pfam	PF00109	Beta-ketoacyl synthase, N-terminal domain	381	628	1.9e-73	IPR014030	Beta-ketoacyl synthase, N-terminal
N_psidii_MA3_01719	3123	Pfam	PF08242	Methyltransferase domain	2062	2163	1.5e-12	IPR013217	Methyltransferase type 12
N_psidii_MA3_01719	3123	Pfam	PF14765	Polyketide synthase dehydratase	1311	1581	2.7e-24	IPR020807	Polyketide synthase, dehydratase domain
N_psidii_MA3_01719	3123	Pfam	PF00698	Acyl transferase domain	905	1163	5.7e-26	IPR014043	Acyl transferase
N_psidii_MA3_01720	393	Pfam	PF00724	NADH:flavin oxidoreductase / NADH oxidase family	7	351	3.9e-90	IPR001155	NADH:flavin oxidoreductase/NADH oxidase, N-terminal
N_psidii_MA3_01721	352	Pfam	PF02666	Phosphatidylserine decarboxylase	135	347	1.8e-43	IPR003817	Phosphatidylserine decarboxylase-related
N_psidii_MA3_01722	434	Pfam	PF04488	Glycosyltransferase sugar-binding region containing DXD motif	128	215	1.2e-11	IPR007577	Glycosyltransferase, DXD sugar-binding motif
N_psidii_MA3_01724	503	Pfam	PF01757	Acyltransferase family	70	422	8e-34	IPR002656	Acyltransferase 3
N_psidii_MA3_01727	498	Pfam	PF01699	Sodium/calcium exchanger protein	317	457	1.4e-14	IPR004837	Sodium/calcium exchanger membrane region
N_psidii_MA3_01727	498	Pfam	PF01699	Sodium/calcium exchanger protein	96	280	5.2e-13	IPR004837	Sodium/calcium exchanger membrane region
N_psidii_MA3_01728	450	Pfam	PF13520	Amino acid permease	84	265	1.7e-20	IPR002293	Amino acid/polyamine transporter I
N_psidii_MA3_01728	450	Pfam	PF13520	Amino acid permease	336	422	4.2e-11	IPR002293	Amino acid/polyamine transporter I
N_psidii_MA3_01729	369	Pfam	PF04488	Glycosyltransferase sugar-binding region containing DXD motif	108	185	1.1e-11	IPR007577	Glycosyltransferase, DXD sugar-binding motif
N_psidii_MA3_01731	221	Pfam	PF00457	Glycosyl hydrolases family 11	37	215	4.8e-72	IPR033123	Glycosyl hydrolases family 11 (GH11) domain
N_psidii_MA3_01733	355	Pfam	PF00107	Zinc-binding dehydrogenase	183	310	3.1e-24	IPR013149	Alcohol dehydrogenase, C-terminal
N_psidii_MA3_01733	355	Pfam	PF08240	Alcohol dehydrogenase GroES-like domain	25	142	4.6e-26	IPR013154	Alcohol dehydrogenase, N-terminal
N_psidii_MA3_01738	680	Pfam	PF01740	STAS domain	496	625	1.3e-08	IPR002645	STAS domain
N_psidii_MA3_01738	680	Pfam	PF00916	Sulfate permease family	57	434	1.5e-88	IPR011547	SLC26A/SulP transporter domain
N_psidii_MA3_01739	592	Pfam	PF00135	Carboxylesterase family	31	549	2.6e-84	IPR002018	Carboxylesterase, type B
N_psidii_MA3_01741	843	Pfam	PF07477	Glycosyl hydrolase family 67 C-terminus	476	698	9.3e-89	IPR011099	Glycosyl hydrolase family 67, C-terminal
N_psidii_MA3_01741	843	Pfam	PF07488	Glycosyl hydrolase family 67 middle domain	150	474	1.3e-143	IPR011100	Glycosyl hydrolase family 67, catalytic domain
N_psidii_MA3_01741	843	Pfam	PF03648	Glycosyl hydrolase family 67 N-terminus	22	142	2.4e-26	IPR005154	Alpha glucuronidase, N-terminal
N_psidii_MA3_01745	506	Pfam	PF07690	Major Facilitator Superfamily	68	434	1.5e-36	IPR011701	Major facilitator superfamily
N_psidii_MA3_01749	377	Pfam	PF00775	Dioxygenase	106	207	1.7e-09	IPR000627	Intradiol ring-cleavage dioxygenase, C-terminal
N_psidii_MA3_01750	584	Pfam	PF07690	Major Facilitator Superfamily	110	531	1.3e-31	IPR011701	Major facilitator superfamily
N_psidii_MA3_01751	1172	Pfam	PF01077	Nitrite and sulphite reductase 4Fe-4S domain	725	861	6.4e-18	IPR006067	Nitrite/sulphite reductase 4Fe-4S domain
N_psidii_MA3_01751	1172	Pfam	PF03460	Nitrite/Sulfite reductase ferredoxin-like half domain	653	714	3.7e-11	IPR005117	Nitrite/Sulfite reductase ferredoxin-like domain
N_psidii_MA3_01751	1172	Pfam	PF07992	Pyridine nucleotide-disulphide oxidoreductase	36	341	2.3e-38	IPR023753	FAD/NAD(P)-binding domain
N_psidii_MA3_01751	1172	Pfam	PF13806	Rieske-like [2Fe-2S] domain	948	1030	2.9e-10	IPR012748	Nitrite reductase [NAD(P)H] small subunit, NirD
N_psidii_MA3_01751	1172	Pfam	PF04324	BFD-like [2Fe-2S] binding domain	513	561	4.8e-10	IPR007419	BFD-like [2Fe-2S]-binding domain
N_psidii_MA3_01752	980	Pfam	PF00174	Oxidoreductase molybdopterin binding domain	132	322	4.5e-58	IPR000572	Oxidoreductase, molybdopterin-binding domain
N_psidii_MA3_01752	980	Pfam	PF03404	Mo-co oxidoreductase dimerisation domain	351	506	2.6e-48	IPR005066	Moybdenum cofactor oxidoreductase, dimerisation
N_psidii_MA3_01752	980	Pfam	PF00175	Oxidoreductase NAD-binding domain	837	963	1.2e-29	IPR001433	Oxidoreductase FAD/NAD(P)-binding
N_psidii_MA3_01752	980	Pfam	PF00173	Cytochrome b5-like Heme/Steroid binding domain	590	662	1.1e-20	IPR001199	Cytochrome b5-like heme/steroid binding domain
N_psidii_MA3_01752	980	Pfam	PF00970	Oxidoreductase FAD-binding domain	695	815	7.5e-26	IPR008333	Oxidoreductase, FAD-binding domain
N_psidii_MA3_01754	575	Pfam	PF00083	Sugar (and other) transporter	52	526	4.9e-119	IPR005828	Major facilitator, sugar transporter-like
N_psidii_MA3_01755	516	Pfam	PF04366	Las17-binding protein actin regulator	145	272	4.8e-47	IPR007461	Ysc84 actin-binding domain
N_psidii_MA3_01756	760	Pfam	PF05199	GMC oxidoreductase	478	615	1.8e-24	IPR007867	Glucose-methanol-choline oxidoreductase, C-terminal
N_psidii_MA3_01756	760	Pfam	PF00732	GMC oxidoreductase	36	350	9.1e-43	IPR000172	Glucose-methanol-choline oxidoreductase, N-terminal
N_psidii_MA3_01761	589	Pfam	PF07690	Major Facilitator Superfamily	157	535	1.2e-32	IPR011701	Major facilitator superfamily
N_psidii_MA3_01763	275	Pfam	PF06089	L-asparaginase II	25	115	4e-33	IPR010349	L-asparaginase II
N_psidii_MA3_01763	275	Pfam	PF06089	L-asparaginase II	149	265	7.4e-27	IPR010349	L-asparaginase II
N_psidii_MA3_01764	896	Pfam	PF00264	Common central domain of tyrosinase	563	742	1.9e-32	IPR002227	Tyrosinase copper-binding domain
N_psidii_MA3_01764	896	Pfam	PF00296	Luciferase-like monooxygenase	25	327	2.8e-69	IPR011251	Luciferase-like domain
N_psidii_MA3_01769	182	Pfam	PF01266	FAD dependent oxidoreductase	9	81	8.6e-08	IPR006076	FAD dependent oxidoreductase
N_psidii_MA3_01771	369	Pfam	PF00150	Cellulase (glycosyl hydrolase family 5)	1	245	1.3e-39	IPR001547	Glycoside hydrolase, family 5
N_psidii_MA3_01776	594	Pfam	PF13520	Amino acid permease	5	468	2.2e-54	IPR002293	Amino acid/polyamine transporter I
N_psidii_MA3_01777	334	Pfam	PF01593	Flavin containing amine oxidoreductase	35	216	1.7e-09	IPR002937	Amine oxidase
N_psidii_MA3_01778	132	Pfam	PF11951	Fungal specific transcription factor domain	20	72	2e-05	IPR021858	Fungal transcription factor
N_psidii_MA3_01779	565	Pfam	PF00743	Flavin-binding monooxygenase-like	40	230	1.1e-14	IPR020946	Flavin monooxygenase-like
N_psidii_MA3_01780	412	Pfam	PF00144	Beta-lactamase	22	391	9.2e-43	IPR001466	Beta-lactamase-related
N_psidii_MA3_01784	663	Pfam	PF00172	Fungal Zn(2)-Cys(6) binuclear cluster domain	46	82	0.00016	IPR001138	Zn(2)-C6 fungal-type DNA-binding domain
N_psidii_MA3_01785	339	Pfam	PF00248	Aldo/keto reductase family	15	329	6.1e-70	IPR023210	NADP-dependent oxidoreductase domain
N_psidii_MA3_01787	379	Pfam	PF13088	BNR repeat-like domain	29	350	4.9e-67	IPR011040	Sialidase
N_psidii_MA3_01788	322	Pfam	PF01370	NAD dependent epimerase/dehydratase family	8	205	8.9e-23	IPR001509	NAD-dependent epimerase/dehydratase
N_psidii_MA3_01789	502	Pfam	PF00173	Cytochrome b5-like Heme/Steroid binding domain	14	84	1.9e-20	IPR001199	Cytochrome b5-like heme/steroid binding domain
N_psidii_MA3_01789	502	Pfam	PF01070	FMN-dependent dehydrogenase	135	473	8.3e-109	IPR000262	FMN-dependent dehydrogenase
N_psidii_MA3_01790	420	Pfam	PF00701	Dihydrodipicolinate synthetase family	109	398	3.5e-40	IPR002220	DapA-like
N_psidii_MA3_01791	515	Pfam	PF07690	Major Facilitator Superfamily	65	440	9.5e-35	IPR011701	Major facilitator superfamily
N_psidii_MA3_01792	455	Pfam	PF07690	Major Facilitator Superfamily	7	373	5.9e-28	IPR011701	Major facilitator superfamily
N_psidii_MA3_01793	624	Pfam	PF00389	D-isomer specific 2-hydroxyacid dehydrogenase, catalytic domain	226	484	2.8e-07	IPR006139	D-isomer specific 2-hydroxyacid dehydrogenase, catalytic domain
N_psidii_MA3_01793	624	Pfam	PF02826	D-isomer specific 2-hydroxyacid dehydrogenase, NAD binding domain	282	464	7.6e-46	IPR006140	D-isomer specific 2-hydroxyacid dehydrogenase, NAD-binding domain
N_psidii_MA3_01794	178	Pfam	PF13561	Enoyl-(Acyl carrier protein) reductase	69	174	1.3e-13
N_psidii_MA3_01795	607	Pfam	PF00732	GMC oxidoreductase	14	318	7.1e-66	IPR000172	Glucose-methanol-choline oxidoreductase, N-terminal
N_psidii_MA3_01795	607	Pfam	PF05199	GMC oxidoreductase	428	591	8.5e-32	IPR007867	Glucose-methanol-choline oxidoreductase, C-terminal
N_psidii_MA3_01797	231	Pfam	PF11951	Fungal specific transcription factor domain	17	193	9.1e-24	IPR021858	Fungal transcription factor
N_psidii_MA3_01798	372	Pfam	PF00491	Arginase family	49	350	2.6e-90	IPR006035	Ureohydrolase
N_psidii_MA3_01799	545	Pfam	PF01554	MatE	49	210	3.2e-28	IPR002528	Multi antimicrobial extrusion protein
N_psidii_MA3_01799	545	Pfam	PF01554	MatE	276	422	1.5e-26	IPR002528	Multi antimicrobial extrusion protein
N_psidii_MA3_01800	476	Pfam	PF13520	Amino acid permease	54	470	1e-43	IPR002293	Amino acid/polyamine transporter I
N_psidii_MA3_01801	321	Pfam	PF00106	short chain dehydrogenase	26	230	1.5e-31	IPR002347	Short-chain dehydrogenase/reductase SDR
N_psidii_MA3_01802	611	Pfam	PF00743	Flavin-binding monooxygenase-like	71	282	4.7e-15	IPR020946	Flavin monooxygenase-like
N_psidii_MA3_01803	1212	Pfam	PF07690	Major Facilitator Superfamily	63	426	2.7e-31	IPR011701	Major facilitator superfamily
N_psidii_MA3_01803	1212	Pfam	PF04082	Fungal specific transcription factor domain	742	937	1.5e-16	IPR007219	Transcription factor domain, fungi
N_psidii_MA3_01805	593	Pfam	PF13738	Pyridine nucleotide-disulphide oxidoreductase	69	277	1.3e-12
N_psidii_MA3_01806	394	Pfam	PF07859	alpha/beta hydrolase fold	134	356	1.6e-46	IPR013094	Alpha/beta hydrolase fold-3
N_psidii_MA3_01807	284	Pfam	PF13561	Enoyl-(Acyl carrier protein) reductase	34	269	1.2e-58
N_psidii_MA3_01808	339	Pfam	PF00107	Zinc-binding dehydrogenase	183	259	2.3e-07	IPR013149	Alcohol dehydrogenase, C-terminal
N_psidii_MA3_01809	357	Pfam	PF13193	AMP-binding enzyme C-terminal domain	255	336	3.1e-13	IPR025110	AMP-binding enzyme, C-terminal domain
N_psidii_MA3_01809	357	Pfam	PF00501	AMP-binding enzyme	1	249	3.8e-51	IPR000873	AMP-dependent synthetase/ligase
N_psidii_MA3_01815	489	Pfam	PF00004	ATPase family associated with various cellular activities (AAA)	267	394	5.6e-23	IPR003959	ATPase, AAA-type, core
N_psidii_MA3_01815	489	Pfam	PF08740	BCS1 N terminal	54	229	3.5e-35	IPR014851	BCS1, N-terminal
N_psidii_MA3_01817	340	Pfam	PF06985	Heterokaryon incompatibility protein (HET)	127	251	4e-18	IPR010730	Heterokaryon incompatibility
N_psidii_MA3_01819	419	Pfam	PF06330	Trichodiene synthase (TRI5)	117	367	2.2e-16	IPR024652	Trichodiene synthase
N_psidii_MA3_01823	256	Pfam	PF05630	Necrosis inducing protein (NPP1)	41	242	2e-55	IPR008701	Necrosis inducing protein
N_psidii_MA3_01824	367	Pfam	PF08240	Alcohol dehydrogenase GroES-like domain	30	140	5.5e-28	IPR013154	Alcohol dehydrogenase, N-terminal
N_psidii_MA3_01824	367	Pfam	PF00107	Zinc-binding dehydrogenase	181	314	6.8e-21	IPR013149	Alcohol dehydrogenase, C-terminal
N_psidii_MA3_01825	547	Pfam	PF00172	Fungal Zn(2)-Cys(6) binuclear cluster domain	48	83	3.8e-08	IPR001138	Zn(2)-C6 fungal-type DNA-binding domain
N_psidii_MA3_01826	513	Pfam	PF06964	Alpha-L-arabinofuranosidase C-terminal domain	312	505	3.4e-29	IPR010720	Alpha-L-arabinofuranosidase, C-terminal
N_psidii_MA3_01829	283	Pfam	PF11807	Domain of unknown function (DUF3328)	48	254	1.4e-51	IPR021765	Mycotoxin biosynthesis protein UstYa-like
N_psidii_MA3_01832	299	Pfam	PF00106	short chain dehydrogenase	47	231	3.6e-39	IPR002347	Short-chain dehydrogenase/reductase SDR
N_psidii_MA3_01833	185	Pfam	PF13602	Zinc-binding dehydrogenase	61	182	7.7e-11
N_psidii_MA3_01835	515	Pfam	PF03473	MOSC domain	209	327	2.2e-25	IPR005302	Molybdenum cofactor sulfurase, C-terminal
N_psidii_MA3_01835	515	Pfam	PF03476	MOSC N-terminal beta barrel domain	12	49	1.9e-06	IPR005303	MOSC, N-terminal beta barrel
N_psidii_MA3_01836	515	Pfam	PF11951	Fungal specific transcription factor domain	103	465	3.9e-27	IPR021858	Fungal transcription factor
N_psidii_MA3_01836	515	Pfam	PF00172	Fungal Zn(2)-Cys(6) binuclear cluster domain	12	45	6.9e-08	IPR001138	Zn(2)-C6 fungal-type DNA-binding domain
N_psidii_MA3_01837	501	Pfam	PF00171	Aldehyde dehydrogenase family	31	493	7.1e-179	IPR015590	Aldehyde dehydrogenase domain
N_psidii_MA3_01839	530	Pfam	PF07690	Major Facilitator Superfamily	62	484	2.4e-34	IPR011701	Major facilitator superfamily
N_psidii_MA3_01842	681	Pfam	PF01055	Glycosyl hydrolases family 31	231	681	5.5e-111	IPR000322	Glycoside hydrolase family 31
N_psidii_MA3_01843	533	Pfam	PF00083	Sugar (and other) transporter	58	509	5.2e-84	IPR005828	Major facilitator, sugar transporter-like
N_psidii_MA3_01844	381	Pfam	PF02133	Permease for cytosine/purines, uracil, thiamine, allantoin	2	307	8.8e-64	IPR001248	Purine-cytosine permease
N_psidii_MA3_01845	998	Pfam	PF01968	Hydantoinase/oxoprolinase	210	415	1.2e-26	IPR002821	Hydantoinase A/oxoprolinase
N_psidii_MA3_01845	998	Pfam	PF05378	Hydantoinase/oxoprolinase N-terminal region	8	190	8.7e-24	IPR008040	Hydantoinaseoxoprolinase, N-terminal
N_psidii_MA3_01845	998	Pfam	PF06032	Protein of unknown function (DUF917)	602	983	5.3e-122	IPR010318	Protein of unknown function DUF917
N_psidii_MA3_01848	367	Pfam	PF13813	Membrane bound O-acyl transferase family	201	287	2.1e-15	IPR032805	Wax synthase domain
N_psidii_MA3_01849	199	Pfam	PF00717	Peptidase S24-like	67	113	2e-05	IPR015927	Peptidase S24/S26A/S26B/S26C
N_psidii_MA3_01850	301	Pfam	PF03372	Endonuclease/Exonuclease/phosphatase family	66	281	3.2e-08	IPR005135	Endonuclease/exonuclease/phosphatase
N_psidii_MA3_01853	472	Pfam	PF07632	Protein of unknown function (DUF1593)	38	302	3.3e-95	IPR011483	Protein of unknown function DUF1593
N_psidii_MA3_01858	370	Pfam	PF08613	Cyclin	195	325	1.7e-42	IPR013922	Cyclin PHO80-like
N_psidii_MA3_01862	688	Pfam	PF02776	Thiamine pyrophosphate enzyme, N-terminal TPP binding domain	106	288	9.7e-37	IPR012001	Thiamine pyrophosphate enzyme, N-terminal TPP-binding domain
N_psidii_MA3_01862	688	Pfam	PF02775	Thiamine pyrophosphate enzyme, C-terminal TPP binding domain	517	682	9.1e-22	IPR011766	Thiamine pyrophosphate enzyme, C-terminal TPP-binding
N_psidii_MA3_01862	688	Pfam	PF00205	Thiamine pyrophosphate enzyme, central domain	310	416	1.7e-09	IPR012000	Thiamine pyrophosphate enzyme, central domain
N_psidii_MA3_01863	553	Pfam	PF08031	Berberine and berberine like	443	488	3.5e-12	IPR012951	Berberine/berberine-like
N_psidii_MA3_01863	553	Pfam	PF01565	FAD binding domain	49	152	2.3e-20	IPR006094	FAD linked oxidase, N-terminal
N_psidii_MA3_01864	206	Pfam	PF00199	Catalase	62	113	7.2e-11	IPR011614	Catalase core domain
N_psidii_MA3_01866	451	Pfam	PF03721	UDP-glucose/GDP-mannose dehydrogenase family, NAD binding domain	65	215	1.3e-11	IPR001732	UDP-glucose/GDP-mannose dehydrogenase, N-terminal
N_psidii_MA3_01866	451	Pfam	PF00984	UDP-glucose/GDP-mannose dehydrogenase family, central domain	243	315	1.1e-19	IPR014026	UDP-glucose/GDP-mannose dehydrogenase, dimerisation
N_psidii_MA3_01869	507	Pfam	PF01522	Polysaccharide deacetylase	157	282	2.8e-26	IPR002509	NodB homology domain
N_psidii_MA3_01870	712	Pfam	PF03142	Chitin synthase	306	660	8.7e-34
N_psidii_MA3_01870	712	Pfam	PF03142	Chitin synthase	206	264	4.5e-07
N_psidii_MA3_01871	665	Pfam	PF04616	Glycosyl hydrolases family 43	72	272	5.2e-12	IPR006710	Glycoside hydrolase, family 43
N_psidii_MA3_01871	665	Pfam	PF04616	Glycosyl hydrolases family 43	359	640	1.4e-56	IPR006710	Glycoside hydrolase, family 43
N_psidii_MA3_01873	519	Pfam	PF04389	Peptidase family M28	275	460	5.1e-41	IPR007484	Peptidase M28
N_psidii_MA3_01873	519	Pfam	PF02225	PA domain	154	245	1.1e-10	IPR003137	PA domain
N_psidii_MA3_01875	519	Pfam	PF00291	Pyridoxal-phosphate dependent enzyme	19	317	1.2e-66	IPR001926	Pyridoxal-phosphate dependent enzyme
N_psidii_MA3_01875	519	Pfam	PF00571	CBS domain	372	422	1e-09	IPR000644	CBS domain
N_psidii_MA3_01876	285	Pfam	PF09439	Signal recognition particle receptor beta subunit	46	254	6.1e-32	IPR019009	Signal recognition particle receptor, beta subunit
N_psidii_MA3_01877	722	Pfam	PF12796	Ankyrin repeats (3 copies)	153	240	2.1e-10	IPR020683	Ankyrin repeat-containing domain
N_psidii_MA3_01877	722	Pfam	PF12796	Ankyrin repeats (3 copies)	53	146	3.4e-14	IPR020683	Ankyrin repeat-containing domain
N_psidii_MA3_01877	722	Pfam	PF01529	DHHC palmitoyltransferase	445	578	8e-35	IPR001594	Palmitoyltransferase, DHHC domain
N_psidii_MA3_01883	484	Pfam	PF01490	Transmembrane amino acid transporter protein	68	462	4.5e-52	IPR013057	Amino acid transporter, transmembrane domain
N_psidii_MA3_01885	514	Pfam	PF00743	Flavin-binding monooxygenase-like	45	356	3.2e-13	IPR020946	Flavin monooxygenase-like
N_psidii_MA3_01888	624	Pfam	PF08030	Ferric reductase NAD binding domain	413	597	7.7e-09	IPR013121	Ferric reductase, NAD binding domain
N_psidii_MA3_01888	624	Pfam	PF01794	Ferric reductase like transmembrane component	141	256	2.8e-15	IPR013130	Ferric reductase transmembrane component-like domain
N_psidii_MA3_01888	624	Pfam	PF08022	FAD-binding domain	327	407	1.1e-09	IPR013112	FAD-binding 8
N_psidii_MA3_01891	1472	Pfam	PF00664	ABC transporter transmembrane region	965	1187	1.1e-18	IPR011527	ABC transporter type 1, transmembrane domain
N_psidii_MA3_01891	1472	Pfam	PF00005	ABC transporter	1259	1400	4.9e-25	IPR003439	ABC transporter-like
N_psidii_MA3_01891	1472	Pfam	PF00005	ABC transporter	658	792	5.6e-14	IPR003439	ABC transporter-like
N_psidii_MA3_01892	395	Pfam	PF00324	Amino acid permease	2	355	3.5e-83	IPR004841	Amino acid permease/ SLC12A domain
N_psidii_MA3_01896	1680	Pfam	PF12906	RING-variant domain	39	85	5.6e-17	IPR011016	Zinc finger, RING-CH-type
N_psidii_MA3_01899	578	Pfam	PF04880	NUDE protein, C-terminal conserved region	131	281	6.5e-42	IPR006964	NUDE domain
N_psidii_MA3_01903	2283	Pfam	PF01039	Carboxyl transferase domain	1616	2168	1.7e-187	IPR034733	Acetyl-CoA carboxylase
N_psidii_MA3_01903	2283	Pfam	PF00364	Biotin-requiring enzyme	705	769	8.5e-18	IPR000089	Biotin/lipoyl attachment
N_psidii_MA3_01903	2283	Pfam	PF00289	Biotin carboxylase, N-terminal domain	63	184	3.7e-27	IPR005481	Biotin carboxylase-like, N-terminal domain
N_psidii_MA3_01903	2283	Pfam	PF02785	Biotin carboxylase C-terminal domain	460	567	3.7e-19	IPR005482	Biotin carboxylase, C-terminal
N_psidii_MA3_01903	2283	Pfam	PF02786	Carbamoyl-phosphate synthase L chain, ATP binding domain	232	416	5.4e-52	IPR005479	Carbamoyl-phosphate synthetase large subunit-like, ATP-binding domain
N_psidii_MA3_01903	2283	Pfam	PF08326	Acetyl-CoA carboxylase, central region	771	1514	2.2e-279	IPR013537	Acetyl-CoA carboxylase, central domain
N_psidii_MA3_01904	291	Pfam	PF01722	BolA-like protein	170	229	4.6e-09	IPR002634	BolA protein
N_psidii_MA3_01908	743	Pfam	PF00172	Fungal Zn(2)-Cys(6) binuclear cluster domain	12	49	2.8e-09	IPR001138	Zn(2)-C6 fungal-type DNA-binding domain
N_psidii_MA3_01908	743	Pfam	PF04082	Fungal specific transcription factor domain	258	381	7.6e-06	IPR007219	Transcription factor domain, fungi
N_psidii_MA3_01910	421	Pfam	PF01546	Peptidase family M20/M25/M40	85	304	1.1e-08	IPR002933	Peptidase M20
N_psidii_MA3_01913	443	Pfam	PF00793	DAHP synthetase I family	43	345	2.4e-92	IPR006218	DAHP synthetase I/KDSA
N_psidii_MA3_01915	958	Pfam	PF13802	Galactose mutarotase-like	173	236	1.6e-12	IPR025887	Glycoside hydrolase family 31, N-terminal domain
N_psidii_MA3_01915	958	Pfam	PF01055	Glycosyl hydrolases family 31	261	840	4.3e-146	IPR000322	Glycoside hydrolase family 31
N_psidii_MA3_01915	958	Pfam	PF16863	N-terminal barrel of NtMGAM and CtMGAM, maltase-glucoamylase	57	170	1.5e-36	IPR031727	Galactose mutarotase, N-terminal barrel
N_psidii_MA3_01918	473	Pfam	PF00425	chorismate binding enzyme	206	457	1.1e-61	IPR015890	Chorismate-utilising enzyme, C-terminal
N_psidii_MA3_01921	218	Pfam	PF00999	Sodium/hydrogen exchanger family	11	176	3.2e-26	IPR006153	Cation/H+ exchanger
N_psidii_MA3_01924	903	Pfam	PF06280	Fn3-like domain	611	723	5.3e-17	IPR010435	Fn3-like domain
N_psidii_MA3_01924	903	Pfam	PF02225	PA domain	378	432	1.6e-06	IPR003137	PA domain
N_psidii_MA3_01924	903	Pfam	PF00082	Subtilase family	152	578	2.9e-43	IPR000209	Peptidase S8/S53 domain
N_psidii_MA3_01926	635	Pfam	PF05746	DALR anticodon binding domain	518	635	6.7e-30	IPR008909	DALR anticodon binding
N_psidii_MA3_01926	635	Pfam	PF03485	Arginyl tRNA synthetase N terminal domain	36	115	6.5e-07	IPR005148	Arginyl tRNA synthetase N-terminal domain
N_psidii_MA3_01926	635	Pfam	PF00750	tRNA synthetases class I (R)	152	503	6.3e-98	IPR035684	Arginyl-tRNA synthetase, catalytic core domain
N_psidii_MA3_01927	693	Pfam	PF07690	Major Facilitator Superfamily	54	422	3.8e-36	IPR011701	Major facilitator superfamily
N_psidii_MA3_01933	161	Pfam	PF05670	Domain of unknown function (DUF814)	11	47	0.00014	IPR008532	Domain of unknown function DUF814
N_psidii_MA3_01937	492	Pfam	PF00232	Glycosyl hydrolase family 1	13	483	8.4e-133	IPR001360	Glycoside hydrolase family 1
N_psidii_MA3_01939	551	Pfam	PF00557	Metallopeptidase family M24	271	529	6.3e-57	IPR000994	Peptidase M24
N_psidii_MA3_01939	551	Pfam	PF05195	Aminopeptidase P, N-terminal domain	114	224	8.4e-27	IPR007865	Aminopeptidase P, N-terminal
N_psidii_MA3_01941	634	Pfam	PF01687	Riboflavin kinase	429	561	1.2e-10	IPR015865	Riboflavin kinase domain, bacterial/eukaryotic
N_psidii_MA3_01946	758	Pfam	PF03370	Carbohydrate/starch-binding module (family 21)	321	428	3.3e-33	IPR005036	CBM21 (carbohydrate binding type-21) domain
N_psidii_MA3_01954	401	Pfam	PF13520	Amino acid permease	9	376	1.3e-40	IPR002293	Amino acid/polyamine transporter I
N_psidii_MA3_01957	200	Pfam	PF00241	Cofilin/tropomyosin-type actin-binding protein	10	132	2.1e-20	IPR002108	Actin-depolymerising factor homology domain
N_psidii_MA3_01958	830	Pfam	PF07690	Major Facilitator Superfamily	447	736	2e-19	IPR011701	Major facilitator superfamily
N_psidii_MA3_01959	528	Pfam	PF00172	Fungal Zn(2)-Cys(6) binuclear cluster domain	117	160	8.1e-05	IPR001138	Zn(2)-C6 fungal-type DNA-binding domain
N_psidii_MA3_01962	173	Pfam	PF09351	Domain of unknown function (DUF1993)	6	167	4.9e-52	IPR018531	Protein of unknown function DUF1993
N_psidii_MA3_01963	502	Pfam	PF11951	Fungal specific transcription factor domain	116	476	9.8e-28	IPR021858	Fungal transcription factor
N_psidii_MA3_01963	502	Pfam	PF00172	Fungal Zn(2)-Cys(6) binuclear cluster domain	15	49	0.0002	IPR001138	Zn(2)-C6 fungal-type DNA-binding domain
N_psidii_MA3_01964	419	Pfam	PF04479	RTA1 like protein	94	315	6.8e-41	IPR007568	RTA-like protein
N_psidii_MA3_01966	1081	Pfam	PF03659	Glycosyl hydrolase family 71	1006	1078	1.7e-12	IPR005197	Glycoside hydrolase family 71
N_psidii_MA3_01966	1081	Pfam	PF12796	Ankyrin repeats (3 copies)	800	886	3.4e-14	IPR020683	Ankyrin repeat-containing domain
N_psidii_MA3_01966	1081	Pfam	PF17100	N-terminal domain of NWD NACHT-NTPase	19	189	4.9e-22	IPR031359	NWD NACHT-NTPase, N-terminal
N_psidii_MA3_01968	622	Pfam	PF00067	Cytochrome P450	241	501	6.7e-24	IPR001128	Cytochrome P450
N_psidii_MA3_01969	385	Pfam	PF08240	Alcohol dehydrogenase GroES-like domain	30	141	2.4e-27	IPR013154	Alcohol dehydrogenase, N-terminal
N_psidii_MA3_01969	385	Pfam	PF13823	Alcohol dehydrogenase GroES-associated	6	27	6.1e-09	IPR027399	Alcohol dehydrogenase GroES-associated
N_psidii_MA3_01969	385	Pfam	PF00107	Zinc-binding dehydrogenase	190	258	2.8e-09	IPR013149	Alcohol dehydrogenase, C-terminal
N_psidii_MA3_01970	280	Pfam	PF00248	Aldo/keto reductase family	35	266	2.3e-38	IPR023210	NADP-dependent oxidoreductase domain
N_psidii_MA3_01971	1023	Pfam	PF07993	Male sterility protein	636	880	2.3e-35	IPR013120	Male sterility, NAD-binding
N_psidii_MA3_01971	1023	Pfam	PF00501	AMP-binding enzyme	30	309	1.3e-19	IPR000873	AMP-dependent synthetase/ligase
N_psidii_MA3_01972	518	Pfam	PF00083	Sugar (and other) transporter	13	471	1e-104	IPR005828	Major facilitator, sugar transporter-like
N_psidii_MA3_01974	149	Pfam	PF02734	DAK2 domain	1	138	7.6e-31	IPR004007	DhaL domain
N_psidii_MA3_01975	662	Pfam	PF00172	Fungal Zn(2)-Cys(6) binuclear cluster domain	29	59	6.6e-05	IPR001138	Zn(2)-C6 fungal-type DNA-binding domain
N_psidii_MA3_01975	662	Pfam	PF11951	Fungal specific transcription factor domain	306	652	4.2e-14	IPR021858	Fungal transcription factor
N_psidii_MA3_01976	326	Pfam	PF13561	Enoyl-(Acyl carrier protein) reductase	47	289	1.5e-51
N_psidii_MA3_01977	494	Pfam	PF00456	Transketolase, thiamine diphosphate binding domain	36	364	1.7e-126	IPR005474	Transketolase, N-terminal
N_psidii_MA3_01977	494	Pfam	PF02779	Transketolase, pyrimidine binding domain	395	481	8.3e-12	IPR005475	Transketolase-like, pyrimidine-binding domain
N_psidii_MA3_01978	324	Pfam	PF02779	Transketolase, pyrimidine binding domain	3	78	4.2e-18	IPR005475	Transketolase-like, pyrimidine-binding domain
N_psidii_MA3_01979	425	Pfam	PF00083	Sugar (and other) transporter	162	420	3.1e-40	IPR005828	Major facilitator, sugar transporter-like
N_psidii_MA3_01980	434	Pfam	PF00107	Zinc-binding dehydrogenase	213	348	1.2e-13	IPR013149	Alcohol dehydrogenase, C-terminal
N_psidii_MA3_01980	434	Pfam	PF08240	Alcohol dehydrogenase GroES-like domain	63	173	1.3e-30	IPR013154	Alcohol dehydrogenase, N-terminal
N_psidii_MA3_01981	525	Pfam	PF07632	Protein of unknown function (DUF1593)	40	308	5.2e-91	IPR011483	Protein of unknown function DUF1593
N_psidii_MA3_01982	326	Pfam	PF00248	Aldo/keto reductase family	17	305	1.5e-49	IPR023210	NADP-dependent oxidoreductase domain
N_psidii_MA3_01985	448	Pfam	PF11951	Fungal specific transcription factor domain	84	438	1.1e-17	IPR021858	Fungal transcription factor
N_psidii_MA3_01986	268	Pfam	PF13350	Tyrosine phosphatase family	10	260	5.6e-60	IPR026893	Tyrosine/serine-protein phosphatase IphP-type
N_psidii_MA3_01987	272	Pfam	PF12298	Eukaryotic mitochondrial regulator protein	28	194	4.6e-51	IPR021036	Ribosomal protein S35, mitochondrial
N_psidii_MA3_01988	809	Pfam	PF00072	Response regulator receiver domain	612	692	3.1e-15	IPR001789	Signal transduction response regulator, receiver domain
N_psidii_MA3_01990	248	Pfam	PF01596	O-methyltransferase	45	245	2.5e-25	IPR002935	O-methyltransferase, family 3
N_psidii_MA3_01991	199	Pfam	PF09747	Coiled-coil domain containing protein (DUF2052)	118	174	1.8e-14	IPR018613	Protein of unknown function DUF2052, coiled-coil
N_psidii_MA3_01991	199	Pfam	PF09747	Coiled-coil domain containing protein (DUF2052)	27	90	6e-12	IPR018613	Protein of unknown function DUF2052, coiled-coil
N_psidii_MA3_01993	326	Pfam	PF04616	Glycosyl hydrolases family 43	65	318	8.7e-28	IPR006710	Glycoside hydrolase, family 43
N_psidii_MA3_01994	1150	Pfam	PF01764	Lipase (class 3)	834	999	7.7e-13	IPR002921	Fungal lipase-like domain
N_psidii_MA3_01995	177	Pfam	PF00583	Acetyltransferase (GNAT) family	66	157	1e-09	IPR000182	GNAT domain
N_psidii_MA3_01996	260	Pfam	PF13561	Enoyl-(Acyl carrier protein) reductase	19	257	4.4e-56
N_psidii_MA3_01997	385	Pfam	PF00107	Zinc-binding dehydrogenase	185	330	1.2e-13	IPR013149	Alcohol dehydrogenase, C-terminal
N_psidii_MA3_01997	385	Pfam	PF08240	Alcohol dehydrogenase GroES-like domain	31	145	1.6e-27	IPR013154	Alcohol dehydrogenase, N-terminal
N_psidii_MA3_01998	374	Pfam	PF00248	Aldo/keto reductase family	82	345	2.3e-40	IPR023210	NADP-dependent oxidoreductase domain
N_psidii_MA3_01999	319	Pfam	PF11416	Syntaxin-5 N-terminal, Sly1p-binding domain	4	23	2.3e-09	IPR021538	Syntaxin-5, N-terminal, Sly1p-binding domain
N_psidii_MA3_01999	319	Pfam	PF05739	SNARE domain	263	315	2.5e-14	IPR000727	Target SNARE coiled-coil homology domain
N_psidii_MA3_02002	671	Pfam	PF06428	GDP/GTP exchange factor Sec2p	178	271	3.8e-29	IPR009449	GDP/GTP exchange factor Sec2, N-terminal
N_psidii_MA3_02003	975	Pfam	PF02815	MIR domain	377	554	1.5e-46	IPR016093	MIR motif
N_psidii_MA3_02003	975	Pfam	PF16192	C-terminal four TMM region of protein-O-mannosyltransferase	578	776	1.8e-67	IPR032421	Protein O-mannosyl-transferase, C-terminal four TM domain
N_psidii_MA3_02003	975	Pfam	PF02366	Dolichyl-phosphate-mannose-protein mannosyltransferase	82	329	2.3e-80	IPR003342	Glycosyl transferase family 39/83
N_psidii_MA3_02004	539	Pfam	PF12230	Pre-mRNA splicing factor PRP21 like protein	204	475	6.2e-54	IPR022030	Splicing factor 3A subunit 1
N_psidii_MA3_02004	539	Pfam	PF01805	Surp module	126	177	4.9e-18	IPR000061	SWAP/Surp
N_psidii_MA3_02004	539	Pfam	PF01805	Surp module	28	78	2.5e-20	IPR000061	SWAP/Surp
N_psidii_MA3_02005	142	Pfam	PF00787	PX domain	21	133	7.2e-24	IPR001683	Phox homologous domain
N_psidii_MA3_02007	386	Pfam	PF00153	Mitochondrial carrier protein	177	272	2.5e-23	IPR018108	Mitochondrial substrate/solute carrier
N_psidii_MA3_02007	386	Pfam	PF00153	Mitochondrial carrier protein	293	384	1.3e-20	IPR018108	Mitochondrial substrate/solute carrier
N_psidii_MA3_02007	386	Pfam	PF00153	Mitochondrial carrier protein	58	169	2.6e-24	IPR018108	Mitochondrial substrate/solute carrier
N_psidii_MA3_02009	81	Pfam	PF01423	LSM domain	1	64	1.2e-18	IPR001163	LSM domain, eukaryotic/archaea-type
N_psidii_MA3_02011	524	Pfam	PF00789	UBX domain	408	502	2.5e-07	IPR001012	UBX domain
N_psidii_MA3_02011	524	Pfam	PF14555	UBA-like domain	16	56	7.1e-11
N_psidii_MA3_02013	509	Pfam	PF03127	GAT domain	234	310	3.2e-18	IPR004152	GAT domain
N_psidii_MA3_02013	509	Pfam	PF00790	VHS domain	70	179	4.1e-07	IPR002014	VHS domain
N_psidii_MA3_02023	558	Pfam	PF00172	Fungal Zn(2)-Cys(6) binuclear cluster domain	249	289	1.2e-07	IPR001138	Zn(2)-C6 fungal-type DNA-binding domain
N_psidii_MA3_02029	232	Pfam	PF13489	Methyltransferase domain	29	194	2.9e-12
N_psidii_MA3_02030	249	Pfam	PF00300	Histidine phosphatase superfamily (branch 1)	6	228	6.1e-36	IPR013078	Histidine phosphatase superfamily, clade-1
N_psidii_MA3_02033	562	Pfam	PF00240	Ubiquitin family	12	82	9.8e-12	IPR000626	Ubiquitin domain
N_psidii_MA3_02033	562	Pfam	PF00443	Ubiquitin carboxyl-terminal hydrolase	118	549	3.6e-43	IPR001394	Peptidase C19, ubiquitin carboxyl-terminal hydrolase
N_psidii_MA3_02034	214	Pfam	PF05856	ARP2/3 complex 20 kDa subunit (ARPC4)	46	211	2.8e-79	IPR008384	Actin-related protein 2/3 complex subunit 4
N_psidii_MA3_02036	416	Pfam	PF00650	CRAL/TRIO domain	112	272	2.9e-14	IPR001251	CRAL-TRIO lipid binding domain
N_psidii_MA3_02039	816	Pfam	PF00856	SET domain	457	562	3.7e-15	IPR001214	SET domain
N_psidii_MA3_02042	437	Pfam	PF01529	DHHC palmitoyltransferase	143	263	5.7e-24	IPR001594	Palmitoyltransferase, DHHC domain
N_psidii_MA3_02044	662	Pfam	PF11799	impB/mucB/samB family C-terminal domain	356	471	3.4e-12	IPR017961	DNA polymerase, Y-family, little finger domain
N_psidii_MA3_02044	662	Pfam	PF00817	impB/mucB/samB family	47	273	7.2e-41	IPR001126	UmuC domain
N_psidii_MA3_02046	961	Pfam	PF09797	N-acetyltransferase B complex (NatB) non catalytic subunit	299	682	1.3e-45	IPR019183	N-acetyltransferase B complex, non-catalytic subunit
N_psidii_MA3_02047	569	Pfam	PF00432	Prenyltransferase and squalene oxidase repeat	299	324	2.5e-06	IPR001330	PFTB repeat
N_psidii_MA3_02047	569	Pfam	PF00432	Prenyltransferase and squalene oxidase repeat	60	110	2.4e-06	IPR001330	PFTB repeat
N_psidii_MA3_02047	569	Pfam	PF00432	Prenyltransferase and squalene oxidase repeat	126	166	0.00011	IPR001330	PFTB repeat
N_psidii_MA3_02047	569	Pfam	PF00432	Prenyltransferase and squalene oxidase repeat	332	373	0.0079	IPR001330	PFTB repeat
N_psidii_MA3_02047	569	Pfam	PF00432	Prenyltransferase and squalene oxidase repeat	187	229	8.5e-07	IPR001330	PFTB repeat
N_psidii_MA3_02048	193	Pfam	PF10311	Increased loss of mitochondrial DNA protein 1	4	180	1.1e-64	IPR018815	Increased loss of mitochondrial DNA protein 1
N_psidii_MA3_02049	890	Pfam	PF00069	Protein kinase domain	39	286	8.5e-67	IPR000719	Protein kinase domain
N_psidii_MA3_02052	408	Pfam	PF01546	Peptidase family M20/M25/M40	115	403	3.6e-20	IPR002933	Peptidase M20
N_psidii_MA3_02052	408	Pfam	PF07687	Peptidase dimerisation domain	220	323	1.8e-16	IPR011650	Peptidase M20, dimerisation domain
N_psidii_MA3_02053	380	Pfam	PF01008	Initiation factor 2 subunit family	46	365	1.4e-76	IPR000649	Initiation factor 2B-related
N_psidii_MA3_02054	1515	Pfam	PF12584	Trafficking protein particle complex subunit 10, TRAPPC10	1328	1479	3.9e-25	IPR022233	TRAPP II complex, TRAPPC10
N_psidii_MA3_02055	860	Pfam	PF07690	Major Facilitator Superfamily	309	709	2.1e-41	IPR011701	Major facilitator superfamily
N_psidii_MA3_02058	172	Pfam	PF05821	NADH-ubiquinone oxidoreductase ASHI subunit (CI-ASHI or NDUFB8)	56	99	1.9e-07	IPR008699	NADH dehydrogenase [ubiquinone] 1 beta subcomplex subunit 8
N_psidii_MA3_02059	1751	Pfam	PF00271	Helicase conserved C-terminal domain	1436	1548	8.2e-18	IPR001650	Helicase, C-terminal
N_psidii_MA3_02059	1751	Pfam	PF00176	SNF2 family N-terminal domain	890	1172	1.2e-65	IPR000330	SNF2-related, N-terminal domain
N_psidii_MA3_02060	576	Pfam	PF00067	Cytochrome P450	71	531	2.5e-67	IPR001128	Cytochrome P450
N_psidii_MA3_02062	359	Pfam	PF00172	Fungal Zn(2)-Cys(6) binuclear cluster domain	18	55	2.1e-08	IPR001138	Zn(2)-C6 fungal-type DNA-binding domain
N_psidii_MA3_02065	467	Pfam	PF04488	Glycosyltransferase sugar-binding region containing DXD motif	213	256	1.8e-10	IPR007577	Glycosyltransferase, DXD sugar-binding motif
N_psidii_MA3_02067	503	Pfam	PF12697	Alpha/beta hydrolase family	141	401	2.5e-06	IPR000073	Alpha/beta hydrolase fold-1
N_psidii_MA3_02071	197	Pfam	PF00107	Zinc-binding dehydrogenase	30	157	4.3e-18	IPR013149	Alcohol dehydrogenase, C-terminal
N_psidii_MA3_02072	645	Pfam	PF06985	Heterokaryon incompatibility protein (HET)	73	235	4.4e-36	IPR010730	Heterokaryon incompatibility
N_psidii_MA3_02074	161	Pfam	PF10224	Predicted coiled-coil protein (DUF2205)	84	157	1.3e-35	IPR019357	Short coiled-coil protein
N_psidii_MA3_02085	790	Pfam	PF02333	Phytase	454	789	3.4e-66	IPR003431	Beta propeller phytase
N_psidii_MA3_02086	223	Pfam	PF01161	Phosphatidylethanolamine-binding protein	87	209	7e-16	IPR008914	Phosphatidylethanolamine-binding protein
N_psidii_MA3_02090	1136	Pfam	PF13374	Tetratricopeptide repeat	52	91	0.0047
N_psidii_MA3_02090	1136	Pfam	PF12770	CHAT domain	825	1108	7.1e-38	IPR024983	CHAT domain
N_psidii_MA3_02092	236	Pfam	PF01083	Cutinase	24	229	1.3e-55	IPR000675	Cutinase/acetylxylan esterase
N_psidii_MA3_02093	237	Pfam	PF05891	AdoMet dependent proline di-methyltransferase	18	236	5.3e-76	IPR008576	Alpha-N-methyltransferase NTM1
N_psidii_MA3_02095	580	Pfam	PF00387	Phosphatidylinositol-specific phospholipase C, Y domain	307	422	6.3e-35	IPR001711	Phospholipase C, phosphatidylinositol-specific, Y domain
N_psidii_MA3_02095	580	Pfam	PF00388	Phosphatidylinositol-specific phospholipase C, X domain	103	262	6.2e-46	IPR000909	Phosphatidylinositol-specific phospholipase C, X domain
N_psidii_MA3_02097	581	Pfam	PF12224	Putative amidoligase enzyme	148	350	2.5e-09	IPR022025	Putative amidoligase enzyme
N_psidii_MA3_02099	575	Pfam	PF00199	Catalase	36	418	2.5e-175	IPR011614	Catalase core domain
N_psidii_MA3_02099	575	Pfam	PF06628	Catalase-related immune-responsive	451	510	2.4e-13	IPR010582	Catalase immune-responsive domain
N_psidii_MA3_02101	170	Pfam	PF12296	Hydrophobic surface binding protein A	20	138	3.4e-26	IPR021054	Cell wall mannoprotein 1
N_psidii_MA3_02102	393	Pfam	PF01063	Amino-transferase class IV	65	305	1.3e-23	IPR001544	Aminotransferase class IV
N_psidii_MA3_02103	799	Pfam	PF02358	Trehalose-phosphatase	542	782	1.3e-43	IPR003337	Trehalose-phosphatase
N_psidii_MA3_02103	799	Pfam	PF00982	Glycosyltransferase family 20	47	505	2.1e-166	IPR001830	Glycosyl transferase, family 20
N_psidii_MA3_02108	457	Pfam	PF00400	WD domain, G-beta repeat	169	207	7.1e-06	IPR001680	WD40 repeat
N_psidii_MA3_02108	457	Pfam	PF00400	WD domain, G-beta repeat	122	159	9.1e-11	IPR001680	WD40 repeat
N_psidii_MA3_02108	457	Pfam	PF00400	WD domain, G-beta repeat	424	455	4.9e-07	IPR001680	WD40 repeat
N_psidii_MA3_02108	457	Pfam	PF00400	WD domain, G-beta repeat	82	117	0.0029	IPR001680	WD40 repeat
N_psidii_MA3_02108	457	Pfam	PF00400	WD domain, G-beta repeat	213	249	3.8e-05	IPR001680	WD40 repeat
N_psidii_MA3_02108	457	Pfam	PF00400	WD domain, G-beta repeat	340	372	1.6e-07	IPR001680	WD40 repeat
N_psidii_MA3_02108	457	Pfam	PF00400	WD domain, G-beta repeat	377	414	4.8e-06	IPR001680	WD40 repeat
N_psidii_MA3_02110	600	Pfam	PF05188	MutS domain II	91	224	2.1e-09	IPR007860	DNA mismatch repair protein MutS, connector domain
N_psidii_MA3_02110	600	Pfam	PF05190	MutS family domain IV	430	519	5.3e-08	IPR007861	DNA mismatch repair protein MutS, clamp
N_psidii_MA3_02110	600	Pfam	PF05192	MutS domain III	252	561	3.2e-27	IPR007696	DNA mismatch repair protein MutS, core
N_psidii_MA3_02111	279	Pfam	PF00488	MutS domain V	26	217	4.3e-63	IPR000432	DNA mismatch repair protein MutS, C-terminal
N_psidii_MA3_02113	850	Pfam	PF01031	Dynamin central region	274	560	5.9e-15	IPR000375	Dynamin central domain
N_psidii_MA3_02113	850	Pfam	PF00350	Dynamin family	62	251	8.1e-31	IPR022812	Dynamin superfamily
N_psidii_MA3_02115	482	Pfam	PF01545	Cation efflux family	192	384	3.9e-22	IPR002524	Cation efflux protein
N_psidii_MA3_02116	410	Pfam	PF04479	RTA1 like protein	145	361	2.8e-54	IPR007568	RTA-like protein
N_psidii_MA3_02117	496	Pfam	PF00171	Aldehyde dehydrogenase family	22	485	1.6e-129	IPR015590	Aldehyde dehydrogenase domain
N_psidii_MA3_02118	589	Pfam	PF02776	Thiamine pyrophosphate enzyme, N-terminal TPP binding domain	7	183	7.8e-38	IPR012001	Thiamine pyrophosphate enzyme, N-terminal TPP-binding domain
N_psidii_MA3_02118	589	Pfam	PF02775	Thiamine pyrophosphate enzyme, C-terminal TPP binding domain	425	584	3.4e-16	IPR011766	Thiamine pyrophosphate enzyme, C-terminal TPP-binding
N_psidii_MA3_02119	419	Pfam	PF01070	FMN-dependent dehydrogenase	20	388	2.8e-112	IPR000262	FMN-dependent dehydrogenase
N_psidii_MA3_02120	485	Pfam	PF01494	FAD binding domain	49	228	3.3e-09	IPR002938	FAD-binding domain
N_psidii_MA3_02121	497	Pfam	PF07690	Major Facilitator Superfamily	57	423	3e-37	IPR011701	Major facilitator superfamily
N_psidii_MA3_02122	823	Pfam	PF04082	Fungal specific transcription factor domain	276	456	2.9e-19	IPR007219	Transcription factor domain, fungi
N_psidii_MA3_02123	315	Pfam	PF00561	alpha/beta hydrolase fold	55	160	5.1e-17	IPR000073	Alpha/beta hydrolase fold-1
N_psidii_MA3_02125	313	Pfam	PF05368	NmrA-like family	4	207	1.4e-18	IPR008030	NmrA-like domain
N_psidii_MA3_02127	498	Pfam	PF00171	Aldehyde dehydrogenase family	23	484	7.5e-167	IPR015590	Aldehyde dehydrogenase domain
N_psidii_MA3_02128	607	Pfam	PF01042	Endoribonuclease L-PSP	27	128	7.5e-16	IPR006175	YjgF/YER057c/UK114 family
N_psidii_MA3_02128	607	Pfam	PF01593	Flavin containing amine oxidoreductase	155	595	2.1e-62	IPR002937	Amine oxidase
N_psidii_MA3_02129	422	Pfam	PF08546	Ketopantoate reductase PanE/ApbA C terminal	169	291	1.2e-30	IPR013752	Ketopantoate reductase, C-terminal domain
N_psidii_MA3_02129	422	Pfam	PF02558	Ketopantoate reductase PanE/ApbA	44	134	1.5e-13	IPR013332	Ketopantoate reductase, N-terminal domain
N_psidii_MA3_02130	371	Pfam	PF01070	FMN-dependent dehydrogenase	25	360	2.7e-115	IPR000262	FMN-dependent dehydrogenase
N_psidii_MA3_02132	289	Pfam	PF00596	Class II Aldolase and Adducin N-terminal domain	55	236	1e-48	IPR001303	Class II aldolase/adducin N-terminal
N_psidii_MA3_02133	713	Pfam	PF11951	Fungal specific transcription factor domain	280	711	1e-64	IPR021858	Fungal transcription factor
N_psidii_MA3_02133	713	Pfam	PF00172	Fungal Zn(2)-Cys(6) binuclear cluster domain	19	52	3.4e-10	IPR001138	Zn(2)-C6 fungal-type DNA-binding domain
N_psidii_MA3_02136	546	Pfam	PF13434	L-lysine 6-monooxygenase (NADPH-requiring)	180	432	9.3e-12	IPR025700	L-lysine 6-monooxygenase/L-ornithine 5-monooxygenase
N_psidii_MA3_02139	210	Pfam	PF04148	Transmembrane adaptor Erv26	1	196	1.1e-92	IPR007277	Transmembrane adaptor Erv26
N_psidii_MA3_02140	280	Pfam	PF08241	Methyltransferase domain	52	161	1.5e-11	IPR013216	Methyltransferase type 11
N_psidii_MA3_02140	280	Pfam	PF12589	Methyltransferase involved in Williams-Beuren syndrome	227	277	1.2e-13	IPR022238	18S rRNA (guanine(1575)-N(7))-methyltransferase Bud23-like
N_psidii_MA3_02141	750	Pfam	PF00264	Common central domain of tyrosinase	477	509	5.6e-14	IPR002227	Tyrosinase copper-binding domain
N_psidii_MA3_02145	343	Pfam	PF00106	short chain dehydrogenase	25	174	1.7e-20	IPR002347	Short-chain dehydrogenase/reductase SDR
N_psidii_MA3_02146	270	Pfam	PF02201	SWIB/MDM2 domain	192	264	2.2e-29	IPR003121	SWIB/MDM2 domain
N_psidii_MA3_02146	270	Pfam	PF08766	DEK C terminal domain	9	59	1.5e-15	IPR014876	DEK, C-terminal
N_psidii_MA3_02148	1230	Pfam	PF00069	Protein kinase domain	801	1092	3.8e-40	IPR000719	Protein kinase domain
N_psidii_MA3_02148	1230	Pfam	PF06479	Ribonuclease 2-5A	1098	1225	7.5e-43	IPR010513	KEN domain
N_psidii_MA3_02150	1067	Pfam	PF01565	FAD binding domain	366	510	2.4e-22	IPR006094	FAD linked oxidase, N-terminal
N_psidii_MA3_02150	1067	Pfam	PF08031	Berberine and berberine like	764	807	1.5e-08	IPR012951	Berberine/berberine-like
N_psidii_MA3_02154	746	Pfam	PF08662	Eukaryotic translation initiation factor eIF2A	405	627	3.9e-35	IPR013979	Translation initiation factor, beta propellor-like domain
N_psidii_MA3_02155	547	Pfam	PF00118	TCP-1/cpn60 chaperonin family	52	540	6.6e-141	IPR002423	Chaperonin Cpn60/TCP-1 family
N_psidii_MA3_02157	716	Pfam	PF00566	Rab-GTPase-TBC domain	449	667	2.4e-27	IPR000195	Rab-GTPase-TBC domain
N_psidii_MA3_02160	479	Pfam	PF11960	Domain of unknown function (DUF3474)	76	111	1.8e-08	IPR021863	Fatty acid desaturase, N-terminal
N_psidii_MA3_02160	479	Pfam	PF00487	Fatty acid desaturase	138	423	6e-28	IPR005804	Fatty acid desaturase domain
N_psidii_MA3_02165	929	Pfam	PF03184	DDE superfamily endonuclease	111	154	7.6e-05	IPR004875	DDE superfamily endonuclease domain
N_psidii_MA3_02165	929	Pfam	PF11951	Fungal specific transcription factor domain	549	922	1e-41	IPR021858	Fungal transcription factor
N_psidii_MA3_02165	929	Pfam	PF03221	Tc5 transposase DNA-binding domain	33	87	7.8e-05	IPR006600	HTH CenpB-type DNA-binding domain
N_psidii_MA3_02165	929	Pfam	PF00172	Fungal Zn(2)-Cys(6) binuclear cluster domain	336	366	5e-07	IPR001138	Zn(2)-C6 fungal-type DNA-binding domain
N_psidii_MA3_02166	505	Pfam	PF00464	Serine hydroxymethyltransferase	42	439	1e-201
N_psidii_MA3_02167	210	Pfam	PF00291	Pyridoxal-phosphate dependent enzyme	15	191	2e-34	IPR001926	Pyridoxal-phosphate dependent enzyme
N_psidii_MA3_02168	1006	Pfam	PF14681	Uracil phosphoribosyltransferase	756	945	1.4e-31
N_psidii_MA3_02168	1006	Pfam	PF13207	AAA domain	289	423	1.6e-18
N_psidii_MA3_02168	1006	Pfam	PF12710	haloacid dehalogenase-like hydrolase	496	663	1.6e-14
N_psidii_MA3_02169	774	Pfam	PF00933	Glycosyl hydrolase family 3 N terminal domain	93	340	1.6e-36	IPR001764	Glycoside hydrolase, family 3, N-terminal
N_psidii_MA3_02169	774	Pfam	PF01915	Glycosyl hydrolase family 3 C-terminal domain	386	636	1e-45	IPR002772	Glycoside hydrolase family 3 C-terminal domain
N_psidii_MA3_02169	774	Pfam	PF14310	Fibronectin type III-like domain	693	762	7.9e-21	IPR026891	Fibronectin type III-like domain
N_psidii_MA3_02176	804	Pfam	PF16350	FAD dependent oxidoreductase central domain	378	432	9.1e-18	IPR032503	FAD dependent oxidoreductase, central domain
N_psidii_MA3_02176	804	Pfam	PF08669	Glycine cleavage T-protein C-terminal barrel domain	725	803	6.3e-13	IPR013977	Glycine cleavage T-protein, C-terminal barrel domain
N_psidii_MA3_02176	804	Pfam	PF01266	FAD dependent oxidoreductase	6	374	6.8e-41	IPR006076	FAD dependent oxidoreductase
N_psidii_MA3_02176	804	Pfam	PF01571	Aminomethyltransferase folate-binding domain	434	717	1.5e-67	IPR006222	Aminomethyltransferase, folate-binding domain
N_psidii_MA3_02178	437	Pfam	PF01266	FAD dependent oxidoreductase	8	393	2e-30	IPR006076	FAD dependent oxidoreductase
N_psidii_MA3_02179	413	Pfam	PF00848	Ring hydroxylating alpha subunit (catalytic domain)	189	364	1.1e-22	IPR015879	Aromatic-ring-hydroxylating dioxygenase, alpha subunit, C-terminal domain
N_psidii_MA3_02179	413	Pfam	PF00355	Rieske [2Fe-2S] domain	50	135	1.4e-15	IPR017941	Rieske [2Fe-2S] iron-sulphur domain
N_psidii_MA3_02180	741	Pfam	PF05199	GMC oxidoreductase	441	646	7e-34	IPR007867	Glucose-methanol-choline oxidoreductase, C-terminal
N_psidii_MA3_02180	741	Pfam	PF00732	GMC oxidoreductase	21	324	1.1e-76	IPR000172	Glucose-methanol-choline oxidoreductase, N-terminal
N_psidii_MA3_02181	667	Pfam	PF00501	AMP-binding enzyme	98	537	1e-81	IPR000873	AMP-dependent synthetase/ligase
N_psidii_MA3_02181	667	Pfam	PF13193	AMP-binding enzyme C-terminal domain	547	625	6.3e-24	IPR025110	AMP-binding enzyme, C-terminal domain
N_psidii_MA3_02181	667	Pfam	PF16177	Acetyl-coenzyme A synthetase N-terminus	40	96	2e-17	IPR032387	Acetyl-coenzyme A synthetase, N-terminal domain
N_psidii_MA3_02183	519	Pfam	PF07428	15-O-acetyltransferase Tri3	8	405	8.9e-130	IPR009992	Trichothecene 15-O-acetyltransferase Tri3/Sat16
N_psidii_MA3_02184	194	Pfam	PF03801	HEC/Ndc80p family	92	154	5.1e-10	IPR005550	Kinetochore protein Ndc80
N_psidii_MA3_02186	134	Pfam	PF00436	Single-strand binding protein family	27	117	2.2e-13	IPR000424	Primosome PriB/single-strand DNA-binding
N_psidii_MA3_02188	252	Pfam	PF07691	PA14 domain	212	236	7.4e-05	IPR011658	PA14 domain
N_psidii_MA3_02191	110	Pfam	PF05699	hAT family C-terminal dimerisation region	5	85	8.5e-17	IPR008906	HAT, C-terminal dimerisation domain
N_psidii_MA3_02196	1162	Pfam	PF00620	RhoGAP domain	834	986	3.1e-36	IPR000198	Rho GTPase-activating protein domain
N_psidii_MA3_02196	1162	Pfam	PF00412	LIM domain	155	210	1.2e-11	IPR001781	Zinc finger, LIM-type
N_psidii_MA3_02196	1162	Pfam	PF00412	LIM domain	91	150	3e-09	IPR001781	Zinc finger, LIM-type
N_psidii_MA3_02196	1162	Pfam	PF00412	LIM domain	461	515	1e-06	IPR001781	Zinc finger, LIM-type
N_psidii_MA3_02197	372	Pfam	PF01073	3-beta hydroxysteroid dehydrogenase/isomerase family	15	287	1.5e-68	IPR002225	3-beta hydroxysteroid dehydrogenase/isomerase
N_psidii_MA3_02198	632	Pfam	PF00884	Sulfatase	37	139	1.7e-24	IPR000917	Sulfatase, N-terminal
N_psidii_MA3_02198	632	Pfam	PF10232	Mediator of RNA polymerase II transcription complex subunit 8	372	566	1.1e-37	IPR019364	Mediator complex, subunit Med8, fungi/metazoa
N_psidii_MA3_02198	632	Pfam	PF12411	Choline sulfatase enzyme C terminal	254	287	9e-13	IPR025863	Choline sulfatase enzyme C-terminal domain
N_psidii_MA3_02200	176	Pfam	PF04828	Glutathione-dependent formaldehyde-activating enzyme	23	112	3.5e-16	IPR006913	Glutathione-dependent formaldehyde-activating enzyme/centromere protein V
N_psidii_MA3_02202	302	Pfam	PF01467	Cytidylyltransferase-like	55	111	1e-08	IPR004821	Cytidyltransferase-like domain
N_psidii_MA3_02204	374	Pfam	PF00856	SET domain	210	338	3.5e-08	IPR001214	SET domain
N_psidii_MA3_02205	231	Pfam	PF00646	F-box domain	53	87	6.3e-05	IPR001810	F-box domain
N_psidii_MA3_02208	134	Pfam	PF13578	Methyltransferase domain	7	70	6.5e-06
N_psidii_MA3_02209	204	Pfam	PF03358	NADPH-dependent FMN reductase	16	144	2e-07	IPR005025	NADPH-dependent FMN reductase-like
N_psidii_MA3_02214	616	Pfam	PF00817	impB/mucB/samB family	117	260	2.5e-43	IPR001126	UmuC domain
N_psidii_MA3_02214	616	Pfam	PF11799	impB/mucB/samB family C-terminal domain	347	454	3.5e-14	IPR017961	DNA polymerase, Y-family, little finger domain
N_psidii_MA3_02215	751	Pfam	PF02386	Cation transport protein	290	727	1.9e-101	IPR003445	Cation transporter
N_psidii_MA3_02217	194	Pfam	PF00254	FKBP-type peptidyl-prolyl cis-trans isomerase	34	125	8.1e-34	IPR001179	FKBP-type peptidyl-prolyl cis-trans isomerase domain
N_psidii_MA3_02221	121	Pfam	PF02755	RPEL repeat	31	53	2.1e-09	IPR004018	RPEL repeat
N_psidii_MA3_02221	121	Pfam	PF02755	RPEL repeat	75	98	8.8e-10	IPR004018	RPEL repeat
N_psidii_MA3_02222	1304	Pfam	PF00018	SH3 domain	1168	1213	5.1e-12	IPR001452	SH3 domain
N_psidii_MA3_02222	1304	Pfam	PF06017	Unconventional myosin tail, actin- and lipid-binding	831	1026	1.9e-48	IPR010926	Class I myosin tail homology domain
N_psidii_MA3_02222	1304	Pfam	PF00063	Myosin head (motor domain)	115	773	4e-239	IPR001609	Myosin head, motor domain
N_psidii_MA3_02223	530	Pfam	PF01529	DHHC palmitoyltransferase	162	288	1.4e-28	IPR001594	Palmitoyltransferase, DHHC domain
N_psidii_MA3_02229	611	Pfam	PF01184	GPR1/FUN34/yaaH family	511	593	3.2e-13	IPR000791	Acetate transporter GPR1/FUN34/SatP family
N_psidii_MA3_02229	611	Pfam	PF01184	GPR1/FUN34/yaaH family	379	493	2e-24	IPR000791	Acetate transporter GPR1/FUN34/SatP family
N_psidii_MA3_02230	479	Pfam	PF01474	Class-II DAHP synthetase family	10	473	7.8e-201	IPR002480	DAHP synthetase, class II
N_psidii_MA3_02231	316	Pfam	PF01263	Aldose 1-epimerase	38	309	1.7e-41	IPR008183	Aldose 1-/Glucose-6-phosphate 1-epimerase
N_psidii_MA3_02232	542	Pfam	PF00083	Sugar (and other) transporter	26	472	7.7e-114	IPR005828	Major facilitator, sugar transporter-like
N_psidii_MA3_02235	1021	Pfam	PF12231	Rap1-interacting factor 1 N terminal	155	524	8.6e-146	IPR022031	Telomere-associated protein Rif1, N-terminal
N_psidii_MA3_02236	469	Pfam	PF10165	Guanine nucleotide exchange factor synembryn	40	456	4.5e-136	IPR019318	Guanine nucleotide exchange factor, Ric8
N_psidii_MA3_02237	257	Pfam	PF00385	Chromo (CHRromatin Organisation MOdifier) domain	200	251	1e-16	IPR023780	Chromo domain
N_psidii_MA3_02238	159	Pfam	PF08592	Domain of unknown function (DUF1772)	23	152	4.1e-28	IPR013901	Anthrone oxygenase
N_psidii_MA3_02239	290	Pfam	PF13302	Acetyltransferase (GNAT) domain	147	250	5.8e-21	IPR000182	GNAT domain
N_psidii_MA3_02240	413	Pfam	PF04082	Fungal specific transcription factor domain	8	63	2.8e-05	IPR007219	Transcription factor domain, fungi
N_psidii_MA3_02241	174	Pfam	PF01775	Ribosomal proteins 50S-L18Ae/60S-L20/60S-L18A	4	126	5.3e-55	IPR023573	Ribosomal protein 50S-L18Ae/60S-L20/60S-L18A
N_psidii_MA3_02242	456	Pfam	PF01399	PCI domain	324	447	1.1e-08	IPR000717	Proteasome component (PCI) domain
N_psidii_MA3_02245	380	Pfam	PF12799	Leucine Rich repeats (2 copies)	225	266	6.2e-09	IPR025875	Leucine rich repeat 4
N_psidii_MA3_02245	380	Pfam	PF12799	Leucine Rich repeats (2 copies)	269	309	6.3e-07	IPR025875	Leucine rich repeat 4
N_psidii_MA3_02245	380	Pfam	PF13855	Leucine rich repeat	159	215	2.1e-07	IPR001611	Leucine-rich repeat
N_psidii_MA3_02246	323	Pfam	PF00248	Aldo/keto reductase family	17	301	3.1e-44	IPR023210	NADP-dependent oxidoreductase domain
N_psidii_MA3_02251	832	Pfam	PF00005	ABC transporter	548	693	1.8e-16	IPR003439	ABC transporter-like
N_psidii_MA3_02251	832	Pfam	PF06472	ABC transporter transmembrane region 2	141	422	4.5e-98	IPR011527	ABC transporter type 1, transmembrane domain
N_psidii_MA3_02252	501	Pfam	PF03031	NLI interacting factor-like phosphatase	332	493	2.2e-54	IPR004274	FCP1 homology domain
N_psidii_MA3_02254	113	Pfam	PF03911	Sec61beta family	65	105	2.2e-18	IPR016482	Protein transport protein SecG/Sec61-beta/Sbh
N_psidii_MA3_02255	1356	Pfam	PF02809	Ubiquitin interaction motif	1034	1049	4.8	IPR003903	Ubiquitin interacting motif
N_psidii_MA3_02255	1356	Pfam	PF02809	Ubiquitin interaction motif	1254	1267	0.2	IPR003903	Ubiquitin interacting motif
N_psidii_MA3_02255	1356	Pfam	PF02809	Ubiquitin interaction motif	1057	1068	59	IPR003903	Ubiquitin interacting motif
N_psidii_MA3_02255	1356	Pfam	PF02809	Ubiquitin interaction motif	1177	1189	0.61	IPR003903	Ubiquitin interacting motif
N_psidii_MA3_02255	1356	Pfam	PF02809	Ubiquitin interaction motif	1197	1211	0.036	IPR003903	Ubiquitin interacting motif
N_psidii_MA3_02255	1356	Pfam	PF03033	Glycosyltransferase family 28 N-terminal domain	124	187	6e-11	IPR004276	Glycosyltransferase family 28, N-terminal domain
N_psidii_MA3_02257	318	Pfam	PF01876	RNase P subunit p30	3	227	3e-58	IPR002738	RNase P subunit p30
N_psidii_MA3_02264	609	Pfam	PF00012	Hsp70 protein	149	412	5.7e-13	IPR013126	Heat shock protein 70 family
N_psidii_MA3_02269	896	Pfam	PF00172	Fungal Zn(2)-Cys(6) binuclear cluster domain	26	64	1.2e-05	IPR001138	Zn(2)-C6 fungal-type DNA-binding domain
N_psidii_MA3_02269	896	Pfam	PF04082	Fungal specific transcription factor domain	238	445	2e-11	IPR007219	Transcription factor domain, fungi
N_psidii_MA3_02272	314	Pfam	PF09792	Ubiquitin 3 binding protein But2 C-terminal domain	164	304	1.8e-57	IPR018620	Ubiquitin 3 binding protein But2, C-terminal
N_psidii_MA3_02273	614	Pfam	PF08153	NGP1NT (NUC091) domain	43	177	4.6e-52	IPR012971	Nucleolar GTP-binding protein 2, N-terminal domain
N_psidii_MA3_02273	614	Pfam	PF01926	50S ribosome-binding GTPase	324	378	1.5e-12	IPR006073	GTP binding domain
N_psidii_MA3_02275	1081	Pfam	PF00005	ABC transporter	385	538	7.5e-24	IPR003439	ABC transporter-like
N_psidii_MA3_02275	1081	Pfam	PF01061	ABC-2 type transporter	808	1018	3.3e-37	IPR013525	ABC-2 type transporter
N_psidii_MA3_02277	397	Pfam	PF00155	Aminotransferase class I and II	58	388	2.2e-40	IPR004839	Aminotransferase, class I/classII
N_psidii_MA3_02279	490	Pfam	PF00026	Eukaryotic aspartyl protease	58	401	9.2e-60	IPR033121	Peptidase family A1 domain
N_psidii_MA3_02280	740	Pfam	PF14492	Elongation Factor G, domain II	443	516	3.4e-31
N_psidii_MA3_02280	740	Pfam	PF00009	Elongation factor Tu GTP binding domain	40	322	5e-59	IPR000795	Transcription factor, GTP-binding domain
N_psidii_MA3_02280	740	Pfam	PF00679	Elongation factor G C-terminus	640	725	3.5e-23	IPR000640	Elongation factor EFG, domain V-like
N_psidii_MA3_02280	740	Pfam	PF03764	Elongation factor G, domain IV	518	636	1e-30	IPR005517	Translation elongation factor EFG/EF2, domain IV
N_psidii_MA3_02280	740	Pfam	PF03144	Elongation factor Tu domain 2	364	430	5.8e-13	IPR004161	Translation elongation factor EFTu-like, domain 2
N_psidii_MA3_02281	356	Pfam	PF00180	Isocitrate/isopropylmalate dehydrogenase	8	351	1.3e-98	IPR024084	Isopropylmalate dehydrogenase-like domain
N_psidii_MA3_02284	166	Pfam	PF00410	Ribosomal protein S8	6	165	2e-10	IPR000630	Ribosomal protein S8
N_psidii_MA3_02285	522	Pfam	PF01494	FAD binding domain	7	372	2.4e-15	IPR002938	FAD-binding domain
N_psidii_MA3_02286	385	Pfam	PF00557	Metallopeptidase family M24	122	352	8.7e-51	IPR000994	Peptidase M24
N_psidii_MA3_02286	385	Pfam	PF15801	zf-MYND-like zinc finger, mRNA-binding	11	56	2.4e-21	IPR031615	MYND-like zinc finger, mRNA-binding
N_psidii_MA3_02287	139	Pfam	PF03311	Cornichon protein	6	127	3.6e-50	IPR003377	Cornichon
N_psidii_MA3_02290	313	Pfam	PF13561	Enoyl-(Acyl carrier protein) reductase	64	309	3.8e-52
N_psidii_MA3_02295	598	Pfam	PF01490	Transmembrane amino acid transporter protein	206	592	2.1e-76	IPR013057	Amino acid transporter, transmembrane domain
N_psidii_MA3_02296	939	Pfam	PF06766	Fungal hydrophobin	707	771	4.2e-25	IPR010636	Cerato-ulmin hydrophobin family
N_psidii_MA3_02298	702	Pfam	PF00615	Regulator of G protein signaling domain	381	529	1.9e-06	IPR016137	RGS domain
N_psidii_MA3_02299	477	Pfam	PF13637	Ankyrin repeats (many copies)	152	205	2.6e-06
N_psidii_MA3_02301	585	Pfam	PF00128	Alpha amylase, catalytic domain	41	402	7.3e-110	IPR006047	Glycosyl hydrolase, family 13, catalytic domain
N_psidii_MA3_02303	202	Pfam	PF00083	Sugar (and other) transporter	83	193	1.6e-15	IPR005828	Major facilitator, sugar transporter-like
N_psidii_MA3_02304	347	Pfam	PF00083	Sugar (and other) transporter	1	312	2.9e-57	IPR005828	Major facilitator, sugar transporter-like
N_psidii_MA3_02310	1061	Pfam	PF03439	Early transcription elongation factor of RNA pol II, NGN section	219	308	1.5e-24	IPR005100	Transcription elongation factor Spt5, NGN domain
N_psidii_MA3_02310	1061	Pfam	PF11942	Spt5 transcription elongation factor, acidic N-terminal	118	213	1e-22	IPR022581	Spt5 transcription elongation factor, N-terminal
N_psidii_MA3_02310	1061	Pfam	PF12815	Spt5 C-terminal nonapeptide repeat binding Spt4	854	937	1.6e-18
N_psidii_MA3_02311	659	Pfam	PF00400	WD domain, G-beta repeat	554	592	7e-06	IPR001680	WD40 repeat
N_psidii_MA3_02313	89	Pfam	PF08520	Fungal protein of unknown function (DUF1748)	15	87	8.8e-32	IPR013726	Protein of unknown function DUF1748, fungi
N_psidii_MA3_02315	543	Pfam	PF02887	Pyruvate kinase, alpha/beta domain	409	531	1.3e-37	IPR015795	Pyruvate kinase, C-terminal
N_psidii_MA3_02315	543	Pfam	PF00224	Pyruvate kinase, barrel domain	48	393	4.1e-171	IPR015793	Pyruvate kinase, barrel
N_psidii_MA3_02316	323	Pfam	PF03443	Glycosyl hydrolase family 61	17	233	5.1e-55	IPR005103	Glycoside hydrolase, family 61
N_psidii_MA3_02318	568	Pfam	PF07690	Major Facilitator Superfamily	126	519	7.6e-47	IPR011701	Major facilitator superfamily
N_psidii_MA3_02319	422	Pfam	PF00144	Beta-lactamase	1	251	3.8e-15	IPR001466	Beta-lactamase-related
N_psidii_MA3_02321	740	Pfam	PF00069	Protein kinase domain	154	467	4.7e-42	IPR000719	Protein kinase domain
N_psidii_MA3_02322	632	Pfam	PF06516	Purine nucleoside permease (NUP)	171	493	2.1e-132	IPR009486	Purine nucleoside permease
N_psidii_MA3_02323	1269	Pfam	PF08282	haloacid dehalogenase-like hydrolase	799	860	9.5e-05
N_psidii_MA3_02323	1269	Pfam	PF13246	Cation transport ATPase (P-type)	549	639	1.2e-21
N_psidii_MA3_02323	1269	Pfam	PF00122	E1-E2 ATPase	254	457	5.2e-36
N_psidii_MA3_02323	1269	Pfam	PF00690	Cation transporter/ATPase, N-terminus	155	197	6.6e-07	IPR004014	Cation-transporting P-type ATPase, N-terminal
N_psidii_MA3_02323	1269	Pfam	PF00689	Cation transporting ATPase, C-terminus	897	1072	1e-42	IPR006068	Cation-transporting P-type ATPase, C-terminal
N_psidii_MA3_02324	1986	Pfam	PF00664	ABC transporter transmembrane region	833	1102	1e-48	IPR011527	ABC transporter type 1, transmembrane domain
N_psidii_MA3_02324	1986	Pfam	PF00664	ABC transporter transmembrane region	53	325	3.8e-42	IPR011527	ABC transporter type 1, transmembrane domain
N_psidii_MA3_02324	1986	Pfam	PF00005	ABC transporter	398	550	9.3e-30	IPR003439	ABC transporter-like
N_psidii_MA3_02324	1986	Pfam	PF00005	ABC transporter	1172	1331	6.6e-29	IPR003439	ABC transporter-like
N_psidii_MA3_02327	314	Pfam	PF00106	short chain dehydrogenase	26	220	9.8e-48	IPR002347	Short-chain dehydrogenase/reductase SDR
N_psidii_MA3_02328	842	Pfam	PF00096	Zinc finger, C2H2 type	15	37	0.00059
N_psidii_MA3_02328	842	Pfam	PF04082	Fungal specific transcription factor domain	365	602	2.2e-17	IPR007219	Transcription factor domain, fungi
N_psidii_MA3_02329	449	Pfam	PF00891	O-methyltransferase	255	368	1.1e-07	IPR001077	O-methyltransferase, family 2
N_psidii_MA3_02330	487	Pfam	PF04209	homogentisate 1,2-dioxygenase	38	465	1.3e-165	IPR005708	Homogentisate 1,2-dioxygenase
N_psidii_MA3_02335	654	Pfam	PF07732	Multicopper oxidase	85	196	1.1e-21	IPR011707	Multicopper oxidase, type 3
N_psidii_MA3_02335	654	Pfam	PF00394	Multicopper oxidase	235	395	6.3e-15	IPR001117	Multicopper oxidase, type 1
N_psidii_MA3_02336	589	Pfam	PF07731	Multicopper oxidase	448	560	1.2e-14	IPR011706	Multicopper oxidase, type 2
N_psidii_MA3_02336	589	Pfam	PF00394	Multicopper oxidase	173	349	5.4e-18	IPR001117	Multicopper oxidase, type 1
N_psidii_MA3_02336	589	Pfam	PF07732	Multicopper oxidase	32	142	5.3e-37	IPR011707	Multicopper oxidase, type 3
N_psidii_MA3_02338	1008	Pfam	PF14529	Endonuclease-reverse transcriptase	509	612	2.6e-16	IPR005135	Endonuclease/exonuclease/phosphatase
N_psidii_MA3_02339	971	Pfam	PF03702	Anhydro-N-acetylmuramic acid kinase	565	954	1.7e-72	IPR005338	Anhydro-N-acetylmuramic acid kinase
N_psidii_MA3_02339	971	Pfam	PF00923	Transaldolase/Fructose-6-phosphate aldolase	19	315	2.3e-67	IPR001585	Transaldolase/Fructose-6-phosphate aldolase
N_psidii_MA3_02341	558	Pfam	PF00083	Sugar (and other) transporter	20	472	3.8e-79	IPR005828	Major facilitator, sugar transporter-like
N_psidii_MA3_02343	388	Pfam	PF00078	Reverse transcriptase (RNA-dependent DNA polymerase)	285	370	2.7e-09	IPR000477	Reverse transcriptase domain
N_psidii_MA3_02351	490	Pfam	PF00266	Aminotransferase class-V	183	469	2.4e-19	IPR000192	Aminotransferase class V domain
N_psidii_MA3_02351	490	Pfam	PF00266	Aminotransferase class-V	73	167	2.1e-08	IPR000192	Aminotransferase class V domain
N_psidii_MA3_02369	520	Pfam	PF00083	Sugar (and other) transporter	6	349	1.1e-60	IPR005828	Major facilitator, sugar transporter-like
N_psidii_MA3_02370	333	Pfam	PF00098	Zinc knuckle	278	292	1.1e-05	IPR001878	Zinc finger, CCHC-type
N_psidii_MA3_02373	127	Pfam	PF01248	Ribosomal protein L7Ae/L30e/S12e/Gadd45 family	20	110	3.6e-22	IPR004038	Ribosomal protein L7Ae/L30e/S12e/Gadd45
N_psidii_MA3_02380	523	Pfam	PF13857	Ankyrin repeats (many copies)	444	477	1.8e-06
N_psidii_MA3_02380	523	Pfam	PF12796	Ankyrin repeats (3 copies)	243	316	2.2e-09	IPR020683	Ankyrin repeat-containing domain
N_psidii_MA3_02380	523	Pfam	PF12796	Ankyrin repeats (3 copies)	327	417	1.7e-13	IPR020683	Ankyrin repeat-containing domain
N_psidii_MA3_02380	523	Pfam	PF12796	Ankyrin repeats (3 copies)	88	177	1.7e-16	IPR020683	Ankyrin repeat-containing domain
N_psidii_MA3_02385	566	Pfam	PF01408	Oxidoreductase family, NAD-binding Rossmann fold	184	291	5.8e-20	IPR000683	Oxidoreductase, N-terminal
N_psidii_MA3_02412	274	Pfam	PF08547	Complex I intermediate-associated protein 30 (CIA30)	44	241	9.4e-45	IPR013857	NADH:ubiquinone oxidoreductase intermediate-associated protein 30
N_psidii_MA3_02413	311	Pfam	PF04280	Tim44-like domain	142	277	6.9e-10	IPR007379	Tim44-like domain
N_psidii_MA3_02415	431	Pfam	PF00474	Sodium:solute symporter family	19	310	4.7e-06	IPR001734	Sodium/solute symporter
N_psidii_MA3_02416	795	Pfam	PF04082	Fungal specific transcription factor domain	282	563	2.5e-29	IPR007219	Transcription factor domain, fungi
N_psidii_MA3_02416	795	Pfam	PF00172	Fungal Zn(2)-Cys(6) binuclear cluster domain	22	56	3.7e-08	IPR001138	Zn(2)-C6 fungal-type DNA-binding domain
N_psidii_MA3_02418	329	Pfam	PF12697	Alpha/beta hydrolase family	49	174	3.1e-06	IPR000073	Alpha/beta hydrolase fold-1
N_psidii_MA3_02420	769	Pfam	PF13472	GDSL-like Lipase/Acylhydrolase family	458	632	1e-10	IPR013830	SGNH hydrolase-type esterase domain
N_psidii_MA3_02421	174	Pfam	PF00067	Cytochrome P450	2	128	7.9e-17	IPR001128	Cytochrome P450
N_psidii_MA3_02422	388	Pfam	PF00067	Cytochrome P450	65	384	3.2e-26	IPR001128	Cytochrome P450
N_psidii_MA3_02423	314	Pfam	PF01501	Glycosyl transferase family 8	20	281	8.5e-11	IPR002495	Glycosyl transferase, family 8
N_psidii_MA3_02427	476	Pfam	PF02775	Thiamine pyrophosphate enzyme, C-terminal TPP binding domain	316	395	4.9e-12	IPR011766	Thiamine pyrophosphate enzyme, C-terminal TPP-binding
N_psidii_MA3_02427	476	Pfam	PF02776	Thiamine pyrophosphate enzyme, N-terminal TPP binding domain	4	176	1.8e-30	IPR012001	Thiamine pyrophosphate enzyme, N-terminal TPP-binding domain
N_psidii_MA3_02430	285	Pfam	PF01738	Dienelactone hydrolase family	26	284	5.5e-21	IPR002925	Dienelactone hydrolase
N_psidii_MA3_02434	585	Pfam	PF00082	Subtilase family	160	550	2.7e-46	IPR000209	Peptidase S8/S53 domain
N_psidii_MA3_02435	1166	Pfam	PF06280	Fn3-like domain	39	154	8.5e-08	IPR010435	Fn3-like domain
N_psidii_MA3_02438	440	Pfam	PF07470	Glycosyl Hydrolase Family 88	78	435	2.7e-63	IPR010905	Glycosyl hydrolase, family 88
N_psidii_MA3_02439	219	Pfam	PF13639	Ring finger domain	109	152	9.5e-14	IPR001841	Zinc finger, RING-type
N_psidii_MA3_02440	555	Pfam	PF00067	Cytochrome P450	117	538	2.6e-74	IPR001128	Cytochrome P450
N_psidii_MA3_02441	1467	Pfam	PF03104	DNA polymerase family B, exonuclease domain	648	815	1.7e-14	IPR006133	DNA-directed DNA polymerase, family B, exonuclease domain
N_psidii_MA3_02441	1467	Pfam	PF14260	C4-type zinc-finger of DNA polymerase delta	1369	1442	7.7e-14	IPR025687	C4-type zinc-finger of DNA polymerase delta
N_psidii_MA3_02441	1467	Pfam	PF00136	DNA polymerase family B	875	1328	1.6e-105	IPR006134	DNA-directed DNA polymerase, family B, multifunctional domain
N_psidii_MA3_02445	485	Pfam	PF11708	Pre-mRNA splicing Prp18-interacting factor	115	359	5.7e-75	IPR021715	Pre-mRNA splicing Prp18-interacting factor
N_psidii_MA3_02446	190	Pfam	PF01479	S4 domain	105	148	2.9e-12	IPR002942	RNA-binding S4 domain
N_psidii_MA3_02446	190	Pfam	PF00163	Ribosomal protein S4/S9 N-terminal domain	13	60	4.8e-05	IPR001912	Ribosomal protein S4/S9, N-terminal
N_psidii_MA3_02447	160	Pfam	PF01157	Ribosomal protein L21e	3	99	2.1e-47	IPR001147	Ribosomal protein L21e
N_psidii_MA3_02453	556	Pfam	PF00324	Amino acid permease	57	513	1.7e-64	IPR004841	Amino acid permease/ SLC12A domain
N_psidii_MA3_02454	563	Pfam	PF02133	Permease for cytosine/purines, uracil, thiamine, allantoin	46	489	5.4e-95	IPR001248	Purine-cytosine permease
N_psidii_MA3_02455	780	Pfam	PF00141	Peroxidase	108	434	3e-45	IPR002016	Haem peroxidase, plant/fungal/bacterial
N_psidii_MA3_02455	780	Pfam	PF00141	Peroxidase	442	749	1.8e-37	IPR002016	Haem peroxidase, plant/fungal/bacterial
N_psidii_MA3_02456	314	Pfam	PF01612	3'-5' exonuclease	31	206	1.2e-11	IPR002562	3'-5' exonuclease domain
N_psidii_MA3_02458	498	Pfam	PF01728	FtsJ-like methyltransferase	241	422	3.9e-12	IPR002877	Ribosomal RNA methyltransferase FtsJ domain
N_psidii_MA3_02460	264	Pfam	PF00775	Dioxygenase	35	95	3.8e-07	IPR000627	Intradiol ring-cleavage dioxygenase, C-terminal
N_psidii_MA3_02461	369	Pfam	PF08240	Alcohol dehydrogenase GroES-like domain	40	154	2.9e-22	IPR013154	Alcohol dehydrogenase, N-terminal
N_psidii_MA3_02461	369	Pfam	PF00107	Zinc-binding dehydrogenase	199	327	1.1e-26	IPR013149	Alcohol dehydrogenase, C-terminal
N_psidii_MA3_02463	553	Pfam	PF00172	Fungal Zn(2)-Cys(6) binuclear cluster domain	4	38	8.3e-07	IPR001138	Zn(2)-C6 fungal-type DNA-binding domain
N_psidii_MA3_02465	259	Pfam	PF01828	Peptidase A4 family	61	256	1.4e-72	IPR000250	Peptidase G1
N_psidii_MA3_02471	1917	Pfam	PF02364	1,3-beta-glucan synthase component	836	1659	0	IPR003440	Glycosyl transferase, family 48
N_psidii_MA3_02471	1917	Pfam	PF14288	1,3-beta-glucan synthase subunit FKS1, domain-1	330	436	1.7e-35	IPR026899	1,3-beta-glucan synthase subunit FKS1-like, domain-1
N_psidii_MA3_02473	252	Pfam	PF13489	Methyltransferase domain	36	137	3e-12
N_psidii_MA3_02480	499	Pfam	PF07690	Major Facilitator Superfamily	50	418	2.3e-29	IPR011701	Major facilitator superfamily
N_psidii_MA3_02481	309	Pfam	PF03328	HpcH/HpaI aldolase/citrate lyase family	42	259	6.2e-38	IPR005000	HpcH/HpaI aldolase/citrate lyase domain
N_psidii_MA3_02482	524	Pfam	PF00155	Aminotransferase class I and II	104	514	4.9e-12	IPR004839	Aminotransferase, class I/classII
N_psidii_MA3_02483	542	Pfam	PF00135	Carboxylesterase family	16	508	5.4e-77	IPR002018	Carboxylesterase, type B
N_psidii_MA3_02484	556	Pfam	PF00069	Protein kinase domain	95	479	1.6e-23	IPR000719	Protein kinase domain
N_psidii_MA3_02486	556	Pfam	PF01565	FAD binding domain	72	206	6e-24	IPR006094	FAD linked oxidase, N-terminal
N_psidii_MA3_02492	530	Pfam	PF07690	Major Facilitator Superfamily	27	455	1.3e-27	IPR011701	Major facilitator superfamily
N_psidii_MA3_02493	302	Pfam	PF12326	N-glycosylation protein	150	230	1e-14	IPR021100	N-glycosylation protein EOS1
N_psidii_MA3_02494	270	Pfam	PF01253	Translation initiation factor SUI1	182	254	3.9e-27	IPR001950	SUI1 domain
N_psidii_MA3_02496	498	Pfam	PF07757	Predicted AdoMet-dependent methyltransferase	224	323	2.2e-39	IPR011671	tRNA (uracil-O(2)-)-methyltransferase
N_psidii_MA3_02498	483	Pfam	PF01565	FAD binding domain	49	184	4e-27	IPR006094	FAD linked oxidase, N-terminal
N_psidii_MA3_02501	384	Pfam	PF13816	Haem-containing dehydratase	15	323	9.5e-85	IPR025702	Haem-containing dehydratase
N_psidii_MA3_02503	563	Pfam	PF04082	Fungal specific transcription factor domain	75	223	4.5e-11	IPR007219	Transcription factor domain, fungi
N_psidii_MA3_02504	488	Pfam	PF00083	Sugar (and other) transporter	10	458	5.4e-81	IPR005828	Major facilitator, sugar transporter-like
N_psidii_MA3_02507	447	Pfam	PF00891	O-methyltransferase	270	421	4.3e-22	IPR001077	O-methyltransferase, family 2
N_psidii_MA3_02510	350	Pfam	PF00795	Carbon-nitrogen hydrolase	28	307	3.6e-45	IPR003010	Carbon-nitrogen hydrolase
N_psidii_MA3_02512	163	Pfam	PF00984	UDP-glucose/GDP-mannose dehydrogenase family, central domain	73	143	1.6e-18	IPR014026	UDP-glucose/GDP-mannose dehydrogenase, dimerisation
N_psidii_MA3_02514	553	Pfam	PF00722	Glycosyl hydrolases family 16	430	545	7.2e-06	IPR000757	Glycoside hydrolase family 16
N_psidii_MA3_02515	249	Pfam	PF00122	E1-E2 ATPase	147	245	4.3e-16
N_psidii_MA3_02516	515	Pfam	PF03641	Possible lysine decarboxylase	314	462	5.6e-25	IPR031100	LOG family
N_psidii_MA3_02516	515	Pfam	PF01745	Isopentenyl transferase	10	159	9.1e-13	IPR002648	Adenylate dimethylallyltransferase
N_psidii_MA3_02520	566	Pfam	PF00732	GMC oxidoreductase	6	302	6.9e-57	IPR000172	Glucose-methanol-choline oxidoreductase, N-terminal
N_psidii_MA3_02520	566	Pfam	PF05199	GMC oxidoreductase	418	552	1.7e-31	IPR007867	Glucose-methanol-choline oxidoreductase, C-terminal
N_psidii_MA3_02522	288	Pfam	PF00722	Glycosyl hydrolases family 16	66	282	6.2e-15	IPR000757	Glycoside hydrolase family 16
N_psidii_MA3_02524	770	Pfam	PF06985	Heterokaryon incompatibility protein (HET)	285	442	1.5e-27	IPR010730	Heterokaryon incompatibility
N_psidii_MA3_02530	763	Pfam	PF13637	Ankyrin repeats (many copies)	122	172	2.5e-07
N_psidii_MA3_02531	201	Pfam	PF13639	Ring finger domain	120	163	3e-14	IPR001841	Zinc finger, RING-type
N_psidii_MA3_02532	771	Pfam	PF02705	K+ potassium transporter	85	665	2.2e-184	IPR003855	Potassium transporter
N_psidii_MA3_02534	530	Pfam	PF13520	Amino acid permease	56	496	1.4e-43	IPR002293	Amino acid/polyamine transporter I
N_psidii_MA3_02535	338	Pfam	PF12311	Protein of unknown function (DUF3632)	128	307	4e-35	IPR022085	Protein of unknown function DUF3632
N_psidii_MA3_02540	523	Pfam	PF00069	Protein kinase domain	21	229	1.8e-57	IPR000719	Protein kinase domain
N_psidii_MA3_02541	576	Pfam	PF08601	Transcription factor PAP1	241	391	5.3e-19	IPR013910	Transcription factor PAP1
N_psidii_MA3_02541	576	Pfam	PF08601	Transcription factor PAP1	402	546	1.3e-58	IPR013910	Transcription factor PAP1
N_psidii_MA3_02541	576	Pfam	PF00170	bZIP transcription factor	161	215	5.4e-09	IPR004827	Basic-leucine zipper domain
N_psidii_MA3_02543	71	Pfam	PF11034	Glucose-repressible protein Grg1	1	67	1.8e-30	IPR020100	Glucose-repressible protein Grg1
N_psidii_MA3_02544	450	Pfam	PF03909	BSD domain	239	295	2.3e-19	IPR005607	BSD domain
N_psidii_MA3_02545	211	Pfam	PF10273	Pre-rRNA-processing protein TSR2	19	112	7.4e-34	IPR019398	Pre-rRNA-processing protein TSR2
N_psidii_MA3_02546	847	Pfam	PF07859	alpha/beta hydrolase fold	365	417	8.5e-07	IPR013094	Alpha/beta hydrolase fold-3
N_psidii_MA3_02546	847	Pfam	PF07859	alpha/beta hydrolase fold	149	262	1.5e-29	IPR013094	Alpha/beta hydrolase fold-3
N_psidii_MA3_02547	104	Pfam	PF09809	Mitochondrial ribosomal protein L27	13	74	3.7e-17	IPR019189	Ribosomal protein L27/L41, mitochondrial
N_psidii_MA3_02549	1227	Pfam	PF11817	Foie gras liver health family 1	339	607	6.2e-83	IPR021773	Foie gras liver health family 1
N_psidii_MA3_02549	1227	Pfam	PF07919	Gryzun, putative trafficking through Golgi	635	1211	1e-237	IPR012880	Gryzun, putative trafficking through Golgi
N_psidii_MA3_02550	592	Pfam	PF07690	Major Facilitator Superfamily	86	489	6.2e-37	IPR011701	Major facilitator superfamily
N_psidii_MA3_02552	432	Pfam	PF12697	Alpha/beta hydrolase family	81	376	3.5e-08	IPR000073	Alpha/beta hydrolase fold-1
N_psidii_MA3_02553	1051	Pfam	PF16486	N-terminal domain of argonaute	139	316	7.8e-10	IPR032474	Protein argonaute, N-terminal
N_psidii_MA3_02553	1051	Pfam	PF02171	Piwi domain	705	1013	1.2e-70	IPR003165	Piwi domain
N_psidii_MA3_02553	1051	Pfam	PF08699	Argonaute linker 1 domain	336	385	3.3e-12	IPR014811	Argonaute, linker 1 domain
N_psidii_MA3_02553	1051	Pfam	PF16488	Argonaute linker 2 domain	560	600	6.7e-09	IPR032472	Argonaute linker 2 domain
N_psidii_MA3_02553	1051	Pfam	PF02170	PAZ domain	477	545	8.5e-10	IPR003100	PAZ domain
N_psidii_MA3_02555	167	Pfam	PF00383	Cytidine and deoxycytidylate deaminase zinc-binding region	9	119	3.4e-11	IPR002125	Cytidine and deoxycytidylate deaminase domain
N_psidii_MA3_02556	295	Pfam	PF00226	DnaJ domain	16	80	1.4e-21	IPR001623	DnaJ domain
N_psidii_MA3_02557	260	Pfam	PF10451	Telomere regulation protein Stn1	46	89	1.2e-07	IPR018856	CST complex subunit Stn1, N-terminal
N_psidii_MA3_02557	260	Pfam	PF10451	Telomere regulation protein Stn1	129	202	1.3e-05	IPR018856	CST complex subunit Stn1, N-terminal
N_psidii_MA3_02558	717	Pfam	PF03639	Glycosyl hydrolase family 81	26	709	1.3e-281	IPR005200	Endo-1,3(4)-beta-glucanase
N_psidii_MA3_02559	472	Pfam	PF01699	Sodium/calcium exchanger protein	313	454	1.1e-24	IPR004837	Sodium/calcium exchanger membrane region
N_psidii_MA3_02559	472	Pfam	PF01699	Sodium/calcium exchanger protein	118	282	1.1e-21	IPR004837	Sodium/calcium exchanger membrane region
N_psidii_MA3_02560	620	Pfam	PF04615	Utp14 protein	1	618	1.6e-184	IPR006709	Small-subunit processome, Utp14
N_psidii_MA3_02561	469	Pfam	PF02628	Cytochrome oxidase assembly protein	86	439	1.5e-109	IPR003780	COX15/CtaA family
N_psidii_MA3_02562	612	Pfam	PF00152	tRNA synthetases class II (D, K and N)	235	582	1.9e-76	IPR004364	Aminoacyl-tRNA synthetase, class II (D/K/N)
N_psidii_MA3_02562	612	Pfam	PF01336	OB-fold nucleic acid binding domain	129	217	3.7e-11	IPR004365	OB-fold nucleic acid binding domain, AA-tRNA synthetase-type
N_psidii_MA3_02565	253	Pfam	PF00385	Chromo (CHRromatin Organisation MOdifier) domain	70	122	1.2e-11	IPR023780	Chromo domain
N_psidii_MA3_02565	253	Pfam	PF01393	Chromo shadow domain	183	238	3.4e-18	IPR008251	Chromo shadow domain
N_psidii_MA3_02567	996	Pfam	PF13641	Glycosyltransferase like family 2	578	787	6.9e-08
N_psidii_MA3_02570	425	Pfam	PF01370	NAD dependent epimerase/dehydratase family	59	350	4.5e-41	IPR001509	NAD-dependent epimerase/dehydratase
N_psidii_MA3_02572	681	Pfam	PF00400	WD domain, G-beta repeat	215	253	1.1e-07	IPR001680	WD40 repeat
N_psidii_MA3_02572	681	Pfam	PF00400	WD domain, G-beta repeat	302	338	7.3e-09	IPR001680	WD40 repeat
N_psidii_MA3_02572	681	Pfam	PF00400	WD domain, G-beta repeat	385	422	3e-05	IPR001680	WD40 repeat
N_psidii_MA3_02572	681	Pfam	PF00400	WD domain, G-beta repeat	47	84	4.2e-05	IPR001680	WD40 repeat
N_psidii_MA3_02572	681	Pfam	PF00400	WD domain, G-beta repeat	89	126	0.00028	IPR001680	WD40 repeat
N_psidii_MA3_02572	681	Pfam	PF00400	WD domain, G-beta repeat	473	510	0.0031	IPR001680	WD40 repeat
N_psidii_MA3_02572	681	Pfam	PF00400	WD domain, G-beta repeat	173	210	6.4e-08	IPR001680	WD40 repeat
N_psidii_MA3_02572	681	Pfam	PF00400	WD domain, G-beta repeat	515	552	1.7e-05	IPR001680	WD40 repeat
N_psidii_MA3_02572	681	Pfam	PF00400	WD domain, G-beta repeat	269	296	4e-05	IPR001680	WD40 repeat
N_psidii_MA3_02572	681	Pfam	PF00400	WD domain, G-beta repeat	349	381	2.8e-06	IPR001680	WD40 repeat
N_psidii_MA3_02572	681	Pfam	PF00400	WD domain, G-beta repeat	131	169	3.5e-10	IPR001680	WD40 repeat
N_psidii_MA3_02577	395	Pfam	PF06999	Sucrase/ferredoxin-like	109	384	1.5e-70	IPR009737	Thioredoxin-like ferredoxin
N_psidii_MA3_02578	768	Pfam	PF01553	Acyltransferase	240	299	3.6e-05	IPR002123	Phospholipid/glycerol acyltransferase
N_psidii_MA3_02579	371	Pfam	PF13639	Ring finger domain	26	66	2.4e-09	IPR001841	Zinc finger, RING-type
N_psidii_MA3_02579	371	Pfam	PF02148	Zn-finger in ubiquitin-hydrolases and other protein	94	152	1.7e-18	IPR001607	Zinc finger, UBP-type
N_psidii_MA3_02580	341	Pfam	PF07576	BRCA1-associated protein 2	242	316	5.4e-22	IPR011422	BRCA1-associated 2
N_psidii_MA3_02581	440	Pfam	PF00240	Ubiquitin family	138	209	5.6e-33	IPR000626	Ubiquitin domain
N_psidii_MA3_02581	440	Pfam	PF00240	Ubiquitin family	366	437	5.6e-33	IPR000626	Ubiquitin domain
N_psidii_MA3_02581	440	Pfam	PF00240	Ubiquitin family	290	361	5.6e-33	IPR000626	Ubiquitin domain
N_psidii_MA3_02581	440	Pfam	PF00240	Ubiquitin family	214	285	5.6e-33	IPR000626	Ubiquitin domain
N_psidii_MA3_02586	199	Pfam	PF00071	Ras family	10	182	1.1e-54	IPR001806	Small GTPase superfamily
N_psidii_MA3_02587	348	Pfam	PF07859	alpha/beta hydrolase fold	82	314	3.6e-23	IPR013094	Alpha/beta hydrolase fold-3
N_psidii_MA3_02588	481	Pfam	PF15511	Centromere kinetochore component CENP-T histone fold	405	481	2.3e-27	IPR035425	CENP-T/Histone H4, histone fold
N_psidii_MA3_02589	316	Pfam	PF02104	SURF1 family	81	289	5.2e-47	IPR002994	Surfeit locus 1/Shy1
N_psidii_MA3_02593	462	Pfam	PF00789	UBX domain	281	361	4.8e-14	IPR001012	UBX domain
N_psidii_MA3_02595	217	Pfam	PF04000	Sas10/Utp3/C1D family	40	117	3.4e-14	IPR007146	Sas10/Utp3/C1D
N_psidii_MA3_02597	456	Pfam	PF02558	Ketopantoate reductase PanE/ApbA	96	254	5.7e-10	IPR013332	Ketopantoate reductase, N-terminal domain
N_psidii_MA3_02597	456	Pfam	PF08546	Ketopantoate reductase PanE/ApbA C terminal	309	433	5.3e-15	IPR013752	Ketopantoate reductase, C-terminal domain
N_psidii_MA3_02598	129	Pfam	PF01984	Double-stranded DNA-binding domain	9	117	6.4e-42	IPR002836	PDCD5-like
N_psidii_MA3_02599	295	Pfam	PF05019	Coenzyme Q (ubiquinone) biosynthesis protein Coq4	51	271	1.9e-95	IPR007715	Ubiquinone biosynthesis protein Coq4
N_psidii_MA3_02602	370	Pfam	PF00856	SET domain	30	220	5.2e-12	IPR001214	SET domain
N_psidii_MA3_02605	70	Pfam	PF00584	SecE/Sec61-gamma subunits of protein translocation complex	14	66	5.2e-14	IPR001901	Protein translocase complex, SecE/Sec61-gamma subunit
N_psidii_MA3_02606	650	Pfam	PF00400	WD domain, G-beta repeat	375	413	4.4e-06	IPR001680	WD40 repeat
N_psidii_MA3_02606	650	Pfam	PF00400	WD domain, G-beta repeat	237	263	0.097	IPR001680	WD40 repeat
N_psidii_MA3_02606	650	Pfam	PF00400	WD domain, G-beta repeat	503	544	0.0049	IPR001680	WD40 repeat
N_psidii_MA3_02607	517	Pfam	PF01169	Uncharacterized protein family UPF0016	434	507	1.4e-19	IPR001727	Gdt1 family
N_psidii_MA3_02607	517	Pfam	PF01169	Uncharacterized protein family UPF0016	256	329	3.3e-21	IPR001727	Gdt1 family
N_psidii_MA3_02609	574	Pfam	PF14306	PUA-like domain	4	165	1.3e-52	IPR025980	ATP-sulfurylase PUA-like domain
N_psidii_MA3_02609	574	Pfam	PF01583	Adenylylsulphate kinase	396	553	1.6e-58
N_psidii_MA3_02609	574	Pfam	PF01747	ATP-sulfurylase	175	388	2e-86	IPR024951	Sulphate adenylyltransferase catalytic domain
N_psidii_MA3_02611	925	Pfam	PF06011	Transient receptor potential (TRP) ion channel	198	717	5.9e-109	IPR010308	TRP-like family
N_psidii_MA3_02611	925	Pfam	PF14558	ML-like domain	53	191	2.1e-40	IPR032800	ML-like domain
N_psidii_MA3_02614	188	Pfam	PF05871	ESCRT-II complex subunit	20	157	1.5e-55	IPR008570	ESCRT-II complex, vps25 subunit
N_psidii_MA3_02616	721	Pfam	PF12738	twin BRCT domain	344	406	9.5e-20	IPR001357	BRCT domain
N_psidii_MA3_02616	721	Pfam	PF00533	BRCA1 C Terminus (BRCT) domain	11	91	2.7e-06	IPR001357	BRCT domain
N_psidii_MA3_02616	721	Pfam	PF00533	BRCA1 C Terminus (BRCT) domain	109	182	2.7e-06	IPR001357	BRCT domain
N_psidii_MA3_02617	538	Pfam	PF00349	Hexokinase	69	258	8.2e-39	IPR022672	Hexokinase, N-terminal
N_psidii_MA3_02617	538	Pfam	PF03727	Hexokinase	265	532	2.8e-56	IPR022673	Hexokinase, C-terminal
N_psidii_MA3_02618	358	Pfam	PF01182	Glucosamine-6-phosphate isomerases/6-phosphogluconolactonase	8	221	4.1e-22	IPR006148	Glucosamine/galactosamine-6-phosphate isomerase
N_psidii_MA3_02619	517	Pfam	PF05224	NDT80 / PhoG like DNA-binding family	152	313	4.5e-33	IPR024061	NDT80 DNA-binding domain
N_psidii_MA3_02620	432	Pfam	PF01979	Amidohydrolase family	66	422	5.7e-14	IPR006680	Amidohydrolase-related
N_psidii_MA3_02621	937	Pfam	PF00933	Glycosyl hydrolase family 3 N terminal domain	16	344	1e-62	IPR001764	Glycoside hydrolase, family 3, N-terminal
N_psidii_MA3_02622	188	Pfam	PF00083	Sugar (and other) transporter	1	161	9.6e-32	IPR005828	Major facilitator, sugar transporter-like
N_psidii_MA3_02624	780	Pfam	PF01055	Glycosyl hydrolases family 31	259	699	2e-105	IPR000322	Glycoside hydrolase family 31
N_psidii_MA3_02624	780	Pfam	PF13802	Galactose mutarotase-like	178	237	2.6e-14	IPR025887	Glycoside hydrolase family 31, N-terminal domain
N_psidii_MA3_02625	771	Pfam	PF00933	Glycosyl hydrolase family 3 N terminal domain	45	365	1.7e-61	IPR001764	Glycoside hydrolase, family 3, N-terminal
N_psidii_MA3_02625	771	Pfam	PF01915	Glycosyl hydrolase family 3 C-terminal domain	406	653	1.1e-50	IPR002772	Glycoside hydrolase family 3 C-terminal domain
N_psidii_MA3_02625	771	Pfam	PF14310	Fibronectin type III-like domain	690	759	1.4e-22	IPR026891	Fibronectin type III-like domain
N_psidii_MA3_02627	265	Pfam	PF02535	ZIP Zinc transporter	66	228	8.5e-32	IPR003689	Zinc/iron permease
N_psidii_MA3_02629	537	Pfam	PF16916	Dimerisation domain of Zinc Transporter	316	377	2.7e-09	IPR027470	Cation efflux protein, cytoplasmic domain
N_psidii_MA3_02629	537	Pfam	PF08595	RXT2-like, N-terminal	453	535	4.1e-18	IPR013904	Transcriptional regulatory protein RXT2, N-terminal
N_psidii_MA3_02629	537	Pfam	PF01545	Cation efflux family	98	293	1.5e-21	IPR002524	Cation efflux protein
N_psidii_MA3_02632	207	Pfam	PF04191	Phospholipid methyltransferase	96	196	1.6e-31	IPR007318	Phospholipid methyltransferase
N_psidii_MA3_02636	560	Pfam	PF02127	Aminopeptidase I zinc metalloprotease (M18)	110	547	2.9e-129	IPR001948	Peptidase M18
N_psidii_MA3_02641	498	Pfam	PF07690	Major Facilitator Superfamily	57	424	2e-36	IPR011701	Major facilitator superfamily
N_psidii_MA3_02645	1087	Pfam	PF00512	His Kinase A (phospho-acceptor) domain	428	490	7.9e-09	IPR003661	Signal transduction histidine kinase, dimerisation/phosphoacceptor domain
N_psidii_MA3_02645	1087	Pfam	PF02518	Histidine kinase-, DNA gyrase B-, and HSP90-like ATPase	616	728	2.8e-21	IPR003594	Histidine kinase/HSP90-like ATPase
N_psidii_MA3_02645	1087	Pfam	PF00072	Response regulator receiver domain	964	1075	5e-19	IPR001789	Signal transduction response regulator, receiver domain
N_psidii_MA3_02647	709	Pfam	PF04082	Fungal specific transcription factor domain	258	392	1.2e-22	IPR007219	Transcription factor domain, fungi
N_psidii_MA3_02647	709	Pfam	PF00172	Fungal Zn(2)-Cys(6) binuclear cluster domain	13	49	3.9e-05	IPR001138	Zn(2)-C6 fungal-type DNA-binding domain
N_psidii_MA3_02648	1121	Pfam	PF01968	Hydantoinase/oxoprolinase	292	582	4.2e-89	IPR002821	Hydantoinase A/oxoprolinase
N_psidii_MA3_02648	1121	Pfam	PF05378	Hydantoinase/oxoprolinase N-terminal region	60	274	8.3e-57	IPR008040	Hydantoinaseoxoprolinase, N-terminal
N_psidii_MA3_02648	1121	Pfam	PF02538	Hydantoinase B/oxoprolinase	787	1091	9.3e-113	IPR003692	Hydantoinase B/oxoprolinase
N_psidii_MA3_02650	246	Pfam	PF02826	D-isomer specific 2-hydroxyacid dehydrogenase, NAD binding domain	113	194	7.5e-23	IPR006140	D-isomer specific 2-hydroxyacid dehydrogenase, NAD-binding domain
N_psidii_MA3_02651	598	Pfam	PF13520	Amino acid permease	109	553	5.3e-61	IPR002293	Amino acid/polyamine transporter I
N_psidii_MA3_02653	131	Pfam	PF08555	Eukaryotic family of unknown function (DUF1754)	5	94	1.4e-14	IPR013865	Protein of unknown function DUF1754, eukaryotic
N_psidii_MA3_02658	579	Pfam	PF04084	Origin recognition complex subunit 2	245	569	1.4e-121	IPR007220	Origin recognition complex, subunit 2
N_psidii_MA3_02659	218	Pfam	PF09419	Mitochondrial PGP phosphatase	8	182	5.5e-66	IPR027706	Mitochondrial PGP phosphatase
N_psidii_MA3_02660	116	Pfam	PF02466	Tim17/Tim22/Tim23/Pmp24 family	22	103	9e-30	IPR003397	Mitochondrial inner membrane translocase subunit Tim17/Tim22/Tim23/peroxisomal protein PMP24
N_psidii_MA3_02664	671	Pfam	PF14686	Polysaccharide lyase family 4, domain II	362	438	2.3e-26	IPR029413	Rhamnogalacturonan lyase, domain II
N_psidii_MA3_02664	671	Pfam	PF14683	Polysaccharide lyase family 4, domain III	451	668	2.3e-23	IPR029411	Rhamnogalacturonan lyase, domain III
N_psidii_MA3_02666	210	Pfam	PF01105	emp24/gp25L/p24 family/GOLD	22	203	7.3e-46	IPR009038	GOLD domain
N_psidii_MA3_02667	618	Pfam	PF09423	PhoD-like phosphatase	287	552	1.1e-42	IPR018946	Alkaline phosphatase D-related
N_psidii_MA3_02669	292	Pfam	PF07890	Rrp15p	131	277	2.5e-37	IPR012459	Ribosomal RNA-processing protein 15
N_psidii_MA3_02670	195	Pfam	PF00111	2Fe-2S iron-sulfur cluster binding domain	89	172	2.2e-12	IPR001041	2Fe-2S ferredoxin-type iron-sulfur binding domain
N_psidii_MA3_02672	777	Pfam	PF05205	COMPASS (Complex proteins associated with Set1p) component shg1	41	140	1.6e-24
N_psidii_MA3_02673	390	Pfam	PF03151	Triose-phosphate Transporter family	26	314	3.9e-28	IPR004853	Sugar phosphate transporter domain
N_psidii_MA3_02675	755	Pfam	PF00443	Ubiquitin carboxyl-terminal hydrolase	157	645	1.3e-35	IPR001394	Peptidase C19, ubiquitin carboxyl-terminal hydrolase
N_psidii_MA3_02679	437	Pfam	PF06155	Protein of unknown function (DUF971)	68	132	2.5e-11	IPR010376	Domain of unknown function DUF971
N_psidii_MA3_02679	437	Pfam	PF02668	Taurine catabolism dioxygenase TauD, TfdA family	164	408	1.8e-36	IPR003819	TauD/TfdA-like domain
N_psidii_MA3_02680	409	Pfam	PF13561	Enoyl-(Acyl carrier protein) reductase	37	286	1.2e-52
N_psidii_MA3_02681	569	Pfam	PF00149	Calcineurin-like phosphoesterase	122	322	1.1e-36	IPR004843	Calcineurin-like phosphoesterase domain, ApaH type
N_psidii_MA3_02682	146	Pfam	PF10178	Proteasome assembly chaperone 3	39	141	2e-05	IPR018788	Proteasome assembly chaperone 3
N_psidii_MA3_02683	1216	Pfam	PF00271	Helicase conserved C-terminal domain	707	796	1.4e-11	IPR001650	Helicase, C-terminal
N_psidii_MA3_02683	1216	Pfam	PF00270	DEAD/DEAH box helicase	399	564	5.8e-07	IPR011545	DEAD/DEAH box helicase domain
N_psidii_MA3_02683	1216	Pfam	PF07717	Oligonucleotide/oligosaccharide-binding (OB)-fold	1042	1155	9.2e-12	IPR011709	Domain of unknown function DUF1605
N_psidii_MA3_02683	1216	Pfam	PF04408	Helicase associated domain (HA2)	858	975	3.9e-21	IPR007502	Helicase-associated domain
N_psidii_MA3_02684	319	Pfam	PF04934	MED6 mediator sub complex component	12	164	1.9e-39	IPR007018	Mediator complex, subunit Med6
N_psidii_MA3_02685	238	Pfam	PF10159	Kinase phosphorylation protein	11	95	3.7e-32	IPR019315	Kinase phosphorylation domain
N_psidii_MA3_02686	1767	Pfam	PF12449	Protein of unknown function (DUF3684)	201	1283	0	IPR022155	Protein of unknown function DUF3684
N_psidii_MA3_02687	452	Pfam	PF01008	Initiation factor 2 subunit family	169	436	1.1e-45	IPR000649	Initiation factor 2B-related
N_psidii_MA3_02689	447	Pfam	PF01960	ArgJ family	36	447	7.5e-150	IPR002813	Arginine biosynthesis protein ArgJ
N_psidii_MA3_02691	227	Pfam	PF00475	Imidazoleglycerol-phosphate dehydratase	61	204	6e-59	IPR000807	Imidazoleglycerol-phosphate dehydratase
N_psidii_MA3_02692	647	Pfam	PF13181	Tetratricopeptide repeat	134	163	0.015	IPR019734	Tetratricopeptide repeat
N_psidii_MA3_02692	647	Pfam	PF12895	Anaphase-promoting complex, cyclosome, subunit 3	15	93	9.6e-23
N_psidii_MA3_02692	647	Pfam	PF13432	Tetratricopeptide repeat	496	547	0.0097
N_psidii_MA3_02694	479	Pfam	PF00501	AMP-binding enzyme	47	340	2.4e-25	IPR000873	AMP-dependent synthetase/ligase
N_psidii_MA3_02695	210	Pfam	PF00501	AMP-binding enzyme	115	191	1.5e-12	IPR000873	AMP-dependent synthetase/ligase
N_psidii_MA3_02695	210	Pfam	PF16177	Acetyl-coenzyme A synthetase N-terminus	40	96	1.3e-06	IPR032387	Acetyl-coenzyme A synthetase, N-terminal domain
N_psidii_MA3_02696	3870	Pfam	PF02260	FATC domain	3840	3870	5.2e-06	IPR003152	FATC domain
N_psidii_MA3_02696	3870	Pfam	PF02259	FAT domain	2810	3161	3.1e-73	IPR003151	PIK-related kinase, FAT
N_psidii_MA3_02696	3870	Pfam	PF00454	Phosphatidylinositol 3- and 4-kinase	3528	3801	5.9e-33	IPR000403	Phosphatidylinositol 3-/4-kinase, catalytic domain
N_psidii_MA3_02698	167	Pfam	PF06094	Gamma-glutamyl cyclotransferase, AIG2-like	8	134	1.4e-20	IPR009288	Gamma-glutamylcyclotransferase, AIG2-like
N_psidii_MA3_02708	505	Pfam	PF02852	Pyridine nucleotide-disulphide oxidoreductase, dimerisation domain	392	503	5.9e-33	IPR004099	Pyridine nucleotide-disulphide oxidoreductase, dimerisation domain
N_psidii_MA3_02708	505	Pfam	PF07992	Pyridine nucleotide-disulphide oxidoreductase	45	369	1.5e-63	IPR023753	FAD/NAD(P)-binding domain
N_psidii_MA3_02710	1280	Pfam	PF00627	UBA/TS-N domain	1245	1276	4.6e-05	IPR015940	Ubiquitin-associated domain
N_psidii_MA3_02710	1280	Pfam	PF12763	Cytoskeletal-regulatory complex EF hand	317	406	8.9e-13	IPR000261	EH domain
N_psidii_MA3_02710	1280	Pfam	PF12763	Cytoskeletal-regulatory complex EF hand	170	257	2.5e-11	IPR000261	EH domain
N_psidii_MA3_02711	754	Pfam	PF06046	Exocyst complex component Sec6	177	752	1.2e-167	IPR010326	Exocyst complex component EXOC3/Sec6
N_psidii_MA3_02713	454	Pfam	PF04438	HIT zinc finger	8	36	5.6e-10	IPR007529	Zinc finger, HIT-type
N_psidii_MA3_02714	892	Pfam	PF03456	uDENN domain	107	171	6.5e-06	IPR005113	uDENN domain
N_psidii_MA3_02714	892	Pfam	PF02141	DENN (AEX-3) domain	203	384	1.1e-40	IPR001194	cDENN domain
N_psidii_MA3_02721	211	Pfam	PF05726	Pirin C-terminal cupin domain	86	193	7.1e-24	IPR008778	Pirin, C-terminal domain
N_psidii_MA3_02722	605	Pfam	PF05730	CFEM domain	323	390	1.5e-12	IPR008427	Extracellular membrane protein, CFEM domain
N_psidii_MA3_02725	883	Pfam	PF03477	ATP cone domain	1	89	1.1e-16	IPR005144	ATP-cone domain
N_psidii_MA3_02725	883	Pfam	PF02867	Ribonucleotide reductase, barrel domain	216	739	7.2e-196	IPR000788	Ribonucleotide reductase large subunit, C-terminal
N_psidii_MA3_02725	883	Pfam	PF00317	Ribonucleotide reductase, all-alpha domain	142	212	9.7e-23	IPR013509	Ribonucleotide reductase large subunit, N-terminal
N_psidii_MA3_02726	426	Pfam	PF01026	TatD related DNase	75	421	5.7e-46	IPR001130	TatD family
N_psidii_MA3_02727	421	Pfam	PF05238	Kinetochore protein CHL4 like	1	389	9.3e-100	IPR007902	Centromere protein Chl4/mis15/CENP-N
N_psidii_MA3_02729	279	Pfam	PF07716	Basic region leucine zipper	183	233	2.5e-12	IPR004827	Basic-leucine zipper domain
N_psidii_MA3_02730	464	Pfam	PF00155	Aminotransferase class I and II	107	432	8.6e-36	IPR004839	Aminotransferase, class I/classII
N_psidii_MA3_02732	367	Pfam	PF00092	von Willebrand factor type A domain	149	308	4.5e-08	IPR002035	von Willebrand factor, type A
N_psidii_MA3_02735	559	Pfam	PF15519	linker between RRM2 and RRM3 domains in RBM39 protein	405	480	6.1e-24	IPR029123	Splicing factor RBM39, linker
N_psidii_MA3_02735	559	Pfam	PF00076	RNA recognition motif. (a.k.a. RRM, RBD, or RNP domain)	274	343	2.5e-21	IPR000504	RNA recognition motif domain
N_psidii_MA3_02735	559	Pfam	PF00076	RNA recognition motif. (a.k.a. RRM, RBD, or RNP domain)	176	241	2.7e-15	IPR000504	RNA recognition motif domain
N_psidii_MA3_02736	381	Pfam	PF04116	Fatty acid hydroxylase superfamily	229	372	1.7e-12	IPR006694	Fatty acid hydroxylase
N_psidii_MA3_02736	381	Pfam	PF00173	Cytochrome b5-like Heme/Steroid binding domain	10	82	4.3e-18	IPR001199	Cytochrome b5-like heme/steroid binding domain
N_psidii_MA3_02738	757	Pfam	PF07217	Heterokaryon incompatibility protein Het-C	13	582	1.4e-284	IPR010816	Heterokaryon incompatibility Het-C
N_psidii_MA3_02739	777	Pfam	PF00481	Protein phosphatase 2C	552	716	8.3e-34	IPR001932	PPM-type phosphatase domain
N_psidii_MA3_02741	357	Pfam	PF03239	Iron permease FTR1 family	8	309	3.7e-80	IPR004923	Iron permease FTR1/Fip1/EfeU
N_psidii_MA3_02743	624	Pfam	PF07732	Multicopper oxidase	33	148	1.7e-43	IPR011707	Multicopper oxidase, type 3
N_psidii_MA3_02743	624	Pfam	PF07731	Multicopper oxidase	366	500	7.3e-40	IPR011706	Multicopper oxidase, type 2
N_psidii_MA3_02743	624	Pfam	PF00394	Multicopper oxidase	159	306	4.8e-36	IPR001117	Multicopper oxidase, type 1
N_psidii_MA3_02744	303	Pfam	PF01066	CDP-alcohol phosphatidyltransferase	49	110	1.3e-12	IPR000462	CDP-alcohol phosphatidyltransferase
N_psidii_MA3_02746	374	Pfam	PF00215	Orotidine 5'-phosphate decarboxylase / HUMPS family	35	361	8.7e-107	IPR001754	Orotidine 5'-phosphate decarboxylase domain
N_psidii_MA3_02747	735	Pfam	PF04082	Fungal specific transcription factor domain	257	357	3.9e-05	IPR007219	Transcription factor domain, fungi
N_psidii_MA3_02747	735	Pfam	PF00172	Fungal Zn(2)-Cys(6) binuclear cluster domain	26	58	2.4e-07	IPR001138	Zn(2)-C6 fungal-type DNA-binding domain
N_psidii_MA3_02750	275	Pfam	PF01922	SRP19 protein	83	171	1.9e-31	IPR002778	Signal recognition particle, SRP19 subunit
N_psidii_MA3_02751	1336	Pfam	PF12455	Dynein associated protein	623	903	5.7e-112	IPR022157	Dynein associated protein
N_psidii_MA3_02751	1336	Pfam	PF01302	CAP-Gly domain	7	67	1e-21	IPR000938	CAP Gly-rich domain
N_psidii_MA3_02752	601	Pfam	PF00505	HMG (high mobility group) box	19	82	1.7e-20	IPR009071	High mobility group box domain
N_psidii_MA3_02755	458	Pfam	PF06068	TIP49 C-terminus	15	416	1.3e-187	IPR010339	TIP49, C-terminal
N_psidii_MA3_02756	470	Pfam	PF00892	EamA-like transporter family	108	243	1e-11	IPR000620	EamA domain
N_psidii_MA3_02756	470	Pfam	PF00892	EamA-like transporter family	284	424	5.3e-09	IPR000620	EamA domain
N_psidii_MA3_02757	163	Pfam	PF02269	Transcription initiation factor IID, 18kD subunit	19	102	2.5e-17	IPR003195	Transcription initiation factor IID, subunit 13
N_psidii_MA3_02763	650	Pfam	PF05794	T-complex protein 11	134	643	9e-105	IPR008862	T-complex 11
N_psidii_MA3_02766	995	Pfam	PF15456	Up-regulated During Septation	71	200	2.1e-41	IPR029191	Up-regulated during septation protein 1
N_psidii_MA3_02768	272	Pfam	PF08551	Eukaryotic integral membrane protein (DUF1751)	46	107	1.1e-05	IPR013861	Transmembrane protein DUF1751, eukaryotic
N_psidii_MA3_02770	614	Pfam	PF03595	Voltage-dependent anion channel	254	598	1.5e-71	IPR004695	Voltage-dependent anion channel
N_psidii_MA3_02771	593	Pfam	PF00481	Protein phosphatase 2C	205	463	4.3e-42	IPR001932	PPM-type phosphatase domain
N_psidii_MA3_02773	835	Pfam	PF00806	Pumilio-family RNA binding repeat	488	520	3.5e-06	IPR001313	Pumilio RNA-binding repeat
N_psidii_MA3_02773	835	Pfam	PF00806	Pumilio-family RNA binding repeat	685	706	0.00039	IPR001313	Pumilio RNA-binding repeat
N_psidii_MA3_02773	835	Pfam	PF00806	Pumilio-family RNA binding repeat	458	483	9.7e-06	IPR001313	Pumilio RNA-binding repeat
N_psidii_MA3_02775	184	Pfam	PF08293	Mitochondrial ribosomal subunit S27	1	64	7.4e-19	IPR013219	Ribosomal protein S27/S33, mitochondrial
N_psidii_MA3_02776	423	Pfam	PF00636	Ribonuclease III domain	169	265	2.3e-17	IPR000999	Ribonuclease III domain
N_psidii_MA3_02779	321	Pfam	PF00887	Acyl CoA binding protein	29	120	4.4e-24	IPR000582	Acyl-CoA-binding protein, ACBP
N_psidii_MA3_02780	742	Pfam	PF10588	NADH-ubiquinone oxidoreductase-G iron-sulfur binding region	115	152	2.6e-17	IPR019574	NADH:ubiquinone oxidoreductase, subunit G, iron-sulphur binding
N_psidii_MA3_02780	742	Pfam	PF09326	NADH-ubiquinone oxidoreductase subunit G, C-terminal	661	711	4.3e-19	IPR015405	NADH-quinone oxidoreductase, chain G, C-terminal
N_psidii_MA3_02780	742	Pfam	PF00384	Molybdopterin oxidoreductase	305	629	8.1e-72	IPR006656	Molybdopterin oxidoreductase
N_psidii_MA3_02780	742	Pfam	PF13510	2Fe-2S iron-sulfur cluster binding domain	33	108	5.1e-20
N_psidii_MA3_02781	664	Pfam	PF02696	Uncharacterized ACR, YdiU/UPF0061 family	84	618	6.5e-127	IPR003846	Uncharacterised protein family UPF0061
N_psidii_MA3_02783	312	Pfam	PF00248	Aldo/keto reductase family	40	292	1.1e-41	IPR023210	NADP-dependent oxidoreductase domain
N_psidii_MA3_02787	674	Pfam	PF01189	16S rRNA methyltransferase RsmB/F	376	583	2.7e-76	IPR001678	SAM-dependent methyltransferase RsmB/NOP2-type
N_psidii_MA3_02787	674	Pfam	PF17125	N-terminal domain of 16S rRNA methyltransferase RsmF	291	371	2.1e-07	IPR031341	Ribosomal RNA small subunit methyltransferase F, N-terminal
N_psidii_MA3_02788	203	Pfam	PF12754	Blt1 N-terminal domain	6	139	1.2e-39
N_psidii_MA3_02788	203	Pfam	PF17183	Get5 carboxyl domain	150	199	9e-18
N_psidii_MA3_02789	114	Pfam	PF00241	Cofilin/tropomyosin-type actin-binding protein	3	106	1e-27	IPR002108	Actin-depolymerising factor homology domain
N_psidii_MA3_02790	583	Pfam	PF00118	TCP-1/cpn60 chaperonin family	54	558	4.3e-87	IPR002423	Chaperonin Cpn60/TCP-1 family
N_psidii_MA3_02796	490	Pfam	PF00349	Hexokinase	9	233	2.4e-44	IPR022672	Hexokinase, N-terminal
N_psidii_MA3_02796	490	Pfam	PF03727	Hexokinase	245	481	1.7e-41	IPR022673	Hexokinase, C-terminal
N_psidii_MA3_02797	252	Pfam	PF03227	Gamma interferon inducible lysosomal thiol reductase (GILT)	73	171	1.2e-17	IPR004911	Gamma interferon inducible lysosomal thiol reductase GILT
[truncated: 10,183 more rows]

## Sheet: S2
Supplementary Table S2.	EggNOG annotation of the N. psidii MA3 proteome.
Protein	seed_eggNOG_ortholog	seed_ortholog_evalue	best_tax_level	KEGG_ko	KEGG_Pathway	KEGG_Module	KEGG_Reaction	KEGG_rclass	Description
MA3_00003	86049.XP_008724642.1	4.9e-18	Eurotiomycetes						Amidase family
MA3_00006	710243.XP_007592604.1	2.4e-149	Sordariomycetes
MA3_00007	63577.G9NT82	1.6e-131	Ascomycota						Heterokaryon incompatibility protein (HET)
MA3_00010	78579.XP_003665310.1	1.2e-41	Chaetomiaceae
MA3_00011	97096.XP_007792661.1	1.1e-217	Ascomycota	ko:K00489	ko00120, ko00140, ko01100, ko03320, ko04976, ko04979, map00120, map00140, map01100, map03320, map04976, map04979	M00104	R01463, R07372, R08961	RC00524	Belongs to the cytochrome P450 family
MA3_00012	28564.XP_002340845.1	1.7e-130	Ascomycota						Belongs to the cytochrome P450 family
MA3_00013	5037.XP_001541087.1	5.7e-44	Eurotiomycetes	ko:K00489	ko00120, ko00140, ko01100, ko03320, ko04976, ko04979, map00120, map00140, map01100, map03320, map04976, map04979	M00104	R01463, R07372, R08961	RC00524	Belongs to the cytochrome P450 family
MA3_00014	35720.XP_003652704.1	1.5e-69	Chaetomiaceae	ko:K00489	ko00120, ko00140, ko01100, ko03320, ko04976, ko04979, map00120, map00140, map01100, map03320, map04976, map04979	M00104	R01463, R07372, R08961	RC00524	Belongs to the cytochrome P450 family
MA3_00015	5970.XP_009158271.1	5.6e-46	Chaetothyriomycetidae	ko:K04630,ko:K04640	ko04015, ko04022, ko04024, ko04062, ko04071, ko04261, ko04360, ko04371, ko04540, ko04611, ko04670, ko04713, ko04723, ko04724, ko04725, ko04726, ko04727, ko04728, ko04730, ko04914, ko04915, ko04916, ko04921, ko04923, ko04924, ko04926, ko04934, ko04971, ko05012, ko05030, ko05032, ko05034, ko05133, ko05142, ko05145, ko05200, map04015, map04022, map04024, map04062, map04071, map04261, map04360, map04…	M00695			Guanine nucleotide-binding protein alpha-3 subunit
MA3_00016	293227.XP_008712568.1	1.9e-159	Chaetothyriomycetidae						Fungal specific transcription factor domain
MA3_00017	43229.XP_007720738.1	0	Chaetothyriomycetidae	ko:K01469	ko00480, map00480		R00251	RC00553	Hydantoinase B/oxoprolinase
MA3_00018	293227.XP_008712565.1	6e-213	Chaetothyriomycetidae						Major Facilitator Superfamily
MA3_00019	223192.XP_007914247.1	1.1e-211	Sordariomycetes						Belongs to the oxygen-dependent FAD-linked oxidoreductase family
MA3_00021	140110.NechaP42325	1.6e-24	Nectriaceae						LysM domain
MA3_00022	140110.NechaP101141	9.8e-175	Nectriaceae
MA3_00023	29875.EHK25847	3.9e-111	Hypocreaceae
MA3_00024	1108849.XP_002566266.1	0	Eurotiomycetes						Acyl transferase domain in polyketide synthase (PKS) enzymes.
MA3_00027	1108849.XP_002566263.1	3.2e-261	Eurotiales						Fungal trichothecene efflux pump (TRI12)
MA3_00028	710243.XP_007602303.1	0	Glomerellales	ko:K13621	ko00564, map00564		R09072, R09073	RC00003, RC00021, RC01091, RC02308	Protein of unknown function (DUF3419)
MA3_00029	80884.CCF40055	8.2e-61	Sordariomycetes						Cytochrome P450
MA3_00033	53485.EFQ91061	4.6e-182	Ascomycota	ko:K15503,ko:K21440					Ankyrin repeats (3 copies)
MA3_00034	29850.GGTG_09971T0	9.3e-43	Magnaporthales
MA3_00035	655981.L8G2C1	3.4e-25	Ascomycota
MA3_00036	80884.CCF33910	4.4e-121	Glomerellales						epoxide hydrolase
MA3_00037	117187.FVEG_13295T0	2.8e-109	Nectriaceae						Methyltransferase domain
MA3_00038	5127.CCT69488	3.3e-18	Nectriaceae						Methyltransferase domain
MA3_00040	140110.NechaP87628	0	Nectriaceae						OPT oligopeptide transporter protein
MA3_00041	140110.NechaP75636	3.2e-63	Nectriaceae
MA3_00042	140110.NechaP83495	8.8e-212	Nectriaceae	ko:K01302					Belongs to the peptidase M28 family
MA3_00043	474922.ELA31924	3.6e-245	Glomerellales						Belongs to the glycosyl hydrolase 5 (cellulase A) family
MA3_00044	710243.XP_007601625.1	2.6e-132	Glomerellales						C6 zinc finger domain-containing protein
MA3_00045	1051613.XP_003006581.1	5.9e-281	Glomerellales	ko:K00108	ko00260, ko01100, map00260, map01100	M00555	R01025	RC00087	Choline dehydrogenase
MA3_00046	140110.NechaP101235	2.5e-11	Nectriaceae
MA3_00048	140110.NechaP23989	5.1e-91	Nectriaceae						Major Facilitator Superfamily
MA3_00049	140110.NechaP23989	1.9e-14	Nectriaceae						Major Facilitator Superfamily
MA3_00051	5507.FOXG_09201P0	3.1e-187	Nectriaceae	ko:K00306	ko00260, ko00310, ko01100, ko04146, map00260, map00310, map01100, map04146		R00610, R02204	RC00060, RC00083, RC00557	FAD dependent oxidoreductase
MA3_00052	97096.XP_007797922.1	8.8e-237	Sordariomycetes	ko:K16261					proline permease
MA3_00053	393283.XP_007828971.1	5.3e-75	Sordariomycetes	ko:K11517	ko00630, ko01100, ko01110, ko01120, ko01130, ko01200, ko04146, map00630, map01100, map01110, map01120, map01130, map01200, map04146	M00532	R00475	RC00042	FMN-dependent dehydrogenase
MA3_00054	117187.FVEG_00152T0	4.4e-14	Nectriaceae						Semialdehyde dehydrogenase, NAD binding domain
MA3_00055	29875.EHK18639	3.7e-242	Hypocreaceae	ko:K00129	ko00010, ko00340, ko00350, ko00360, ko00410, ko00980, ko00982, ko01100, ko01110, ko01120, ko05204, map00010, map00340, map00350, map00360, map00410, map00980, map00982, map01100, map01110, map01120, map05204		R00711, R00904, R02536, R02537, R02695, R02697, R03300, R03302, R04882, R04883, R04888, R04889, R04891, R04892, R04996, R07104, R08282, R08283, R08307	RC00047, RC00080, RC00242, RC01735	Belongs to the aldehyde dehydrogenase family
MA3_00057	140110.NechaP35467	0	Nectriaceae	ko:K08711	ko02010, map02010				Belongs to the ABC transporter superfamily. ABCG family. PDR (TC 3.A.1.205) subfamily
MA3_00059	5111.M1VVU7	1.3e-97	Clavicipitaceae	ko:K00480	ko00621, ko00624, ko00626, ko01100, ko01120, ko01220, map00621, map00624, map00626, map01100, map01120, map01220		R00818, R05632, R06915, R06936, R06939	RC00389	FAD binding domain
MA3_00063	140110.NechaP99514	1.8e-258	Nectriaceae
MA3_00065	63577.G9NZZ1	1.2e-69	Hypocreaceae						Acetyltransferase (GNAT) family
MA3_00066	5127.CCT70794	1.6e-10	Nectriaceae
MA3_00067	140110.NechaP36251	1.2e-242	Nectriaceae						Hint-domain
MA3_00068	5127.CCT70406	6.3e-111	Nectriaceae						Dynamin family
MA3_00071	101028.EKJ70838	1.7e-26	Nectriaceae
MA3_00072	140110.NechaP36435	0	Nectriaceae						ABC-2 family transporter protein
MA3_00074	140110.NechaP91713	1.1e-296	Nectriaceae	ko:K10838	ko03420, map03420				Rad4 beta-hairpin domain 1
MA3_00075	29875.EHK23647	3.3e-176	Hypocreaceae						Fungal specific transcription factor domain
MA3_00078	140110.NechaP87892	3.5e-261	Nectriaceae	ko:K01417					Belongs to the peptidase M36 family
MA3_00079	5127.CCT67605	4.9e-48	Nectriaceae						Glutathione-dependent formaldehyde-activating enzyme
MA3_00080	140110.NechaP34684	2.2e-128	Nectriaceae						Belongs to the glycosyl hydrolase 18 family
MA3_00081	101028.EKJ70844	3.8e-34	Sordariomycetes
MA3_00082	117187.FVEG_02314T0	3e-147	Nectriaceae	ko:K14782					Apoptosis antagonizing transcription factor
MA3_00083	5127.CCT69944	4.1e-122	Nectriaceae	ko:K03593					AAA domain
MA3_00084	140110.NechaP91722	1.1e-105	Nectriaceae	ko:K12839	ko03040, map03040				RNA splicing
MA3_00087	140110.NechaP103678	1.5e-135	Nectriaceae						auxin-activated signaling pathway
MA3_00088	140110.NechaP67119	0	Nectriaceae	ko:K08869					to ubiquinone biosynthesis protein
MA3_00089	140110.NechaP67121	2.9e-155	Nectriaceae	ko:K01764	ko00860, map00860		R02480	RC00727, RC02130	Links covalently the heme group to the apoprotein of cytochrome c
MA3_00090	5127.CCT69949	9.8e-62	Nectriaceae
MA3_00091	5127.CCT69950	3.6e-120	Nectriaceae
MA3_00092	140110.NechaP35793	3.8e-93	Nectriaceae
MA3_00094	5518.FGSG_08390P0	6.3e-214	Nectriaceae	ko:K12571	ko03018, map03018				Catalytic subunit of the poly(A)-nuclease (PAN) deadenylation complex, one of two cytoplasmic mRNA deadenylases involved in mRNA turnover. PAN specifically shortens poly(A) tails of RNA and the activity is stimulated by poly(A)-binding protein PAB1. PAN deadenylation is followed by rapid degradation of the shortened mRNA tails by the CCR4-NOT complex. Deadenylated mRNAs are then degraded by two a…
MA3_00095	72228.T5AFG5	0	Hypocreales	ko:K12571	ko03018, map03018				Catalytic subunit of the poly(A)-nuclease (PAN) deadenylation complex, one of two cytoplasmic mRNA deadenylases involved in mRNA turnover. PAN specifically shortens poly(A) tails of RNA and the activity is stimulated by poly(A)-binding protein PAB1. PAN deadenylation is followed by rapid degradation of the shortened mRNA tails by the CCR4-NOT complex. Deadenylated mRNAs are then degraded by two a…
MA3_00096	117187.FVEG_02304T0	1.6e-125	Nectriaceae						Methyltransferase domain
MA3_00097	474922.ELA24450	5.9e-69	Ascomycota						Protein tyrosine kinase
MA3_00098	140110.NechaP35283	6.9e-285	Nectriaceae	ko:K21641					GAL4-like Zn(II)2Cys6 (or C6 zinc) binuclear cluster DNA-binding domain
MA3_00100	117187.FVEG_02301T0	2.4e-165	Nectriaceae						Copper-fist
MA3_00105	5127.CCT70746	3.5e-162	Nectriaceae	ko:K00077	ko00770, ko01100, ko01110, map00770, map01100, map01110	M00119	R02472	RC00726	Catalyzes the NADPH-dependent reduction of ketopantoate into pantoic acid
MA3_00106	140110.NechaP91733	0	Nectriaceae						Phytochrome region
MA3_00107	140110.NechaP6182	4.8e-68	Nectriaceae						integral membrane protein
MA3_00108	140110.NechaP91734	4.9e-140	Nectriaceae	ko:K03115	ko03008, ko04064, ko04137, ko04139, ko04310, ko04520, ko04712, ko05162, ko05168, ko05169, map03008, map04064, map04137, map04139, map04310, map04520, map04712, map05162, map05168, map05169				Plays a complex role in regulating the basal catalytic activity of the alpha subunit
MA3_00109	140110.NechaP35722	2.9e-113	Nectriaceae						Cupin-like domain
MA3_00110	140110.NechaP36818	4.4e-175	Nectriaceae						RanGTP-binding protein
MA3_00111	63577.G9P041	5.2e-250	Hypocreaceae	ko:K03267	ko03015, map03015				Elongation factor Tu C-terminal domain
MA3_00112	51453.EGR44498	0	Hypocreaceae	ko:K01610	ko00010, ko00020, ko00620, ko00710, ko01100, ko01110, ko01120, ko01130, ko01200, map00010, map00020, map00620, map00710, map01100, map01110, map01120, map01130, map01200	M00003,M00170	R00341	RC00002, RC02741	Phosphoenolpyruvate carboxykinase
MA3_00113	5507.FOXG_03412P0	0	Nectriaceae						SNF2 family N-terminal domain
MA3_00114	29875.EHK23694	2e-208	Hypocreaceae	ko:K04705	ko04144, ko04630, map04144, map04630	M00408			VHS domain
MA3_00115	78579.XP_003663473.1	2.1e-13	Sordariomycetes
MA3_00116	140110.NechaP77582	0	Nectriaceae	ko:K08331	ko04136, ko04138, ko04140, ko04211, map04136, map04138, map04140, map04211				Belongs to the ATG13 family. Fungi subfamily
MA3_00118	5127.CCT70079	0	Nectriaceae						Broad-Complex, Tramtrack and Bric a brac
MA3_00120	140110.NechaP35257	7.3e-153	Nectriaceae	ko:K15110					Belongs to the mitochondrial carrier (TC 2.A.29) family
MA3_00121	29875.EHK23689	5.5e-80	Hypocreaceae
MA3_00123	710243.XP_007599656.1	3.5e-169	Glomerellales	ko:K12471	ko04144, map04144				ENTH domain-containing protein
MA3_00124	140110.NechaP91745	6.5e-97	Nectriaceae	ko:K16466					EF-hand domain pair
MA3_00125	140110.NechaP77586	0	Nectriaceae	ko:K14297	ko03013, ko05164, map03013, map05164	M00427			Nucleoporin autopeptidase
MA3_00126	5127.CCT70084	5.3e-71	Nectriaceae						SET (Su(var)3-9, Enhancer-of-zeste, Trithorax) domain
MA3_00127	78579.XP_003664161.1	2.3e-203	Chaetomiaceae						Belongs to the glycosyl hydrolase 43 family
MA3_00129	5507.FOXG_03281P0	8.8e-48	Nectriaceae
MA3_00130	140110.NechaP91747	2e-273	Nectriaceae	ko:K11306,ko:K11378					Belongs to the MYST (SAS MOZ) family
MA3_00131	568076.XP_007818472.1	1.2e-08	Clavicipitaceae						NADH-ubiquinone oxidoreductase MWFE subunit
MA3_00132	117187.FVEG_02150T0	3.7e-189	Nectriaceae	ko:K14168	ko04122, map04122				Plays a central role in 2-thiolation of mcm(5)S(2)U at tRNA wobble positions of tRNA(Lys), tRNA(Glu) and tRNA(Gln). Directly binds tRNAs and probably acts by catalyzing adenylation of tRNAs, an intermediate required for 2-thiolation. It is unclear whether it acts as a sulfurtransferase that transfers sulfur from thiocarboxylated URM1 onto the uridine of tRNAs at wobble position. Prior mcm(5) tRNA…
MA3_00133	92637.XP_007809762.1	2.6e-117	Clavicipitaceae	ko:K02936	ko03010, map03010	M00177,M00179			Ribosomal protein L7Ae/L30e/S12e/Gadd45 family
MA3_00134	31870.EFQ35457	1.9e-82	Glomerellales	ko:K01673	ko00910, map00910		R00132, R10092	RC02807	Reversible hydration of carbon dioxide
MA3_00135	474922.ELA24891	4.2e-54	Glomerellales						Nuclear transport factor 2
MA3_00137	140110.NechaP77597	3.8e-230	Nectriaceae
MA3_00139	5518.FGSG_13357P0	3.7e-89	Nectriaceae	ko:K19365					Putative adipose-regulatory protein (Seipin)
MA3_00140	92637.XP_007809777.1	1.2e-244	Clavicipitaceae	ko:K20121					Fes/CIP4 homology domain
MA3_00141	140110.NechaP58915	0	Nectriaceae	ko:K12604	ko03018, map03018				CCR4-NOT transcription complex subunit 1 HEAT repeat
MA3_00142	101028.EKJ75177	1.6e-88	Nectriaceae						Phenazine biosynthesis-like protein
MA3_00144	101028.EKJ75179	2.4e-119	Nectriaceae
MA3_00145	140110.NechaP99554	6.5e-152	Nectriaceae	ko:K17803					Methyltransferase domain
MA3_00146	5507.FOXG_03268P0	6.3e-202	Nectriaceae						Uncharacterized protein family UPF0029
MA3_00147	140110.NechaP36680	8.7e-176	Nectriaceae	ko:K04563	ko04011, ko04111, ko04113, map04011, map04111, map04113	M00692,M00693			Belongs to the protein kinase superfamily
MA3_00151	5518.FGSG_08467P0	2.8e-141	Nectriaceae	ko:K06656,ko:K06657	ko04111, map04111				Cyclin
MA3_00152	140110.NechaP91756	0	Nectriaceae						Heavy-metal-associated domain
MA3_00153	5127.CCT73088	2.9e-27	Nectriaceae						NACHT domain
MA3_00154	140110.NechaP103693	1.9e-177	Nectriaceae						Sodium:dicarboxylate symporter family
MA3_00155	140110.NechaP67174	0	Nectriaceae	ko:K00380	ko00920, ko01100, ko01120, map00920, map01100, map01120	M00176	R00858	RC00065	to assimilatory sulfite reductase
MA3_00156	474922.ELA30037	2.7e-60	Glomerellales						Acetyltransferase (GNAT) domain
MA3_00157	1051613.XP_003007886.1	5.6e-106	Glomerellales	ko:K07734					Putative FMN-binding domain
MA3_00158	5507.FOXG_03255P0	3.1e-310	Nectriaceae	ko:K18932					Spinocerebellar ataxia type 10 protein domain
MA3_00159	140110.NechaP67177	5.5e-164	Nectriaceae	ko:K00772	ko00270, ko01100, map00270, map01100	M00034	R01402	RC00063, RC02819	Catalyzes the reversible phosphorylation of S-methyl-5'- thioadenosine (MTA) to adenine and 5-methylthioribose-1-phosphate. Involved in the breakdown of MTA, a major by-product of polyamine biosynthesis. Responsible for the first step in the methionine salvage pathway after MTA has been generated from S- adenosylmethionine. Has broad substrate specificity with 6- aminopurine nucleosides as prefer…
MA3_00162	5127.CCT70111	8.9e-38	Nectriaceae	ko:K20246	ko00340, map00340		R01169, R11014	RC00003, RC02308, RC03323, RC03324	Histidine-specific methyltransferase, SAM-dependent
MA3_00163	117187.FVEG_02128T0	1.9e-84	Nectriaceae	ko:K20246	ko00340, map00340		R01169, R11014	RC00003, RC02308, RC03323, RC03324	Histidine-specific methyltransferase, SAM-dependent
MA3_00164	140110.NechaP67175	7.2e-230	Nectriaceae						Fungal specific transcription factor domain
MA3_00167	5507.FOXG_03259P0	4.8e-64	Nectriaceae
MA3_00169	140110.NechaP30529	3.7e-90	Nectriaceae	ko:K21632					Negative acting factor
MA3_00170	29875.EHK16873	1.3e-130	Hypocreaceae	ko:K21632					Negative acting factor
MA3_00171	140110.NechaP72877	1.2e-264	Nectriaceae	ko:K19791					Belongs to the multicopper oxidase family
MA3_00172	140110.NechaP64597	3.9e-184	Nectriaceae	ko:K01078	ko00730, ko00740, ko01100, map00730, map00740, map01100		R00548, R02135	RC00017	acid phosphatase
MA3_00173	29875.EHK16876	1.3e-73	Hypocreaceae						VIT family
MA3_00174	140110.NechaP75014	1.2e-61	Nectriaceae						Acetyltransferase (GNAT) domain
MA3_00176	92637.XP_007815145.1	1.1e-261	Clavicipitaceae	ko:K03935	ko00190, ko01100, ko04714, ko04723, ko04932, ko05010, ko05012, ko05016, map00190, map01100, map04714, map04723, map04932, map05010, map05012, map05016	M00143	R11945	RC00061	Belongs to the complex I 49 kDa subunit family
MA3_00177	140110.NechaP65697	5.6e-235	Nectriaceae	ko:K06126	ko00130, ko01100, ko01110, map00130, map01100, map01110	M00128	R04982, R08773	RC02670	FAD-dependent monooxygenase required for the C5-ring hydroxylation during ubiquinone biosynthesis. Catalyzes the hydroxylation of 3-polyprenyl-4-hydroxybenzoic acid to 3- polyprenyl-4,5-dihydroxybenzoic acid. The electrons required for the hydroxylation reaction may be funneled indirectly from NADPH via a ferredoxin ferredoxin reductase system to COQ6
MA3_00178	5507.FOXG_00682P0	8.9e-263	Nectriaceae						HeH/LEM domain
MA3_00179	140110.NechaP102380	1.3e-104	Nectriaceae	ko:K02127	ko00190, ko01100, ko04714, ko05010, ko05012, ko05016, map00190, map01100, map04714, map05010, map05012, map05016	M00158			ATP synthase subunit 4, mitochondrial precursor
MA3_00180	140110.NechaP65701	1.4e-213	Nectriaceae	ko:K14771					CBF/Mak21 family
MA3_00181	140110.NechaP65704	0	Nectriaceae	ko:K16073					CorA-like Mg2+ transporter protein
MA3_00183	140110.NechaP75021	2.8e-108	Nectriaceae	ko:K14407	ko03015, map03015				Hinge domain of cleavage stimulation factor subunit 2
MA3_00184	117187.FVEG_00824T0	2.8e-225	Nectriaceae	ko:K20367					Endoplasmic Reticulum-Golgi Intermediate Compartment (ERGIC)
MA3_00186	140110.NechaP90195	2e-271	Nectriaceae						Sel1-like repeats.
MA3_00187	568076.XP_007820518.1	2.8e-143	Clavicipitaceae	ko:K02739	ko03050, map03050	M00340			Proteasome subunit beta type 7 precursor
MA3_00188	117187.FVEG_00821T0	0	Nectriaceae	ko:K18715					Nucleoporin FG repeat region
MA3_00189	5507.FOXG_00692P0	6.8e-196	Nectriaceae	ko:K03027	ko00230, ko00240, ko01100, ko03020, ko04623, ko05169, map00230, map00240, map01100, map03020, map04623, map05169	M00181,M00182	R00435, R00441, R00442, R00443	RC02795	DNA-directed RNA polymerases I and III 40 kDa polypeptide
MA3_00190	5127.CCT63435	1.1e-226	Nectriaceae	ko:K10686	ko04120, map04120				NEDD8-activating enzyme E1 catalytic subunit
MA3_00191	140110.NechaP31035	1e-285	Nectriaceae	ko:K11137	ko03460, ko04150, map03460, map04150				Telomere length regulation protein
MA3_00192	5507.FOXG_00695P0	0	Nectriaceae						to polarity-defective 6
MA3_00193	140110.NechaP75030	1.3e-189	Hypocreales						G protein-coupled glucose receptor regulating Gpa2
MA3_00194	568076.XP_007820524.1	2.7e-51	Clavicipitaceae
MA3_00195	140110.NechaP65714	0	Nectriaceae	ko:K03251,ko:K15340	ko03013, map03013				DNA repair metallo-beta-lactamase
MA3_00196	29875.EHK15753	2.6e-43	Hypocreaceae	ko:K12621	ko03018, ko03040, map03018, map03040	M00354,M00396,M00397			Binds specifically to the 3'-terminal U-tract of U6 snRNA
MA3_00197	140110.NechaP90203	0	Nectriaceae	ko:K03869	ko04120, ko04340, ko04341, map04120, map04340, map04341	M00384			Belongs to the cullin family
MA3_00198	568076.XP_007820542.1	6.9e-38	Clavicipitaceae	ko:K11087	ko03040, ko05322, map03040, map05322	M00351,M00352,M00354,M00355,M00398			LSM domain
MA3_00200	140110.NechaP57487	0	Nectriaceae						Nonselective cation channel
MA3_00204	140110.NechaP98863	1e-88	Nectriaceae	ko:K08064	ko04612, ko05152, map04612, map05152				to CCAAT-binding complex subunit HAP2
MA3_00205	5507.FOXG_00702P0	5.2e-177	Nectriaceae						phosphotransferase enzyme family domain protein
MA3_00206	5127.CCT65831	1.1e-63	Nectriaceae
MA3_00207	223192.XP_007914787.1	2.5e-14	Sordariomycetes	ko:K14965,ko:K14968					Dpy-30 domain-containing protein
MA3_00208	140110.NechaP104073	2.8e-76	Nectriaceae	ko:K02953	ko03010, map03010	M00177			Belongs to the universal ribosomal protein uS15 family
MA3_00209	29875.EHK15743	1.4e-194	Hypocreaceae	ko:K12837	ko03040, map03040				U2 snRNP auxiliary factor large subunit
MA3_00210	140110.NechaP5326	1.7e-141	Nectriaceae	ko:K03660	ko03410, map03410				8-oxoguanine DNA glycosylase, N-terminal domain
MA3_00211	5518.FGSG_07051P0	0	Nectriaceae	ko:K12828	ko03040, map03040	M00352			U2 snRNP component prp10
MA3_00214	101028.EKJ77092	9.2e-155	Nectriaceae						C2H2-type zinc finger
MA3_00218	140110.NechaP78962	0	Nectriaceae						Cortical protein marker for cell polarity
MA3_00219	140110.NechaP78963	5.9e-122	Nectriaceae	ko:K01174					Staphylococcal nuclease homologues
MA3_00220	140110.NechaP60055	2.6e-164	Nectriaceae	ko:K05758	ko04144, ko04666, ko04810, ko05100, ko05130, ko05131, ko05132, map04144, map04666, map04810, map05100, map05130, map05131, map05132				Functions as actin-binding component of the Arp2 3 complex which is involved in regulation of actin polymerization and together with an activating nucleation-promoting factor (NPF) mediates the formation of branched actin networks
MA3_00221	5507.FOXG_01751P0	0	Nectriaceae	ko:K14556	ko03008, map03008				Dip2/Utp12 Family
MA3_00222	140110.NechaP78966	6.7e-45	Nectriaceae						Ring finger
MA3_00223	5507.FOXG_01750P0	3.2e-114	Nectriaceae	ko:K01557	ko00350, ko01100, ko01120, map00350, map01100, map01120		R01085	RC00326, RC00446	to fumarylacetoacetate hydrolase family
MA3_00224	568076.XP_007820545.1	3.5e-94	Clavicipitaceae	ko:K00452	ko00380, ko01100, map00380, map01100	M00038	R02665	RC00387	Catalyzes the oxidative ring opening of 3- hydroxyanthranilate to 2-amino-3-carboxymuconate semialdehyde, which spontaneously cyclizes to quinolinate
MA3_00225	140110.NechaP73588	3.7e-58	Nectriaceae	ko:K14686	ko01524, ko04978, map01524, map04978				Ctr copper transporter family
MA3_00226	140110.NechaP92657	8.8e-112	Nectriaceae						NUDIX domain
MA3_00227	140110.NechaP78971	4.6e-28	Nectriaceae
MA3_00229	5127.CCT65814	1.2e-195	Nectriaceae						EXS family
MA3_00231	101028.EKJ77075	4.9e-305	Nectriaceae						F-box domain-containing protein
MA3_00233	5127.CCT65811	6.7e-54	Nectriaceae
MA3_00236	5507.FOXG_01740P0	0	Nectriaceae	ko:K09243,ko:K21547	ko04113, ko04138, ko04139, map04113, map04138, map04139				Transcriptional regulatory protein pro-1
MA3_00239	5507.FOXG_01739P0	1.3e-297	Nectriaceae						Sterile alpha motif.
MA3_00240	140110.NechaP92662	5.8e-144	Nectriaceae	ko:K04564	ko04013, ko04068, ko04146, ko04211, ko04212, ko04213, ko05016, map04013, map04068, map04146, map04211, map04212, map04213, map05016				Iron/manganese superoxide dismutases, C-terminal domain
MA3_00241	140110.NechaP68312	2.1e-115	Nectriaceae						STIMATE family
MA3_00242	140110.NechaP100038	1.5e-26	Nectriaceae
MA3_00243	140110.NechaP102552	7.8e-18	Nectriaceae						Chitin synthesis regulation, resistance to Congo red
MA3_00244	140110.NechaP100036	7.7e-49	Nectriaceae
MA3_00245	223192.XP_007911113.1	1.3e-120	Sordariomycetes						phosphatase
MA3_00247	72228.T5AE42	3.6e-63	Hypocreales	ko:K03627					factor 1
MA3_00249	101028.EKJ76226	1.6e-70	Nectriaceae						Glutathione-dependent formaldehyde-activating enzyme
MA3_00250	92637.XP_007810679.1	7.1e-101	Clavicipitaceae						GPI anchored protein
MA3_00251	140110.NechaP41813	2.7e-151	Nectriaceae	ko:K03218,ko:K15507					RNA 2'-O ribose methyltransferase substrate binding
MA3_00252	5127.CCT68491	0	Nectriaceae						PHD/FYVE-zinc-finger like domain
MA3_00253	31870.EFQ29156	7e-13	Glomerellales						C-x8-c-x5-c-x3-h type zinc finger protein
MA3_00254	140110.NechaP41236	3.2e-150	Nectriaceae	ko:K12177					COP9 signalosome complex subunit 3
MA3_00255	63577.G9NVV9	7.9e-114	Hypocreaceae
MA3_00256	92637.XP_007810680.1	1.3e-52	Clavicipitaceae
MA3_00257	5518.FGSG_10170P0	1.1e-102	Nectriaceae						SUR7/PalI family
MA3_00259	140110.NechaP104485	2.5e-170	Nectriaceae						Tat pathway signal sequence
MA3_00260	140110.NechaP80472	0	Nectriaceae						Protein of unknown function (DUF3433)
MA3_00261	29850.GGTG_02201T0	5.3e-20	Magnaporthales						Domain of unknown function (DUF3328)
MA3_00264	72228.T5AH49	3.1e-311	Hypocreales						spray protein
MA3_00267	140110.NechaP80474	2e-114	Nectriaceae						Regulatory protein
MA3_00272	5518.FGSG_10164P0	5e-110	Nectriaceae						Altered inheritance of mitochondria protein 24, mitochondrial
MA3_00274	101028.EKJ77208	2.3e-09	Nectriaceae
MA3_00276	73501.XP_006673591.1	2.8e-49	Hypocreales						zinc finger
MA3_00279	140110.NechaP41232	1.8e-110	Nectriaceae						zinc finger
MA3_00282	80884.CCF39430	4.8e-26	Glomerellales
MA3_00283	140110.NechaP102660	1.1e-54	Nectriaceae						Belongs to the cytochrome b5 family
MA3_00284	5127.CCT68505	1e-202	Nectriaceae						Tpr domain-containing protein
MA3_00285	5507.FOXG_05249P0	1.2e-181	Nectriaceae	ko:K10873	ko03440, map03440				Double Strand Break repair protein mus-11
MA3_00286	5507.FOXG_05250P0	7.7e-134	Nectriaceae	ko:K11888					Involved in ubiquitin-mediated protein degradation. Regulatory factor in the ubiquitin proteasome pathway that controls the turnover of proteasome substrates. Targets proteasomes to the nucleus and facilitates the degradation of nuclear proteins
MA3_00288	101028.EKJ77201	3.3e-114	Nectriaceae						RNA recognition motif
MA3_00289	5127.CCT68509	6.1e-27	Nectriaceae						DSBA-like thioredoxin domain
MA3_00290	5507.FOXG_05253P0	5.5e-254	Nectriaceae
MA3_00293	140110.NechaP93654	6.6e-111	Nectriaceae	ko:K12597	ko03018, map03018	M00393			zinc finger
MA3_00294	176275.XP_008599431.1	3.6e-94	Hypocreales						ORMDL family
MA3_00296	140110.NechaP100574	1.4e-93	Nectriaceae						O-methyltransferase
MA3_00297	27337.EGY13347	1.1e-55	Glomerellales						Ph-response regulator
MA3_00298	63577.G9NVY2	1.5e-34	Hypocreaceae
MA3_00299	5127.CCT68517	3e-279	Nectriaceae						Component of the Mediator complex, a coactivator involved in the regulated transcription of nearly all RNA polymerase II-dependent genes. Mediator functions as a bridge to convey information from gene-specific regulatory proteins to the basal RNA polymerase II transcription machinery. Mediator is recruited to promoters by direct interactions with regulatory proteins and serves as a scaffold for t…
MA3_00300	29875.EHK26304	4.5e-111	Hypocreaceae						Glycosyl hydrolases family 16
MA3_00303	140110.NechaP41740	1.9e-126	Nectriaceae	ko:K00604	ko00670, ko00970, map00670, map00970		R03940	RC00026, RC00165	methionyl-tRNA formyltransferase
MA3_00304	29875.EHK27148	2.6e-93	Hypocreaceae						Predicted SAM-dependent RNA methyltransferase
MA3_00305	140110.NechaP69476	3e-246	Nectriaceae	ko:K01288					Serine carboxypeptidase
MA3_00306	29875.EHK27144	8.3e-120	Hypocreaceae						Glutathione S-transferase, C-terminal domain
MA3_00310	5127.CCT68523	1.4e-210	Nectriaceae	ko:K09051	ko04011, map04011				to bZIP transcription factor AtfA
MA3_00312	101028.EKJ77185	1.6e-155	Nectriaceae	ko:K11560					Conserved hypothetical protein
MA3_00313	5507.FOXG_05267P0	2.5e-77	Nectriaceae	ko:K18168,ko:K20352					Plays an essential role in the assembly of succinate dehydrogenase (SDH), an enzyme complex (also referred to as respiratory complex II) that is a component of both the tricarboxylic acid (TCA) cycle and the mitochondrial electron transport chain, and which couples the oxidation of succinate to fumarate with the reduction of ubiquinone (coenzyme Q) to ubiquinol. Required for flavinylation (covale…
MA3_00314	140110.NechaP102663	1.1e-102	Nectriaceae	ko:K20352					Endoplasmic reticulum vesicle protein 25
MA3_00315	5465.ENH81773	3.3e-42	Glomerellales	ko:K11095	ko03040, map03040	M00351			Component of the spliceosomal U1 snRNP, which is essential for recognition of the pre-mRNA 5' splice-site and the subsequent assembly of the spliceosome. U1-C is directly involved in initial 5' splice-site recognition for both constitutive and regulated alternative splicing. The interaction with the 5' splice-site seems to precede base-pairing between the pre-mRNA and the U1 snRNA. Stimulates com…
MA3_00316	101028.EKJ77180	2.8e-228	Nectriaceae
MA3_00318	51453.EGR52928	5.1e-32	Hypocreaceae
MA3_00319	63577.G9NK01	9.9e-33	Hypocreaceae						A Receptor for Ubiquitination Targets
MA3_00320	568076.XP_007819170.1	1.7e-76	Clavicipitaceae	ko:K06950					Metal dependent phosphohydrolases with conserved 'HD' motif.
MA3_00321	63577.G9NJZ6	4.8e-104	Hypocreaceae						GTP-binding protein
MA3_00323	140110.NechaP40718	4.3e-173	Nectriaceae	ko:K18338	ko00051, ko01120, map00051, map01120		R03772	RC00537	Amidohydrolase
MA3_00324	140110.NechaP61241	2.2e-168	Nectriaceae						Central kinetochore-associated
MA3_00325	176275.XP_008598032.1	1.7e-216	Hypocreales	ko:K12763	ko04113, map04113				Transcription factor
MA3_00331	140110.NechaP80512	1.5e-85	Nectriaceae						BRCT domain, a BRCA1 C-terminus domain
MA3_00333	29875.EHK27133	0	Hypocreaceae	ko:K01908	ko00640, ko01100, map00640, map01100		R00926, R01354	RC00004, RC00043, RC00070, RC02816	Acetyl-coenzyme A synthetase N-terminus
MA3_00334	140110.NechaP104502	6.8e-22	Nectriaceae						Clock-controlled protein 6
MA3_00337	5507.FOXG_05282P0	3e-158	Nectriaceae						Quinone oxidoreductase
MA3_00338	5507.FOXG_05283P0	8.4e-144	Nectriaceae						Dienelactone hydrolase family
MA3_00339	140110.NechaP69505	5.2e-291	Nectriaceae	ko:K07466	ko03030, ko03420, ko03430, ko03440, ko03460, map03030, map03420, map03430, map03440, map03460	M00288			As part of the replication protein A (RPA RP-A), a single-stranded DNA-binding heterotrimeric complex, may play an essential role in DNA replication, recombination and repair. Binds and stabilizes single-stranded DNA intermediates, preventing complementary DNA reannealing and recruiting different proteins involved in DNA metabolism
MA3_00340	140110.NechaP61256	5.7e-210	Nectriaceae	ko:K00147	ko00330, ko00332, ko01100, ko01110, ko01130, ko01230, map00330, map00332, map01100, map01110, map01130, map01230	M00015	R03313	RC00684	Gamma-glutamyl phosphate reductase
MA3_00341	29875.EHK24273	8.1e-201	Hypocreaceae						Major Facilitator Superfamily
MA3_00342	5507.FOXG_05287P0	5e-177	Nectriaceae	ko:K01754	ko00260, ko00290, ko01100, ko01110, ko01130, ko01200, ko01230, map00260, map00290, map01100, map01110, map01130, map01200, map01230	M00570	R00220, R00996	RC00418, RC02600	Pyridoxal-phosphate dependent enzyme
MA3_00343	92637.XP_007810145.1	2e-214	Clavicipitaceae	ko:K00053	ko00290, ko00770, ko01100, ko01110, ko01130, ko01210, ko01230, map00290, map00770, map01100, map01110, map01130, map01210, map01230	M00019,M00570	R03051, R04439, R04440, R05068, R05069, R05071	RC00726, RC00836, RC00837, RC01726	Acetohydroxy acid isomeroreductase, catalytic domain
MA3_00344	5518.FGSG_10117P0	1.6e-97	Nectriaceae	ko:K10579	ko04120, map04120				Belongs to the ubiquitin-conjugating enzyme family
MA3_00345	72228.T5A274	0	Hypocreales	ko:K00698	ko00520, map00520		R02335	RC00005	Chitin Synthase
MA3_00349	140110.NechaP61266	2.3e-123	Nectriaceae	ko:K19850	ko04011, map04011				Opy2 protein
MA3_00351	73501.XP_006667195.1	1.5e-116	Hypocreales	ko:K07827	ko01521, ko01522, ko04010, ko04012, ko04013, ko04014, ko04015, ko04062, ko04068, ko04071, ko04072, ko04137, ko04138, ko04140, ko04150, ko04151, ko04210, ko04211, ko04213, ko04214, ko04218, ko04320, ko04360, ko04370, ko04371, ko04540, ko04550, ko04650, ko04660, ko04662, ko04664, ko04714, ko04720, ko04722, ko04725, ko04726, ko04730, ko04810, ko04910, ko04912, ko04914, ko04915, ko04916, ko04917, ko0…				Ras-2 protein
MA3_00353	5127.CCT68225	1.2e-14	Ascomycota
MA3_00359	140110.NechaP93686	0	Nectriaceae						Meiotic cell cortex C-terminal pleckstrin homology
MA3_00360	117187.FVEG_02832T0	4.8e-81	Nectriaceae	ko:K18342					OTU-like cysteine protease
MA3_00361	140110.NechaP93688	1.6e-117	Nectriaceae	ko:K21552					Thiopurine S-methyltransferase (TPMT)
MA3_00363	51453.EGR45620	1e-101	Hypocreaceae						Enoyl-(Acyl carrier protein) reductase
MA3_00366	5507.FOXG_05301P0	4.2e-105	Nectriaceae	ko:K17776					Glutathione S-transferase, C-terminal domain
MA3_00367	140110.NechaP69522	9.9e-251	Nectriaceae						CT11-RanBPM
MA3_00368	31870.EFQ29189	4.3e-64	Glomerellales						INO80 complex subunit Ies4
MA3_00373	393283.XP_007830418.1	7.1e-206	Sordariomycetes	ko:K00463	ko00380, ko01100, ko05143, map00380, map01100, map05143	M00038	R00678, R02702, R02909, R03628	RC00356	indoleamine
MA3_00374	73501.XP_006667046.1	1e-12	Hypocreales						Fic/DOC family
MA3_00376	5507.FOXG_05307P0	1.2e-103	Nectriaceae
MA3_00377	92637.XP_007808960.1	4.6e-62	Clavicipitaceae						Cell division control protein 14, SIN component
MA3_00379	5127.CCT68563	9.5e-174	Nectriaceae	ko:K00804	ko00900, ko01100, ko01110, ko01130, map00900, map01100, map01110, map01130	M00367	R01658, R02003, R02061	RC00279	Belongs to the FPP GGPP synthase family
MA3_00380	140110.NechaP61279	7.3e-211	Nectriaceae						Integral peroxisomal membrane peroxin
MA3_00383	5507.FOXG_05313P0	0	Nectriaceae	ko:K18669	ko04111, map04111				Serine/Threonine protein kinases, catalytic domain
MA3_00388	63577.G9PBF0	0	Hypocreaceae	ko:K13566	ko00250, map00250		R00269, R00348	RC00010	Polyamine transport protein
MA3_00389	5127.CCT69351	1.6e-92	Nectriaceae
MA3_00390	140110.NechaP104514	1.5e-91	Nectriaceae	ko:K12194	ko04144, ko04217, map04144, map04217	M00412			Belongs to the SNF7 family
MA3_00392	92637.XP_007808953.1	1e-197	Clavicipitaceae						Anp1
MA3_00394	140110.NechaP80541	4.6e-131	Nectriaceae	ko:K01247	ko03410, map03410				to DNA-3-methyladenine glycosylase
MA3_00397	5127.CCT68571	3.4e-81	Nectriaceae						gpi-anchored cell wall organization protein
MA3_00398	5507.FOXG_05320P0	5.7e-110	Nectriaceae	ko:K12840	ko03040, map03040				glycine rich nucleic binding domain
MA3_00399	5507.FOXG_05321P0	8.1e-231	Nectriaceae	ko:K18655					Belongs to the DEAD box helicase family
MA3_00402	5111.M1WDG0	4.1e-57	Clavicipitaceae	ko:K02891	ko03010, map03010	M00177			Ribosomal L22e protein family
MA3_00403	5507.FOXG_05326P0	2.8e-150	Nectriaceae	ko:K15109	ko04714, map04714				Belongs to the mitochondrial carrier (TC 2.A.29) family
MA3_00405	117187.FVEG_02803T0	0	Nectriaceae
MA3_00408	568076.XP_007819226.1	2.8e-09	Clavicipitaceae
MA3_00409	5111.M1W2N9	1.6e-26	Clavicipitaceae	ko:K10845	ko03022, ko03420, map03022, map03420	M00290			Transcription factor TFIIH complex subunit Tfb5
MA3_00410	140110.NechaP61301	1.2e-125	Nectriaceae	ko:K12663	ko04146, map04146				to enoyl-CoA hydratase isomerase family protein
MA3_00412	92637.XP_007808938.1	7.6e-186	Clavicipitaceae						Splits internally a 1,3-beta-glucan molecule and transfers the newly generated reducing end (the donor) to the non- reducing end of another 1,3-beta-glucan molecule (the acceptor) forming a 1,3-beta linkage, resulting in the elongation of 1,3- beta-glucan chains in the cell wall
MA3_00414	5507.FOXG_05332P0	0	Nectriaceae	ko:K20463					Pleckstrin homology domain
MA3_00415	101028.EKJ75933	1.5e-185	Nectriaceae	ko:K12486	ko04144, map04144				Ubiquitin associated domain
MA3_00416	474922.ELA24585	6.4e-126	Glomerellales						Putative lipopolysaccharide-modifying enzyme.
MA3_00417	140110.NechaP69559	2.6e-106	Nectriaceae						Ornithine decarboxylase antizyme
MA3_00418	140110.NechaP41455	1.4e-283	Nectriaceae	ko:K01493,ko:K01663	ko00240, ko00340, ko01100, ko01110, ko01230, map00240, map00340, map01100, map01110, map01230	M00026,M00429	R01663, R04558	RC00010, RC00074, RC01190, RC01943	Belongs to the HisA HisF family
MA3_00419	140110.NechaP80556	4.6e-72	Nectriaceae						TFIIIC subunit
MA3_00420	117187.FVEG_02793T0	3.6e-232	Nectriaceae						Vacuolar protein sorting-associated protein 62
MA3_00421	101028.EKJ76149	0	Nectriaceae
MA3_00423	140110.NechaP41550	6.6e-195	Nectriaceae
MA3_00424	140110.NechaP69563	1.6e-120	Nectriaceae	ko:K02866	ko03010, map03010	M00177,M00179			60s ribosomal protein
MA3_00425	140110.NechaP61313	7e-53	Nectriaceae	ko:K02908	ko03010, map03010	M00177,M00179			ribosomal protein
MA3_00426	568076.XP_007819242.1	1.2e-186	Clavicipitaceae						M protein, serotype 2.1 precursor
MA3_00429	140110.NechaP93717	4.4e-272	Nectriaceae						Vacuolar segregation subunit 7
MA3_00430	5111.M1WD97	7.1e-177	Clavicipitaceae	ko:K14191			R10716	RC00003, RC03257	Belongs to the class I-like SAM-binding methyltransferase superfamily. rRNA adenine N(6)-methyltransferase family
MA3_00431	29875.EHK25524	2.2e-232	Hypocreaceae	ko:K12855	ko03040, map03040	M00354			PRP1 splicing factor, N-terminal
MA3_00432	92637.XP_007808921.1	3.5e-30	Clavicipitaceae
MA3_00433	140110.NechaP69568	3e-134	Hypocreales						meiotically up-regulated 65 protein
MA3_00434	140110.NechaP69568	8.8e-230	Hypocreales						meiotically up-regulated 65 protein
MA3_00435	117187.FVEG_02979T0	2.5e-199	Nectriaceae	ko:K14803					to protein phosphatase 2C
MA3_00440	5507.FOXG_05152P0	2.6e-33	Nectriaceae	ko:K21804					S-adenosyl-L-methionine-dependent protein-lysine N- methyltransferase that methylates elongation factor 1-alpha
MA3_00442	140110.NechaP123159	1.4e-39	Nectriaceae						Allergen Asp F7
MA3_00443	140110.NechaP40471	5.1e-291	Nectriaceae						Fungal domain of unknown function (DUF1712)
MA3_00444	568076.XP_007819256.1	1.7e-25	Hypocreales						F-box domain-containing protein
MA3_00448	140110.NechaP69572	1.9e-226	Nectriaceae						Kelch motif
MA3_00449	92637.XP_007808910.1	2.8e-124	Clavicipitaceae	ko:K03943	ko00190, ko01100, ko04714, ko04723, ko04932, ko05010, ko05012, ko05016, map00190, map01100, map04714, map04723, map04932, map05010, map05012, map05016	M00143	R11945	RC00061	NADH-ubiquinone oxidoreductase 24 kDa subunit
MA3_00451	101028.EKJ73112	4.8e-15	Nectriaceae						HNH endonuclease
MA3_00453	140110.NechaP93727	1.8e-240	Nectriaceae	ko:K01904	ko00130, ko00360, ko00940, ko01100, ko01110, map00130, map00360, map00940, map01100, map01110	M00039,M00137,M00350	R01616, R01943, R02194, R02221, R02255, R06583	RC00004, RC00131	AMP-binding enzyme C-terminal domain
MA3_00454	140110.NechaP61325	3e-174	Nectriaceae						FAD dependent oxidoreductase
MA3_00455	140110.NechaP69580	0	Nectriaceae	ko:K03114	ko04011, ko04111, ko04113, map04011, map04111, map04113	M00693			Protein tyrosine kinase
MA3_00457	101028.EKJ76171	1.1e-80	Nectriaceae	ko:K01493	ko00240, ko01100, map00240, map01100	M00429	R01663	RC00074	MafB19-like deaminase
MA3_00458	140110.NechaP41227	0	Nectriaceae	ko:K01493,ko:K08337	ko00240, ko01100, ko04136, ko04138, ko04140, ko04216, map00240, map01100, map04136, map04138, map04140, map04216	M00429	R01663	RC00074	to APG12 activating enzyme ApgG
MA3_00459	140110.NechaP93732	1.3e-06	Nectriaceae
MA3_00461	140110.NechaP73708	3.6e-24	Nectriaceae
MA3_00463	27337.EGY13616	2.8e-19	Glomerellales	ko:K05287	ko00563, ko01100, map00563, map01100	M00065	R05923, R05924, R08107	RC00017	biosynthesis protein
MA3_00464	117187.FVEG_02994T0	6e-44	Nectriaceae	ko:K05287	ko00563, ko01100, map00563, map01100	M00065	R05923, R05924, R08107	RC00017	Glycosylphosphatidylinositol anchor biosynthesis protein 11
MA3_00466	51453.EGR45581	2.5e-22	Hypocreaceae						Proteolipid membrane potential modulator
MA3_00468	568076.XP_007819272.1	5.8e-222	Clavicipitaceae						Major Facilitator Superfamily
MA3_00469	140110.NechaP106140	0	Nectriaceae	ko:K20098					to DNA excision repair protein Rad26L
MA3_00470	140110.NechaP41285	7.3e-121	Nectriaceae						Methyltransferase domain
MA3_00472	117187.FVEG_02998T0	4.1e-90	Nectriaceae	ko:K14560	ko03008, map03008				U3 small nucleolar ribonucleoprotein
MA3_00473	117187.FVEG_02999T0	3.8e-77	Nectriaceae	ko:K02963	ko03010, map03010	M00178			Ribosomal protein S18
MA3_00474	5127.CCT68397	1.9e-277	Nectriaceae						Pentatricopeptide repeat domain
MA3_00475	140110.NechaP61333	2.3e-166	Nectriaceae	ko:K15303	ko00980, map00980		R09412, R09413, R09414, R09415	RC00099	to aldo-keto reductase AKR7
MA3_00477	140110.NechaP104536	1.1e-196	Nectriaceae						EamA-like transporter family
MA3_00478	140110.NechaP80590	3.8e-25	Nectriaceae
MA3_00479	140110.NechaP123372	5.2e-53	Nectriaceae						Protein SnodProt1 precursor
MA3_00481	101028.EKJ72405	7.1e-209	Nectriaceae						Major Facilitator Superfamily
MA3_00482	140110.NechaP103842	1e-183	Nectriaceae						Fungal specific transcription factor domain
MA3_00484	140110.NechaP67597	0	Nectriaceae						Belongs to the ABC transporter superfamily. ABCG family. PDR (TC 3.A.1.205) subfamily
MA3_00485	140110.NechaP85997	2.1e-21	Nectriaceae
MA3_00486	140110.NechaP99727	3.3e-71	Hypocreales						Protein kinase domain
MA3_00487	5127.CCT69849	3.3e-30	Hypocreales						Acetyltransferase (GNAT) family
MA3_00488	36630.CADNFIAP00004517	6.1e-38	Eurotiales						GNAT family N-acetyltransferase
MA3_00489	5127.CCT69426	6.2e-11	Nectriaceae
MA3_00490	140110.NechaP36628	7.3e-182	Nectriaceae
MA3_00491	27337.EGY13653	6.4e-263	Glomerellales						Secreted protein
MA3_00493	140110.NechaP10759	0	Nectriaceae	ko:K21842					to Saccharomyces cerevisiae EFR3 (YMR212C)
MA3_00498	140110.NechaP92074	3.6e-98	Nectriaceae	ko:K04353,ko:K07836,ko:K07837	ko04010, ko04014, ko04015, ko04024, ko04062, ko04510, ko04530, ko04611, ko04670, ko04720, ko04722, ko04934, ko04972, ko05211, map04010, map04014, map04015, map04024, map04062, map04510, map04530, map04611, map04670, map04720, map04722, map04934, map04972, map05211				Ras subfamily of RAS small GTPases
MA3_00499	140110.NechaP35841	2.1e-127	Nectriaceae						Enoyl-(Acyl carrier protein) reductase
MA3_00501	1173701.A0A066WVA2	1.3e-123	Glomerellales
MA3_00502	140110.NechaP79279	1.7e-65	Nectriaceae						Component of the SWR1 complex which mediates the ATP- dependent exchange of histone H2A for the H2A variant HZT1 leading to transcriptional regulation of selected genes by chromatin remodeling. Involved in chromosome stability
MA3_00503	5507.FOXG_02104P0	1e-69	Nectriaceae						Domain of unknown function (DUF4602)
MA3_00504	568076.XP_007822118.1	2.8e-288	Clavicipitaceae	ko:K11215	ko04011, map04011				STE like transcription factors
MA3_00510	92637.XP_007806939.1	3e-238	Clavicipitaceae	ko:K13886					Belongs to the WD repeat coronin family
MA3_00511	140110.NechaP37841	1.3e-143	Nectriaceae						PH domain
MA3_00512	140110.NechaP37841	5.3e-261	Nectriaceae						PH domain
MA3_00513	140110.NechaP68561	2.4e-136	Nectriaceae	ko:K01814	ko00340, ko01100, ko01110, ko01230, map00340, map01100, map01110, map01230	M00026	R04640	RC00945	1-(5-phosphoribosyl)-5- (5-phosphoribosylamino)methylideneamino imidazole-4-carboxamide isomerase
MA3_00514	5127.CCT66142	1.2e-272	Nectriaceae						Heterokaryon incompatibility protein (HET)
MA3_00516	140110.NechaP88054	4.4e-258	Nectriaceae						Ferric reductase like transmembrane component
MA3_00520	5507.FOXG_02074P0	2.6e-205	Nectriaceae	ko:K09554	ko04151, map04151				Cdc37 C terminal domain
MA3_00522	568076.XP_007822086.1	3.1e-116	Clavicipitaceae						PLC-like phosphodiesterase
MA3_00523	140110.NechaP102576	1.5e-45	Nectriaceae						Thiamine-binding protein
MA3_00524	710243.XP_007601291.1	2.7e-228	Glomerellales	ko:K00135	ko00250, ko00310, ko00350, ko00650, ko00760, ko01100, ko01120, map00250, map00310, map00350, map00650, map00760, map01100, map01120	M00027	R00713, R00714, R02401	RC00080	Belongs to the aldehyde dehydrogenase family
MA3_00525	101028.EKJ70727	3.1e-227	Nectriaceae	ko:K13524	ko00250, ko00280, ko00410, ko00640, ko00650, ko01100, ko01120, ko04727, map00250, map00280, map00410, map00640, map00650, map01100, map01120, map04727	M00027	R00908, R01648, R04188	RC00006, RC00062, RC00160	Belongs to the class-III pyridoxal-phosphate-dependent aminotransferase family
MA3_00528	140110.NechaP79250	0	Nectriaceae						GAL4-like Zn(II)2Cys6 (or C6 zinc) binuclear cluster DNA-binding domain
MA3_00529	140110.NechaP68547	5.5e-178	Nectriaceae						Protein of unknown function (DUF1682)
MA3_00531	140110.NechaP22444	1.1e-208	Nectriaceae	ko:K16315					Domain of unknown function
MA3_00533	140110.NechaP68548	9.3e-136	Nectriaceae						Peroxin 26
MA3_00534	1173701.A0A066X8Q8	8.3e-62	Glomerellales	ko:K12834	ko03040, map03040	M00352			factor ini1
MA3_00535	5507.FOXG_02082P0	1.5e-25	Nectriaceae						pinin/SDK/memA/ protein conserved region
MA3_00537	140110.NechaP38604	8e-148	Nectriaceae	ko:K08726	ko00590, ko00625, ko01100, ko01120, ko04146, map00590, map00625, map01100, map01120, map04146		R05842, R07108, R07109, R07110, R07111	RC01477, RC01757	alpha/beta hydrolase fold
MA3_00538	29875.EHK24575	2e-41	Hypocreaceae						Microtubule-associated protein CRIPT
MA3_00539	5507.FOXG_02086P0	0	Nectriaceae	ko:K14802					Belongs to the cation transport ATPase (P-type) (TC 3.A.3) family. Type IV subfamily
MA3_00541	5507.FOXG_02087P0	4.3e-75	Nectriaceae						Life-span regulatory factor
MA3_00544	5127.CCT66133	2.1e-240	Nectriaceae						Kelch motif
MA3_00545	140110.NechaP79260	5.7e-80	Nectriaceae
MA3_00547	140110.NechaP37870	2.8e-118	Nectriaceae	ko:K12868	ko03040, map03040	M00355			pre-mRNA-splicing factor SYF2
MA3_00548	140110.NechaP79262	1.9e-134	Nectriaceae						NAD dependent epimerase/dehydratase family
MA3_00550	5127.CCT66137	3.4e-117	Nectriaceae	ko:K11341					chromatin organization
MA3_00551	140110.NechaP68554	7.2e-215	Nectriaceae	ko:K17775	ko04139, map04139				Component of the ERMES MDM complex, which serves as a molecular tether to connect the endoplasmic reticulum and mitochondria. Components of this complex are involved in the control of mitochondrial shape and protein biogenesis and may function in phospholipid exchange. MDM34 is required for the interaction of the ER-resident membrane protein MMM1 and the outer mitochondrial membrane-resident beta…
MA3_00552	5507.FOXG_02094P0	2.3e-105	Nectriaceae	ko:K19786	ko00562, ko01100, ko04070, map00562, map01100, map04070		R05202	RC00002, RC00078	Phosphorylates Ins(1,3,4,5,6)P5 at position 2 to form Ins(1,2,3,4,5,6)P6 (InsP6 or phytate)
MA3_00554	92637.XP_007809481.1	0	Clavicipitaceae	ko:K09396,ko:K09401,ko:K09403,ko:K09413					FORKHEAD
MA3_00555	92637.XP_007809480.1	1.7e-92	Clavicipitaceae	ko:K19730	ko04136, ko04140, ko04211, map04136, map04140, map04211				Autophagy-related protein 101
MA3_00556	140110.NechaP100129	6.6e-210	Nectriaceae	ko:K13336	ko04146, map04146				Peroxin-3
MA3_00557	72228.T5A0Y3	5.2e-64	Hypocreales	ko:K20300					TRAPP complex subunit (Bet5)
MA3_00558	140110.NechaP79164	9.8e-232	Nectriaceae	ko:K07359,ko:K21157	ko04138, ko04140, ko04152, ko04211, ko04920, ko04921, ko05034, map04138, map04140, map04152, map04211, map04920, map04921, map05034				to calcium calmodulin-dependent protein kinase kinase
MA3_00563	140110.NechaP68493	2.1e-224	Nectriaceae	ko:K08286					Serine threonine-protein kinase hal4
MA3_00564	140110.NechaP38462	5.9e-151	Nectriaceae
MA3_00568	92637.XP_007809474.1	3.3e-45	Clavicipitaceae	ko:K03020	ko00230, ko00240, ko01100, ko03020, ko04623, ko05169, map00230, map00240, map01100, map03020, map04623, map05169	M00181,M00182	R00435, R00441, R00442, R00443	RC02795	DNA-directed RNA polymerase I and III 14 KDA polypeptide
MA3_00569	140110.NechaP102572	3.5e-61	Nectriaceae	ko:K03950	ko00190, ko01100, ko04714, ko04723, ko04932, ko05010, ko05012, ko05016, map00190, map01100, map04714, map04723, map04932, map05010, map05012, map05016	M00146			Complex1_LYR-like
MA3_00570	140110.NechaP73610	9.4e-77	Nectriaceae	ko:K12873	ko03040, map03040	M00355			G10 protein
MA3_00571	117187.FVEG_08263T0	9.5e-85	Nectriaceae						zinc finger
MA3_00572	117187.FVEG_08265T0	1.7e-46	Nectriaceae						Telomerase activating protein Est1
MA3_00573	140110.NechaP79157	4.9e-90	Nectriaceae						Telomerase activating protein Est1
MA3_00574	101028.EKJ75081	1.6e-193	Nectriaceae	ko:K00856	ko00230, ko01100, map00230, map01100		R00185	RC00002, RC00017	pfkB family carbohydrate kinase
MA3_00575	117187.FVEG_08267T0	7.3e-138	Nectriaceae	ko:K02938	ko03010, map03010	M00177			60S ribosomal protein
MA3_00577	101028.EKJ75083	8.6e-217	Nectriaceae						WSTF, HB1, Itc1p, MBD9 motif 1
MA3_00578	29875.EHK24692	1.2e-61	Hypocreaceae						Fungal protein of unknown function (DUF1770)
MA3_00579	117187.FVEG_08271T0	4.1e-237	Nectriaceae	ko:K03265	ko03015, map03015				Eukaryotic peptide chain release factor subunit 1
MA3_00580	5127.CCT66668	0	Nectriaceae						Domain of unknown function (DUF4782)
MA3_00581	140110.NechaP60233	5.3e-127	Nectriaceae						Domain of unknown function (DUF4782)
MA3_00582	140110.NechaP104137	0	Nectriaceae						Putative death-receptor fusion protein (DUF2428)
MA3_00583	140110.NechaP60228	2e-115	Nectriaceae	ko:K02865	ko03010, map03010	M00177			Belongs to the universal ribosomal protein uL1 family
MA3_00584	31870.EFQ24877	1.4e-22	Glomerellales
MA3_00585	72228.T5AP08	1.8e-260	Hypocreales	ko:K08098	ko00563, map00563		R07129		GPI mannosyltransferase
MA3_00587	117187.FVEG_08277T0	1.7e-82	Nectriaceae	ko:K03094	ko04110, ko04111, ko04114, ko04120, ko04141, ko04310, ko04341, ko04350, ko04710, ko05168, ko05200, map04110, map04111, map04114, map04120, map04141, map04310, map04341, map04350, map04710, map05168, map05200	M00379,M00380,M00381,M00382,M00387,M00407,M00411			Belongs to the SKP1 family
MA3_00589	5127.CCT65955	8.2e-23	Nectriaceae	ko:K02924	ko03010, map03010	M00177,M00179			Ribosomal L39 protein
MA3_00590	140110.NechaP38639	1.7e-92	Nectriaceae	ko:K07942					Belongs to the small GTPase superfamily. Arf family
MA3_00592	5465.ENH81114	1.8e-144	Glomerellales
MA3_00597	63577.G9P510	1.2e-285	Hypocreaceae	ko:K13100					Domain in DAP-5, eIF4G, MA-3 and other proteins.
MA3_00598	101028.EKJ76617	3.1e-37	Nectriaceae	ko:K09658	ko00510, ko00563, ko01100, map00510, map00563, map01100		R01009, R05916	RC00005	Dolichol phosphate-mannose biosynthesis regulatory protein (DPM2)
MA3_00599	5507.FOXG_02204P0	0	Nectriaceae
MA3_00600	5507.FOXG_02205P0	9.8e-34	Nectriaceae
MA3_00601	40384.G7Y1Y9	1.2e-11	Eurotiales
MA3_00602	51453.EGR50651	2e-179	Hypocreaceae						PHD zinc finger
MA3_00605	140110.NechaP79376	4.1e-118	Nectriaceae
MA3_00606	5507.FOXG_02209P0	1.8e-163	Nectriaceae						zinc finger
MA3_00614	5127.CCT66247	2.4e-164	Nectriaceae						TAP-like protein
MA3_00615	101028.EKJ78060	1.6e-80	Nectriaceae	ko:K02896	ko03010, map03010	M00177,M00179			Ribosome biogenesis protein RLP24
MA3_00616	101028.EKJ78061	4.2e-47	Nectriaceae	ko:K09539					Mitochondrial import inner membrane translocase subunit tim-14
MA3_00617	5507.FOXG_02214P0	8.4e-115	Nectriaceae						QDE-2-interacting protein
MA3_00618	5507.FOXG_02215P0	3e-130	Nectriaceae	ko:K10885	ko03450, map03450	M00297			Single-stranded DNA-dependent ATP-dependent helicase
MA3_00619	140110.NechaP68667	6.6e-162	Nectriaceae	ko:K10885	ko03450, map03450	M00297			Single-stranded DNA-dependent ATP-dependent helicase
MA3_00620	140110.NechaP102585	1.7e-78	Nectriaceae						Domain of unknown function (DUF4149)
MA3_00621	63577.G9P525	1.8e-15	Hypocreaceae
MA3_00623	51453.EGR50867	3.8e-141	Hypocreaceae	ko:K01101	ko00627, ko01120, map00627, map01120		R03024	RC00151	Haloacid dehalogenase-like hydrolase
MA3_00624	140110.NechaP68672	2e-157	Nectriaceae						Protein of unknown function (DUF1295)
MA3_00625	176275.XP_008599298.1	4.6e-101	Hypocreales	ko:K03165	ko03440, ko03460, map03440, map03460	M00414			Introduces a single-strand break via transesterification at a target site in duplex DNA. Releases the supercoiling and torsional tension of DNA introduced during the DNA replication and transcription by transiently cleaving and rejoining one strand of the DNA duplex. The scissile phosphodiester is attacked by the catalytic tyrosine of the enzyme, resulting in the formation of a DNA-(5'-phosphotyr…
MA3_00626	140110.NechaP38149	1.4e-189	Nectriaceae	ko:K03165	ko03440, ko03460, map03440, map03460	M00414			Introduces a single-strand break via transesterification at a target site in duplex DNA. Releases the supercoiling and torsional tension of DNA introduced during the DNA replication and transcription by transiently cleaving and rejoining one strand of the DNA duplex. The scissile phosphodiester is attacked by the catalytic tyrosine of the enzyme, resulting in the formation of a DNA-(5'-phosphotyr…
MA3_00628	140110.NechaP100218	1.3e-148	Nectriaceae						Putative Sin3 binding protein
MA3_00630	117187.FVEG_05393T0	8e-227	Nectriaceae						pH-response transcription factor pacC RIM101
MA3_00635	29875.EHK15552	9e-191	Hypocreaceae						Fungal specific transcription factor domain
MA3_00636	117187.FVEG_05395T0	3.3e-65	Nectriaceae
MA3_00642	92637.XP_007806733.1	9.9e-128	Clavicipitaceae	ko:K17943,ko:K17944					Pumilio-like repeats
MA3_00643	140110.NechaP100220	1.7e-93	Nectriaceae						Protein of unknown function (DUF1640)
MA3_00644	117187.FVEG_05398T0	3.1e-60	Nectriaceae	ko:K00505,ko:K11562	ko00350, ko00950, ko00965, ko01100, ko01110, ko04916, map00350, map00950, map00965, map01100, map01110, map04916	M00042	R00731, R02078, R02363, R02383, R04693, R04884	RC00046, RC00150, RC00180	Nnf1
MA3_00645	5518.FGSG_06707P0	3e-144	Nectriaceae						to Saccharomyces cerevisiae YHR131C and YNL144C
MA3_00649	223192.XP_007910810.1	7.1e-88	Sordariomycetes	ko:K19718	ko04139, map04139				ntf2 and rrm domain-containing protein
MA3_00651	5127.CCT66264	1.2e-116	Nectriaceae	ko:K14815					Component of the ribosome assembly machinery. Nuclear paralog of the ribosomal protein P0, it binds pre-60S subunits at an early stage of assembly in the nucleolus, and is replaced by P0 in cytoplasmic pre-60S subunits and mature 80S ribosomes
MA3_00652	63577.G9P5T1	3e-95	Hypocreaceae	ko:K11093	ko03040, map03040	M00351			U1 small nuclear ribonucleoprotein of 70kDa MW N terminal
MA3_00653	568076.XP_007822239.1	6.7e-69	Clavicipitaceae	ko:K17424					Mitochondrial ribosomal protein L51 / S25 / CI-B8 domain
MA3_00654	140110.NechaP123141	8.8e-120	Nectriaceae	ko:K01803	ko00010, ko00051, ko00562, ko00710, ko01100, ko01110, ko01120, ko01130, ko01200, ko01230, map00010, map00051, map00562, map00710, map01100, map01110, map01120, map01130, map01200, map01230	M00001,M00002,M00003	R01015	RC00423	Triosephosphate isomerase
MA3_00656	474922.ELA32064	2.3e-64	Glomerellales						integral membrane protein
MA3_00657	140110.NechaP92941	9.8e-194	Nectriaceae						zinc finger
MA3_00659	140110.NechaP38914	6.8e-217	Nectriaceae						GAL4-like Zn(II)2Cys6 (or C6 zinc) binuclear cluster DNA-binding domain
MA3_00662	5127.CCT66269	1.1e-125	Nectriaceae
MA3_00663	140110.NechaP104215	1.4e-221	Nectriaceae						GAL4-like Zn(II)2Cys6 (or C6 zinc) binuclear cluster DNA-binding domain
MA3_00665	5518.FGSG_06698P0	4.6e-11	Nectriaceae
MA3_00666	223192.XP_007916046.1	1.2e-37	Sordariomycetes	ko:K17784					Component of the MICOS complex, a large protein complex of the mitochondrial inner membrane that plays crucial roles in the maintenance of crista junctions, inner membrane architecture, and formation of contact sites to the outer membrane
MA3_00667	140110.NechaP38720	0	Nectriaceae	ko:K14862					Urb2/Npa2 family
MA3_00668	29875.EHK15569	3.4e-140	Hypocreaceae	ko:K00039,ko:K04708	ko00040, ko00600, ko01100, map00040, map00600, map01100	M00094,M00099	R01895, R02978	RC00089, RC00102	Enoyl-(Acyl carrier protein) reductase
MA3_00669	140110.NechaP38628	0	Nectriaceae						NRDE-2, necessary for RNA interference
MA3_00670	5507.FOXG_02246P0	7.1e-230	Nectriaceae						phospholipase C
MA3_00673	140110.NechaP38612	6.1e-264	Nectriaceae						Peroxisomal membrane protein Pex17
MA3_00674	117187.FVEG_05424T0	3.8e-59	Nectriaceae						Putative transmembrane protein 170
MA3_00675	5507.FOXG_02251P0	2e-107	Nectriaceae	ko:K00587	ko00900, ko01130, map00900, map01130		R04496	RC00003, RC00460	Belongs to the class VI-like SAM-binding methyltransferase superfamily. Isoprenylcysteine carboxyl methyltransferase family
MA3_00676	29875.EHK15576	6.4e-234	Hypocreaceae	ko:K11155	ko00561, ko00830, ko01100, ko04975, map00561, map00830, map01100, map04975	M00089	R02251, R02366, R02367, R08381	RC00004, RC00041	MBOAT, membrane-bound O-acyltransferase family
MA3_00677	5127.CCT66283	1.7e-172	Nectriaceae	ko:K15542	ko03015, map03015				Polyadenylation factor subunit 2
MA3_00678	140110.NechaP37866	1.4e-142	Nectriaceae	ko:K01173	ko04210, map04210				DNA/RNA non-specific endonuclease
MA3_00680	1173701.A0A066XX86	3e-189	Glomerellales						Cytochrome p450
MA3_00681	38033.XP_001223222.1	2.1e-44	Chaetomiaceae						Putative DNA-binding domain in centromere protein B, mouse jerky and transposases.
MA3_00682	72228.T5ADC7	2e-172	Hypocreales	ko:K07238					ZIP Zinc transporter
MA3_00683	140110.NechaP38592	8.8e-196	Nectriaceae	ko:K09191					C2H2-type zinc finger
MA3_00684	5518.FGSG_06683P0	5.9e-50	Nectriaceae	ko:K03014	ko00230, ko00240, ko01100, ko03020, ko04623, ko05016, ko05169, map00230, map00240, map01100, map03020, map04623, map05016, map05169	M00180,M00181,M00182	R00435, R00441, R00442, R00443	RC02795	DNA-directed RNA polymerase I
MA3_00685	710243.XP_007597702.1	1.2e-85	Glomerellales	ko:K00505	ko00350, ko00950, ko00965, ko01100, ko01110, ko04916, map00350, map00950, map00965, map01100, map01110, map04916	M00042	R00731, R02078, R02363, R02383, R04693, R04884	RC00046, RC00150, RC00180	Tyrosinase central domain-containing protein
MA3_00686	140110.NechaP106063	3e-50	Nectriaceae
MA3_00687	140110.NechaP102591	6.5e-143	Nectriaceae	ko:K01070	ko00680, ko01120, ko01200, map00680, map01120, map01200		R00527	RC00167, RC00320	Serine hydrolase involved in the detoxification of formaldehyde
MA3_00688	5507.FOXG_02260P0	0	Nectriaceae						Docking domain of Afi1 for Arf3 in vesicle trafficking
MA3_00689	140110.NechaP100230	1.1e-92	Nectriaceae						EF hand
MA3_00690	117187.FVEG_05437T0	4.8e-208	Nectriaceae	ko:K09527					Tetratricopeptide repeat
MA3_00691	101028.EKJ78108	2.1e-62	Nectriaceae	ko:K15151					Transcription factor subunit Med10 of Mediator complex
MA3_00694	140110.NechaP98099	1.5e-14	Nectriaceae						Transposase IS4
MA3_00697	5518.FGSG_06675P0	2.7e-186	Nectriaceae	ko:K00052	ko00290, ko00660, ko01100, ko01110, ko01210, ko01230, map00290, map00660, map01100, map01110, map01210, map01230	M00432,M00535	R00994, R04426, R10052	RC00084, RC00417, RC03036	Belongs to the isocitrate and isopropylmalate dehydrogenases family
MA3_00700	140110.NechaP37819	1.9e-167	Nectriaceae						Phd finger domain protein
MA3_00705	710243.XP_007601079.1	3.7e-239	Glomerellales						Domain of unknown function (DUF4451)
MA3_00708	140110.NechaP100235	2e-39	Nectriaceae
MA3_00710	140110.NechaP92958	4.5e-19	Nectriaceae						Uncharacterized protein conserved in bacteria (DUF2236)
MA3_00713	568076.XP_007822245.1	1.1e-121	Clavicipitaceae	ko:K13509	ko00561, ko00564, ko01100, ko01110, ko04072, ko04975, map00561, map00564, map01100, map01110, map04072, map04975	M00089	R02241, R09381	RC00004, RC00037, RC00039	Belongs to the 1-acyl-sn-glycerol-3-phosphate acyltransferase family
MA3_00714	5518.FGSG_06643P0	8.1e-247	Nectriaceae						Uncharacterized conserved protein (DUF2347)
MA3_00715	140110.NechaP38303	0	Nectriaceae	ko:K09540	ko03060, ko04141, map03060, map04141				posttranslational protein targeting to membrane, translocation
MA3_00716	5127.CCT66324	0	Nectriaceae						Lipid hydrolase
MA3_00717	140110.NechaP102593	1e-104	Nectriaceae	ko:K07953	ko04141, ko05134, map04141, map05134	M00404			Belongs to the small GTPase superfamily. SAR1 family
MA3_00719	140110.NechaP68711	4e-152	Nectriaceae						Protein of unknown function (DUF2457)
MA3_00722	53485.EFQ87543	1.4e-141	Pleosporales						Fungal specific transcription factor domain
MA3_00724	140110.NechaP95845	5e-237	Nectriaceae	ko:K08141					Belongs to the major facilitator superfamily. Sugar transporter (TC 2.A.1.1) family
MA3_00726	393283.XP_007830445.1	6.1e-35	Sordariomycetes						Phosphotransferase enzyme family
MA3_00728	710243.XP_007598094.1	3.9e-143	Glomerellales						NmrA-like family
MA3_00729	710243.XP_007598095.1	8.1e-173	Glomerellales						Cytochrome p-450
MA3_00730	710243.XP_007598095.1	6.3e-64	Glomerellales						Cytochrome p-450
MA3_00732	474922.ELA33392	5.2e-42	Glomerellales						Asparagine synthase
MA3_00733	80884.CCF36131	2.3e-60	Glomerellales	ko:K01953	ko00250, ko01100, ko01110, map00250, map01100, map01110		R00578	RC00010	Asparagine synthase
MA3_00734	101028.EKJ78136	3.5e-104	Eukaryota						proton-transporting ATP synthase activity, rotational mechanism
MA3_00737	5059.CADAFLAP00004709	3.2e-226	Ascomycota	ko:K03927	ko00983, map00983		R08220, R08255, R08258	RC00041, RC00475, RC00476, RC02264	Carboxylesterase family
MA3_00739	33178.CADATEAP00002123	2.7e-46	Eurotiomycetes						Major Facilitator Superfamily
MA3_00740	5507.FOXG_07482P0	3.6e-72	Nectriaceae	ko:K00015	ko00630, ko01100, ko01110, ko01120, map00630, map01100, map01110, map01120		R00717, R01388	RC00031, RC00042	Belongs to the D-isomer specific 2-hydroxyacid dehydrogenase family
MA3_00741	568076.XP_007822255.1	4.1e-223	Hypocreales	ko:K00128,ko:K00129	ko00010, ko00053, ko00071, ko00280, ko00310, ko00330, ko00340, ko00350, ko00360, ko00380, ko00410, ko00561, ko00620, ko00625, ko00903, ko00980, ko00981, ko00982, ko01100, ko01110, ko01120, ko01130, ko05204, map00010, map00053, map00071, map00280, map00310, map00330, map00340, map00350, map00360, map00380, map00410, map00561, map00620, map00625, map00903, map00980, map00981, map00982, map01100, ma…	M00135	R00264, R00631, R00710, R00711, R00904, R01752, R01986, R02536, R02537, R02549, R02678, R02695, R02697, R02940, R02957, R03283, R03300, R03302, R03869, R04065, R04506, R04882, R04883, R04888, R04889, R04891, R04892, R04903, R04996, R05050, R05237, R05238, R05286, R06366, R07104, R08146, R08282, R08283, R08307	RC00047, RC00071, RC00080, RC00186, RC00218, RC00242, RC00816, RC01500, RC01735	Belongs to the aldehyde dehydrogenase family
MA3_00743	140110.NechaP92972	1.4e-91	Nectriaceae
MA3_00748	92637.XP_007806754.1	4.7e-114	Clavicipitaceae						SMP-30/Gluconolaconase/LRE-like region
MA3_00750	140110.NechaP104225	1.3e-257	Nectriaceae
MA3_00751	710243.XP_007598319.1	7.8e-122	Glomerellales						negative regulation of septation initiation signaling
MA3_00752	63577.G9P670	1.3e-15	Hypocreaceae						negative regulation of septation initiation signaling
MA3_00755	568076.XP_007822258.1	3e-255	Clavicipitaceae						zinc finger
MA3_00756	101028.EKJ78130	1.7e-19	Nectriaceae						Whi5 like
MA3_00757	140110.NechaP38334	4e-252	Nectriaceae	ko:K01267					Belongs to the peptidase M18 family
MA3_00758	140110.NechaP79446	3.1e-119	Nectriaceae						RTA1 like protein
MA3_00765	140110.NechaP100240	0	Nectriaceae	ko:K14288	ko03013, map03013				Exportin 1-like protein
MA3_00767	5507.FOXG_02281P0	0	Nectriaceae						Tetratricopeptide repeat
MA3_00768	5127.CCT66308	1.4e-47	Nectriaceae	ko:K14828					rRNA processing/ribosome biogenesis
MA3_00769	5127.CCT66308	7.4e-208	Nectriaceae	ko:K14828					rRNA processing/ribosome biogenesis
MA3_00770	5518.FGSG_06662P0	1.1e-73	Nectriaceae						Domain with 2 conserved Trp (W) residues
MA3_00771	140110.NechaP38694	5.4e-124	Nectriaceae						Glycosyl hydrolases family 16
MA3_00774	140110.NechaP60448	2.1e-137	Nectriaceae						basic region leucin zipper
MA3_00779	140110.NechaP100238	5e-160	Nectriaceae
MA3_00780	117187.FVEG_05449T0	1.8e-67	Nectriaceae	ko:K13199					Stm1
MA3_00782	140110.NechaP92960	3.1e-240	Nectriaceae						Major Facilitator Superfamily
MA3_00783	140110.NechaP60471	0	Nectriaceae						Domain of unknown function (DUF4045)
MA3_00784	140110.NechaP68723	7.9e-94	Nectriaceae	ko:K07943					Belongs to the small GTPase superfamily. Arf family
MA3_00785	140110.NechaP79465	3.1e-76	Nectriaceae
MA3_00787	5127.CCT66332	4.1e-155	Nectriaceae						to mitochondrial cation transporter
MA3_00789	140110.NechaP60475	3.3e-292	Nectriaceae	ko:K08287					to protein kinase lkh1
MA3_00790	140110.NechaP79466	6.5e-34	Nectriaceae
MA3_00791	140110.NechaP38069	0	Nectriaceae	ko:K00784	ko03013, map03013				tRNase Z endonuclease
MA3_00792	140110.NechaP68730	2e-123	Nectriaceae						Flavin reductase like domain
MA3_00793	140110.NechaP68732	3.5e-189	Nectriaceae	ko:K01120	ko00230, map00230		R00191, R01234	RC00296	cAMP phosphodiesterases class-II
MA3_00794	51453.EGR48532	2.6e-71	Hypocreaceae
MA3_00797	5127.CCT66337	0	Nectriaceae						AMP-binding enzyme
MA3_00798	140110.NechaP53291	3.6e-42	Nectriaceae						Transmembrane alpha-helix domain-containing protein
MA3_00799	140110.NechaP100257	6.7e-276	Nectriaceae						Uncharacterized conserved protein (DUF2183)
MA3_00800	5127.CCT66340	2.2e-241	Nectriaceae	ko:K13181					Belongs to the DEAD box helicase family
MA3_00801	117187.FVEG_05494T0	1e-96	Nectriaceae	ko:K10436					EB1-like C-terminal motif
MA3_00803	140110.NechaP92992	4.1e-150	Nectriaceae	ko:K08502	ko04130, ko04138, map04130, map04138				PhoX homologous domain, present in p47phox and p40phox.
MA3_00804	80884.CCF36385	3.9e-118	Glomerellales
MA3_00805	5127.CCT70889	9.7e-306	Nectriaceae	ko:K00833,ko:K19562	ko00780, ko01100, map00780, map01100	M00123,M00573,M00577	R03182, R03231	RC00006, RC00868, RC00887	Bifunctional dethiobiotin synthetase adenosylmethionine-8-amino-7-oxononanoate aminotransferase
MA3_00806	117187.FVEG_00334T0	3.6e-190	Nectriaceae	ko:K01012	ko00780, ko01100, map00780, map01100	M00123,M00573,M00577	R01078	RC00441	biotin synthase
MA3_00807	474922.ELA32927	8.9e-158	Glomerellales	ko:K00652	ko00780, ko01100, map00780, map01100	M00123,M00573,M00577	R03210, R10124	RC00004, RC00039, RC02725	8-amino-7-oxononanoate synthase
MA3_00808	5147.XP_003343927.1	4e-88	Sordariaceae						Pectate lyase
MA3_00809	117187.FVEG_05502T0	9.3e-29	Nectriaceae
MA3_00810	140110.NechaP39290	0	Nectriaceae	ko:K05349	ko00460, ko00500, ko00940, ko01100, ko01110, map00460, map00500, map00940, map01100, map01110		R00026, R02558, R02887, R02985, R03527, R04949, R04998, R10035, R10039, R10040	RC00049, RC00059, RC00171, RC00262, RC00397, RC00451, RC00714, RC00746, RC01248	Belongs to the glycosyl hydrolase 3 family
MA3_00812	140110.NechaP100268	3.9e-173	Nectriaceae	ko:K00222	ko00100, ko01100, ko01110, ko01130, map00100, map01100, map01110, map01130	M00101	R05639, R07483	RC01441	Ergosterol biosynthesis ERG4/ERG24 family
MA3_00813	72228.T5ABN1	1.4e-100	Hypocreales	ko:K10089	ko04142, ko04145, map04142, map04145				Vacuolar sorting receptor (Mrl1)
MA3_00816	5465.ENH87336	8.2e-35	Glomerellales
MA3_00817	117187.FVEG_05517T0	9.6e-125	Nectriaceae	ko:K00988	ko00230, map00230		R00126, R01618	RC00002, RC02753, RC02795	ATP adenylyltransferase
MA3_00818	5127.CCT66361	3.9e-131	Nectriaceae	ko:K00988	ko00230, map00230		R00126, R01618	RC00002, RC02753, RC02795	Inositol phospholipid synthesis and fat-storage-inducing TM
MA3_00821	140110.NechaP106067	0	Nectriaceae	ko:K01210	ko00500, map00500		R00308, R03115	RC00467	to glucan 1,3-beta-glucosidase GLUC78 precursor
MA3_00822	140110.NechaP100263	8e-193	Nectriaceae	ko:K03362	ko04114, ko04120, ko04218, ko04310, ko04340, ko04341, ko04390, ko04624, ko04710, ko05131, map04114, map04120, map04218, map04310, map04340, map04341, map04390, map04624, map04710, map05131	M00380			A Receptor for Ubiquitination Targets
MA3_00824	5127.CCT66356	1.3e-63	Nectriaceae
MA3_00825	5507.FOXG_02330P0	1.6e-183	Nectriaceae	ko:K00002	ko00010, ko00040, ko00561, ko00930, ko01100, ko01110, ko01120, ko01130, ko01220, map00010, map00040, map00561, map00930, map01100, map01110, map01120, map01130, map01220	M00014	R00746, R01041, R01481, R05231	RC00087, RC00088, RC00099, RC00108	Alcohol dehydrogenase GroES-like domain
MA3_00826	140110.NechaP79503	4.7e-116	Nectriaceae						WD40 repeats
MA3_00827	310453.XP_007588273.1	2.9e-49	Ascomycota
MA3_00828	140110.NechaP93011	4.9e-31	Nectriaceae						structural constituent of cell wall
MA3_00829	31870.EFQ33107	2.2e-186	Glomerellales						Alpha-ketoglutarate dependent xanthine dioxygenase
MA3_00833	35725.K2SR09	2.9e-276	Ascomycota						Major Facilitator Superfamily
MA3_00834	140110.NechaP52144	2.5e-158	Nectriaceae
MA3_00836	43228.XP_007732049.1	4.7e-38	Eurotiomycetes
MA3_00837	35720.XP_003652976.1	6.6e-30	Ascomycota						Amidohydrolase family
MA3_00838	35720.XP_003652976.1	6.8e-47	Ascomycota						Amidohydrolase family
MA3_00839	140110.NechaP105955	2.6e-180	Nectriaceae	ko:K01183	ko00520, ko01100, map00520, map01100		R01206, R02334	RC00467	Glycosyl hydrolases family 18
MA3_00841	117187.FVEG_01632T0	3e-15	Nectriaceae						transferase activity, transferring one-carbon groups
MA3_00842	5127.CCT66378	4.1e-163	Nectriaceae						Alcohol dehydrogenase GroES-like domain
MA3_00844	51453.EGR49726	2.8e-41	Hypocreaceae
MA3_00845	5127.CCT66377	8e-145	Nectriaceae						Uncharacterised protein family UPF0052
MA3_00846	5507.FOXG_02352P0	1.3e-25	Nectriaceae
MA3_00847	140110.NechaP39473	8e-69	Nectriaceae						Conserved hypothetical protein
MA3_00849	63577.G9P6Q9	1.4e-72	Hypocreaceae						Bacterial protein of unknown function (DUF924)
MA3_00850	5465.ENH87098	2e-73	Glomerellales
MA3_00851	140110.NechaP79537	1.5e-188	Nectriaceae						Rdx family
MA3_00853	140110.NechaP93018	1.1e-247	Nectriaceae	ko:K10426	ko04962, ko05016, map04962, map05016				dynactin arp1 p62 subunit RO-2
MA3_00854	140110.NechaP100270	3.8e-97	Nectriaceae	ko:K02993	ko03010, map03010	M00177			Belongs to the eukaryotic ribosomal protein eS7 family
MA3_00855	140110.NechaP60521	8.6e-152	Nectriaceae	ko:K08870					Actin depolymerisation factor/cofilin -like domains
MA3_00856	5127.CCT66410	3.4e-164	Nectriaceae	ko:K15100					Belongs to the mitochondrial carrier (TC 2.A.29) family
MA3_00857	101028.EKJ78208	1.7e-232	Nectriaceae	ko:K10259	ko04111, ko04120, map04111, map04120	M00379			A Receptor for Ubiquitination Targets
MA3_00859	5507.FOXG_11558P0	2e-41	Nectriaceae
MA3_00860	5145.XP_001908975.1	2.6e-23	Sordariales	ko:K10706,ko:K14326	ko03013, ko03015, map03013, map03015	M00430			AAA domain
MA3_00861	140110.NechaP60536	9.3e-180	Nectriaceae						Major Facilitator Superfamily
MA3_00862	5507.FOXG_02385P0	3.3e-187	Nectriaceae	ko:K08994					domain membrane protein
MA3_00864	5059.CADAFLAP00008016	2.9e-38	Eurotiales						Amidohydrolase family
MA3_00865	162425.CADANIAP00001441	9.4e-109	Eurotiales						Amidohydrolase family
MA3_00866	162425.CADANIAP00001442	1.8e-12	Eurotiales						Fungal specific transcription factor domain
MA3_00867	393283.XP_007839635.1	7.2e-20	Sordariomycetes						Thiamine repressible genes regulatory protein thi1
MA3_00868	35720.XP_003655459.1	1.8e-29	Chaetomiaceae
MA3_00869	5518.FGSG_06574P0	8.8e-136	Nectriaceae						Protein of unknown function (DUF3431)
MA3_00870	92637.XP_007812671.1	1.9e-53	Clavicipitaceae	ko:K15140					Surfeit locus protein 5 subunit 22 of Mediator complex
MA3_00872	140110.NechaP101732	1.3e-55	Nectriaceae						NAD(P)H-binding
MA3_00873	101028.EKJ78206	1.4e-214	Nectriaceae	ko:K06173,ko:K15452					tRNA pseudouridine synthase 1
MA3_00874	5127.CCT66392	2.8e-28	Nectriaceae
MA3_00878	117187.FVEG_10565T0	7.9e-70	Nectriaceae
MA3_00879	140110.NechaP87804	3.2e-71	Nectriaceae						Protease component of the SPS-sensor system, which regulates the expression of several amino acid-metabolizing enzymes and amino acid- and peptide-permeases in response to extracellular amino acid levels by controlling the activity of two transcription factors, STP1 and STP2. Catalyzes the activation of these transcription factors, which are synthesized as latent cytoplasmic precursors, by proteo…
MA3_00880	393283.XP_007835829.1	2.6e-93	Sordariomycetes
MA3_00881	5127.CCT66453	4.9e-26	Nectriaceae						Ring finger
MA3_00882	5465.ENH87285	5e-75	Glomerellales	ko:K00472	ko00330, ko01100, map00330, map01100		R01252	RC00478	oxygenase family
MA3_00883	140110.NechaP60589	1.3e-101	Nectriaceae						BTB/POZ domain
MA3_00886	5127.CCT66482	3.1e-132	Nectriaceae						Serine aminopeptidase, S33
MA3_00887	5518.FGSG_06498P0	1.1e-125	Nectriaceae	ko:K22124					Pyridine nucleotide-disulphide oxidoreductase
MA3_00889	140110.NechaP93097	2.4e-88	Nectriaceae
MA3_00890	5127.CCT66479	1.2e-130	Nectriaceae						to isoflavone reductase
MA3_00891	710243.XP_007593881.1	1.5e-13	Glomerellales
MA3_00893	69781.S8B0P2	1.3e-39	Eurotiales						finger domain protein
MA3_00894	474922.ELA31418	1.5e-206	Glomerellales						Cytochrome p-450
MA3_00895	51453.EGR49773	6.3e-55	Hypocreaceae						Enoyl-(Acyl carrier protein) reductase
MA3_00897	140110.NechaP54501	3.5e-243	Nectriaceae						to potassium uptake transporter
MA3_00898	29850.GGTG_12123T0	6.1e-26	Sordariomycetes						Enoyl-(Acyl carrier protein) reductase
MA3_00899	140110.NechaP39337	1.4e-122	Nectriaceae						Belongs to the peptidase A1 family
MA3_00900	5127.CCT66477	1.2e-158	Nectriaceae	ko:K07178	ko03008, map03008				Belongs to the protein kinase superfamily. RIO-type Ser Thr kinase family
MA3_00901	140110.NechaP104278	0	Nectriaceae						Fungal specific transcription factor domain
MA3_00903	140110.NechaP39599	0	Nectriaceae						RNA dependent RNA polymerase
MA3_00904	140110.NechaP55960	1.9e-193	Nectriaceae						bnr asp-box repeat domain protein
MA3_00906	29875.EHK15308	5.9e-178	Hypocreaceae						Arylsulfotransferase (ASST)
MA3_00910	140110.NechaP68854	0	Nectriaceae						Nonribosomal peptide synthetase 10
MA3_00913	5145.XP_001912166.1	3.4e-59	Sordariales						Domain of unknown function (DUF1996)
MA3_00914	140110.NechaP39564	7.5e-214	Nectriaceae	ko:K16261					Amino acid permease
MA3_00915	5507.FOXG_02460P0	2.4e-234	Nectriaceae						Belongs to the CTL (choline transporter-like) family
MA3_00916	140110.NechaP39442	2.6e-174	Nectriaceae	ko:K08329	ko04138, map04138				Autophagy protein Apg17
MA3_00917	5127.CCT66467	0	Nectriaceae						Belongs to the peptidase C2 family
MA3_00920	140110.NechaP79631	1.2e-169	Nectriaceae	ko:K07241					Belongs to the NiCoT transporter (TC 2.A.52) family
MA3_00921	31870.EFQ32296	3.5e-45	Glomerellales						Stress responsive A B barrel
MA3_00922	140110.NechaP79623	3.1e-51	Nectriaceae						Malate/L-lactate dehydrogenase
MA3_00923	710243.XP_007603171.1	1.8e-14	Glomerellales						Fungal specific transcription factor domain
MA3_00924	140110.NechaP93076	1.2e-183	Nectriaceae						Fungal specific transcription factor domain
MA3_00925	140110.NechaP39608	4.8e-56	Nectriaceae	ko:K17362					Thioesterase superfamily
MA3_00926	140110.NechaP85473	1.2e-214	Nectriaceae	ko:K09241					GAL4-like Zn(II)2Cys6 (or C6 zinc) binuclear cluster DNA-binding domain
MA3_00927	474922.ELA33085	6.5e-132	Glomerellales	ko:K17742	ko00051, map00051		R07346	RC00102	Enoyl-(Acyl carrier protein) reductase
MA3_00928	5127.CCT72700	2e-62	Nectriaceae						Kinase-related protein
MA3_00929	5059.CADAFLAP00011355	1.1e-124	Eurotiales						Oxidoreductase, short chain dehydrogenase reductase family
MA3_00930	27337.EGY22145	5.6e-35	Glomerellales						CFEM domain-containing protein
MA3_00931	140110.NechaP52249	1.2e-109	Nectriaceae						Glyoxalase-like domain
MA3_00932	5127.CCT66458	9.4e-13	Nectriaceae						Ring finger
MA3_00933	80884.CCF46110	2.6e-130	Glomerellales						Taurine catabolism dioxygenase TauD, TfdA family
MA3_00935	140110.NechaP78039	1e-40	Nectriaceae
MA3_00936	140110.NechaP60585	9.4e-233	Nectriaceae	ko:K01264					Belongs to the peptidase M28 family
MA3_00937	92637.XP_007809672.1	1.1e-161	Clavicipitaceae	ko:K11429	ko00310, map00310		R03875, R03938, R04866, R04867	RC00003, RC00060, RC00181, RC00496	Histone-lysine N-methyltransferase
MA3_00938	140110.NechaP60582	3.6e-64	Nectriaceae						Belongs to the universal ribosomal protein uL14 family
MA3_00939	140110.NechaP68831	8.6e-66	Sordariomycetes	ko:K03017	ko00230, ko00240, ko01100, ko03020, ko05016, ko05169, map00230, map00240, map01100, map03020, map05016, map05169	M00180	R00435, R00441, R00442, R00443	RC02795	DNA-dependent RNA polymerase catalyzes the transcription of DNA into RNA using the four ribonucleoside triphosphates as substrates
MA3_00940	568076.XP_007823299.1	1.2e-86	Clavicipitaceae	ko:K09578	ko04622, map04622				PPIC-type PPIASE domain
MA3_00941	140110.NechaP93066	2.6e-170	Nectriaceae						LrgB-like family
MA3_00942	5507.FOXG_02426P0	3.9e-165	Nectriaceae
MA3_00943	78579.XP_003662579.1	3.5e-101	Chaetomiaceae	ko:K00953	ko00740, ko01100, ko01110, map00740, map01100, map01110	M00125	R00161	RC00002	Phosphoadenosine phosphosulfate reductase family
MA3_00944	1182553.XP_007746558.1	0	Chaetothyriomycetidae
MA3_00945	80884.CCF42626	1.5e-212	Glomerellales						sugar transporter
MA3_00947	5145.XP_003437346.1	1.4e-155	Sordariales	ko:K15109	ko04714, map04714				Belongs to the mitochondrial carrier (TC 2.A.29) family
MA3_00948	140110.NechaP91178	7.3e-220	Nectriaceae						Phosphoglycerate mutase family
MA3_00950	117187.FVEG_04184T0	2.1e-192	Nectriaceae	ko:K05290	ko00563, ko01100, map00563, map01100				GPI-anchor transamidase
MA3_00951	5518.FGSG_09636P0	1e-261	Nectriaceae						Transcription factor IIIC subunit delta N-term
MA3_00952	140110.NechaP76623	1.2e-54	Nectriaceae
MA3_00953	117187.FVEG_04181T0	3e-77	Nectriaceae						Src homology 3 domains
MA3_00955	140110.NechaP91175	7.7e-34	Sordariomycetes						Protein of unknown function (DUF1295)
MA3_00956	140110.NechaP66609	4.1e-223	Nectriaceae	ko:K18798					AFG1-like ATPase
MA3_00957	101028.EKJ73942	1.2e-55	Nectriaceae						extracellular serine-rich protein
MA3_00959	140110.NechaP27378	2.3e-51	Nectriaceae						Zinc finger, C3HC4 type (RING finger)
MA3_00962	140110.NechaP91173	3.6e-55	Nectriaceae
MA3_00964	5518.FGSG_09619P0	3.4e-196	Nectriaceae	ko:K15423	ko04922, map04922				Serine threonine-protein phosphatase
MA3_00965	5507.FOXG_06325P0	2.2e-44	Nectriaceae	ko:K18174
MA3_00967	140110.NechaP66606	4.1e-153	Nectriaceae						Saccharomyces cerevisiae YDL133W
MA3_00969	5127.CCT64302	0	Nectriaceae	ko:K03347	ko04110, ko04111, ko04114, ko04120, ko04141, ko04310, ko04340, ko04341, ko04350, ko04710, ko05168, ko05200, map04110, map04111, map04114, map04120, map04141, map04310, map04340, map04341, map04350, map04710, map05168, map05200	M00379,M00380,M00381,M00382,M00387,M00407,M00411			Belongs to the cullin family
MA3_00970	140110.NechaP66601	6e-311	Nectriaceae						Transport protein Avl9
MA3_00975	101028.EKJ73933	1.4e-190	Nectriaceae	ko:K04630,ko:K04640	ko04015, ko04022, ko04024, ko04062, ko04071, ko04261, ko04360, ko04371, ko04540, ko04611, ko04670, ko04713, ko04723, ko04724, ko04725, ko04726, ko04727, ko04728, ko04730, ko04914, ko04915, ko04916, ko04921, ko04923, ko04924, ko04926, ko04934, ko04971, ko05012, ko05030, ko05032, ko05034, ko05133, ko05142, ko05145, ko05200, map04015, map04022, map04024, map04062, map04071, map04261, map04360, map04…	M00695			guanine nucleotide-binding protein
MA3_00978	140110.NechaP105919	3.9e-146	Nectriaceae	ko:K05528,ko:K05534	ko00513, ko01100, map00513, map01100	M00074	R08599		to alpha-1,6-mannosyltransferase subunit Och1
MA3_00983	5507.FOXG_06112P0	9.7e-98	Nectriaceae						Protein of unknown function (DUF3237)
MA3_00984	140110.NechaP76695	4.3e-49	Nectriaceae	ko:K14526	ko03008, ko03013, map03008, map03013				Rpp20 subunit of nuclear RNase MRP and P
MA3_00985	140110.NechaP58425	1.4e-133	Nectriaceae						Rogdi leucine zipper containing protein
MA3_00986	140110.NechaP66669	1.4e-163	Nectriaceae						NIPSNAP
MA3_00987	5127.CCT64492	3.2e-23	Nectriaceae	ko:K02142	ko00190, ko01100, map00190, map01100	M00158			ATP synthase j chain
MA3_00988	140110.NechaP34374	7e-108	Nectriaceae	ko:K00287	ko00670, ko00790, ko01100, ko01523, map00670, map00790, map01100, map01523	M00126,M00840	R00936, R00937, R00939, R00940, R02235, R02236, R11765	RC00109, RC00110, RC00158	Serine hydrolase (FSH1)
MA3_00989	140110.NechaP103516	4.3e-196	Nectriaceae	ko:K03035	ko03050, ko05169, map03050, map05169	M00341			proteasome regulatory
MA3_00991	9767.XP_007190091.1	1.9e-08	Cetartiodactyla						Ankyrin repeat and SOCS box
MA3_00992	38033.XP_001227313.1	1e-09	Chaetomiaceae						Ankyrin repeat
MA3_00993	29875.EHK18925	9.3e-37	Hypocreaceae
MA3_00994	5127.CCT64489	4.6e-61	Nectriaceae	ko:K11572					Spc19
MA3_00996	140110.NechaP91233	2.9e-128	Nectriaceae	ko:K11246	ko04011, map04011				Plasma membrane osmosensor that activates the high osmolarity glycerol (HOG) MAPK signaling pathway in response to high osmolarity
MA3_00997	140110.NechaP102443	2.5e-59	Nectriaceae						Dynactin subunit p22
MA3_00998	5507.FOXG_06122P0	2.8e-216	Nectriaceae						Transmembrane amino acid transporter protein
MA3_00999	140110.NechaP66677	1.2e-52	Nectriaceae	ko:K02959	ko03010, map03010	M00178			ribosomal protein S16
MA3_01000	5507.FOXG_06124P0	5.8e-113	Nectriaceae	ko:K17759					Catalyzes the epimerization of the S- and R-forms of NAD(P)HX, a damaged form of NAD(P)H that is a result of enzymatic or heat-dependent hydration. This is a prerequisite for the S- specific NAD(P)H-hydrate dehydratase to allow the repair of both epimers of NAD(P)HX
MA3_01001	393283.XP_007833350.1	7.2e-11	Sordariomycetes
MA3_01002	393283.XP_007836813.1	7.1e-07	Sordariomycetes
MA3_01003	92637.XP_007810729.1	1.1e-41	Clavicipitaceae						MYND finger
MA3_01004	78898.MVEG_08252T0	8.7e-36	Fungi						Isochorismatase family
MA3_01006	140110.NechaP86983	3.5e-245	Nectriaceae						Major Facilitator Superfamily
MA3_01008	5507.FOXG_08962P0	1.2e-167	Nectriaceae						to amino acid permease
MA3_01009	474922.ELA23427	2.7e-91	Glomerellales						O-methyltransferase
MA3_01010	80884.CCF44701	5.6e-95	Sordariomycetes	ko:K00505	ko00350, ko00950, ko00965, ko01100, ko01110, ko04916, map00350, map00950, map00965, map01100, map01110, map04916	M00042	R00731, R02078, R02363, R02383, R04693, R04884	RC00046, RC00150, RC00180	Common central domain of tyrosinase
MA3_01011	710243.XP_007601856.1	1.1e-09	Glomerellales
MA3_01015	140110.NechaP88069	1.2e-165	Eukaryota						protein serine/threonine kinase activity
MA3_01016	140110.NechaP93112	2.9e-108	Hypocreales						RTA1 like
MA3_01018	140110.NechaP79678	7.8e-26	Nectriaceae						Fungal specific transcription factor domain
MA3_01020	140110.NechaP99332	3.8e-256	Hypocreales	ko:K16261					Amino acid permease
MA3_01021	63577.G9NKU9	1.9e-30	Hypocreaceae
MA3_01022	51453.EGR49663	2.4e-183	Hypocreaceae						Major Facilitator Superfamily
MA3_01023	140110.NechaP53985	0	Nectriaceae						Belongs to the glycosyl hydrolase 31 family
MA3_01024	27337.EGY14125	4.9e-160	Glomerellales						C6 zinc finger domain-containing protein
MA3_01025	430998.XP_007674287.1	1.1e-32	Dothideomycetidae						short chain dehydrogenase
MA3_01027	140110.NechaP71444	0	Nectriaceae	ko:K01539	ko04022, ko04024, ko04260, ko04261, ko04911, ko04918, ko04919, ko04925, ko04960, ko04961, ko04964, ko04970, ko04971, ko04972, ko04973, ko04974, ko04976, ko04978, map04022, map04024, map04260, map04261, map04911, map04918, map04919, map04925, map04960, map04961, map04964, map04970, map04971, map04972, map04973, map04974, map04976, map04978				Belongs to the cation transport ATPase (P-type) (TC 3.A.3) family
MA3_01028	470704.XP_007760985.1	2.3e-145	Eurotiomycetes
MA3_01030	140110.NechaP83624	1.8e-66	Nectriaceae
MA3_01033	5507.FOXG_06138P0	4.1e-73	Nectriaceae						Thioredoxin
MA3_01034	140110.NechaP76727	1.8e-171	Nectriaceae	ko:K09142					Putative RNA methyltransferase
MA3_01035	140110.NechaP32673	0	Nectriaceae	ko:K01210	ko00500, map00500		R00308, R03115	RC00467	Pectate lyase superfamily protein
MA3_01037	140110.NechaP66689	5.8e-201	Nectriaceae	ko:K03644	ko00785, ko01100, map00785, map01100		R07767, R07768	RC01978	Catalyzes the radical-mediated insertion of two sulfur atoms into the C-6 and C-8 positions of the octanoyl moiety bound to the lipoyl domains of lipoate-dependent enzymes, thereby converting the octanoylated domains into lipoylated derivatives
MA3_01041	5127.CCT64462	8.9e-264	Nectriaceae	ko:K00589	ko00860, ko01100, ko01110, ko01120, map00860, map01100, map01110, map01120	M00121	R03194	RC00003, RC00871	to siroheme synthase
MA3_01044	51453.EGR51109	2.9e-36	Sordariomycetes						2OG-Fe(II) oxygenase superfamily
MA3_01045	117187.FVEG_04003T0	2.2e-179	Nectriaceae						Aminotransferase class I and II
MA3_01048	226899.F0XB58	1.9e-13	Ascomycota
MA3_01049	140110.NechaP11425	4.3e-231	Nectriaceae						Fungal specific transcription factor domain
MA3_01051	101028.EKJ78436	0	Nectriaceae	ko:K14293	ko03013, map03013				ribosomal protein import into nucleus
MA3_01053	710243.XP_007602439.1	2.4e-307	Glomerellales	ko:K01649	ko00290, ko00620, ko01100, ko01110, ko01210, ko01230, map00290, map00620, map01100, map01110, map01210, map01230	M00432	R01213	RC00004, RC00470, RC02754	2-isopropylmalate synthase
MA3_01055	140110.NechaP99337	1.6e-86	Nectriaceae						Glutamic acid rich protein
MA3_01057	5518.FGSG_05868P0	1e-90	Nectriaceae
MA3_01058	140110.NechaP58461	0	Nectriaceae	ko:K00850	ko00010, ko00030, ko00051, ko00052, ko00680, ko01100, ko01110, ko01120, ko01130, ko01200, ko01230, ko03018, ko04152, ko05230, map00010, map00030, map00051, map00052, map00680, map01100, map01110, map01120, map01130, map01200, map01230, map03018, map04152, map05230	M00001,M00345	R00756, R03236, R03237, R03238, R03239, R04779	RC00002, RC00017	Catalyzes the phosphorylation of D-fructose 6-phosphate to fructose 1,6-bisphosphate by ATP, the first committing step of glycolysis
MA3_01060	101028.EKJ69658	4.4e-192	Nectriaceae	ko:K15134					Subunit 17 of Mediator complex
MA3_01061	140110.NechaP105989	0	Nectriaceae						Zinc finger, C3HC4 type (RING finger)
MA3_01063	140110.NechaP77908	5.7e-306	Nectriaceae						to type I phosphodiesterase nucleotide pyrophosphatase family protein
MA3_01064	5507.FOXG_03347P0	3.9e-133	Nectriaceae						GAL4-like Zn(II)2Cys6 (or C6 zinc) binuclear cluster DNA-binding domain
MA3_01065	140110.NechaP35638	2.5e-100	Nectriaceae						NAD(P)H-binding
MA3_01067	101028.EKJ69653	1.5e-208	Nectriaceae	ko:K08257					Glycosyl hydrolase family 76
MA3_01070	474922.ELA30868	1.6e-47	Glomerellales	ko:K08513	ko04130, map04130				Synaptobrevin
MA3_01072	176275.XP_008598060.1	0	Hypocreales	ko:K12659	ko00220, ko01100, ko01110, ko01130, ko01210, ko01230, map00220, map01100, map01110, map01130, map01210, map01230	M00028	R02649, R03443	RC00002, RC00043, RC00684	Arg-6 protein
MA3_01073	140110.NechaP36280	7.2e-188	Nectriaceae						Belongs to the cytochrome P450 family
MA3_01074	140110.NechaP92338	2.3e-62	Nectriaceae						Enoyl-CoA hydratase/isomerase
MA3_01075	140110.NechaP64367	8.1e-134	Nectriaceae						Glycosyl hydrolase catalytic core
MA3_01077	140110.NechaP67600	5.6e-41	Nectriaceae
MA3_01079	474922.ELA31579	2e-115	Glomerellales						Geranylgeranyl pyrophosphate synthetase
MA3_01080	226899.F0XE42	5.1e-266	Ophiostomatales						AAA domain
MA3_01081	140110.NechaP34554	9.6e-253	Nectriaceae						FAD dependent oxidoreductase
MA3_01082	140110.NechaP51795	3.2e-53	Nectriaceae	ko:K00799,ko:K03448	ko00480, ko00980, ko00982, ko00983, ko01524, ko05200, ko05204, ko05225, ko05418, map00480, map00980, map00982, map00983, map01524, map05200, map05204, map05225, map05418		R03522, R07002, R07003, R07004, R07023, R07024, R07025, R07026, R07069, R07070, R07083, R07084, R07091, R07092, R07093, R07094, R07100, R07113, R07116, R08280, R09409, R11905	RC00004, RC00069, RC00840, RC00948, RC01704, RC01705, RC01706, RC01758, RC01759, RC01765, RC01767, RC01769, RC02243, RC02527, RC02939, RC02940, RC02942, RC02943, RC02944	Glutathione S-transferase, N-terminal domain
MA3_01083	140110.NechaP97613	4.8e-18	Nectriaceae						NAD dependent epimerase dehydratase family protein
MA3_01084	101028.EKJ67850	8.4e-84	Nectriaceae						Dienelactone hydrolase family
MA3_01085	101028.EKJ72508	8.6e-197	Nectriaceae						Zinc-dependent metalloprotease
MA3_01087	117187.FVEG_07496T0	3e-189	Nectriaceae
MA3_01089	92637.XP_007806537.1	3.7e-56	Hypocreales	ko:K14325	ko03013, ko03015, map03013, map03015	M00430			Pfam:RRM_6
MA3_01090	117187.FVEG_09638T0	1.3e-16	Nectriaceae						Histidine acid
MA3_01092	63577.G9NUP6	3e-125	Hypocreaceae						Four repeated domains in the Fasciclin I family of proteins, present in many other contexts.
MA3_01095	568076.XP_007825253.1	1.5e-219	Clavicipitaceae						Glycosyl hydrolases family 16
MA3_01098	51453.EGR46870	0	Hypocreaceae						Glycosyl transferase family 2
MA3_01099	5127.CCT70039	3.5e-240	Nectriaceae	ko:K16675,ko:K20030	ko04391, map04391				Belongs to the DHHC palmitoyltransferase family
MA3_01100	72228.T5A6U6	1.8e-55	Hypocreales
MA3_01101	5507.FOXG_03333P0	8e-218	Nectriaceae	ko:K01079	ko00260, ko00680, ko01100, ko01120, ko01130, ko01200, ko01230, map00260, map00680, map01100, map01120, map01130, map01200, map01230	M00020	R00582	RC00017	to Phosphoserine phosphatase
MA3_01104	5507.FOXG_03332P0	1.1e-143	Nectriaceae	ko:K00390	ko00920, ko01100, ko01120, map00920, map01100, map01120	M00176	R02021	RC00007, RC02862	Phosphoadenosine phosphosulfate reductase
MA3_01105	140110.NechaP36482	2.8e-118	Nectriaceae	ko:K15450					Methyltransferase TYW3
MA3_01106	140110.NechaP36501	2.5e-64	Nectriaceae	ko:K17788					Protein of Unknown function (DUF1690)
MA3_01108	140110.NechaP35958	7e-291	Nectriaceae						Ferric reductase NAD binding domain
MA3_01109	140110.NechaP67419	7.6e-253	Hypocreales						Arylsulfotransferase (ASST)
MA3_01110	5127.CCT69992	3.6e-229	Nectriaceae						to MSF drug transporter
MA3_01111	223192.XP_007919022.1	4.2e-102	Sordariomycetes						ino80 chromatin remodeling complex protein
MA3_01112	140110.NechaP77414	2.6e-236	Nectriaceae						ino80 chromatin remodeling complex protein
MA3_01113	209285.XP_006694088.1	1.4e-222	Chaetomiaceae	ko:K01951	ko00230, ko00983, ko01100, map00230, map00983, map01100	M00050	R01230, R01231, R08244	RC00010, RC00204	GMP synthase C terminal domain
MA3_01115	36651.K9F9L8	3.9e-150	Eurotiales	ko:K04835	ko00630, ko00660, ko01100, ko01200, map00630, map00660, map01100, map01200	M00740	R03696	RC00979	Methylaspartate ammonia-lyase N-terminus
MA3_01118	223192.XP_007913965.1	2.1e-259	Sordariomycetes						Allantoate permease
MA3_01121	5127.CCT72644	1.1e-56	Nectriaceae						Domain of unknown function (DUF3328)
MA3_01123	140110.NechaP91940	8.4e-187	Nectriaceae	ko:K12780,ko:K13054	ko04113, ko04114, map04113, map04114				N terminus of Rad21 / Rec8 like protein
MA3_01124	140110.NechaP77829	7e-112	Nectriaceae						Rab GDP-dissociation inhibitor activity
MA3_01125	5507.FOXG_03392P0	8.4e-153	Nectriaceae	ko:K12586	ko03018, map03018	M00391			3' exoribonuclease family, domain 1
MA3_01127	5518.FGSG_08579P0	0	Nectriaceae						Ferric reductase NAD binding domain
MA3_01128	140110.NechaP77826	5.2e-61	Nectriaceae
MA3_01129	568076.XP_007825275.1	2.8e-60	Clavicipitaceae	ko:K03635	ko00790, ko01100, ko04122, map00790, map01100, map04122		R09395	RC02507	Catalytic subunit of the molybdopterin synthase complex, a complex that catalyzes the conversion of precursor Z into molybdopterin. Acts by mediating the incorporation of 2 sulfur atoms from thiocarboxylated MOCS2A into precursor Z to generate a dithiolene group
MA3_01130	5127.CCT69984	3.8e-251	Nectriaceae	ko:K13094					G-patch domain
MA3_01131	5127.CCT69983	6.9e-142	Nectriaceae						Belongs to the peptidase A1 family
MA3_01136	140110.NechaP35246	5.9e-162	Nectriaceae	ko:K01068,ko:K11992	ko00062, ko00120, ko01040, ko01100, ko01110, ko04146, map00062, map00120, map01040, map01100, map01110, map04146	M00104	R01274, R03974, R07296, R08174, R08175, R08176, R08177, R08178, R08179, R08180, R08181, R08182, R08183, R09450	RC00004, RC00014	to acyl-CoA
MA3_01137	140110.NechaP103782	0	Nectriaceae	ko:K20456					Belongs to the OSBP family
MA3_01139	117187.FVEG_02273T0	2.1e-126	Nectriaceae	ko:K01183	ko00520, ko01100, map00520, map01100		R01206, R02334	RC00467	Glycosyl hydrolases family 18
MA3_01142	5518.FGSG_08588P0	2.9e-153	Nectriaceae	ko:K06911					Belongs to the pirin family
MA3_01143	140110.NechaP35407	2.7e-234	Nectriaceae						Protein of unknown function (DUF3433)
MA3_01144	140110.NechaP91775	1.1e-70	Nectriaceae	ko:K05747	ko04062, ko04144, ko04520, ko04530, ko04666, ko04810, ko05100, ko05130, ko05131, ko05132, ko05231, map04062, map04144, map04520, map04530, map04666, map04810, map05100, map05130, map05131, map05132, map05231
MA3_01147	5507.FOXG_03406P0	1.1e-156	Nectriaceae
MA3_01148	5507.FOXG_03407P0	3e-194	Nectriaceae						Magnesium transporter NIPA
MA3_01149	140110.NechaP58964	1.3e-101	Nectriaceae	ko:K02150	ko00190, ko01100, ko04145, ko04150, ko04721, ko04966, ko05110, ko05120, ko05323, map00190, map01100, map04145, map04150, map04721, map04966, map05110, map05120, map05323	M00160			Vacuolar ATP synthase subunit E
MA3_01150	140110.NechaP36021	2.4e-187	Nectriaceae
MA3_01152	5507.FOXG_03410P0	0	Nectriaceae	ko:K01509,ko:K01530,ko:K01537	ko00230, ko04742, map00230, map04742		R00086	RC00002	Belongs to the cation transport ATPase (P-type) (TC 3.A.3) family. Type IV subfamily
MA3_01153	140110.NechaP36647	1.5e-282	Nectriaceae						Belongs to the aldehyde dehydrogenase family
MA3_01154	5518.FGSG_08597P0	5.9e-239	Nectriaceae	ko:K11594	ko04622, ko05161, ko05203, map04622, map05161, map05203				Belongs to the DEAD box helicase family
MA3_01155	5127.CCT69966	7.8e-159	Nectriaceae	ko:K14827					Rix1 complex component involved in 60S ribosome maturation
MA3_01156	101028.EKJ71939	5.8e-49	Nectriaceae	ko:K10419					Roadblock/LC7 domain
MA3_01158	140110.NechaP58970	0	Nectriaceae
MA3_01159	101028.EKJ71941	4.1e-43	Nectriaceae						Uncharacterised protein family (UPF0139)
MA3_01160	5127.CCT70754	7.4e-11	Nectriaceae
MA3_01161	5507.FOXG_03298P0	2e-102	Nectriaceae						Ribosomal protein s17
MA3_01162	92637.XP_007807188.1	6.1e-140	Clavicipitaceae						S1/P1 Nuclease
MA3_01163	5127.CCT70074	2.4e-138	Nectriaceae						Repeated motif present between transmembrane helices in cystinosin, yeast ERS1p, mannose-P-dolichol utilization defect 1, and other hypothetical proteins.
MA3_01164	29875.EHK23966	2.5e-184	Hypocreaceae	ko:K00133	ko00260, ko00261, ko00270, ko00300, ko01100, ko01110, ko01120, ko01130, ko01210, ko01230, map00260, map00261, map00270, map00300, map01100, map01110, map01120, map01130, map01210, map01230	M00016,M00017,M00018,M00033,M00525,M00526,M00527	R02291	RC00684	Semialdehyde dehydrogenase, NAD binding domain
MA3_01166	5507.FOXG_03309P0	5.3e-78	Nectriaceae
MA3_01169	101028.EKJ74056	2.6e-121	Nectriaceae						Etoposide-induced protein 2.4 (EI24)
MA3_01170	140110.NechaP91793	1.7e-182	Nectriaceae						Lanthionine synthetase C-like protein
MA3_01172	5127.CCT70069	2.9e-139	Nectriaceae						Conserved hypothetical protein
MA3_01175	63577.G9NY78	1.7e-73	Hypocreaceae
MA3_01176	117187.FVEG_02171T0	2.5e-61	Nectriaceae
MA3_01178	568076.XP_007823585.1	8.3e-193	Clavicipitaceae						zinc-RING finger domain
MA3_01179	148304.MAPG_10746T0	2.6e-52	Magnaporthales						Pfam:DUF718
MA3_01181	140110.NechaP35748	3.2e-239	Nectriaceae						Epidermal growth factor-like domain.
MA3_01183	140110.NechaP91797	3.5e-297	Nectriaceae	ko:K01969	ko00280, ko01100, map00280, map01100	M00036	R04138	RC00367, RC00942	carboxylase beta chain, mitochondrial precursor
MA3_01184	140110.NechaP103716	1.5e-215	Nectriaceae	ko:K00253	ko00280, ko01100, map00280, map01100	M00036	R04095	RC00246	isovaleryl-CoA dehydrogenase, mitochondrial precursor
MA3_01186	140110.NechaP58988	2.6e-170	Nectriaceae						to D-arabinitol
MA3_01190	140110.NechaP91799	2.4e-114	Nectriaceae
MA3_01191	5507.FOXG_03316P0	1.5e-251	Nectriaceae						structural constituent of cell wall
MA3_01193	140110.NechaP58991	3.1e-130	Nectriaceae
MA3_01195	140110.NechaP2224	2.5e-144	Nectriaceae						Ubiquitin-interacting motif.
MA3_01196	92637.XP_007807166.1	4.5e-135	Clavicipitaceae	ko:K19828					50S ribosome-binding GTPase
MA3_01197	5507.FOXG_03320P0	4.6e-263	Nectriaceae						HCO3- transporter family
MA3_01198	140110.NechaP58992	4.5e-15	Nectriaceae
MA3_01200	101028.EKJ69634	2e-104	Nectriaceae	ko:K07512	ko00062, ko01100, ko01212, map00062, map01100, map01212	M00085	R01278, R03776, R03856, R03989, R04753, R06985, R07162	RC00052	to mitochondrial enoyl reductase
MA3_01201	117187.FVEG_01961T0	1.4e-197	Nectriaceae	ko:K02515,ko:K06668,ko:K18680	ko04011, ko04111, map04011, map04111				Fungal kinase associated-1 domain
MA3_01202	140110.NechaP91959	2.2e-193	Nectriaceae	ko:K02515,ko:K06668,ko:K18680	ko04011, ko04111, map04011, map04111				Fungal kinase associated-1 domain
MA3_01204	140110.NechaP35375	4.4e-109	Nectriaceae						Phosphotransferase enzyme family
MA3_01205	5039.XP_002620708.1	6e-54	Eurotiomycetes
MA3_01206	92637.XP_007809204.1	1.4e-63	Ascomycota						Protein tyrosine kinase
MA3_01209	117187.FVEG_11872T0	3e-90	Nectriaceae						Heterokaryon incompatibility protein (HET)
MA3_01210	710243.XP_007593342.1	2.3e-111	Glomerellales						Heat-labile enterotoxin alpha chain
MA3_01212	568076.XP_007825377.1	1.6e-117	Hypocreales	ko:K10777	ko03450, map03450		R00381	RC00005	DNA ligase N terminus
MA3_01213	140110.NechaP48724	2.2e-127	Nectriaceae	ko:K10777	ko03450, map03450		R00381	RC00005	DNA ligase N terminus
MA3_01214	140110.NechaP48897	1.6e-172	Nectriaceae						Belongs to the iron ascorbate-dependent oxidoreductase family
MA3_01216	5127.CCT65863	0	Nectriaceae						Temperature dependent protein affecting M2 dsRNA replication
MA3_01219	140110.NechaP48575	6.6e-120	Nectriaceae						Ferritin-like domain
MA3_01222	5127.CCT65865	0	Nectriaceae	ko:K18748					to cell wall biogenesis protein phosphatase Ssd1
MA3_01224	117187.FVEG_08173T0	4.1e-175	Nectriaceae	ko:K18723					GLE1-like protein
MA3_01225	140110.NechaP71909	1.1e-90	Nectriaceae	ko:K08498,ko:K08499	ko04130, map04130				Syntaxin 6, N-terminal
MA3_01226	140110.NechaP96261	7.6e-279	Nectriaceae						Methyltransferase domain
MA3_01228	5507.FOXG_01802P0	5.8e-158	Nectriaceae						ACT domain
MA3_01230	140110.NechaP71913	0	Nectriaceae	ko:K02145	ko00190, ko01100, ko04145, ko04150, ko04721, ko04966, ko05110, ko05120, ko05323, map00190, map01100, map04145, map04150, map04721, map04966, map05110, map05120, map05323	M00160			Vacuolar ATP synthase catalytic subunit A
MA3_01231	51453.EGR49554	3.9e-236	Hypocreaceae	ko:K12350	ko00600, ko01100, ko04071, ko04142, ko04217, map00600, map01100, map04071, map04142, map04217		R02541	RC00017, RC00425	Converts sphingomyelin to ceramide
MA3_01232	140110.NechaP75891	2.9e-132	Nectriaceae
MA3_01233	5127.CCT67687	8.9e-244	Nectriaceae						Domain of unknown function (DUF4387)
MA3_01234	97096.XP_007789664.1	1.4e-173	Sordariomycetes						Sugar (and other) transporter
MA3_01235	101028.EKJ77147	4.7e-231	Nectriaceae						Mitochondrial protein Pet127
MA3_01236	140110.NechaP48617	0	Nectriaceae						Dyggve-Melchior-Clausen syndrome protein
MA3_01237	140110.NechaP84853	0	Nectriaceae	ko:K01262,ko:K06111					Vacuolar-sorting protein 54, of GARP complex
MA3_01239	5507.FOXG_01811P0	6.6e-226	Nectriaceae						Glucan synthesis regulatory protein
MA3_01247	474922.ELA24091	2.3e-38	Glomerellales						Life-span regulatory factor
MA3_01251	140110.NechaP78827	3.2e-17	Nectriaceae
MA3_01252	568076.XP_007825002.1	2.2e-293	Clavicipitaceae	ko:K09495					assists the folding of proteins upon ATP hydrolysis
MA3_01253	29875.EHK15453	7.6e-37	Hypocreaceae						Protein of unknown function (DUF1168)
MA3_01255	92637.XP_007811936.1	6.7e-172	Clavicipitaceae						Phosphoglycerate mutase family
MA3_01256	117187.FVEG_04615T0	0	Nectriaceae						PAS fold
MA3_01257	140110.NechaP99968	1.2e-103	Nectriaceae						Eukaryotic cytochrome b561
MA3_01258	29875.EHK15458	1.3e-153	Hypocreaceae						DIL
MA3_01259	5127.CCT67008	0	Nectriaceae						to DIL and Ankyrin domain protein
MA3_01262	63577.G9P7G7	1.2e-234	Hypocreaceae	ko:K20133					Domain in Tre-2, BUB2p, and Cdc16p. Probable Rab-GAPs.
MA3_01267	5127.CCT67010	1.3e-71	Nectriaceae						Protein of unknown function (DUF2722)
MA3_01271	140110.NechaP78838	0	Nectriaceae	ko:K19690	ko02020, map02020	M00516			GAF domain
MA3_01273	92637.XP_007808359.1	6.4e-276	Clavicipitaceae						UDP-galactopyranose mutase
MA3_01277	63577.G9P7F7	2.6e-185	Hypocreaceae						Triose-phosphate Transporter family
MA3_01278	140110.NechaP59945	6.6e-69	Nectriaceae	ko:K02901	ko03010, map03010	M00177			Ribosomal L27e protein family
MA3_01279	5127.CCT67503	1.5e-14	Hypocreales						Non-classical export protein 1
MA3_01280	140110.NechaP99973	6.1e-103	Nectriaceae						protein serine/threonine kinase activity
MA3_01282	140110.NechaP59948	6.7e-213	Nectriaceae	ko:K00457	ko00130, ko00350, ko00360, ko01100, map00130, map00350, map00360, map01100	M00044	R01372, R02521	RC00505, RC00738	4-hydroxyphenylpyruvate dioxygenase
MA3_01283	140110.NechaP92572	6.3e-220	Nectriaceae	ko:K03142	ko03022, ko03420, ko05203, map03022, map03420, map05203	M00290			Suppressor of stem-loop protein 1
MA3_01284	5507.FOXG_07708P0	2.4e-132	Nectriaceae						Chitin synthase III catalytic subunit
MA3_01288	5127.CCT67019	1.1e-295	Nectriaceae						Belongs to the major facilitator superfamily. Sugar transporter (TC 2.A.1.1) family
MA3_01289	72228.T5A644	1.3e-21	Hypocreales
MA3_01290	140110.NechaP78848	3.4e-67	Nectriaceae	ko:K19054	ko00860, map00860		R00078	RC02758	Frataxin-like domain
MA3_01291	117187.FVEG_04637T0	9.7e-87	Nectriaceae	ko:K12399	ko04142, map04142				Belongs to the adaptor complexes small subunit family
MA3_01292	29875.EHK15476	4.9e-41	Hypocreaceae
MA3_01293	140110.NechaP68206	0	Nectriaceae	ko:K01869	ko00970, map00970	M00359,M00360	R03657	RC00055, RC00523	synthetase
MA3_01297	568076.XP_007818725.1	1.2e-36	Clavicipitaceae	ko:K15455					CSL zinc finger
MA3_01298	140110.NechaP68209	0	Nectriaceae	ko:K15628	ko02010, ko04146, map02010, map04146				to ABC fatty acid transporter
MA3_01299	568076.XP_007816309.1	2.4e-08	Clavicipitaceae
MA3_01300	474922.ELA32743	5.3e-107	Glomerellales						IBR domain, a half RING-finger domain
MA3_01302	140110.NechaP99981	1.1e-121	Nectriaceae
MA3_01303	140110.NechaP99981	5.8e-21	Nectriaceae
MA3_01304	474922.ELA32741	6.9e-293	Glomerellales						Belongs to the heat shock protein 70 family
MA3_01306	101028.EKJ76770	0	Nectriaceae	ko:K05727					Belongs to the DOCK family
MA3_01307	140110.NechaP92582	2.4e-106	Nectriaceae						Necrosis inducing protein (NPP1)
MA3_01308	29875.EHK15486	3.1e-110	Hypocreaceae						acetyltransferase
MA3_01309	140110.NechaP68215	7.6e-112	Nectriaceae	ko:K02989	ko03010, map03010	M00177			Belongs to the universal ribosomal protein uS7 family
MA3_01310	140110.NechaP102538	2.9e-42	Nectriaceae	ko:K02975	ko03010, map03010	M00177,M00179			S25 ribosomal protein
MA3_01312	5507.FOXG_07727P0	2.1e-166	Nectriaceae	ko:K05863	ko04020, ko04022, ko04217, ko04218, ko05012, ko05016, ko05166, map04020, map04022, map04217, map04218, map05012, map05016, map05166				Belongs to the mitochondrial carrier (TC 2.A.29) family
MA3_01314	568076.XP_007818734.1	2.5e-31	Clavicipitaceae						CENP-S associating Centromere protein X
MA3_01316	140110.NechaP78860	1.8e-55	Nectriaceae						Extracellular serine-rich protein
MA3_01317	51453.EGR48609	7.4e-93	Hypocreaceae						Belongs to the cytochrome b5 family
MA3_01318	140110.NechaP92587	1.4e-164	Nectriaceae
MA3_01319	140110.NechaP59975	1.7e-212	Nectriaceae						btb poz domain-containing protein
MA3_01321	35720.XP_003654342.1	1.7e-14	Chaetomiaceae
MA3_01322	140110.NechaP59977	5e-186	Nectriaceae	ko:K10756	ko03030, ko03420, ko03430, map03030, map03420, map03430	M00289,M00295			replication factor C
MA3_01323	101028.EKJ76758	8.9e-251	Nectriaceae	ko:K04716,ko:K04717	ko00600, ko04071, map00600, map04071		R06520	RC00017	Acid phosphatase homologues
MA3_01325	73501.XP_006665444.1	5.7e-85	Hypocreales	ko:K00059	ko00061, ko00333, ko00780, ko01040, ko01100, ko01130, ko01212, map00061, map00333, map00780, map01040, map01100, map01130, map01212	M00083,M00572	R04533, R04534, R04536, R04543, R04566, R04953, R04964, R07759, R07763, R10116, R10120, R11671	RC00029, RC00117	NAD dependent epimerase/dehydratase family
MA3_01326	140110.NechaP78867	2.7e-269	Nectriaceae	ko:K10685	ko04120, map04120				to ubiquitin-activating enzyme
MA3_01328	5127.CCT67046	1.6e-173	Nectriaceae						Potential Queuosine, Q, salvage protein family
MA3_01329	710243.XP_007595324.1	3.7e-55	Glomerellales	ko:K03505	ko00230, ko00240, ko01100, ko03030, ko03410, ko03420, ko03430, ko03440, ko05166, map00230, map00240, map01100, map03030, map03410, map03420, map03430, map03440, map05166	M00262	R00375, R00376, R00377, R00378	RC02795	DNA polymerase delta
MA3_01330	117187.FVEG_04663T0	1.8e-165	Nectriaceae	ko:K12601,ko:K12602	ko03018, map03018	M00392			WD domain, G-beta repeat
MA3_01331	51453.EGR48602	2.6e-46	Hypocreaceae	ko:K02911	ko03010, map03010	M00178			Ribosomal L32p protein family
MA3_01332	140110.NechaP99989	3.1e-184	Nectriaceae	ko:K16938	ko05100, map05100				Belongs to the TRAFAC class TrmE-Era-EngA-EngB-Septin- like GTPase superfamily. Septin GTPase family
MA3_01334	140110.NechaP123323	4.7e-202	Nectriaceae						Splits internally a 1,3-beta-glucan molecule and transfers the newly generated reducing end (the donor) to the non- reducing end of another 1,3-beta-glucan molecule (the acceptor) forming a 1,3-beta linkage, resulting in the elongation of 1,3- beta-glucan chains in the cell wall
MA3_01335	140110.NechaP59989	3.6e-266	Nectriaceae	ko:K01648	ko00020, ko00720, ko01100, ko01110, ko01120, ko01130, map00020, map00720, map01100, map01110, map01120, map01130		R00352	RC00004, RC00067	ATP citrate lyase citrate-binding
MA3_01336	5111.M1W4R9	0	Clavicipitaceae	ko:K01648	ko00020, ko00720, ko01100, ko01110, ko01120, ko01130, map00020, map00720, map01100, map01110, map01120, map01130		R00352	RC00004, RC00067	CoA binding domain
MA3_01338	101028.EKJ76747	7.2e-35	Nectriaceae	ko:K01648	ko00020, ko00720, ko01100, ko01110, ko01120, ko01130, map00020, map00720, map01100, map01110, map01120, map01130		R00352	RC00004, RC00067	ATP-citrate synthase subunit 1
MA3_01339	29875.EHK15509	6.9e-149	Hypocreaceae	ko:K11339					MRG
MA3_01340	27337.EGY17158	2.6e-271	Glomerellales	ko:K03033,ko:K03126	ko03022, ko03050, ko05169, map03022, map03050, map05169	M00341			Proteasome regulatory particle subunit
MA3_01341	29875.EHK23462	3.6e-134	Hypocreaceae	ko:K03126	ko03022, map03022				Transcription initiation factor TFIID subunit 12
MA3_01342	140110.NechaP99994	6.4e-105	Nectriaceae	ko:K04794
MA3_01343	101028.EKJ76744	1e-67	Nectriaceae	ko:K11696					Cnl2/NKP2 family protein
MA3_01344	72228.T5AR20	3.9e-294	Hypocreales	ko:K00143	ko00300, ko01100, ko01110, ko01130, ko01230, map00300, map01100, map01110, map01130, map01230	M00030	R03098, R04390, R04863, R11679	RC00039, RC00043, RC00070, RC00080, RC00184, RC02816	L-aminoadipate-semialdehyde dehydrogenase
MA3_01345	72228.T5AR20	1.3e-107	Hypocreales	ko:K00143	ko00300, ko01100, ko01110, ko01130, ko01230, map00300, map01100, map01110, map01130, map01230	M00030	R03098, R04390, R04863, R11679	RC00039, RC00043, RC00070, RC00080, RC00184, RC02816	L-aminoadipate-semialdehyde dehydrogenase
MA3_01346	5518.FGSG_06046P0	3.5e-296	Nectriaceae						Leucine Rich repeat
MA3_01348	92637.XP_007808262.1	2.4e-59	Clavicipitaceae	ko:K02128	ko00190, ko01100, ko04714, ko05010, ko05012, ko05016, map00190, map01100, map04714, map05010, map05012, map05016	M00158			Belongs to the ATPase C chain family
MA3_01352	140110.NechaP92603	4.3e-308	Nectriaceae	ko:K12591	ko03018, map03018				PMC2NT (NUC016) domain
MA3_01353	117187.FVEG_04683T0	3e-282	Nectriaceae	ko:K00697	ko00500, ko01100, map00500, map01100		R02737	RC00005, RC00049, RC02748	UDP-glucose-glucosephosphate glucosyltransferase
MA3_01354	140110.NechaP92605	0	Nectriaceae	ko:K15445					VID27 cytoplasmic protein
MA3_01355	140110.NechaP78887	2.4e-194	Nectriaceae	ko:K05906	ko00900, ko01130, map00900, map01130		R09562	RC00069, RC02012	Prenylcysteine lyase
MA3_01357	117187.FVEG_04686T0	6e-276	Nectriaceae						Conserved hypothetical protein
MA3_01361	5111.M1W9G3	1.3e-282	Clavicipitaceae	ko:K15633	ko00010, ko00260, ko00680, ko01100, ko01110, ko01120, ko01130, ko01200, ko01230, map00010, map00260, map00680, map01100, map01110, map01120, map01130, map01200, map01230	M00001,M00002,M00003	R01518	RC00536	BPG-independent PGAM N-terminus (iPGM_N)
MA3_01362	140110.NechaP78890	4.3e-28	Nectriaceae						RNA polymerase II transcription mediator complex subunit 9
MA3_01363	140110.NechaP100001	1.9e-148	Nectriaceae	ko:K21766					Tubulin binding cofactor C
MA3_01366	101028.EKJ75568	0	Nectriaceae	ko:K03860	ko00563, ko01100, map00563, map01100		R05916		N-acetylglucosaminyl transferase component (Gpi1)
MA3_01368	63577.G9NZN1	4.7e-47	Hypocreaceae						Transcriptional regulator
MA3_01369	51453.EGR48979	6.4e-145	Hypocreaceae	ko:K01785	ko00010, ko00052, ko01100, ko01110, ko01120, ko01130, map00010, map00052, map01100, map01110, map01120, map01130	M00632	R01602, R10619	RC00563	Aldose 1-epimerase
MA3_01370	140110.NechaP102541	4.5e-65	Nectriaceae	ko:K14686	ko01524, ko04978, map01524, map04978				Ctr copper transporter family
MA3_01372	140110.NechaP100005	5.2e-42	Nectriaceae						SAM domain (Sterile alpha motif)
MA3_01373	92637.XP_007808248.1	7e-28	Clavicipitaceae
MA3_01374	5518.FGSG_06064P0	8.4e-61	Nectriaceae	ko:K18184	ko04714, map04714				Cytochrome c oxidase protein 20, mitochondrial
MA3_01375	140110.NechaP20015	0	Nectriaceae	ko:K02324	ko00230, ko00240, ko01100, ko03030, ko03410, ko03420, ko05166, map00230, map00240, map01100, map03030, map03410, map03420, map05166	M00263	R00375, R00376, R00377, R00378	RC02795	dna polymerase
MA3_01376	5127.CCT67519	1.7e-245	Hypocreales						DNA polymerase epsilon
MA3_01377	140110.NechaP68262	1.6e-248	Nectriaceae	ko:K18667					CUE domain
MA3_01378	72228.T5AJY9	6.3e-52	Hypocreales	ko:K02969	ko03010, map03010	M00177			40S ribosomal protein S20
MA3_01379	1173701.A0A066XDX7	9.1e-150	Glomerellales						Belongs to the glycosyl hydrolase 5 (cellulase A) family
MA3_01381	568076.XP_007820945.1	1.8e-271	Clavicipitaceae						Cytochrome P450 family protein
MA3_01383	63577.G9NZM0	0	Hypocreaceae						Frag1/DRAM/Sfk1 family
MA3_01384	140110.NechaP60022	1.8e-131	Nectriaceae						calcofluor white hypersensitive protein
MA3_01385	140110.NechaP60024	9.3e-156	Nectriaceae	ko:K14557	ko03008, map03008				U3 small nucleolar RNA-associated protein 6
MA3_01388	117187.FVEG_04708T0	0	Nectriaceae	ko:K11771					ARID/BRIGHT DNA binding domain
MA3_01389	140110.NechaP78909	3.4e-41	Nectriaceae	ko:K17430					Mitochondrial large subunit ribosomal protein (Img2)
MA3_01390	568076.XP_007820940.1	4.1e-237	Clavicipitaceae	ko:K03250	ko03013, ko05160, map03013, map05160				Component of the eukaryotic translation initiation factor 3 (eIF-3) complex, which is involved in protein synthesis of a specialized repertoire of mRNAs and, together with other initiation factors, stimulates binding of mRNA and methionyl-tRNAi to the 40S ribosome. The eIF-3 complex specifically targets and initiates translation of a subset of mRNAs involved in cell proliferation
MA3_01391	5127.CCT67085	0	Nectriaceae	ko:K03348	ko04110, ko04111, ko04113, ko04114, ko04120, ko04914, ko05166, map04110, map04111, map04113, map04114, map04120, map04914, map05166	M00389			Anaphase-promoting complex subunit 1
MA3_01392	140110.NechaP92621	0	Nectriaceae	ko:K20184	ko04138, map04138				Region in Clathrin and VPS
MA3_01396	5180.EDN93411	5.3e-60	Ascomycota						Transposase
MA3_01397	5111.M1WEJ5	1.3e-25	Hypocreales						Transposase
MA3_01398	27337.EGY19544	1.2e-55	Glomerellales						structural constituent of cell wall
MA3_01399	5518.FGSG_06078P0	2.7e-279	Nectriaceae	ko:K02434	ko00970, ko01100, map00970, map01100		R03905, R04212	RC00010	Allows the formation of correctly charged Gln-tRNA(Gln) through the transamidation of misacylated Glu-tRNA(Gln) in the mitochondria. The reaction takes place in the presence of glutamine and ATP through an activated gamma-phospho-Glu- tRNA(Gln)
MA3_01400	5127.CCT67089	1.7e-06	Nectriaceae
MA3_01401	710243.XP_007601437.1	1.2e-105	Glomerellales	ko:K07117,ko:K11426					SET domain
MA3_01404	5127.CCT67092	2.6e-104	Nectriaceae	ko:K07034					GPR1/FUN34/yaaH family
MA3_01405	97096.XP_007791126.1	1e-15	Sordariomycetes						Lea domain protein
MA3_01406	5127.CCT67094	2.8e-166	Nectriaceae
MA3_01407	5127.CCT67094	3.7e-74	Nectriaceae
MA3_01408	140110.NechaP68281	5.5e-146	Nectriaceae	ko:K05607	ko00280, ko01100, map00280, map01100	M00036	R02085	RC02416	to mitochondrial methylglutaconyl-CoA hydratase Auh
MA3_01409	140110.NechaP38255	0	Nectriaceae	ko:K11849	ko04657, map04657				Belongs to the peptidase C19 family
MA3_01410	140110.NechaP38216	0	Nectriaceae						Protein of unknown function (DUF917)
MA3_01412	746128.CADAFUBP00008969	4.1e-126	Eurotiales	ko:K01253	ko00980, ko04976, ko05204, map00980, map04976, map05204		R07013, R07014, R07027, R07071, R07072, R07082, R09410, R09417, R09443	RC01447, RC01728, RC01764, RC02528	Alpha beta hydrolase
MA3_01416	72228.T5AAC6	2.4e-11	Hypocreales	ko:K15503					ankyrin repeats
MA3_01417	140110.NechaP78928	3.1e-10	Eukaryota						response to abiotic stimulus
MA3_01420	31870.EFQ27450	2.3e-76	Glomerellales						Secreted protein
MA3_01421	29875.EHK24187	7.2e-75	Hypocreaceae						Glycosyl hydrolases family 16
MA3_01422	5127.CCT65882	0	Nectriaceae	ko:K12494	ko04144, map04144				Pleckstrin homology domain
MA3_01428	63577.G9NZJ8	1.3e-292	Hypocreales	ko:K00485	ko00982, ko01120, map00982, map01120		R08266	RC02233	Belongs to the FMO family
MA3_01429	140110.NechaP92636	3.6e-55	Nectriaceae
MA3_01430	140110.NechaP92636	1.9e-152	Nectriaceae
MA3_01431	140110.NechaP38130	2e-150	Hypocreales						Aldo/keto reductase family
MA3_01434	92637.XP_007813781.1	1.2e-123	Clavicipitaceae						Putative serine esterase (DUF676)
MA3_01435	140110.NechaP78940	5.4e-101	Nectriaceae	ko:K13108					Forkhead associated domain
MA3_01436	140110.NechaP100017	1.7e-56	Nectriaceae
MA3_01437	29875.EHK23521	2.1e-79	Hypocreaceae	ko:K01560	ko00361, ko00625, ko01100, ko01120, map00361, map00625, map01100, map01120		R05287	RC00697	Haloacid dehalogenase-like hydrolase
MA3_01438	5507.FOXG_01827P0	1.2e-62	Nectriaceae						HNH nucleases
MA3_01439	5127.CCT69426	5.8e-08	Nectriaceae
MA3_01443	5518.FGSG_07039P0	2e-80	Nectriaceae
MA3_01446	140110.NechaP60041	3.8e-232	Nectriaceae	ko:K20465					Belongs to the OSBP family
MA3_01447	5518.FGSG_07023P0	2.9e-250	Nectriaceae	ko:K01580,ko:K14790	ko00250, ko00410, ko00430, ko00650, ko01100, ko01110, ko01120, ko02024, ko04727, ko04940, map00250, map00410, map00430, map00650, map01100, map01110, map01120, map02024, map04727, map04940	M00027	R00261, R00489, R01682, R02466	RC00299	to glutamic acid decarboxylase
MA3_01449	51453.EGR48983	1.4e-121	Hypocreaceae						Ras of Complex, Roc, domain of DAPkinase
MA3_01450	29875.EHK23514	1.8e-91	Hypocreaceae						AMMECR1
MA3_01452	140110.NechaP60038	4.1e-102	Nectriaceae
MA3_01453	92637.XP_007813765.1	4.1e-45	Clavicipitaceae
MA3_01454	5507.FOXG_01770P0	4.9e-285	Nectriaceae	ko:K14790					rRNA processing protein Nop9
MA3_01455	5127.CCT62639	0	Nectriaceae	ko:K11824	ko04144, ko04721, ko04961, ko05016, map04144, map04721, map04961, map05016				Adaptins are components of the adaptor complexes which link clathrin to receptors in coated vesicles. Clathrin-associated protein complexes are believed to interact with the cytoplasmic tails of membrane proteins, leading to their selection and concentration
MA3_01456	140110.NechaP75103	3e-169	Nectriaceae	ko:K18162	ko04714, map04714				Methyltransferase domain
MA3_01457	140110.NechaP73404	3e-94	Nectriaceae	ko:K05754	ko04144, ko04666, ko04810, ko05100, ko05130, ko05131, ko05132, map04144, map04666, map04810, map05100, map05130, map05131, map05132				Functions as component of the Arp2 3 complex which is involved in regulation of actin polymerization and together with an activating nucleation-promoting factor (NPF) mediates the formation of branched actin networks
MA3_01465	176275.XP_008596458.1	3.9e-122	Hypocreales	ko:K01431,ko:K11206	ko00240, ko00410, ko00770, ko00983, ko01100, map00240, map00410, map00770, map00983, map01100	M00046	R00905, R04666, R08228	RC00096	Carbon-nitrogen hydrolase
MA3_01466	101028.EKJ69877	3.9e-212	Nectriaceae						Transcription initiation factor TFIID component TAF4 family
MA3_01467	140110.NechaP90237	0	Nectriaceae	ko:K14403	ko03015, map03015				CPSF73-100_C
MA3_01468	101028.EKJ69875	0	Nectriaceae	ko:K02154	ko00190, ko01100, ko04142, ko04145, ko04721, ko04966, ko05110, ko05120, ko05152, ko05165, ko05323, map00190, map01100, map04142, map04145, map04721, map04966, map05110, map05120, map05152, map05165, map05323	M00160			Essential component of the vacuolar proton pump (V- ATPase), a multimeric enzyme that catalyzes the translocation of protons across the membranes. Required for assembly and activity of the V-ATPase
MA3_01470	5507.FOXG_00772P0	4.9e-273	Nectriaceae						Leucine Rich Repeat domain protein
MA3_01472	5518.FGSG_00297P0	5.2e-170	Nectriaceae	ko:K11778,ko:K19197	ko00900, ko01110, map00900, map01110		R05556	RC00279, RC02839	Chromatin modification-related protein
MA3_01473	140110.NechaP98883	9.5e-163	Nectriaceae	ko:K11778	ko00900, ko01110, map00900, map01110		R05556	RC00279, RC02839	Adds multiple copies of isopentenyl pyrophosphate (IPP) to farnesyl pyrophosphate (FPP) to produce dehydrodolichyl diphosphate (Dedol-PP), a precursor of dolichol which is utilized as a sugar carrier in protein glycosylation in the endoplasmic reticulum (ER)
MA3_01474	5507.FOXG_00769P0	0	Nectriaceae						Glycosyl hydrolase family 63 C-terminal domain
MA3_01475	140110.NechaP102383	8.7e-90	Nectriaceae	ko:K02137	ko00190, ko01100, ko04714, ko05010, ko05012, ko05016, map00190, map01100, map04714, map05010, map05012, map05016	M00158			ATP synthase subunit 5, mitochondrial precursor
MA3_01476	5111.M1W7R0	7.3e-124	Clavicipitaceae	ko:K18328					Lariat debranching enzyme, C-terminal domain
MA3_01477	140110.NechaP31473	1.8e-208	Nectriaceae	ko:K18328					Lariat debranching enzyme, C-terminal domain
MA3_01478	5127.CCT62626	1.1e-50	Nectriaceae	ko:K03872	ko04066, ko04120, ko05200, ko05211, map04066, map04120, map05200, map05211	M00383,M00388			Belongs to the SKP1 family
MA3_01479	140110.NechaP90232	9e-134	Nectriaceae	ko:K07975					Belongs to the small GTPase superfamily. Rho family
MA3_01481	140110.NechaP98872	0	Nectriaceae						SANT SWI3, ADA2, N-CoR and TFIIIB'' DNA-binding domains
MA3_01482	101028.EKJ72149	4.8e-191	Nectriaceae	ko:K00809					Deoxyhypusine synthase
MA3_01483	140110.NechaP103180	6.9e-114	Nectriaceae						Aldo/keto reductase family
MA3_01484	140110.NechaP98874	5.8e-174	Nectriaceae						to dimeric dihydrodiol dehydrogenase
MA3_01486	63577.G9NJM0	1.8e-96	Hypocreaceae	ko:K15444					Methyltransferase domain
MA3_01487	140110.NechaP75076	1.1e-95	Nectriaceae						SANT SWI3, ADA2, N-CoR and TFIIIB'' DNA-binding domains
MA3_01491	5507.FOXG_00750P0	3.9e-112	Nectriaceae	ko:K17262					CAP_GLY
MA3_01493	140110.NechaP103182	8.6e-155	Nectriaceae						RING-like zinc finger
MA3_01495	474922.ELA26869	1.2e-102	Glomerellales
MA3_01496	5518.FGSG_00314P0	2.8e-78	Nectriaceae						Glycosyl hydrolase catalytic core
MA3_01497	5507.FOXG_00755P0	4.4e-141	Nectriaceae						Fungal specific transcription factor domain
MA3_01507	710243.XP_007592663.1	1.8e-13	Glomerellales	ko:K01476	ko00220, ko00330, ko01100, ko01110, ko01130, ko01230, ko05146, map00220, map00330, map01100, map01110, map01130, map01230, map05146	M00029,M00134	R00551	RC00024, RC00329	Arginase family
MA3_01508	5507.FOXG_14999P0	4.8e-13	Nectriaceae
MA3_01512	176275.XP_008598643.1	3.1e-14	Hypocreales
MA3_01514	5507.FOXG_15582P0	1.4e-13	Nectriaceae						Protein of unknown function (DUF3435)
MA3_01515	226899.F0X7W7	7.1e-144	Ophiostomatales
MA3_01516	92637.XP_007811890.1	1.1e-45	Clavicipitaceae
MA3_01517	710243.XP_007602402.1	9.1e-255	Glomerellales						cytochrome P450
MA3_01518	223192.XP_007911212.1	2.7e-53	Sordariomycetes	ko:K10586	ko04120, ko04214, ko04215, map04120, map04214, map04215				Belongs to the ubiquitin-conjugating enzyme family
MA3_01520	5127.CCT72103	2.3e-136	Nectriaceae	ko:K11650	ko04714, ko05225, map04714, map05225				Bin/amphiphysin/Rvs domain for vesicular trafficking
MA3_01521	568076.XP_007820680.1	5e-153	Clavicipitaceae	ko:K06634	ko03022, ko03420, ko04110, map03022, map03420, map04110	M00290			Cyclin C-terminal domain
MA3_01523	140110.NechaP72611	2.5e-118	Nectriaceae						Four repeated domains in the Fasciclin I family of proteins, present in many other contexts.
MA3_01524	1051613.XP_003002186.1	9e-165	Glomerellales	ko:K01213	ko00040, ko01100, map00040, map01100	M00081	R01982, R07413	RC00049	Belongs to the glycosyl hydrolase 28 family
MA3_01525	474922.ELA30630	3e-188	Glomerellales						Major Facilitator Superfamily
MA3_01526	5465.ENH89275	2.1e-182	Glomerellales						Peptidase dimerisation domain
MA3_01528	140110.NechaP93115	6.1e-203	Nectriaceae						Conserved hypothetical protein
MA3_01529	92637.XP_007813713.1	1.6e-102	Clavicipitaceae						short chain dehydrogenase reductase
MA3_01531	140110.NechaP50557	3e-166	Nectriaceae						CFEM domain
MA3_01532	5127.CCT72110	5.6e-303	Nectriaceae						Transcription factor
MA3_01533	5127.CCT73064	6.6e-81	Nectriaceae	ko:K13577	ko04964, map04964				Belongs to the mitochondrial carrier (TC 2.A.29) family
MA3_01534	5507.FOXG_04482P0	9.5e-102	Nectriaceae						Mitochondrial protein
MA3_01535	710243.XP_007591406.1	2.7e-230	Glomerellales	ko:K01027	ko00072, ko00280, ko00650, map00072, map00280, map00650		R00410	RC00014	Key enzyme for ketone body catabolism. Transfers the CoA moiety from succinate to acetoacetate. Formation of the enzyme-CoA intermediate proceeds via an unstable anhydride species formed between the carboxylate groups of the enzyme and substrate
MA3_01536	5507.FOXG_12187P0	3.5e-213	Nectriaceae						Ion channel regulatory protein UNC-93
MA3_01537	140110.NechaP97010	1.1e-177	Nectriaceae						methionine permease
MA3_01539	5507.FOXG_04486P0	4.5e-32	Nectriaceae						Chromo (CHRromatin Organisation MOdifier) domain
MA3_01541	72228.T5ALC1	1.1e-110	Sordariomycetes						integral membrane protein
MA3_01542	97096.XP_007798505.1	1.7e-169	Sordariomycetes						Fungal trichothecene efflux pump (TRI12)
MA3_01544	72228.T5AB07	2.1e-172	Hypocreales	ko:K00480	ko00621, ko00624, ko00626, ko01100, ko01120, ko01220, map00621, map00624, map00626, map01100, map01120, map01220		R00818, R05632, R06915, R06936, R06939	RC00389	FAD binding domain
MA3_01545	140110.NechaP101968	2.1e-151	Nectriaceae	ko:K07243					to high-affinity iron
MA3_01547	140110.NechaP64357	9.6e-256	Nectriaceae	ko:K19791					Belongs to the multicopper oxidase family
MA3_01548	5127.CCT72118	5.5e-37	Nectriaceae						Possible membrane-associated motif in LPS-induced tumor necrosis factor alpha factor (LITAF), also known as PIG7, and other animal proteins.
MA3_01550	140110.NechaP78360	4.2e-63	Nectriaceae
MA3_01551	29850.GGTG_13281T0	4.6e-54	Magnaporthales						Serine threonine-protein kinase sgk2
MA3_01552	474922.ELA38148	0	Glomerellales						Repeat domain in Vibrio, Colwellia, Bradyrhizobium and Shewanella
MA3_01555	140110.NechaP60631	1.4e-252	Nectriaceae						Belongs to the major facilitator superfamily. Sugar transporter (TC 2.A.1.1) family
MA3_01556	40559.M7U6Y4	2.5e-86	Ascomycota						Glycoside hydrolase family 71 protein
MA3_01557	140110.NechaP92287	1.3e-57	Nectriaceae
MA3_01558	101028.EKJ79272	9.1e-171	Nectriaceae						Major Facilitator Superfamily
MA3_01560	140110.NechaP52435	0	Nectriaceae
MA3_01562	140110.NechaP78174	1e-124	Nectriaceae	ko:K01739	ko00270, ko00450, ko00920, ko01100, ko01110, ko01130, ko01230, map00270, map00450, map00920, map01100, map01110, map01130, map01230	M00017	R00999, R01288, R02508, R03217, R03260, R04944, R04945, R04946	RC00020, RC00056, RC00069, RC00420, RC02848, RC02866	Cys/Met metabolism PLP-dependent enzyme
MA3_01563	5127.CCT73026	5.6e-116	Nectriaceae						ankyrin repeat protein
MA3_01565	5127.CCT75043	3.6e-186	Nectriaceae
MA3_01568	5501.XP_001244170.1	1.2e-232	Onygenales						Putative lipopolysaccharide-modifying enzyme.
MA3_01572	223192.XP_007911233.1	1.9e-207	Sordariomycetes						Nicotinamide mononucleotide permease
MA3_01573	80884.CCF40657	2.1e-162	Glomerellales	ko:K00101	ko00620, ko01100, map00620, map01100		R00196	RC00044	Belongs to the cytochrome b5 family
MA3_01574	474922.ELA30043	3.1e-204	Glomerellales	ko:K01684	ko00052, ko01100, ko01120, map00052, map01100, map01120	M00552	R03033	RC00543	Mandelate racemase muconate lactonizing enzyme
MA3_01575	97096.XP_007789778.1	2.7e-58	Sordariomycetes	ko:K00008	ko00040, ko00051, ko01100, map00040, map00051, map01100	M00014	R00875, R01896	RC00085, RC00102	Sorbitol dehydrogenase
MA3_01576	710243.XP_007602091.1	1.2e-119	Glomerellales	ko:K00065	ko00040, map00040		R01542	RC00089	2-deoxy-d-gluconate 3-dehydrogenase
MA3_01577	474922.ELA30047	1.2e-132	Glomerellales	ko:K00077	ko00770, ko01100, ko01110, map00770, map01100, map01110	M00119	R02472	RC00726	Catalyzes the NADPH-dependent reduction of ketopantoate into pantoic acid
MA3_01578	710243.XP_007598440.1	2.5e-236	Glomerellales						Major Facilitator Superfamily
MA3_01580	140110.NechaP47496	3.3e-219	Nectriaceae
MA3_01582	33178.CADATEAP00006385	2.2e-191	Eurotiomycetes						Prolyl 4-hydroxylase alpha subunit homologues.
MA3_01584	140110.NechaP30409	5.1e-148	Nectriaceae	ko:K03457					Permease for cytosine/purines, uracil, thiamine, allantoin
MA3_01585	140110.NechaP30409	2.1e-219	Nectriaceae	ko:K03457					Permease for cytosine/purines, uracil, thiamine, allantoin
MA3_01586	140110.NechaP74021	0	Nectriaceae						Protein of unknown function (DUF917)
MA3_01587	92637.XP_007811119.1	1.4e-248	Clavicipitaceae	ko:K09241					Fungal specific transcription factor domain
MA3_01588	140110.NechaP42351	6e-223	Sordariomycetes						Belongs to the major facilitator superfamily. Sugar transporter (TC 2.A.1.1) family
MA3_01590	140110.NechaP81004	1.4e-137	Hypocreales	ko:K17742	ko00051, map00051		R07346	RC00102	Enoyl-(Acyl carrier protein) reductase
MA3_01591	140110.NechaP81006	1.1e-97	Hypocreales	ko:K05351	ko00040, ko01100, map00040, map01100	M00014	R01896	RC00102	Alcohol dehydrogenase GroES-like domain
MA3_01592	140110.NechaP42050	1.3e-129	Nectriaceae						KR domain
MA3_01593	31870.EFQ34828	0	Glomerellales						OPT family Small oligopeptide transporter
MA3_01596	117187.FVEG_06442T0	1.3e-229	Nectriaceae						Belongs to the type-B carboxylesterase lipase family
MA3_01597	36651.K9GBG6	8.1e-46	Eurotiales	ko:K05349	ko00460, ko00500, ko00940, ko01100, ko01110, map00460, map00500, map00940, map01100, map01110		R00026, R02558, R02887, R02985, R03527, R04949, R04998, R10035, R10039, R10040	RC00049, RC00059, RC00171, RC00262, RC00397, RC00451, RC00714, RC00746, RC01248	PA14 domain
MA3_01598	140110.NechaP97368	8.7e-200	Nectriaceae						Major Facilitator Superfamily
MA3_01599	5111.M1VU70	6e-34	Ascomycota
MA3_01603	5507.FOXG_16601P0	4.8e-130	Nectriaceae						Dienelactone hydrolase family
MA3_01604	140110.NechaP45623	3.7e-147	Nectriaceae	ko:K10437	ko00360, ko00643, ko01100, ko01120, map00360, map00643, map01100, map01120		R05487	RC00046	Belongs to the cytochrome P450 family
MA3_01607	140110.NechaP92086	4.4e-124	Nectriaceae						integral membrane protein
MA3_01608	140110.NechaP35279	0	Nectriaceae	ko:K00108	ko00260, ko01100, map00260, map01100	M00555	R01025	RC00087	GMC oxidoreductase
MA3_01613	140110.NechaP51916	3e-214	Nectriaceae						to fungal specific transcription factor domain containing protein
MA3_01614	568076.XP_007817096.1	1.6e-40	Clavicipitaceae						c6 transcription factor
MA3_01616	310453.XP_007587230.1	5.3e-49	Ascomycota						GLEYA domain
MA3_01617	5059.CADAFLAP00008516	0	Eurotiales						3-beta hydroxysteroid dehydrogenase/isomerase family
MA3_01618	746128.CADAFUBP00008360	1.6e-178	Eurotiales	ko:K17827	ko00404, ko01130, map00404, map01130	M00786	R10416	RC03175	cytochrome P450
MA3_01620	140110.NechaP74037	9.9e-119	Sordariomycetes
MA3_01623	5059.CADAFLAP00009749	2.3e-95	Eurotiomycetes						C6 transcription factor
MA3_01624	310453.XP_007586846.1	8.8e-184	Dothideomycetes	ko:K08141					Belongs to the major facilitator superfamily. Sugar transporter (TC 2.A.1.1) family
MA3_01626	310453.XP_007586850.1	9.9e-226	Dothideomycetes	ko:K01182	ko00052, ko00500, ko01100, map00052, map00500, map01100		R00801, R01718, R01791, R06199	RC00028, RC00059, RC00077, RC00451	Glycoside hydrolase family 13 protein
MA3_01627	72228.T5ABQ5	4.5e-62	Hypocreales
MA3_01628	140110.NechaP82002	7.9e-09	Sordariomycetes
MA3_01631	36651.K9FKJ9	1.5e-304	Eurotiales	ko:K01687	ko00290, ko00770, ko01100, ko01110, ko01130, ko01210, ko01230, map00290, map00770, map01100, map01110, map01130, map01210, map01230	M00019,M00570	R01209, R04441, R05070	RC00468, RC01714	dehydratase
MA3_01633	69781.S7ZIH6	8.1e-157	Eurotiales						Fungal specific transcription factor domain
MA3_01634	69781.S7ZIH6	2.7e-25	Eurotiales						Fungal specific transcription factor domain
MA3_01635	29875.EHK19407	9.4e-207	Hypocreaceae						Protein kinase domain
MA3_01636	29875.EHK19406	3.8e-31	Hypocreaceae
MA3_01637	5127.CCT65341	4.3e-17	Nectriaceae						Fungal specific transcription factor domain
MA3_01638	140110.NechaP102906	2.2e-111	Nectriaceae	ko:K03386	ko04214, map04214				C-terminal domain of 1-Cys peroxiredoxin
MA3_01639	29875.EHK17354	3.5e-241	Hypocreaceae	ko:K01426	ko00330, ko00360, ko00380, ko00627, ko00643, ko01120, map00330, map00360, map00380, map00627, map00643, map01120		R02540, R03096, R03180, R03909, R05551, R05590	RC00010, RC00100, RC00950, RC01025	Amidase
MA3_01640	474922.ELA25325	8.3e-27	Glomerellales
MA3_01642	64363.EME38479	6.5e-78	Dothideomycetes
MA3_01643	101852.XP_008081164.1	0	Ascomycota	ko:K15416					Thioesterase domain
MA3_01645	140110.NechaP51427	2.5e-238	Sordariomycetes						Cytochrome P450
MA3_01646	226899.F0XAW3	6e-198	Ophiostomatales	ko:K07824	ko00362, ko00627, ko01100, ko01120, ko01220, map00362, map00627, map01100, map01120, map01220		R01295	RC00490	Cytochrome P450
MA3_01647	117187.FVEG_13226T0	5.8e-25	Nectriaceae	ko:K06978					X-Pro dipeptidyl-peptidase C-terminal non-catalytic domain
MA3_01648	140110.NechaP87469	7.8e-160	Ascomycota						Belongs to the cytochrome P450 family
MA3_01651	393283.XP_007839344.1	3.7e-12	Sordariomycetes						cytochrome P-450
MA3_01652	40559.M7UAQ5	1.6e-189	Ascomycota						Cytochrome p-450
MA3_01653	80884.CCF35121	9.2e-114	Glomerellales						Belongs to the short-chain dehydrogenases reductases (SDR) family
MA3_01656	1173701.A0A066XVY8	5.8e-47	Glomerellales						Maltose acetyltransferase
MA3_01657	5518.FGSG_02406P0	1.7e-180	Nectriaceae						Major Facilitator Superfamily
MA3_01659	393283.XP_007841114.1	5.9e-89	Ascomycota						Fungal specific transcription factor domain
MA3_01661	140110.NechaP61064	0	Nectriaceae	ko:K01194	ko00500, ko01100, map00500, map01100		R00010	RC00049	Alpha-trehalose glucohydrolase
MA3_01662	1108849.XP_002565451.1	4e-27	Eurotiales	ko:K05349	ko00460, ko00500, ko00940, ko01100, ko01110, map00460, map00500, map00940, map01100, map01110		R00026, R02558, R02887, R02985, R03527, R04949, R04998, R10035, R10039, R10040	RC00049, RC00059, RC00171, RC00262, RC00397, RC00451, RC00714, RC00746, RC01248	Beta-glucosidases are one of a number of cellulolytic enzymes involved in the degradation of cellulosic biomass. Catalyzes the last step releasing glucose from the inhibitory cellobiose (By similarity)
MA3_01663	5507.FOXG_13278P0	8.5e-47	Nectriaceae						Fungal specific transcription factor domain
MA3_01664	5970.XP_009159429.1	1.8e-223	Eurotiomycetes						Major Facilitator Superfamily
MA3_01665	43229.XP_007724779.1	5.4e-177	Eurotiomycetes						FAD dependent oxidoreductase
MA3_01666	1179773.BN6_17750	5.4e-10	Actinobacteria
MA3_01668	5022.CBX99538	1.4e-58	Pleosporales						GAL4-like Zn(II)2Cys6 (or C6 zinc) binuclear cluster DNA-binding domain
MA3_01671	39416.CAZ85504	6e-56	Ascomycota						lysine decarboxylase-like protein
MA3_01672	1047171.Mycgr3P107854	2.6e-54	Ascomycota	ko:K00791,ko:K10760	ko00908, ko01100, ko01110, map00908, map01100, map01110		R01122, R04038, R08051, R08052	RC00121, RC02820	Catalyzes the transfer of a dimethylallyl group onto the adenine at position 37
MA3_01673	72228.T5ADI8	1.5e-72	Hypocreales						non-haem dioxygenase in morphine synthesis N-terminal
MA3_01675	97096.XP_007797491.1	1e-35	Sordariomycetes	ko:K00018	ko00260, ko00630, ko00680, ko01100, ko01110, ko01120, ko01130, ko01200, map00260, map00630, map00680, map01100, map01110, map01120, map01130, map01200	M00346	R00717, R01388	RC00031, RC00042	Belongs to the D-isomer specific 2-hydroxyacid dehydrogenase family
MA3_01676	63577.G9NNV4	7.8e-222	Hypocreaceae	ko:K19572	ko00230, ko01100, map00230, map01100		R01560	RC00477	Adenosine/AMP deaminase
MA3_01677	31870.EFQ29660	4.2e-10	Glomerellales	ko:K04708	ko00600, ko01100, map00600, map01100	M00094,M00099	R02978	RC00089	Enoyl-(Acyl carrier protein) reductase
MA3_01678	35725.K2QMW3	3e-178	Dothideomycetes						Amino acid permease
MA3_01680	43228.XP_007729503.1	5.6e-116	Ascomycota						Phytanoyl-CoA dioxygenase (PhyH)
MA3_01681	140110.NechaP85217	8e-16	Nectriaceae						Major Facilitator Superfamily
MA3_01682	43229.XP_007724769.1	1.2e-79	Eukaryota						oxidation-reduction process
MA3_01683	393283.XP_007841114.1	8.8e-114	Ascomycota						Fungal specific transcription factor domain
MA3_01684	140110.NechaP78476	1.3e-32	Nectriaceae						Endoribonuclease L-PSP
MA3_01685	140110.NechaP78478	3.6e-184	Nectriaceae						Flavin containing amine oxidoreductase
MA3_01687	43229.XP_007724771.1	2.2e-150	Eurotiomycetes	ko:K19564					Amino acid permease
MA3_01688	29908.U7PML4	6.7e-213	Ophiostomatales	ko:K01426	ko00330, ko00360, ko00380, ko00627, ko00643, ko01120, map00330, map00360, map00380, map00627, map00643, map01120		R02540, R03096, R03180, R03909, R05551, R05590	RC00010, RC00100, RC00950, RC01025	Amidase
MA3_01689	43228.XP_007733706.1	1.1e-35	Chaetothyriomycetidae						Maltose acetyltransferase
MA3_01690	29908.U7PNU8	2.7e-104	Sordariomycetes						Fungal specific transcription factor domain
MA3_01691	29908.U7PMK9	0	Ophiostomatales	ko:K00276	ko00260, ko00350, ko00360, ko00410, ko00950, ko00960, ko01100, ko01110, map00260, map00350, map00360, map00410, map00950, map00960, map01100, map01110		R02382, R02529, R02613, R03139, R04027, R04300, R06154, R06740	RC00062, RC00189, RC00676, RC01052	Copper amine oxidase, enzyme domain
MA3_01693	5127.CCT71935	1.5e-206	Hypocreales						Glycosyltransferase family 31 protein
MA3_01694	5127.CCT71936	1.2e-182	Sordariomycetes	ko:K00752					Glycosyl transferase family 21
MA3_01696	97096.XP_007797078.1	4.8e-32	Sordariomycetes
MA3_01697	226899.F0XUN2	1.3e-58	Ophiostomatales	ko:K16369	ko00564, ko01100, ko01110, map00564, map01100, map01110	M00091	R02056	RC00003, RC00060	Catalyzes the first step of the methylation pathway of phosphatidylcholine biosynthesis, the SAM-dependent methylation of phosphatidylethanolamine (PE) to phosphatidylmonomethylethanolamine (PMME)
MA3_01699	568076.XP_007817977.1	1.5e-17	Clavicipitaceae						IBR domain, a half RING-finger domain
MA3_01700	33188.XP_002541317.1	8.8e-22	Ascomycota
MA3_01701	5059.CADAFLAP00013034	3.7e-207	Eurotiales	ko:K08282					Protein kinase domain
MA3_01702	29875.EHK17390	7.6e-200	Hypocreaceae						glycosyltransferase family 31
MA3_01703	29875.EHK20483	3.7e-61	Hypocreaceae						Fungal specific transcription factor domain
MA3_01704	140110.NechaP70562	8e-186	Nectriaceae						Major Facilitator Superfamily
MA3_01705	5518.FGSG_02854P0	2.6e-45	Nectriaceae
MA3_01706	5127.CCT75139	5e-52	Nectriaceae
MA3_01707	140110.NechaP92278	2.2e-113	Hypocreales						Enoyl-(Acyl carrier protein) reductase
MA3_01708	474922.ELA35748	1.1e-113	Glomerellales						Cytochrome p-450
MA3_01709	474922.ELA24765	9e-41	Glomerellales						Cytochrome p-450
MA3_01710	27337.EGY20761	2.1e-71	Glomerellales						Duf250 domain membrane protein
MA3_01711	5127.CCT74021	9.2e-94	Nectriaceae						Glycosyl transferase family 64 domain
MA3_01712	140110.NechaP95049	8.7e-82	Nectriaceae						Belongs to the tannase family
MA3_01713	97096.XP_007791541.1	1.1e-25	Sordariomycetes						Belongs to the tannase family
MA3_01714	5145.XP_001903235.1	9.4e-58	Sordariales
MA3_01716	97096.XP_007794801.1	6.8e-114	Sordariomycetes						Belongs to the oxygen-dependent FAD-linked oxidoreductase family
MA3_01717	45151.EDU50343	3.8e-94	Dothideomycetes	ko:K22213					Amidohydrolase
MA3_01718	53485.EFQ91439	9.2e-191	Pleosporales						Belongs to the cytochrome P450 family
MA3_01719	35725.K2R8L0	0	Dothideomycetes						Polyketide synthase dehydratase
MA3_01720	27337.EGY18969	5.8e-166	Glomerellales	ko:K00354			R00282	RC00001	NADPH dehydrogenase
MA3_01721	5507.FOXG_04490P0	3.9e-121	Nectriaceae						Phosphatidylserine decarboxylase
MA3_01722	5127.CCT68908	1.3e-163	Nectriaceae						to glycosyl transferase
MA3_01724	140110.NechaP94386	1.9e-209	Nectriaceae						Acyltransferase family
MA3_01725	140110.NechaP43074	4.5e-149	Nectriaceae
MA3_01727	5127.CCT71960	2.3e-220	Nectriaceae	ko:K07300					Belongs to the Ca(2 ) cation antiporter (CaCA) (TC 2.A.19) family
MA3_01728	474922.ELA31645	9.3e-144	Glomerellales						Methionine permease
MA3_01729	63577.G9NP39	2.4e-113	Hypocreales						Glycosyltransferase sugar-binding region containing DXD motif
MA3_01731	27337.EGY14130	3.7e-93	Glomerellales	ko:K01181					Belongs to the glycosyl hydrolase 11 (cellulase G) family
MA3_01733	140110.NechaP72759	1.9e-171	Nectriaceae	ko:K00004	ko00650, map00650		R02855, R02946, R10504	RC00205, RC00525	Alcohol dehydrogenase GroES-like domain
MA3_01734	318829.MGG_07999T0	7.1e-32	Magnaporthales
MA3_01736	5465.ENH76215	4.3e-09	Glomerellales						Amino acid permease
MA3_01738	140110.NechaP89126	0	Nectriaceae	ko:K14708					STAS domain
MA3_01739	140110.NechaP56206	1.1e-256	Nectriaceae						Belongs to the type-B carboxylesterase lipase family
MA3_01741	5507.FOXG_09644P0	0	Nectriaceae	ko:K01235					Alpha-glucuronidase involved in the hydrolysis of xylan, a major structural heterogeneous polysaccharide found in plant biomass representing the second most abundant polysaccharide in the biosphere, after cellulose. Releases 4-O-methylglucuronic acid from xylan
MA3_01745	5127.CCT66527	6.7e-199	Nectriaceae						Major Facilitator Superfamily
MA3_01747	37727.XP_002152204.1	2.2e-20	Eurotiales
MA3_01749	140110.NechaP50592	3.3e-158	Nectriaceae						to extracellular dioxygenase
MA3_01750	63577.G9NQM4	1.3e-219	Hypocreaceae	ko:K02575	ko00910, map00910	M00615			Major Facilitator Superfamily
MA3_01751	1392244.V5EZ34	0	Ustilaginomycotina	ko:K17877	ko00910, ko01120, map00910, map01120	M00531	R00787, R00789	RC00176	Rieske-like [2Fe-2S] domain
MA3_01752	29875.EHK25862	0	Hypocreaceae	ko:K10534	ko00910, ko01120, map00910, map01120	M00531	R00794, R00796	RC02812	Oxidoreductase molybdopterin binding domain
MA3_01754	5507.FOXG_17375P0	3.6e-273	Nectriaceae						Belongs to the major facilitator superfamily. Sugar transporter (TC 2.A.1.1) family
MA3_01755	140110.NechaP102170	2.6e-222	Nectriaceae						Las17-binding protein actin regulator
MA3_01756	31870.EFQ31579	2.8e-169	Glomerellales						GMC oxidoreductase
MA3_01759	27337.EGY20111	2.1e-108	Glomerellales						Belongs to the glycosyl hydrolase 43 family
MA3_01761	140110.NechaP33693	8.9e-288	Nectriaceae						to fructose facilitator
MA3_01762	40384.G7XZC7	3.4e-61	Eurotiales						Cysteine-rich secreted protein
MA3_01763	474922.ELA31334	1.8e-65	Glomerellales						L-asparaginase ii
MA3_01764	264951.V5F904	6.1e-179	Eurotiales	ko:K04091	ko00920, map00920		R07210, R10206	RC01779, RC02556	Luciferase-like monooxygenase
MA3_01765	140110.NechaP79492	1.7e-68	Nectriaceae
MA3_01767	101028.EKJ76513	4.7e-16	Nectriaceae
MA3_01769	5059.CADAFLAP00000061	3.5e-49	Eurotiomycetes	ko:K00306	ko00260, ko00310, ko01100, ko04146, map00260, map00310, map01100, map04146		R00610, R02204	RC00060, RC00083, RC00557	FAD dependent oxidoreductase
MA3_01770	710243.XP_007597130.1	9.2e-38	Glomerellales	ko:K00286,ko:K14454	ko00220, ko00250, ko00270, ko00330, ko00350, ko00360, ko00400, ko00710, ko00950, ko00960, ko01100, ko01110, ko01120, ko01130, ko01200, ko01210, ko01230, map00220, map00250, map00270, map00330, map00350, map00360, map00400, map00710, map00950, map00960, map01100, map01110, map01120, map01130, map01200, map01210, map01230	M00015,M00170,M00171	R00355, R00694, R00734, R00896, R01248, R01251, R02433, R02619, R03291, R03293, R05052	RC00006, RC00054, RC00083	Converts proline to delta-1-pyrroline-5-carboxylate
MA3_01771	140110.NechaP105936	1.1e-113	Nectriaceae	ko:K01179	ko00500, ko01100, map00500, map01100		R06200, R11307, R11308		Belongs to the glycosyl hydrolase 5 (cellulase A) family
MA3_01772	5127.CCT74798	4.9e-27	Nectriaceae
MA3_01775	474922.ELA30049	5.6e-13	Glomerellales	ko:K01053	ko00030, ko00053, ko00930, ko01100, ko01110, ko01120, ko01130, ko01200, ko01220, map00030, map00053, map00930, map01100, map01110, map01120, map01130, map01200, map01220	M00129	R01519, R02933, R03751	RC00537, RC00983	SMP-30/Gluconolaconase/LRE-like region
MA3_01776	101028.EKJ75823	4e-203	Nectriaceae	ko:K19564					Amino acid permease
MA3_01777	5507.FOXG_05680P0	6.1e-84	Nectriaceae						Monoamine oxidase N
MA3_01778	51453.EGR51029	2.4e-15	Hypocreaceae						Fungal specific transcription factor domain
MA3_01779	393283.XP_007827531.1	3.1e-290	Sordariomycetes						steroid monooxygenase
MA3_01780	27337.EGY22504	2.5e-196	Glomerellales						Beta-lactamase
MA3_01782	5127.CCT66690	2.3e-196	Nectriaceae						regulatory protein AlcR
MA3_01784	5127.CCT71967	1.1e-238	Nectriaceae						Fungal specific transcription factor domain
MA3_01785	140110.NechaP94802	1.1e-176	Nectriaceae						Aldo/keto reductase family
MA3_01787	5127.CCT71969	1e-167	Nectriaceae						BNR repeat-like domain
MA3_01788	5518.FGSG_01811P0	1.3e-126	Nectriaceae						GDP-mannose 4,6 dehydratase
MA3_01789	5127.CCT71971	1.4e-196	Nectriaceae	ko:K00101	ko00620, ko01100, map00620, map01100		R00196	RC00044	Belongs to the cytochrome b5 family
MA3_01790	140110.NechaP82289	1.9e-151	Nectriaceae	ko:K18123,ko:K18339	ko00051, ko00330, ko00630, ko01100, ko01120, map00051, map00330, map00630, map01100, map01120		R00470, R00471, R02261	RC00307, RC00308, RC00435	Belongs to the DapA family
MA3_01791	101028.EKJ68331	1.4e-220	Nectriaceae						Major Facilitator Superfamily
MA3_01792	474922.ELA24504	8.1e-212	Glomerellales						Major Facilitator Superfamily
MA3_01793	474922.ELA24503	1e-156	Glomerellales						Belongs to the D-isomer specific 2-hydroxyacid dehydrogenase family
MA3_01794	568076.XP_007824831.1	4.1e-34	Hypocreales						Enoyl-(Acyl carrier protein) reductase
MA3_01795	5507.FOXG_17301P0	4.5e-210	Nectriaceae						GMC oxidoreductase
MA3_01797	140110.NechaP100440	5.6e-76	Nectriaceae						Fungal specific transcription factor domain
MA3_01798	140110.NechaP104385	9.9e-192	Nectriaceae	ko:K01480	ko00330, ko01100, map00330, map01100	M00133	R01157	RC00024, RC00329	Belongs to the arginase family
MA3_01799	140110.NechaP40221	2.6e-217	Nectriaceae	ko:K03327					Polysaccharide biosynthesis C-terminal domain
MA3_01800	140110.NechaP40033	4.1e-198	Nectriaceae						Amino acid permease
MA3_01801	5127.CCT63590	9.8e-164	Nectriaceae						Enoyl-(Acyl carrier protein) reductase
MA3_01802	710243.XP_007599305.1	3.2e-304	Glomerellales						Flavin-binding monooxygenase-like
MA3_01803	101028.EKJ71743	0	Hypocreales						Major Facilitator Superfamily
MA3_01804	5127.CCT63586	4.9e-142	Nectriaceae						Metallo-beta-lactamase superfamily
MA3_01805	140110.NechaP44330	4.1e-272	Nectriaceae						Pyridine nucleotide-disulphide oxidoreductase
MA3_01806	5465.ENH81195	9.4e-124	Glomerellales						alpha/beta hydrolase fold
MA3_01807	5127.CCT63583	4.8e-130	Nectriaceae						Enoyl-(Acyl carrier protein) reductase
MA3_01808	140110.NechaP94749	2.4e-91	Nectriaceae	ko:K13953	ko00010, ko00071, ko00350, ko00625, ko00626, ko00830, ko00980, ko00982, ko01100, ko01110, ko01120, ko01130, ko01220, map00010, map00071, map00350, map00625, map00626, map00830, map00980, map00982, map01100, map01110, map01120, map01130, map01220		R00623, R00754, R02124, R04880, R05233, R05234, R06917, R06927, R07105, R08281, R08306, R08310	RC00050, RC00087, RC00088, RC00099, RC00116, RC00649, RC01734, RC02273	Zinc-binding dehydrogenase
MA3_01809	5507.FOXG_08814P0	5.5e-147	Nectriaceae						AMP-binding enzyme C-terminal domain
MA3_01812	140110.NechaP82843	1.8e-54	Nectriaceae
MA3_01815	140110.NechaP91444	4.1e-238	Nectriaceae	ko:K08900					Belongs to the AAA ATPase family
MA3_01817	80884.CCF36141	3.4e-154	Glomerellales						Heterokaryon incompatibility protein
MA3_01819	5465.ENH82835	6.4e-147	Glomerellales						Longiborneol synthase
MA3_01823	5507.FOXG_12378P0	1.8e-115	Nectriaceae						Necrosis inducing protein (NPP1)
MA3_01824	209285.XP_006697640.1	1e-148	Chaetomiaceae	ko:K00008,ko:K05351	ko00040, ko00051, ko01100, map00040, map00051, map01100	M00014	R00875, R01896	RC00085, RC00102	Zinc-binding dehydrogenase
MA3_01825	140110.NechaP82376	5.3e-141	Nectriaceae						GAL4-like Zn(II)2Cys6 (or C6 zinc) binuclear cluster DNA-binding domain
MA3_01826	61273.S3BXG3	9e-252	Ophiostomatales	ko:K01209	ko00520, map00520		R01762		Alpha-L-arabinofuranosidase C-terminus
MA3_01827	5127.CCT75334	4.1e-39	Nectriaceae						Methyltransferase domain
MA3_01828	140110.NechaP72678	8.1e-50	Nectriaceae						Methyltransferase domain
MA3_01829	140110.NechaP60615	4.2e-102	Nectriaceae						Domain of unknown function (DUF3328)
MA3_01831	51453.EGR45372	3.4e-09	Hypocreaceae						CorA-like Mg2+ transporter protein
MA3_01832	5127.CCT72575	9e-111	Nectriaceae						Belongs to the short-chain dehydrogenases reductases (SDR) family
MA3_01833	393283.XP_007833300.1	4.1e-37	Sordariomycetes						Zinc-binding dehydrogenase
MA3_01834	92637.XP_007808582.1	2.4e-34	Clavicipitaceae
MA3_01835	393283.XP_007837624.1	9.7e-129	Sordariomycetes	ko:K07140					MOSC domain-containing protein
MA3_01836	140110.NechaP94027	6e-147	Nectriaceae						Fungal specific transcription factor domain
MA3_01837	474922.ELA28440	9.1e-241	Glomerellales	ko:K00129	ko00010, ko00340, ko00350, ko00360, ko00410, ko00980, ko00982, ko01100, ko01110, ko01120, ko05204, map00010, map00340, map00350, map00360, map00410, map00980, map00982, map01100, map01110, map01120, map05204		R00711, R00904, R02536, R02537, R02695, R02697, R03300, R03302, R04882, R04883, R04888, R04889, R04891, R04892, R04996, R07104, R08282, R08283, R08307	RC00047, RC00080, RC00242, RC01735	Belongs to the aldehyde dehydrogenase family
MA3_01839	710243.XP_007596345.1	8.9e-186	Glomerellales						Major Facilitator Superfamily
MA3_01842	1051613.XP_003007857.1	0	Glomerellales	ko:K01811					Belongs to the glycosyl hydrolase 31 family
MA3_01843	97096.XP_007798296.1	4.5e-254	Sordariomycetes	ko:K08141					Belongs to the major facilitator superfamily. Sugar transporter (TC 2.A.1.1) family
MA3_01844	5127.CCT68003	7.5e-179	Nectriaceae	ko:K03457					Permease for cytosine/purines, uracil, thiamine, allantoin
MA3_01845	117187.FVEG_03374T0	0	Nectriaceae						Protein of unknown function (DUF917)
MA3_01848	1108849.XP_002567964.1	2e-43	Eurotiomycetes						Membrane bound O-acyl transferase family
MA3_01849	199306.XP_003067001.1	3.4e-45	Onygenales	ko:K13280	ko03060, map03060				Signal peptidase complex catalytic subunit SEC11
MA3_01850	1173701.A0A066XPH5	6.3e-96	Glomerellales						Endonuclease Exonuclease phosphatase
MA3_01853	5059.CADAFLAP00009386	1.1e-179	Ascomycota						Cellulose-binding protein
MA3_01854	80884.CCF43270	1.4e-20	Glomerellales	ko:K13348	ko04146, map04146				Belongs to the peroxisomal membrane protein PXMP2 4 family
MA3_01856	5507.FOXG_02398P0	1.7e-42	Nectriaceae
MA3_01858	92637.XP_007812703.1	2.6e-107	Clavicipitaceae	ko:K14213					Cyclin-dependent protein kinase complex component (Pcl8)
MA3_01862	140110.NechaP60557	1.1e-305	Nectriaceae						Thiamine pyrophosphate enzyme, central domain
MA3_01863	568076.XP_007823377.1	9.9e-180	Clavicipitaceae						Belongs to the oxygen-dependent FAD-linked oxidoreductase family
MA3_01864	29875.EHK15217	1.9e-11	Hypocreaceae	ko:K03781	ko00380, ko00630, ko01110, ko01130, ko01200, ko04011, ko04016, ko04068, ko04146, ko04211, ko04212, ko04213, ko05014, map00380, map00630, map01110, map01130, map01200, map04011, map04016, map04068, map04146, map04211, map04212, map04213, map05014	M00532	R00009, R00602, R02670	RC00034, RC00767, RC02141, RC02755	Occurs in almost all aerobically respiring organisms and serves to protect cells from the toxic effects of hydrogen peroxide
MA3_01866	140110.NechaP93051	2e-194	Nectriaceae						UDP-glucose/GDP-mannose dehydrogenase family, central domain
MA3_01869	140110.NechaP93052	6.5e-170	Nectriaceae						Chitin binding domain
MA3_01870	117187.FVEG_05597T0	1.6e-302	Nectriaceae	ko:K00698	ko00520, map00520		R02335	RC00005	Chitin synthase
MA3_01871	13684.SNOT_01489	2.7e-280	Pleosporales						Glycoside hydrolase family 43 protein
MA3_01872	72228.T5AG63	1.3e-08	Fungi
MA3_01873	51453.EGR45765	7.3e-201	Hypocreaceae						Belongs to the peptidase M28 family
MA3_01875	140110.NechaP68815	6.7e-263	Nectriaceae	ko:K01697	ko00260, ko00270, ko01100, ko01130, ko01230, map00260, map00270, map01100, map01130, map01230	M00035,M00338	R00891, R01290, R04942	RC00056, RC00069, RC00256, RC00489, RC01246	Belongs to the cysteine synthase cystathionine beta- synthase family
MA3_01876	117187.FVEG_05603T0	8e-117	Nectriaceae	ko:K12272	ko03060, map03060				Signal recognition particle receptor beta subunit
MA3_01877	140110.NechaP39593	4.9e-288	Nectriaceae	ko:K20032					Belongs to the DHHC palmitoyltransferase family
MA3_01882	140110.NechaP79601	1.4e-107	Nectriaceae						integral membrane protein
MA3_01883	117187.FVEG_05608T0	7.9e-173	Nectriaceae						N amino acid transport system protein
MA3_01884	117187.FVEG_05606T0	2.2e-84	Nectriaceae
MA3_01885	5507.FOXG_02423P0	2.6e-235	Nectriaceae						L-lysine 6-monooxygenase (NADPH-requiring)
MA3_01886	40559.M7TW93	1.8e-14	Ascomycota
MA3_01887	117187.FVEG_05577T0	2.1e-35	Hypocreales
MA3_01888	5127.CCT66413	6.8e-262	Nectriaceae						FAD-binding domain
MA3_01890	140110.NechaP60550	2.1e-70	Nectriaceae						GPI anchored protein
MA3_01891	140110.NechaP100285	0	Nectriaceae						ABC transporter transmembrane region
MA3_01892	31870.EFQ32860	1.1e-185	Glomerellales	ko:K16261					Amino acid permease
MA3_01895	140110.NechaP68795	2.7e-267	Nectriaceae
MA3_01896	140110.NechaP68793	0	Nectriaceae	ko:K10661	ko04141, map04141				The RING-variant domain is a C4HC3 zinc-finger like motif found in a number of cellular and viral proteins. Some of these proteins have been shown both in vivo and in vitro to have ubiquitin E3 ligase activity.
MA3_01899	568076.XP_007822278.1	1.3e-94	Clavicipitaceae	ko:K16738					NUDE protein, C-terminal conserved region
MA3_01903	140110.NechaP60541	0	Nectriaceae	ko:K11262	ko00061, ko00254, ko00620, ko00640, ko01100, ko01110, ko01212, ko04152, ko04910, ko04922, map00061, map00254, map00620, map00640, map01100, map01110, map01212, map04152, map04910, map04922	M00082	R00742, R04385, R04386	RC00040, RC00253, RC00367	acetyl-CoA carboxylase
MA3_01904	117187.FVEG_05563T0	1.3e-29	Nectriaceae	ko:K22075					Belongs to the BolA IbaG family
MA3_01905	140110.NechaP90117	1.6e-39	Nectriaceae						Taurine catabolism dioxygenase TauD, TfdA family
MA3_01908	38033.XP_001225298.1	7e-80	Chaetomiaceae						Fungal specific transcription factor domain
MA3_01910	5059.CADAFLAP00003197	7.2e-106	Eurotiomycetes						Peptidase dimerisation domain
MA3_01913	140110.NechaP74920	1.7e-145	Nectriaceae	ko:K01626	ko00400, ko01100, ko01110, ko01130, ko01230, ko02024, map00400, map01100, map01110, map01130, map01230, map02024	M00022	R01826	RC00435	Stereospecific condensation of phosphoenolpyruvate (PEP) and D-erythrose-4-phosphate (E4P) giving rise to 3-deoxy-D- arabino-heptulosonate-7-phosphate (DAHP)
MA3_01915	1108849.XP_002568384.1	0	Eurotiales	ko:K01187	ko00052, ko00500, ko01100, map00052, map00500, map01100		R00028, R00801, R00802, R06087, R06088	RC00028, RC00049, RC00077	Belongs to the glycosyl hydrolase 31 family
MA3_01918	69781.S7ZHR4	1.7e-132	Eurotiales	ko:K04781	ko01053, ko01110, ko01130, map01053, map01110, map01130		R06602	RC01549, RC02148	chorismate binding enzyme
MA3_01921	5465.ENH79915	2.1e-88	Glomerellales						Sodium hydrogen exchanger family protein
MA3_01922	1173701.A0A066X9G4	7.1e-82	Glomerellales						Sodium hydrogen exchanger family protein
MA3_01924	5518.FGSG_06572P0	4.4e-302	Nectriaceae						Belongs to the peptidase S8 family
MA3_01926	140110.NechaP68778	1.8e-310	Nectriaceae	ko:K01887	ko00970, map00970	M00359,M00360	R03646	RC00055, RC00523	Belongs to the class-I aminoacyl-tRNA synthetase family
MA3_01927	140110.NechaP39621	5.9e-230	Hypocreales						Major Facilitator Superfamily
MA3_01930	140110.NechaP100276	4.6e-136	Nectriaceae						integral membrane protein
MA3_01932	5507.FOXG_02376P0	0	Nectriaceae						HET-s LopB domain-containing protein
MA3_01933	117187.FVEG_05559T0	2.4e-54	Nectriaceae						Coiled-coil domain-containing protein 25
MA3_01935	101028.EKJ78223	7.8e-13	Nectriaceae
MA3_01937	710243.XP_007590390.1	1.2e-248	Glomerellales	ko:K01188	ko00460, ko00500, ko00940, ko01100, ko01110, map00460, map00500, map00940, map01100, map01110		R00026, R02558, R02887, R02985, R03527, R04949, R04998, R10035, R10039, R10040	RC00049, RC00059, RC00171, RC00262, RC00397, RC00451, RC00714, RC00746, RC01248	Belongs to the glycosyl hydrolase 1 family
MA3_01939	140110.NechaP60613	8e-214	Nectriaceae	ko:K14213					manganese ion binding
MA3_01941	5507.FOXG_02470P0	6e-213	Nectriaceae						Riboflavin kinase
MA3_01942	148304.MAPG_09234T0	3.3e-66	Magnaporthales
MA3_01944	31870.EFQ32853	2.3e-82	Glomerellales
MA3_01945	35720.XP_003653469.1	2.4e-56	Chaetomiaceae						Enoyl-(Acyl carrier protein) reductase
MA3_01946	5507.FOXG_02473P0	4.5e-268	Nectriaceae						Conserved hypothetical protein
MA3_01954	5507.FOXG_02474P0	7.1e-196	Nectriaceae						to amino acid permease
MA3_01955	140110.NechaP68874	1.4e-38	Nectriaceae						to amino acid permease
MA3_01957	117187.FVEG_05662T0	1.3e-65	Nectriaceae						Cofilin/tropomyosin-type actin-binding protein
MA3_01958	140110.NechaP39151	8.8e-164	Nectriaceae						Major Facilitator Superfamily
MA3_01960	1173701.A0A066XZ36	3.3e-24	Glomerellales
MA3_01962	140110.NechaP52059	3.1e-71	Nectriaceae	ko:K09983					Domain of unknown function (DUF1993)
MA3_01963	63402.XP_003171286.1	3.7e-149	Onygenales						Fungal specific transcription factor domain
MA3_01964	92637.XP_007812236.1	8.1e-126	Hypocreales						RTA1 like protein
MA3_01965	29875.EHK26170	1.1e-25	Hypocreaceae
MA3_01966	1108849.XP_002562875.1	9.2e-230	Eurotiales						Ankyrin repeats (many copies)
MA3_01968	97096.XP_007791208.1	1.7e-212	Sordariomycetes						cytochrome P-450
MA3_01969	140110.NechaP42983	4.4e-203	Nectriaceae						formaldehyde dehydrogenase
MA3_01970	140110.NechaP54021	2.6e-120	Nectriaceae						Aldo/keto reductase family
MA3_01971	5507.FOXG_09966P0	3.3e-306	Nectriaceae						Male sterility protein
MA3_01972	61273.S3C6N2	9.7e-246	Ophiostomatales						Sugar (and other) transporter
MA3_01974	140110.NechaP81277	6e-47	Nectriaceae	ko:K00863	ko00051, ko00561, ko00680, ko01100, ko01120, ko01200, ko04622, map00051, map00561, map00680, map01100, map01120, map01200, map04622	M00344	R01011, R01059	RC00002, RC00017	Dak2
MA3_01975	5507.FOXG_11581P0	1.6e-232	Nectriaceae						Fungal specific transcription factor domain
MA3_01976	117187.FVEG_10247T0	6.1e-137	Nectriaceae						Enoyl-(Acyl carrier protein) reductase
[truncated: 9,491 more rows]

## Sheet: S3
Supplementary Table S3. Summary of PHI-base orthologs found in the predicted proteome of N. psidii MA3
Query Protein/Gene	Subject ID	PHI_baseID	Pathogen	Effect	e-value
[truncated: 10,312 more rows]

## Sheet: S4
Supplementary Table S4.	Annotation of the Secretome and prediction of effectors. Effectors were predicted using EffectorP and EffectorP2 with a probalility of P >0.5. ApoplastP and Localizer was used to predict the sub-cellular subcellular localization of effectors.
[truncated: 974 more rows]

[truncated: 9 more sheets: S5, S6, S7.1, S7.2, S8.1, S8.2, S9, S10, S11]
